# Supplementary material for: The role of halide ions in the carboxylative cyclization of propargyl alcohol with CO2 on CuX-deposited UiO-67(bpy) MOFs (X = F, Cl, Br, and I): a DFT study
Source: Royal Society of Chemistry journal article supplement (doi:10.1039/d4nj02174f), 2024-01-01
Supplement: d4nj02174f1.pdf [file d4nj02174f1.pdf]

ARTICLE

Received 00th January 20xx,

**The role of halide ions in the carboxylative cyclization of propargyl alcohol with CO<sub>2</sub> on CuX -deposited UiO-67(bpy) MOFs (X = F, Cl, Br, and I): a DFT study**

Accepted 00th January 20xx

Jakkapan Sirijaraensre,\*

DOI: 10.1039/x0xx00000x

**Supporting Information**

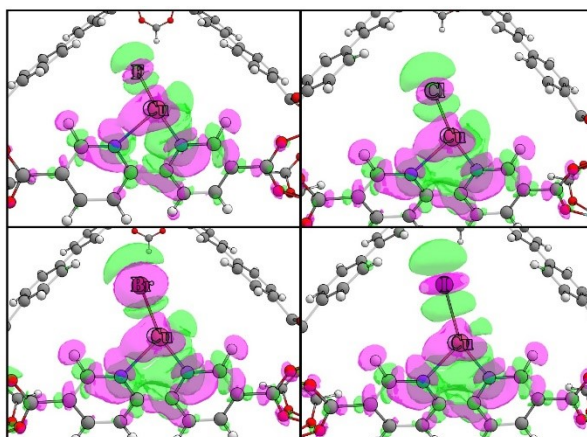

**Fig. S1** Illustration of the electron density difference (EDD) (isovalue = 0.001 e a.u.<sup>-3</sup>) of the CuX-deposited UiO-67(bpy) MOF (X = F, Cl, Br, and I). Green and pink regions represent the areas of electron accumulation and electron depletion, respectively.

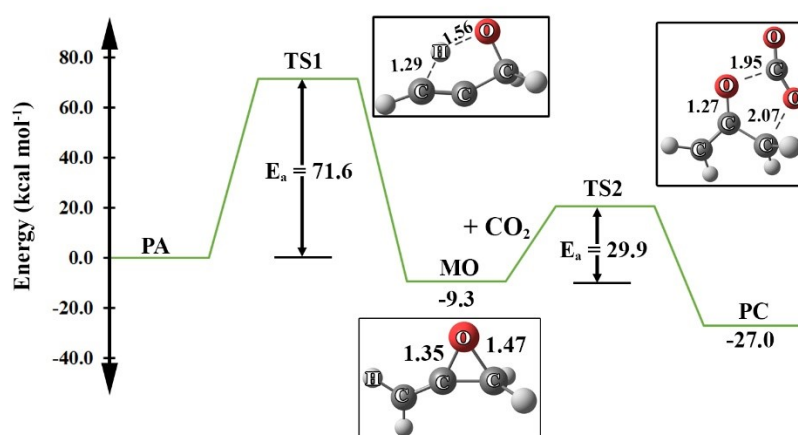

**Fig. S2** Energetic profile for the carboxylative cycloaddition of CO<sub>2</sub> with propargyl alcohol through the formation of methyleneoxirane (MO) without a catalyst.

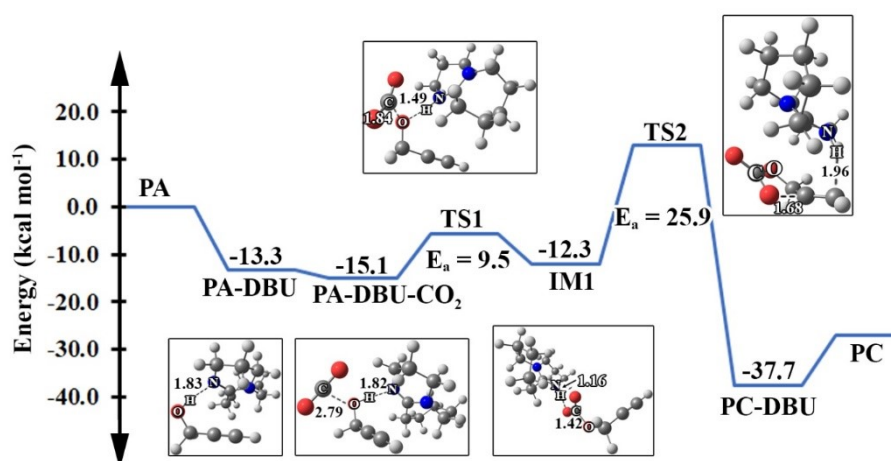

**Fig. S3** Energetic profile for the carboxylative cycloaddition of CO<sub>2</sub> with propargyl alcohol catalyzed by the DBU base.

**Table S1** Distortion/interaction energy analysis of the propargyl alcohol adsorption on the Cu center of systems in the C-bound configuration (PA complex).  
Energies are in kcal mol<sup>-1</sup>.

| Systems                    | $E_{\text{dist}}(\text{CuX-UiO-67}(\text{bpy}))^{\text{a}}$ | $E_{\text{dist}}(\text{PA})^{\text{b}}$ | $E_{\text{int}}^{\text{c}}$ | $E_{\text{ads}}$ |
|----------------------------|-------------------------------------------------------------|-----------------------------------------|-----------------------------|------------------|
| CuF-deposited UiO-67(bpy)  | 30.7                                                        | 9.6                                     | -59.2                       | -18.8            |
| CuCl-deposited UiO-67(bpy) | 24.3                                                        | 7.6                                     | -49.4                       | -17.5            |
| CuBr-deposited UiO-67(bpy) | 23.4                                                        | 7.7                                     | -47.7                       | -16.7            |
| CuI-deposited UiO-67(bpy)  | 18.0                                                        | 7.6                                     | -42.1                       | -16.5            |

$$^{\text{a}}E_{\text{dist}}(\text{CuX-UiO-67}(\text{bpy})) = E_{\text{CuX-UiO-67}(\text{bpy})}^{\text{PA}} - E_{\text{CuX-UiO-67}(\text{bpy})}^{\text{isolated}}$$

$$^{\text{b}}E_{\text{dist}}(\text{PA}) = E_{\text{PA}}^{\text{PA}} - E_{\text{PA}}^{\text{isolated}}$$

$$^{\text{c}}E_{\text{int}} = E_{\text{PA/CuX-UiO-67}(\text{bpy})}^{\text{PA}} - E_{\text{CuX-UiO-67}(\text{bpy})}^{\text{PA}} - E_{\text{PA}}^{\text{PA}}$$

## Coordinate all optimized structures.

## 1. CuF-UiO-67(bpy) system

## a. Isolated

|    |              |              |              |
|----|--------------|--------------|--------------|
| N  | 26.614805000 | 21.880054000 | 20.395678000 |
| N  | 26.745525000 | 19.944091000 | 18.425389000 |
| C  | 26.623720000 | 20.591445000 | 20.792807000 |
| C  | 26.661745000 | 22.858159000 | 21.307628000 |
| C  | 26.774190000 | 18.999369000 | 17.450176000 |
| C  | 26.612416000 | 19.547714000 | 19.729491000 |
| C  | 26.665568000 | 20.273148000 | 22.160134000 |
| C  | 26.705974000 | 22.634341000 | 22.694965000 |
| C  | 26.693320000 | 17.625985000 | 17.686423000 |
| C  | 26.494415000 | 18.183434000 | 20.024923000 |
| C  | 26.701849000 | 21.292510000 | 23.101229000 |
| C  | 26.544296000 | 17.226312000 | 19.023073000 |
| C  | 26.809925000 | 23.730886000 | 23.728973000 |
| C  | 26.809925000 | 16.592377000 | 16.590464000 |
| O  | 26.880885000 | 24.934153000 | 23.334955000 |
| O  | 26.880903000 | 23.334945000 | 24.934136000 |
| O  | 26.880903000 | 15.387214000 | 16.986405000 |
| O  | 26.880885000 | 16.986395000 | 15.387197000 |
| Zr | 26.878142000 | 26.881612000 | 24.237883000 |
| Zr | 26.878209000 | 24.239690000 | 26.880717000 |
| Zr | 26.878209000 | 13.440633000 | 16.081660000 |
| Zr | 26.878142000 | 16.083467000 | 13.439738000 |
| O  | 24.934203000 | 26.880849000 | 23.334882000 |
| O  | 25.848911000 | 25.848918000 | 25.848917000 |
| O  | 25.849015000 | 27.912768000 | 25.849028000 |
| O  | 27.912782000 | 25.849032000 | 25.849031000 |
| O  | 27.912889000 | 27.912886000 | 25.848919000 |
| O  | 26.880945000 | 28.827581000 | 23.334856000 |
| O  | 28.827591000 | 26.880922000 | 23.334870000 |
| O  | 24.934197000 | 23.334881000 | 26.880846000 |
| O  | 25.849012000 | 25.849025000 | 27.912771000 |
| O  | 27.912892000 | 25.848913000 | 27.912887000 |
| O  | 26.880944000 | 23.334850000 | 28.827576000 |
| O  | 28.827591000 | 23.334868000 | 26.880917000 |
| O  | 25.849012000 | 12.408579000 | 14.472325000 |
| O  | 25.848911000 | 14.472433000 | 14.472432000 |
| O  | 24.934197000 | 13.440504000 | 16.986469000 |
| O  | 26.880944000 | 11.493774000 | 16.986500000 |
| O  | 27.912892000 | 12.408463000 | 14.472437000 |
| O  | 27.912782000 | 14.472319000 | 14.472318000 |
| O  | 28.827591000 | 13.440433000 | 16.986482000 |
| O  | 25.849015000 | 14.472322000 | 12.408582000 |
| O  | 24.934203000 | 16.986468000 | 13.440501000 |
| O  | 27.912889000 | 14.472431000 | 12.408464000 |
| O  | 26.880945000 | 16.986494000 | 11.493769000 |
| O  | 28.827591000 | 16.986480000 | 13.440428000 |
| C  | 23.755332000 | 26.686089000 | 23.755213000 |
| Zr | 24.236612000 | 26.881475000 | 26.880552000 |
| Zr | 26.880671000 | 29.524609000 | 26.880680000 |
| Zr | 29.524440000 | 26.882357000 | 26.881381000 |
| C  | 27.064326000 | 30.008530000 | 23.753165000 |
| C  | 30.008123000 | 27.066993000 | 23.753823000 |
| C  | 23.755714000 | 23.756676000 | 26.684338000 |
| Zr | 26.880615000 | 26.881402000 | 29.524137000 |
| C  | 27.065914000 | 23.754135000 | 30.008060000 |
| C  | 30.007964000 | 23.754748000 | 27.067567000 |

|    |              |              |              |
|----|--------------|--------------|--------------|
| Zr | 24.236612000 | 13.440798000 | 13.439875000 |
| Zr | 26.880615000 | 10.797213000 | 13.439948000 |
| C  | 23.755714000 | 13.637012000 | 16.564674000 |
| C  | 27.065914000 | 10.313290000 | 16.567215000 |
| Zr | 29.524440000 | 13.439969000 | 13.438993000 |
| C  | 30.007964000 | 13.253783000 | 16.566602000 |
| Zr | 26.880671000 | 13.440670000 | 10.796741000 |
| C  | 23.755332000 | 16.566137000 | 13.635261000 |
| C  | 27.064326000 | 16.568185000 | 10.312820000 |
| C  | 30.008123000 | 16.567527000 | 13.254357000 |
| O  | 23.334855000 | 26.880866000 | 24.934215000 |
| O  | 23.334856000 | 24.934212000 | 26.880862000 |
| O  | 25.848909000 | 27.912895000 | 27.912897000 |
| O  | 23.334862000 | 26.880939000 | 28.827594000 |
| O  | 23.334864000 | 28.827596000 | 26.880937000 |
| O  | 24.934210000 | 30.426941000 | 26.880925000 |
| O  | 26.880889000 | 30.426939000 | 24.934203000 |
| O  | 26.880879000 | 30.426942000 | 28.827590000 |
| O  | 27.912786000 | 27.912776000 | 27.912777000 |
| O  | 28.827596000 | 30.426944000 | 26.880863000 |
| O  | 30.426933000 | 24.934198000 | 26.880924000 |
| O  | 30.426936000 | 26.880929000 | 24.934199000 |
| O  | 30.426944000 | 26.880866000 | 28.827595000 |
| O  | 30.426946000 | 28.827594000 | 26.880867000 |
| O  | 24.934211000 | 26.880924000 | 30.426942000 |
| O  | 26.880889000 | 24.934201000 | 30.426937000 |
| O  | 26.880878000 | 28.827589000 | 30.426943000 |
| O  | 28.827598000 | 26.880862000 | 30.426940000 |
| O  | 25.848909000 | 12.408453000 | 12.408455000 |
| O  | 23.334862000 | 11.493756000 | 13.440411000 |
| O  | 23.334855000 | 15.387135000 | 13.440484000 |
| O  | 23.334864000 | 13.440413000 | 11.493754000 |
| O  | 23.334856000 | 13.440488000 | 15.387138000 |
| O  | 24.934211000 | 9.894408000  | 13.440426000 |
| O  | 26.880889000 | 9.894413000  | 15.387149000 |
| O  | 27.912786000 | 12.408573000 | 12.408574000 |
| O  | 26.880878000 | 9.894407000  | 11.493761000 |
| O  | 28.827598000 | 9.894410000  | 13.440488000 |
| O  | 30.426944000 | 11.493755000 | 13.440484000 |
| O  | 30.426936000 | 15.387151000 | 13.440421000 |
| O  | 30.426946000 | 13.440483000 | 11.493756000 |
| O  | 30.426933000 | 13.440426000 | 15.387152000 |
| O  | 24.934210000 | 13.440425000 | 9.894409000  |
| O  | 26.880879000 | 11.493760000 | 9.894408000  |
| O  | 26.880889000 | 15.387147000 | 9.894411000  |
| O  | 28.827596000 | 13.440487000 | 9.894406000  |
| C  | 23.753697000 | 27.066116000 | 30.007949000 |
| C  | 23.753135000 | 30.008630000 | 27.063604000 |
| C  | 26.696398000 | 30.008246000 | 30.008106000 |
| C  | 30.007968000 | 30.008237000 | 26.695581000 |
| C  | 30.008286000 | 26.697416000 | 30.008420000 |
| C  | 23.753697000 | 10.313401000 | 13.255234000 |
| C  | 23.753135000 | 13.257746000 | 10.312720000 |
| C  | 26.696398000 | 10.313244000 | 10.313104000 |
| C  | 30.008286000 | 10.312930000 | 13.623934000 |
| C  | 30.007968000 | 13.625768000 | 10.313113000 |
| H  | 27.351814000 | 30.759513000 | 23.002127000 |
| H  | 30.758179000 | 27.358190000 | 23.003211000 |
| H  | 23.008991000 | 23.009158000 | 26.377462000 |
| H  | 27.355985000 | 23.003402000 | 30.758391000 |
| H  | 30.757581000 | 23.004153000 | 27.359935000 |

|    |              |              |              |    |              |              |              |
|----|--------------|--------------|--------------|----|--------------|--------------|--------------|
| H  | 23.008991000 | 13.943888000 | 17.312192000 | H  | 21.176773000 | 16.322082000 | 12.956594000 |
| H  | 27.355985000 | 9.562959000  | 17.317948000 | H  | 19.491341000 | 18.007515000 | 12.843694000 |
| H  | 30.757582000 | 12.961415000 | 17.317197000 | C  | 22.988008000 | 18.960712000 | 13.761408000 |
| H  | 27.351814000 | 17.319223000 | 9.561837000  | C  | 22.003898000 | 19.936757000 | 13.776461000 |
| H  | 30.758179000 | 17.318139000 | 12.963160000 | H  | 23.999268000 | 19.144577000 | 13.924306000 |
| H  | 23.003255000 | 27.356162000 | 30.758555000 | H  | 22.313835000 | 20.830009000 | 14.037206000 |
| H  | 23.001913000 | 30.759916000 | 27.349810000 | Zr | 10.956924000 | 26.880900000 | 13.440450000 |
| H  | 26.407446000 | 30.758917000 | 30.758911000 | O  | 9.894590000  | 26.880900000 | 11.493735000 |
| H  | 30.758582000 | 30.758568000 | 26.405278000 | O  | 12.408223000 | 27.913127000 | 14.472677000 |
| H  | 30.759373000 | 26.409850000 | 30.759355000 | C  | 10.287052000 | 26.880900000 | 10.287052000 |
| H  | 23.003255000 | 9.562795000  | 12.965188000 | Zr | 15.923976000 | 26.880900000 | 13.440450000 |
| H  | 23.001913000 | 12.971540000 | 9.561434000  | O  | 16.986310000 | 26.880900000 | 11.493735000 |
| H  | 26.407446000 | 9.562439000  | 9.562434000  | C  | 16.593848000 | 26.880900000 | 10.287052000 |
| H  | 30.759373000 | 9.561995000  | 13.911500000 | O  | 16.986310000 | 26.880900000 | 15.387165000 |
| H  | 30.758582000 | 13.916071000 | 9.562782000  | O  | 14.472677000 | 27.913127000 | 12.408223000 |
| H  | 25.215026000 | 11.776433000 | 15.102845000 | C  | 16.593848000 | 26.880900000 | 16.593848000 |
| H  | 28.544134000 | 11.776251000 | 11.775822000 | C  | 17.650268000 | 26.880900000 | 17.650268000 |
| H  | 28.555271000 | 15.099035000 | 15.098322000 | C  | 19.634347000 | 26.880900000 | 19.634347000 |
| H  | 25.215244000 | 15.103495000 | 11.776660000 | O  | 9.894590000  | 26.880900000 | 15.387165000 |
| H  | 25.215244000 | 28.544690000 | 25.217855000 | C  | 10.287052000 | 26.880900000 | 16.593848000 |
| H  | 28.555271000 | 25.223028000 | 25.222315000 | Zr | 13.440450000 | 26.880900000 | 15.923976000 |
| H  | 28.544134000 | 28.545528000 | 28.545099000 | O  | 11.493735000 | 26.880900000 | 16.986310000 |
| H  | 25.215026000 | 25.218505000 | 28.544917000 | O  | 14.472677000 | 27.913127000 | 14.472677000 |
| O  | 14.472677000 | 25.848673000 | 14.472677000 | Zr | 13.440450000 | 26.880900000 | 10.956924000 |
| O  | 12.408223000 | 25.848673000 | 12.408223000 | O  | 11.493735000 | 26.880900000 | 9.894590000  |
| O  | 14.472677000 | 25.848673000 | 12.408223000 | O  | 15.387165000 | 26.880900000 | 9.894590000  |
| O  | 12.408223000 | 25.848673000 | 14.472677000 | O  | 12.408223000 | 27.913127000 | 12.408223000 |
| Zr | 13.440450000 | 24.397374000 | 13.440450000 | O  | 15.387165000 | 26.880900000 | 16.986310000 |
| O  | 11.493735000 | 23.335040000 | 13.440450000 | Zr | 13.440450000 | 29.364426000 | 13.440450000 |
| C  | 10.287052000 | 23.727502000 | 13.440450000 | O  | 11.493735000 | 30.426760000 | 13.440450000 |
| O  | 15.387165000 | 23.335040000 | 13.440450000 | C  | 10.287052000 | 30.034298000 | 13.440450000 |
| C  | 16.593848000 | 23.727502000 | 13.440450000 | O  | 15.387165000 | 30.426760000 | 13.440450000 |
| C  | 17.650268000 | 22.671082000 | 13.440450000 | C  | 16.593848000 | 30.034298000 | 13.440450000 |
| C  | 19.634347000 | 20.687003000 | 13.440450000 | O  | 16.986310000 | 28.827615000 | 13.440450000 |
| C  | 18.960712000 | 22.988008000 | 13.761408000 | O  | 9.894590000  | 28.827615000 | 13.440450000 |
| C  | 19.936757000 | 22.003898000 | 13.776461000 | C  | 22.671082000 | 26.880900000 | 22.671082000 |
| H  | 19.144577000 | 23.999268000 | 13.924306000 | C  | 20.687003000 | 26.880900000 | 20.687003000 |
| H  | 20.830009000 | 22.313835000 | 14.037206000 | C  | 21.360638000 | 27.201858000 | 22.988008000 |
| O  | 9.894590000  | 24.934185000 | 13.440450000 | C  | 20.384593000 | 27.216911000 | 22.003898000 |
| O  | 16.986310000 | 24.934185000 | 13.440450000 | H  | 21.176773000 | 27.364756000 | 23.999268000 |
| C  | 17.333342000 | 21.360638000 | 13.119492000 | H  | 19.491341000 | 27.477656000 | 22.313835000 |
| C  | 18.317452000 | 20.384593000 | 13.104439000 | O  | 13.440450000 | 28.827615000 | 16.986310000 |
| H  | 16.322082000 | 21.176773000 | 12.956594000 | C  | 13.440450000 | 30.034298000 | 16.593848000 |
| H  | 18.007515000 | 19.491341000 | 12.843694000 | O  | 13.440450000 | 28.827615000 | 9.894590000  |
| C  | 22.988008000 | 26.559942000 | 21.360638000 | C  | 13.440450000 | 30.034298000 | 10.287052000 |
| C  | 22.003898000 | 26.544889000 | 20.384593000 | O  | 13.440450000 | 30.426760000 | 15.387165000 |
| H  | 23.999268000 | 26.397044000 | 21.176773000 | O  | 13.440450000 | 30.426760000 | 11.493735000 |
| H  | 22.313835000 | 26.284144000 | 19.491341000 | C  | 17.333342000 | 27.201858000 | 18.960712000 |
| C  | 22.671082000 | 17.650268000 | 13.440450000 | C  | 18.317452000 | 27.216911000 | 19.936757000 |
| C  | 20.687003000 | 19.634347000 | 13.440450000 | H  | 16.322082000 | 27.364756000 | 19.144577000 |
| O  | 13.440450000 | 24.934185000 | 9.894590000  | H  | 18.007515000 | 27.477656000 | 20.830009000 |
| C  | 13.440450000 | 23.727502000 | 10.287052000 | H  | 13.440450000 | 30.790903000 | 9.530447000  |
| O  | 13.440450000 | 24.934185000 | 16.986310000 | H  | 17.350453000 | 26.880900000 | 9.530447000  |
| C  | 13.440450000 | 23.727502000 | 16.593848000 | H  | 17.350453000 | 30.790903000 | 13.440450000 |
| O  | 13.440450000 | 23.335040000 | 15.387165000 | H  | 13.440450000 | 30.790903000 | 17.350453000 |
| O  | 13.440450000 | 23.335040000 | 11.493735000 | H  | 9.530447000  | 30.790903000 | 13.440450000 |
| C  | 18.960712000 | 26.559942000 | 17.333342000 | H  | 9.530447000  | 26.880900000 | 17.350453000 |
| C  | 19.936757000 | 26.544889000 | 18.317452000 | H  | 13.440450000 | 22.970897000 | 9.530447000  |
| H  | 19.144577000 | 26.397044000 | 16.322082000 | H  | 9.530447000  | 22.970897000 | 13.440450000 |
| H  | 20.830009000 | 26.284144000 | 18.007515000 | H  | 13.440450000 | 22.970897000 | 17.350453000 |
| C  | 21.360638000 | 17.333342000 | 13.119492000 | H  | 15.026933000 | 25.294417000 | 11.853967000 |
| C  | 20.384593000 | 18.317452000 | 13.104439000 | H  | 11.853967000 | 28.467383000 | 11.853967000 |

## ARTICLE

## Journal Name

|              |              |              |              |    |              |              |              |
|--------------|--------------|--------------|--------------|----|--------------|--------------|--------------|
| H            | 9.530447000  | 26.880900000 | 9.530447000  | C  | 27.064326000 | 30.008530000 | 23.753165000 |
| H            | 15.026933000 | 28.467383000 | 15.026933000 | C  | 30.008123000 | 27.066993000 | 23.753823000 |
| H            | 11.853967000 | 25.294417000 | 15.026933000 | C  | 23.755714000 | 23.756676000 | 26.684338000 |
| H            | 26.667918000 | 23.872306000 | 20.912058000 | Zr | 26.880615000 | 26.881402000 | 29.524137000 |
| H            | 26.883128000 | 19.371762000 | 16.436087000 | C  | 27.065914000 | 23.754135000 | 30.008060000 |
| H            | 26.690551000 | 19.242247000 | 22.498070000 | C  | 30.007964000 | 23.754748000 | 27.067567000 |
| H            | 26.363859000 | 17.864740000 | 21.053146000 | Zr | 24.236612000 | 13.440798000 | 13.439875000 |
| H            | 26.744955000 | 21.065085000 | 24.161677000 | Zr | 26.880615000 | 10.797213000 | 13.439948000 |
| H            | 26.474706000 | 16.168920000 | 19.255748000 | C  | 23.755714000 | 13.637012000 | 16.564674000 |
| Cu           | 26.887622000 | 21.783198000 | 17.976187000 | C  | 27.065914000 | 10.313290000 | 16.567215000 |
| F            | 27.071580000 | 23.418063000 | 17.349871000 | Zr | 29.524440000 | 13.439969000 | 13.438993000 |
| <b>b. PA</b> |              |              |              | C  | 30.007964000 | 13.253783000 | 16.566602000 |
| N            | 26.795872000 | 21.899425000 | 20.381593000 | Zr | 26.880671000 | 13.440670000 | 10.796741000 |
| N            | 26.429501000 | 19.917235000 | 18.424116000 | C  | 23.755332000 | 16.566137000 | 13.635261000 |
| C            | 26.611770000 | 20.621677000 | 20.771545000 | C  | 27.064326000 | 16.568185000 | 10.312820000 |
| C            | 26.817108000 | 22.862981000 | 21.307190000 | C  | 30.008123000 | 16.567527000 | 13.254357000 |
| C            | 26.488826000 | 18.990906000 | 17.454235000 | O  | 23.334855000 | 26.880866000 | 24.934215000 |
| C            | 26.631141000 | 19.559191000 | 19.717250000 | O  | 23.334856000 | 24.934212000 | 26.880862000 |
| C            | 26.454202000 | 20.302367000 | 22.127170000 | O  | 25.848909000 | 27.912895000 | 27.912897000 |
| C            | 26.693073000 | 22.640604000 | 22.691334000 | O  | 23.334862000 | 26.880939000 | 28.827594000 |
| C            | 26.718924000 | 17.627499000 | 17.686122000 | O  | 23.334864000 | 28.827596000 | 26.880937000 |
| C            | 26.885165000 | 18.216912000 | 20.025352000 | O  | 24.934210000 | 30.426941000 | 26.880925000 |
| C            | 26.503020000 | 21.310099000 | 23.082209000 | O  | 26.880889000 | 30.426939000 | 24.934203000 |
| C            | 26.908155000 | 17.256011000 | 19.022749000 | O  | 26.880879000 | 30.426942000 | 28.827590000 |
| C            | 26.809925000 | 23.730886000 | 23.728973000 | O  | 27.912786000 | 27.912776000 | 27.912777000 |
| C            | 26.809925000 | 16.592377000 | 16.590464000 | O  | 28.827596000 | 30.426944000 | 26.880863000 |
| O            | 26.880885000 | 24.934153000 | 23.334955000 | O  | 30.426933000 | 24.934198000 | 26.880924000 |
| O            | 26.880903000 | 23.334945000 | 24.934136000 | O  | 30.426936000 | 26.880929000 | 24.934199000 |
| O            | 26.880903000 | 15.387214000 | 16.986405000 | O  | 30.426944000 | 26.880866000 | 28.827595000 |
| O            | 26.880885000 | 16.986395000 | 15.387197000 | O  | 30.426946000 | 28.827594000 | 26.880867000 |
| Zr           | 26.878142000 | 26.881612000 | 24.237883000 | O  | 24.934211000 | 26.880924000 | 30.426942000 |
| Zr           | 26.878209000 | 24.239690000 | 26.880717000 | O  | 26.880889000 | 24.934201000 | 30.426937000 |
| Zr           | 26.878209000 | 13.440633000 | 16.081660000 | O  | 26.880878000 | 28.827589000 | 30.426943000 |
| Zr           | 26.878142000 | 16.083467000 | 13.439738000 | O  | 28.827598000 | 26.880862000 | 30.426940000 |
| O            | 24.934203000 | 26.880849000 | 23.334882000 | O  | 25.848909000 | 12.408453000 | 12.408455000 |
| O            | 25.848911000 | 25.848918000 | 25.848917000 | O  | 23.334862000 | 11.493756000 | 13.440411000 |
| O            | 25.849015000 | 27.912768000 | 25.849028000 | O  | 23.334855000 | 15.387135000 | 13.440484000 |
| O            | 27.912782000 | 25.849032000 | 25.849031000 | O  | 23.334864000 | 13.440413000 | 11.493754000 |
| O            | 27.912889000 | 27.912886000 | 25.848919000 | O  | 23.334856000 | 13.440488000 | 15.387138000 |
| O            | 26.880945000 | 28.827581000 | 23.334856000 | O  | 24.934211000 | 9.894408000  | 13.440426000 |
| O            | 28.827591000 | 26.880922000 | 23.334870000 | O  | 26.880889000 | 9.894413000  | 15.387149000 |
| O            | 24.934197000 | 23.334881000 | 26.880846000 | O  | 27.912786000 | 12.408573000 | 12.408574000 |
| O            | 25.849012000 | 25.849025000 | 27.912771000 | O  | 26.880878000 | 9.894407000  | 11.493761000 |
| O            | 27.912892000 | 25.848913000 | 27.912887000 | O  | 28.827598000 | 9.894410000  | 13.440488000 |
| O            | 26.880944000 | 23.334850000 | 28.827576000 | O  | 30.426944000 | 11.493755000 | 13.440484000 |
| O            | 28.827591000 | 23.334868000 | 26.880917000 | O  | 30.426936000 | 15.387151000 | 13.440421000 |
| O            | 25.849012000 | 12.408579000 | 14.472325000 | O  | 30.426946000 | 13.440483000 | 11.493756000 |
| O            | 25.848911000 | 14.472433000 | 14.472432000 | O  | 30.426933000 | 13.440426000 | 15.387152000 |
| O            | 24.934197000 | 13.440504000 | 16.986469000 | O  | 24.934210000 | 13.440425000 | 9.894409000  |
| O            | 26.880944000 | 11.493774000 | 16.986500000 | O  | 26.880879000 | 11.493760000 | 9.894408000  |
| O            | 27.912892000 | 12.408463000 | 14.472437000 | O  | 26.880889000 | 15.387147000 | 9.894411000  |
| O            | 27.912782000 | 14.472319000 | 14.472318000 | O  | 28.827596000 | 13.440487000 | 9.894406000  |
| O            | 28.827591000 | 13.440433000 | 16.986482000 | C  | 23.753697000 | 27.066116000 | 30.007949000 |
| O            | 25.849015000 | 14.472322000 | 12.408582000 | C  | 23.753135000 | 30.008630000 | 27.063604000 |
| O            | 24.934203000 | 16.986468000 | 13.440501000 | C  | 26.696398000 | 30.008246000 | 30.008106000 |
| O            | 27.912889000 | 14.472431000 | 12.408464000 | C  | 30.007968000 | 30.008237000 | 26.695581000 |
| O            | 26.880945000 | 16.986494000 | 11.493769000 | C  | 30.008286000 | 26.697416000 | 30.008420000 |
| O            | 28.827591000 | 16.986480000 | 13.440428000 | C  | 23.753697000 | 10.313401000 | 13.255234000 |
| C            | 23.755332000 | 26.686089000 | 23.755213000 | C  | 23.753135000 | 13.257746000 | 10.312720000 |
| Zr           | 24.236612000 | 26.881475000 | 26.880552000 | C  | 26.696398000 | 10.313244000 | 10.313104000 |
| Zr           | 26.880671000 | 29.524609000 | 26.880680000 | C  | 30.008286000 | 10.312930000 | 13.623934000 |
| Zr           | 29.524440000 | 26.882357000 | 26.881381000 | C  | 30.007968000 | 13.625768000 | 10.313113000 |

| Journal Name |              |              |              | ARTICLE |              |              |              |
|--------------|--------------|--------------|--------------|---------|--------------|--------------|--------------|
| H            | 27.351814000 | 30.759513000 | 23.002127000 | C       | 19.936757000 | 26.544889000 | 18.317452000 |
| H            | 30.758179000 | 27.358190000 | 23.003211000 | H       | 19.144577000 | 26.397044000 | 16.322082000 |
| H            | 23.008991000 | 23.009158000 | 26.377462000 | H       | 20.830009000 | 26.284144000 | 18.007515000 |
| H            | 27.355985000 | 23.003402000 | 30.758391000 | C       | 21.360638000 | 17.333342000 | 13.119492000 |
| H            | 30.757581000 | 23.004153000 | 27.359935000 | C       | 20.384593000 | 18.317452000 | 13.104439000 |
| H            | 23.008991000 | 13.943888000 | 17.312192000 | H       | 21.176773000 | 16.322082000 | 12.956594000 |
| H            | 27.355985000 | 9.562959000  | 17.317948000 | H       | 19.491341000 | 18.007515000 | 12.843694000 |
| H            | 30.757582000 | 12.961415000 | 17.317197000 | C       | 22.988008000 | 18.960712000 | 13.761408000 |
| H            | 27.351814000 | 17.319223000 | 9.561837000  | C       | 22.003898000 | 19.936757000 | 13.776461000 |
| H            | 30.758179000 | 17.318139000 | 12.963160000 | H       | 23.999268000 | 19.144577000 | 13.924306000 |
| H            | 23.003255000 | 27.356162000 | 30.758555000 | H       | 22.313835000 | 20.830009000 | 14.037206000 |
| H            | 23.001913000 | 30.759916000 | 27.349810000 | Zr      | 10.956924000 | 26.880900000 | 13.440450000 |
| H            | 26.407446000 | 30.758917000 | 30.758911000 | O       | 9.894590000  | 26.880900000 | 11.493735000 |
| H            | 30.758582000 | 30.758568000 | 26.405278000 | O       | 12.408223000 | 27.913127000 | 14.472677000 |
| H            | 30.759373000 | 26.409850000 | 30.759355000 | C       | 10.287052000 | 26.880900000 | 10.287052000 |
| H            | 23.003255000 | 9.562795000  | 12.965188000 | Zr      | 15.923976000 | 26.880900000 | 13.440450000 |
| H            | 23.001913000 | 12.971540000 | 9.561434000  | O       | 16.986310000 | 26.880900000 | 11.493735000 |
| H            | 26.407446000 | 9.562439000  | 9.562434000  | C       | 16.593848000 | 26.880900000 | 10.287052000 |
| H            | 30.759373000 | 9.561995000  | 13.911500000 | O       | 16.986310000 | 26.880900000 | 15.387165000 |
| H            | 30.758582000 | 13.916071000 | 9.562782000  | O       | 14.472677000 | 27.913127000 | 12.408223000 |
| H            | 25.215026000 | 11.776433000 | 15.102845000 | C       | 16.593848000 | 26.880900000 | 16.593848000 |
| H            | 28.544134000 | 11.776251000 | 11.775822000 | C       | 17.650268000 | 26.880900000 | 17.650268000 |
| H            | 28.555271000 | 15.099035000 | 15.098322000 | C       | 19.634347000 | 26.880900000 | 19.634347000 |
| H            | 25.215244000 | 15.103495000 | 11.776660000 | O       | 9.894590000  | 26.880900000 | 15.387165000 |
| H            | 25.215244000 | 28.544690000 | 25.217855000 | C       | 10.287052000 | 26.880900000 | 16.593848000 |
| H            | 28.555271000 | 25.223028000 | 25.222315000 | Zr      | 13.440450000 | 26.880900000 | 15.923976000 |
| H            | 28.544134000 | 28.545528000 | 28.545099000 | O       | 11.493735000 | 26.880900000 | 16.986310000 |
| H            | 25.215026000 | 25.218505000 | 28.544917000 | O       | 14.472677000 | 27.913127000 | 14.472677000 |
| O            | 14.472677000 | 25.848673000 | 14.472677000 | Zr      | 13.440450000 | 26.880900000 | 10.956924000 |
| O            | 12.408223000 | 25.848673000 | 12.408223000 | O       | 11.493735000 | 26.880900000 | 9.894590000  |
| O            | 14.472677000 | 25.848673000 | 12.408223000 | O       | 15.387165000 | 26.880900000 | 9.894590000  |
| O            | 12.408223000 | 25.848673000 | 14.472677000 | O       | 12.408223000 | 27.913127000 | 12.408223000 |
| Zr           | 13.440450000 | 24.397374000 | 13.440450000 | O       | 15.387165000 | 26.880900000 | 16.986310000 |
| O            | 11.493735000 | 23.335040000 | 13.440450000 | Zr      | 13.440450000 | 29.364426000 | 13.440450000 |
| C            | 10.287052000 | 23.727502000 | 13.440450000 | O       | 11.493735000 | 30.426760000 | 13.440450000 |
| O            | 15.387165000 | 23.335040000 | 13.440450000 | C       | 10.287052000 | 30.034298000 | 13.440450000 |
| C            | 16.593848000 | 23.727502000 | 13.440450000 | O       | 15.387165000 | 30.426760000 | 13.440450000 |
| C            | 17.650268000 | 22.671082000 | 13.440450000 | C       | 16.593848000 | 30.034298000 | 13.440450000 |
| C            | 19.634347000 | 20.687003000 | 13.440450000 | O       | 16.986310000 | 28.827615000 | 13.440450000 |
| C            | 18.960712000 | 22.988008000 | 13.761408000 | O       | 9.894590000  | 28.827615000 | 13.440450000 |
| C            | 19.936757000 | 22.003898000 | 13.776461000 | C       | 22.671082000 | 26.880900000 | 22.671082000 |
| H            | 19.144577000 | 23.999268000 | 13.924306000 | C       | 20.687003000 | 26.880900000 | 20.687003000 |
| H            | 20.830009000 | 22.313835000 | 14.037206000 | C       | 21.360638000 | 27.201858000 | 22.988008000 |
| O            | 9.894590000  | 24.934185000 | 13.440450000 | C       | 20.384593000 | 27.216911000 | 22.003898000 |
| O            | 16.986310000 | 24.934185000 | 13.440450000 | H       | 21.176773000 | 27.364756000 | 23.999268000 |
| C            | 17.333342000 | 21.360638000 | 13.119492000 | H       | 19.491341000 | 27.477656000 | 22.313835000 |
| C            | 18.317452000 | 20.384593000 | 13.104439000 | O       | 13.440450000 | 28.827615000 | 16.986310000 |
| H            | 16.322082000 | 21.176773000 | 12.956594000 | C       | 13.440450000 | 30.034298000 | 16.593848000 |
| H            | 18.007515000 | 19.491341000 | 12.843694000 | O       | 13.440450000 | 28.827615000 | 9.894590000  |
| C            | 22.988008000 | 26.559942000 | 21.360638000 | C       | 13.440450000 | 30.034298000 | 10.287052000 |
| C            | 22.003898000 | 26.544889000 | 20.384593000 | O       | 13.440450000 | 30.426760000 | 15.387165000 |
| H            | 23.999268000 | 26.397044000 | 21.176773000 | O       | 13.440450000 | 30.426760000 | 11.493735000 |
| H            | 22.313835000 | 26.284144000 | 19.491341000 | C       | 17.333342000 | 27.201858000 | 18.960712000 |
| C            | 22.671082000 | 17.650268000 | 13.440450000 | C       | 18.317452000 | 27.216911000 | 19.936757000 |
| C            | 20.687003000 | 19.634347000 | 13.440450000 | H       | 16.322082000 | 27.364756000 | 19.144577000 |
| O            | 13.440450000 | 24.934185000 | 9.894590000  | H       | 18.007515000 | 27.477656000 | 20.830009000 |
| C            | 13.440450000 | 23.727502000 | 10.287052000 | H       | 13.440450000 | 30.790903000 | 9.530447000  |
| O            | 13.440450000 | 24.934185000 | 16.986310000 | H       | 17.350453000 | 26.880900000 | 9.530447000  |
| C            | 13.440450000 | 23.727502000 | 16.593848000 | H       | 17.350453000 | 30.790903000 | 13.440450000 |
| O            | 13.440450000 | 23.335040000 | 15.387165000 | H       | 13.440450000 | 30.790903000 | 17.350453000 |
| O            | 13.440450000 | 23.335040000 | 11.493735000 | H       | 9.530447000  | 30.790903000 | 13.440450000 |
| C            | 18.960712000 | 26.559942000 | 17.333342000 | H       | 9.530447000  | 26.880900000 | 17.350453000 |

## ARTICLE

## Journal Name

|                  |              |              |              |    |              |              |              |
|------------------|--------------|--------------|--------------|----|--------------|--------------|--------------|
| H                | 13.440450000 | 22.970897000 | 9.530447000  | O  | 26.880944000 | 11.493774000 | 16.986500000 |
| H                | 9.530447000  | 22.970897000 | 13.440450000 | O  | 27.912892000 | 12.408463000 | 14.472437000 |
| H                | 13.440450000 | 22.970897000 | 17.350453000 | O  | 27.912782000 | 14.472319000 | 14.472318000 |
| H                | 15.026933000 | 25.294417000 | 11.853967000 | O  | 28.827591000 | 13.440433000 | 16.986482000 |
| H                | 11.853967000 | 28.467383000 | 11.853967000 | O  | 25.849015000 | 14.472322000 | 12.408582000 |
| H                | 9.530447000  | 26.880900000 | 9.530447000  | O  | 24.934203000 | 16.986468000 | 13.440501000 |
| H                | 15.026933000 | 28.467383000 | 15.026933000 | O  | 27.912889000 | 14.472431000 | 12.408464000 |
| H                | 11.853967000 | 25.294417000 | 15.026933000 | O  | 26.880945000 | 16.986494000 | 11.493769000 |
| H                | 26.958271000 | 23.877300000 | 20.936456000 | O  | 28.827591000 | 16.986480000 | 13.440428000 |
| H                | 26.328311000 | 19.352755000 | 16.441186000 | C  | 23.755332000 | 26.686089000 | 23.755213000 |
| H                | 26.270644000 | 19.279365000 | 22.439945000 | Zr | 24.236612000 | 26.881475000 | 26.880552000 |
| H                | 27.081131000 | 17.922512000 | 21.050965000 | Zr | 26.880671000 | 29.524609000 | 26.880680000 |
| H                | 26.394006000 | 21.079784000 | 24.137609000 | Zr | 29.524440000 | 26.882357000 | 26.881381000 |
| H                | 27.095047000 | 16.212887000 | 19.257742000 | C  | 27.064326000 | 30.008530000 | 23.753165000 |
| Cu               | 25.443893000 | 21.705508000 | 18.229548000 | C  | 30.008123000 | 27.066993000 | 23.753823000 |
| F                | 24.204826000 | 21.148590000 | 19.492187000 | C  | 23.755714000 | 23.756676000 | 26.684338000 |
| C                | 24.908329000 | 23.361682000 | 17.427979000 | Zr | 26.880615000 | 26.881402000 | 29.524137000 |
| C                | 25.933601000 | 22.941755000 | 16.826943000 | C  | 27.065914000 | 23.754135000 | 30.008060000 |
| H                | 26.726084000 | 23.001047000 | 16.102622000 | C  | 30.007964000 | 23.754748000 | 27.067567000 |
| C                | 23.741333000 | 24.154052000 | 17.844811000 | Zr | 24.236612000 | 13.440798000 | 13.439875000 |
| H                | 23.906188000 | 24.503246000 | 18.869185000 | Zr | 26.880615000 | 10.797213000 | 13.439948000 |
| H                | 22.859957000 | 23.496224000 | 17.891160000 | C  | 23.755714000 | 13.637012000 | 16.564674000 |
| O                | 23.521524000 | 25.303949000 | 17.053324000 | C  | 27.065914000 | 10.313290000 | 16.567215000 |
| H                | 23.320944000 | 24.999735000 | 16.162989000 | Zr | 29.524440000 | 13.439969000 | 13.438993000 |
| <b>c. PA/DBU</b> |              |              |              | C  | 30.007964000 | 13.253783000 | 16.566602000 |
| N                | 26.322094000 | 21.892596000 | 20.410751000 | Zr | 26.880671000 | 13.440670000 | 10.796741000 |
| N                | 26.684151000 | 19.953192000 | 18.381063000 | C  | 23.755332000 | 16.566137000 | 13.635261000 |
| C                | 26.656993000 | 20.632897000 | 20.747721000 | C  | 27.064326000 | 16.568185000 | 10.312820000 |
| C                | 26.378149000 | 22.853883000 | 21.339945000 | C  | 30.008123000 | 16.567527000 | 13.254357000 |
| C                | 26.703124000 | 19.006201000 | 17.420895000 | O  | 23.334855000 | 26.880866000 | 24.934215000 |
| C                | 26.637034000 | 19.581367000 | 19.682991000 | O  | 23.334856000 | 24.934212000 | 26.880862000 |
| C                | 27.025031000 | 20.322140000 | 22.068091000 | O  | 25.848909000 | 27.912895000 | 27.912897000 |
| C                | 26.721277000 | 22.639397000 | 22.687010000 | O  | 23.334862000 | 26.880939000 | 28.827594000 |
| C                | 26.702275000 | 17.630622000 | 17.679021000 | O  | 23.334864000 | 28.827596000 | 26.880937000 |
| C                | 26.577832000 | 18.218336000 | 20.015071000 | O  | 24.934210000 | 30.426941000 | 26.880925000 |
| C                | 27.035243000 | 21.319319000 | 23.034501000 | O  | 26.880889000 | 30.426939000 | 24.934203000 |
| C                | 26.620298000 | 17.248822000 | 19.023800000 | O  | 26.880879000 | 30.426942000 | 28.827590000 |
| C                | 26.809925000 | 23.730886000 | 23.728973000 | O  | 27.912786000 | 27.912776000 | 27.912777000 |
| C                | 26.809925000 | 16.592377000 | 16.590464000 | O  | 28.827596000 | 30.426944000 | 26.880863000 |
| O                | 26.880885000 | 24.934153000 | 23.334955000 | O  | 30.426933000 | 24.934198000 | 26.880924000 |
| O                | 26.880903000 | 23.334945000 | 24.934136000 | O  | 30.426936000 | 26.880929000 | 24.934199000 |
| O                | 26.880903000 | 15.387214000 | 16.986405000 | O  | 30.426944000 | 26.880866000 | 28.827595000 |
| O                | 26.880885000 | 16.986395000 | 15.387197000 | O  | 30.426946000 | 28.827594000 | 26.880867000 |
| Zr               | 26.878142000 | 26.881612000 | 24.237883000 | O  | 24.934211000 | 26.880924000 | 30.426942000 |
| Zr               | 26.878209000 | 24.239690000 | 26.880717000 | O  | 26.880889000 | 24.934201000 | 30.426937000 |
| Zr               | 26.878209000 | 13.440633000 | 16.081660000 | O  | 26.880878000 | 28.827589000 | 30.426943000 |
| Zr               | 26.878142000 | 16.083467000 | 13.439738000 | O  | 28.827598000 | 26.880862000 | 30.426940000 |
| O                | 24.934203000 | 26.880849000 | 23.334882000 | O  | 25.848909000 | 12.408453000 | 12.408455000 |
| O                | 25.848911000 | 25.848918000 | 25.848917000 | O  | 23.334862000 | 11.493756000 | 13.440411000 |
| O                | 25.849015000 | 27.912768000 | 25.849028000 | O  | 23.334855000 | 15.387135000 | 13.440484000 |
| O                | 27.912782000 | 25.849032000 | 25.849031000 | O  | 23.334864000 | 13.440413000 | 11.493754000 |
| O                | 27.912889000 | 27.912886000 | 25.848919000 | O  | 23.334856000 | 13.440488000 | 15.387138000 |
| O                | 26.880945000 | 28.827581000 | 23.334856000 | O  | 24.934211000 | 9.894408000  | 13.440426000 |
| O                | 28.827591000 | 26.880922000 | 23.334870000 | O  | 26.880889000 | 9.894413000  | 15.387149000 |
| O                | 24.934197000 | 23.334881000 | 26.880846000 | O  | 27.912786000 | 12.408573000 | 12.408574000 |
| O                | 25.849012000 | 25.849025000 | 27.912771000 | O  | 26.880878000 | 9.894407000  | 11.493761000 |
| O                | 27.912892000 | 25.848913000 | 27.912887000 | O  | 28.827598000 | 9.894410000  | 13.440488000 |
| O                | 26.880944000 | 23.334850000 | 28.827576000 | O  | 30.426944000 | 11.493755000 | 13.440484000 |
| O                | 28.827591000 | 23.334868000 | 26.880917000 | O  | 30.426936000 | 15.387151000 | 13.440421000 |
| O                | 25.849012000 | 12.408579000 | 14.472325000 | O  | 30.426946000 | 13.440483000 | 11.493756000 |
| O                | 25.848911000 | 14.472433000 | 14.472432000 | O  | 30.426933000 | 13.440426000 | 15.387152000 |
| O                | 24.934197000 | 13.440504000 | 16.986469000 | O  | 24.934210000 | 13.440425000 | 9.894409000  |



| Journal Name | ARTICLE      |              |              |    |              |              |              |
|--------------|--------------|--------------|--------------|----|--------------|--------------|--------------|
| O            | 26.880879000 | 11.493760000 | 9.894408000  | C  | 22.988008000 | 26.559942000 | 21.360638000 |
| O            | 26.880889000 | 15.387147000 | 9.894411000  | C  | 22.003898000 | 26.544889000 | 20.384593000 |
| O            | 28.827596000 | 13.440487000 | 9.894406000  | H  | 23.999268000 | 26.397044000 | 21.176773000 |
| C            | 23.753697000 | 27.066116000 | 30.007949000 | H  | 22.313835000 | 26.284144000 | 19.491341000 |
| C            | 23.753135000 | 30.008630000 | 27.063604000 | C  | 22.671082000 | 17.650268000 | 13.440450000 |
| C            | 26.696398000 | 30.008246000 | 30.008106000 | C  | 20.687003000 | 19.634347000 | 13.440450000 |
| C            | 30.007968000 | 30.008237000 | 26.695581000 | O  | 13.440450000 | 24.934185000 | 9.894590000  |
| C            | 30.008286000 | 26.697416000 | 30.008420000 | C  | 13.440450000 | 23.727502000 | 10.287052000 |
| C            | 23.753697000 | 10.313401000 | 13.255234000 | O  | 13.440450000 | 24.934185000 | 16.986310000 |
| C            | 23.753135000 | 13.257746000 | 10.312720000 | C  | 13.440450000 | 23.727502000 | 16.593848000 |
| C            | 26.696398000 | 10.313244000 | 10.313104000 | O  | 13.440450000 | 23.335040000 | 15.387165000 |
| C            | 30.008286000 | 10.312930000 | 13.623934000 | O  | 13.440450000 | 23.335040000 | 11.493735000 |
| C            | 30.007968000 | 13.625768000 | 10.313113000 | C  | 18.960712000 | 26.559942000 | 17.333342000 |
| H            | 27.351814000 | 30.759513000 | 23.002127000 | C  | 19.936757000 | 26.544889000 | 18.317452000 |
| H            | 30.758179000 | 27.358190000 | 23.003211000 | H  | 19.144577000 | 26.397044000 | 16.322082000 |
| H            | 23.008991000 | 23.009158000 | 26.377462000 | H  | 20.830009000 | 26.284144000 | 18.007515000 |
| H            | 27.355985000 | 23.003402000 | 30.758391000 | C  | 21.360638000 | 17.333342000 | 13.119492000 |
| H            | 30.757581000 | 23.004153000 | 27.359935000 | C  | 20.384593000 | 18.317452000 | 13.104439000 |
| H            | 23.008991000 | 13.943888000 | 17.312192000 | H  | 21.176773000 | 16.322082000 | 12.956594000 |
| H            | 27.355985000 | 9.562959000  | 17.317948000 | H  | 19.491341000 | 18.007515000 | 12.843694000 |
| H            | 30.757582000 | 12.961415000 | 17.317197000 | C  | 22.988008000 | 18.960712000 | 13.761408000 |
| H            | 27.351814000 | 17.319223000 | 9.561837000  | C  | 22.003898000 | 19.936757000 | 13.776461000 |
| H            | 30.758179000 | 17.318139000 | 12.963160000 | H  | 23.999268000 | 19.144577000 | 13.924306000 |
| H            | 23.003255000 | 27.356162000 | 30.758555000 | H  | 22.313835000 | 20.830009000 | 14.037206000 |
| H            | 23.001913000 | 30.759916000 | 27.349810000 | Zr | 10.956924000 | 26.880900000 | 13.440450000 |
| H            | 26.407446000 | 30.758917000 | 30.758911000 | O  | 9.894590000  | 26.880900000 | 11.493735000 |
| H            | 30.758582000 | 30.758568000 | 26.405278000 | O  | 12.408223000 | 27.913127000 | 14.472677000 |
| H            | 30.759373000 | 26.409850000 | 30.759355000 | C  | 10.287052000 | 26.880900000 | 10.287052000 |
| H            | 23.003255000 | 9.562795000  | 12.965188000 | Zr | 15.923976000 | 26.880900000 | 13.440450000 |
| H            | 23.001913000 | 12.971540000 | 9.561434000  | O  | 16.986310000 | 26.880900000 | 11.493735000 |
| H            | 26.407446000 | 9.562439000  | 9.562434000  | C  | 16.593848000 | 26.880900000 | 10.287052000 |
| H            | 30.759373000 | 9.561995000  | 13.911500000 | O  | 16.986310000 | 26.880900000 | 15.387165000 |
| H            | 30.758582000 | 13.916071000 | 9.562782000  | O  | 14.472677000 | 27.913127000 | 12.408223000 |
| H            | 25.215026000 | 11.776433000 | 15.102845000 | C  | 16.593848000 | 26.880900000 | 16.593848000 |
| H            | 28.544134000 | 11.776251000 | 11.775822000 | C  | 17.650268000 | 26.880900000 | 17.650268000 |
| H            | 28.555271000 | 15.099035000 | 15.098322000 | C  | 19.634347000 | 26.880900000 | 19.634347000 |
| H            | 25.215244000 | 15.103495000 | 11.776660000 | O  | 9.894590000  | 26.880900000 | 15.387165000 |
| H            | 25.215244000 | 28.544690000 | 25.217855000 | C  | 10.287052000 | 26.880900000 | 16.593848000 |
| H            | 28.555271000 | 25.223028000 | 25.222315000 | Zr | 13.440450000 | 26.880900000 | 15.923976000 |
| H            | 28.544134000 | 28.545528000 | 28.545099000 | O  | 11.493735000 | 26.880900000 | 16.986310000 |
| H            | 25.215026000 | 25.218505000 | 28.544917000 | O  | 14.472677000 | 27.913127000 | 14.472677000 |
| O            | 14.472677000 | 25.848673000 | 14.472677000 | Zr | 13.440450000 | 26.880900000 | 10.956924000 |
| O            | 12.408223000 | 25.848673000 | 12.408223000 | O  | 11.493735000 | 26.880900000 | 9.894590000  |
| O            | 14.472677000 | 25.848673000 | 12.408223000 | O  | 15.387165000 | 26.880900000 | 9.894590000  |
| O            | 12.408223000 | 25.848673000 | 14.472677000 | O  | 12.408223000 | 27.913127000 | 12.408223000 |
| Zr           | 13.440450000 | 24.397374000 | 13.440450000 | O  | 15.387165000 | 26.880900000 | 16.986310000 |
| O            | 11.493735000 | 23.335040000 | 13.440450000 | Zr | 13.440450000 | 29.364426000 | 13.440450000 |
| C            | 10.287052000 | 23.727502000 | 13.440450000 | O  | 11.493735000 | 30.426760000 | 13.440450000 |
| O            | 15.387165000 | 23.335040000 | 13.440450000 | C  | 10.287052000 | 30.034298000 | 13.440450000 |
| C            | 16.593848000 | 23.727502000 | 13.440450000 | O  | 15.387165000 | 30.426760000 | 13.440450000 |
| C            | 17.650268000 | 22.671082000 | 13.440450000 | C  | 16.593848000 | 30.034298000 | 13.440450000 |
| C            | 19.634347000 | 20.687003000 | 13.440450000 | O  | 16.986310000 | 28.827615000 | 13.440450000 |
| C            | 18.960712000 | 22.988008000 | 13.761408000 | O  | 9.894590000  | 28.827615000 | 13.440450000 |
| C            | 19.936757000 | 22.003898000 | 13.776461000 | C  | 22.671082000 | 26.880900000 | 22.671082000 |
| H            | 19.144577000 | 23.999268000 | 13.924306000 | C  | 20.687003000 | 26.880900000 | 20.687003000 |
| H            | 20.830009000 | 22.313835000 | 14.037206000 | C  | 21.360638000 | 27.201858000 | 22.988008000 |
| O            | 9.894590000  | 24.934185000 | 13.440450000 | C  | 20.384593000 | 27.216911000 | 22.003898000 |
| O            | 16.986310000 | 24.934185000 | 13.440450000 | H  | 21.176773000 | 27.364756000 | 23.999268000 |
| C            | 17.333342000 | 21.360638000 | 13.119492000 | H  | 19.491341000 | 27.477656000 | 22.313835000 |
| C            | 18.317452000 | 20.384593000 | 13.104439000 | O  | 13.440450000 | 28.827615000 | 16.986310000 |
| H            | 16.322082000 | 21.176773000 | 12.956594000 | C  | 13.440450000 | 30.034298000 | 16.593848000 |
| H            | 18.007515000 | 19.491341000 | 12.843694000 | O  | 13.440450000 | 28.827615000 | 9.894590000  |

| ARTICLE |              |              |              | Journal Name                    |              |              |              |
|---------|--------------|--------------|--------------|---------------------------------|--------------|--------------|--------------|
| C       | 13.440450000 | 30.034298000 | 10.287052000 | H                               | 23.264570000 | 21.462841000 | 11.550867000 |
| O       | 13.440450000 | 30.426760000 | 15.387165000 | H                               | 24.071575000 | 19.981621000 | 11.078812000 |
| O       | 13.440450000 | 30.426760000 | 11.493735000 | <b>d. PC/DBU/CO<sub>2</sub></b> |              |              |              |
| C       | 17.333342000 | 27.201858000 | 18.960712000 | N                               | 26.271672000 | 21.893237000 | 20.416812000 |
| C       | 18.317452000 | 27.216911000 | 19.936757000 | N                               | 26.523920000 | 19.942111000 | 18.379365000 |
| H       | 16.322082000 | 27.364756000 | 19.144577000 | C                               | 26.625802000 | 20.635744000 | 20.744592000 |
| H       | 18.007515000 | 27.477656000 | 20.830009000 | C                               | 26.336833000 | 22.852823000 | 21.346739000 |
| H       | 13.440450000 | 30.790903000 | 9.530447000  | C                               | 26.576690000 | 18.988857000 | 17.424817000 |
| H       | 17.350453000 | 26.880900000 | 9.530447000  | C                               | 26.599807000 | 19.579572000 | 19.682973000 |
| H       | 17.350453000 | 30.790903000 | 13.440450000 | C                               | 27.027680000 | 20.330409000 | 22.056922000 |
| H       | 13.440450000 | 30.790903000 | 17.350453000 | C                               | 26.712675000 | 22.641958000 | 22.686119000 |
| H       | 9.530447000  | 30.790903000 | 13.440450000 | C                               | 26.698212000 | 17.621956000 | 17.684323000 |
| H       | 9.530447000  | 26.880900000 | 17.350453000 | C                               | 26.666800000 | 18.216833000 | 20.019755000 |
| H       | 13.440450000 | 22.970897000 | 9.530447000  | C                               | 27.048162000 | 21.325716000 | 23.024265000 |
| H       | 9.530447000  | 22.970897000 | 13.440450000 | C                               | 26.715462000 | 17.244182000 | 19.032397000 |
| H       | 13.440450000 | 22.970897000 | 17.350453000 | C                               | 26.809925000 | 23.730886000 | 23.728973000 |
| H       | 15.026933000 | 25.294417000 | 11.853967000 | C                               | 26.809925000 | 16.592377000 | 16.590464000 |
| H       | 11.853967000 | 28.467383000 | 11.853967000 | O                               | 26.880885000 | 24.934153000 | 23.334955000 |
| H       | 9.530447000  | 26.880900000 | 9.530447000  | O                               | 26.880903000 | 23.334945000 | 24.934136000 |
| H       | 15.026933000 | 28.467383000 | 15.026933000 | O                               | 26.880903000 | 15.387214000 | 16.986405000 |
| H       | 11.853967000 | 25.294417000 | 15.026933000 | O                               | 26.880885000 | 16.986395000 | 15.387197000 |
| H       | 26.121901000 | 23.856772000 | 20.998707000 | Zr                              | 26.878142000 | 26.881612000 | 24.237883000 |
| H       | 26.699917000 | 19.380146000 | 16.401824000 | Zr                              | 26.878209000 | 24.239690000 | 26.880717000 |
| H       | 27.326881000 | 19.315473000 | 22.339926000 | Zr                              | 26.878209000 | 13.440633000 | 16.081660000 |
| H       | 26.478863000 | 17.916513000 | 21.052419000 | Zr                              | 26.878142000 | 16.083467000 | 13.439738000 |
| H       | 27.310987000 | 21.095140000 | 24.060522000 | O                               | 24.934203000 | 26.880849000 | 23.334882000 |
| H       | 26.588125000 | 16.193079000 | 19.274860000 | O                               | 25.848911000 | 25.848918000 | 25.848917000 |
| Cu      | 26.247230000 | 21.810900000 | 17.579937000 | O                               | 25.849015000 | 27.912768000 | 25.849028000 |
| F       | 25.029583000 | 20.964395000 | 16.439088000 | O                               | 27.912782000 | 25.849032000 | 25.849031000 |
| C       | 26.267218000 | 23.704051000 | 17.122409000 | O                               | 27.912889000 | 27.912886000 | 25.848919000 |
| C       | 27.244961000 | 23.456298000 | 17.871468000 | O                               | 26.880945000 | 28.827581000 | 23.334856000 |
| H       | 28.106066000 | 23.694577000 | 18.468566000 | O                               | 28.827591000 | 26.880922000 | 23.334870000 |
| C       | 25.308411000 | 24.343054000 | 16.189371000 | O                               | 24.934197000 | 23.334881000 | 26.880846000 |
| H       | 24.704022000 | 25.054980000 | 16.767432000 | O                               | 25.849012000 | 25.849025000 | 27.912771000 |
| H       | 24.625983000 | 23.565292000 | 15.811979000 | O                               | 27.912892000 | 25.848913000 | 27.912887000 |
| O       | 25.942664000 | 25.043843000 | 15.156554000 | O                               | 26.880944000 | 23.334850000 | 28.827576000 |
| H       | 26.254445000 | 24.330042000 | 14.541559000 | O                               | 28.827591000 | 23.334868000 | 26.880917000 |
| C       | 25.182228000 | 23.142502000 | 10.161624000 | O                               | 25.849012000 | 12.408579000 | 14.472325000 |
| C       | 24.333813000 | 23.974508000 | 11.122543000 | O                               | 25.848911000 | 14.472433000 | 14.472432000 |
| C       | 24.336661000 | 23.484320000 | 12.593565000 | O                               | 24.934197000 | 13.440504000 | 16.986469000 |
| C       | 24.649239000 | 21.732579000 | 9.920101000  | O                               | 26.880944000 | 11.493774000 | 16.986500000 |
| C       | 25.377344000 | 22.438372000 | 12.897585000 | O                               | 27.912892000 | 12.408463000 | 14.472437000 |
| C       | 24.228584000 | 21.056434000 | 11.224472000 | O                               | 27.912782000 | 14.472319000 | 14.472318000 |
| N       | 25.195230000 | 21.213999000 | 12.296258000 | O                               | 28.827591000 | 13.440433000 | 16.986482000 |
| H       | 25.273304000 | 23.667181000 | 9.204320000  | O                               | 25.849015000 | 14.472322000 | 12.408582000 |
| H       | 25.412869000 | 21.131708000 | 9.409975000  | O                               | 24.934203000 | 16.986468000 | 13.440501000 |
| C       | 27.338140000 | 21.739500000 | 14.036068000 | O                               | 27.912889000 | 14.472431000 | 12.408464000 |
| N       | 26.356584000 | 22.753880000 | 13.682538000 | O                               | 26.880945000 | 16.986494000 | 11.493769000 |
| C       | 26.848692000 | 20.319970000 | 13.808258000 | O                               | 28.827591000 | 16.986480000 | 13.440428000 |
| C       | 26.245910000 | 20.216383000 | 12.421855000 | C                               | 23.755332000 | 26.686089000 | 23.755213000 |
| H       | 25.806292000 | 19.231408000 | 12.243130000 | Zr                              | 24.236612000 | 26.881475000 | 26.880552000 |
| H       | 27.591626000 | 21.883142000 | 15.096954000 | Zr                              | 26.880671000 | 29.524609000 | 26.880680000 |
| H       | 26.202728000 | 23.078534000 | 10.563549000 | Zr                              | 29.524440000 | 26.882357000 | 26.881381000 |
| H       | 23.780356000 | 21.761620000 | 9.249452000  | C                               | 27.064326000 | 30.008530000 | 23.753165000 |
| H       | 27.022283000 | 20.364140000 | 11.648198000 | C                               | 30.008123000 | 27.066993000 | 23.753823000 |
| H       | 28.264904000 | 21.933159000 | 13.473259000 | C                               | 23.755714000 | 23.756676000 | 26.684338000 |
| H       | 23.302154000 | 24.021624000 | 10.750326000 | Zr                              | 26.880615000 | 26.881402000 | 29.524137000 |
| H       | 24.705070000 | 25.003755000 | 11.099196000 | C                               | 27.065914000 | 23.754135000 | 30.008060000 |
| H       | 27.656930000 | 19.589743000 | 13.929861000 | C                               | 30.007964000 | 23.754748000 | 27.067567000 |
| H       | 26.074767000 | 20.114586000 | 14.557509000 | Zr                              | 24.236612000 | 13.440798000 | 13.439875000 |
| H       | 24.524047000 | 24.319260000 | 13.272543000 | Zr                              | 26.880615000 | 10.797213000 | 13.439948000 |
| H       | 23.353735000 | 23.081159000 | 12.865476000 | C                               | 23.755714000 | 13.637012000 | 16.564674000 |

| Journal Name | ARTICLE      |              |              |    |              |              |              |
|--------------|--------------|--------------|--------------|----|--------------|--------------|--------------|
| C            | 27.065914000 | 10.313290000 | 16.567215000 | H  | 30.758179000 | 17.318139000 | 12.963160000 |
| Zr           | 29.524440000 | 13.439969000 | 13.438993000 | H  | 23.003255000 | 27.356162000 | 30.758555000 |
| C            | 30.007964000 | 13.253783000 | 16.566602000 | H  | 23.001913000 | 30.759916000 | 27.349810000 |
| Zr           | 26.880671000 | 13.440670000 | 10.796741000 | H  | 26.407446000 | 30.758917000 | 30.758911000 |
| C            | 23.755332000 | 16.566137000 | 13.635261000 | H  | 30.758582000 | 30.758568000 | 26.405278000 |
| C            | 27.064326000 | 16.568185000 | 10.312820000 | H  | 30.759373000 | 26.409850000 | 30.759355000 |
| C            | 30.008123000 | 16.567527000 | 13.254357000 | H  | 23.003255000 | 9.562795000  | 12.965188000 |
| O            | 23.334855000 | 26.880866000 | 24.934215000 | H  | 23.001913000 | 12.971540000 | 9.561434000  |
| O            | 23.334856000 | 24.934212000 | 26.880862000 | H  | 26.407446000 | 9.562439000  | 9.562434000  |
| O            | 25.848909000 | 27.912895000 | 27.912897000 | H  | 30.759373000 | 9.561995000  | 13.911500000 |
| O            | 23.334862000 | 26.880939000 | 28.827594000 | H  | 30.758582000 | 13.916071000 | 9.562782000  |
| O            | 23.334864000 | 28.827596000 | 26.880937000 | H  | 25.215026000 | 11.776433000 | 15.102845000 |
| O            | 24.934210000 | 30.426941000 | 26.880925000 | H  | 28.544134000 | 11.776251000 | 11.775822000 |
| O            | 26.880889000 | 30.426939000 | 24.934203000 | H  | 28.555271000 | 15.099035000 | 15.098322000 |
| O            | 26.880879000 | 30.426942000 | 28.827590000 | H  | 25.215244000 | 15.103495000 | 11.776660000 |
| O            | 27.912786000 | 27.912776000 | 27.912777000 | H  | 25.215244000 | 28.544690000 | 25.217855000 |
| O            | 28.827596000 | 30.426944000 | 26.880863000 | H  | 28.555271000 | 25.223028000 | 25.222315000 |
| O            | 30.426933000 | 24.934198000 | 26.880924000 | H  | 28.544134000 | 28.545528000 | 28.545099000 |
| O            | 30.426936000 | 26.880929000 | 24.934199000 | H  | 25.215026000 | 25.218505000 | 28.544917000 |
| O            | 30.426944000 | 26.880866000 | 28.827595000 | O  | 14.472677000 | 25.848673000 | 14.472677000 |
| O            | 30.426946000 | 28.827594000 | 26.880867000 | O  | 12.408223000 | 25.848673000 | 12.408223000 |
| O            | 24.934211000 | 26.880924000 | 30.426942000 | O  | 14.472677000 | 25.848673000 | 12.408223000 |
| O            | 26.880889000 | 24.934201000 | 30.426937000 | O  | 12.408223000 | 25.848673000 | 14.472677000 |
| O            | 26.880878000 | 28.827589000 | 30.426943000 | Zr | 13.440450000 | 24.397374000 | 13.440450000 |
| O            | 28.827598000 | 26.880862000 | 30.426940000 | O  | 11.493735000 | 23.335040000 | 13.440450000 |
| O            | 25.848909000 | 12.408453000 | 12.408455000 | C  | 10.287052000 | 23.727502000 | 13.440450000 |
| O            | 23.334862000 | 11.493756000 | 13.440411000 | O  | 15.387165000 | 23.335040000 | 13.440450000 |
| O            | 23.334855000 | 15.387135000 | 13.440484000 | C  | 16.593848000 | 23.727502000 | 13.440450000 |
| O            | 23.334864000 | 13.440413000 | 11.493754000 | C  | 17.650268000 | 22.671082000 | 13.440450000 |
| O            | 23.334856000 | 13.440488000 | 15.387138000 | C  | 19.634347000 | 20.687003000 | 13.440450000 |
| O            | 24.934211000 | 9.894408000  | 13.440426000 | C  | 18.960712000 | 22.988008000 | 13.761408000 |
| O            | 26.880889000 | 9.894413000  | 15.387149000 | C  | 19.936757000 | 22.003898000 | 13.776461000 |
| O            | 27.912786000 | 12.408573000 | 12.408574000 | H  | 19.144577000 | 23.999268000 | 13.924306000 |
| O            | 26.880878000 | 9.894407000  | 11.493761000 | H  | 20.830009000 | 22.313835000 | 14.037206000 |
| O            | 28.827598000 | 9.894410000  | 13.440488000 | O  | 9.894590000  | 24.934185000 | 13.440450000 |
| O            | 30.426944000 | 11.493755000 | 13.440484000 | O  | 16.986310000 | 24.934185000 | 13.440450000 |
| O            | 30.426936000 | 15.387151000 | 13.440421000 | C  | 17.333342000 | 21.360638000 | 13.119492000 |
| O            | 30.426946000 | 13.440483000 | 11.493756000 | C  | 18.317452000 | 20.384593000 | 13.104439000 |
| O            | 30.426933000 | 13.440426000 | 15.387152000 | H  | 16.322082000 | 21.176773000 | 12.956594000 |
| O            | 24.934210000 | 13.440425000 | 9.894409000  | H  | 18.007515000 | 19.491341000 | 12.843694000 |
| O            | 26.880879000 | 11.493760000 | 9.894408000  | C  | 22.988008000 | 26.559942000 | 21.360638000 |
| O            | 26.880889000 | 15.387147000 | 9.894411000  | C  | 22.003898000 | 26.544889000 | 20.384593000 |
| O            | 28.827596000 | 13.440487000 | 9.894406000  | H  | 23.999268000 | 26.397044000 | 21.176773000 |
| C            | 23.753697000 | 27.066116000 | 30.007949000 | H  | 22.313835000 | 26.284144000 | 19.491341000 |
| C            | 23.753135000 | 30.008630000 | 27.063604000 | C  | 22.671082000 | 17.650268000 | 13.440450000 |
| C            | 26.696398000 | 30.008246000 | 30.008106000 | C  | 20.687003000 | 19.634347000 | 13.440450000 |
| C            | 30.007968000 | 30.008237000 | 26.695581000 | O  | 13.440450000 | 24.934185000 | 9.894590000  |
| C            | 30.008286000 | 26.697416000 | 30.008420000 | C  | 13.440450000 | 23.727502000 | 10.287052000 |
| C            | 23.753697000 | 10.313401000 | 13.255234000 | O  | 13.440450000 | 24.934185000 | 16.986310000 |
| C            | 23.753135000 | 13.257746000 | 10.312720000 | C  | 13.440450000 | 23.727502000 | 16.593848000 |
| C            | 26.696398000 | 10.313244000 | 10.313104000 | O  | 13.440450000 | 23.335040000 | 15.387165000 |
| C            | 30.008286000 | 10.312930000 | 13.623934000 | O  | 13.440450000 | 23.335040000 | 11.493735000 |
| C            | 30.007968000 | 13.625768000 | 10.313113000 | C  | 18.960712000 | 26.559942000 | 17.333342000 |
| H            | 27.351814000 | 30.759513000 | 23.002127000 | C  | 19.936757000 | 26.544889000 | 18.317452000 |
| H            | 30.758179000 | 27.358190000 | 23.003211000 | H  | 19.144577000 | 26.397044000 | 16.322082000 |
| H            | 23.008991000 | 23.009158000 | 26.377462000 | H  | 20.830009000 | 26.284144000 | 18.007515000 |
| H            | 27.355985000 | 23.003402000 | 30.758391000 | C  | 21.360638000 | 17.333342000 | 13.119492000 |
| H            | 30.757581000 | 23.004153000 | 27.359935000 | C  | 20.384593000 | 18.317452000 | 13.104439000 |
| H            | 23.008991000 | 13.943888000 | 17.312192000 | H  | 21.176773000 | 16.322082000 | 12.956594000 |
| H            | 27.355985000 | 9.562959000  | 17.317948000 | H  | 19.491341000 | 18.007515000 | 12.843694000 |
| H            | 30.757582000 | 12.961415000 | 17.317197000 | C  | 22.988008000 | 18.960712000 | 13.761408000 |
| H            | 27.351814000 | 17.319223000 | 9.561837000  | C  | 22.003898000 | 19.936757000 | 13.776461000 |

## ARTICLE

## Journal Name

|    |              |              |              |               |              |              |              |
|----|--------------|--------------|--------------|---------------|--------------|--------------|--------------|
| H  | 23.999268000 | 19.144577000 | 13.924306000 | H             | 26.487590000 | 19.341718000 | 16.405193000 |
| H  | 22.313835000 | 20.830009000 | 14.037206000 | H             | 27.345679000 | 19.328556000 | 22.325647000 |
| Zr | 10.956924000 | 26.880900000 | 13.440450000 | H             | 26.659815000 | 17.912654000 | 21.060486000 |
| O  | 9.894590000  | 26.880900000 | 11.493735000 | H             | 27.347070000 | 21.102235000 | 24.043963000 |
| O  | 12.408223000 | 27.913127000 | 14.472677000 | H             | 26.768876000 | 16.190939000 | 19.289837000 |
| C  | 10.287052000 | 26.880900000 | 10.287052000 | Cu            | 25.680273000 | 21.638998000 | 17.563606000 |
| Zr | 15.923976000 | 26.880900000 | 13.440450000 | F             | 24.544959000 | 20.492429000 | 16.582713000 |
| O  | 16.986310000 | 26.880900000 | 11.493735000 | C             | 25.201040000 | 23.372548000 | 16.825495000 |
| C  | 16.593848000 | 26.880900000 | 10.287052000 | C             | 26.193822000 | 23.523903000 | 17.579394000 |
| O  | 16.986310000 | 26.880900000 | 15.387165000 | H             | 26.952309000 | 24.074364000 | 18.104355000 |
| O  | 14.472677000 | 27.913127000 | 12.408223000 | C             | 24.106853000 | 23.467495000 | 15.832267000 |
| C  | 16.593848000 | 26.880900000 | 16.593848000 | H             | 23.183654000 | 23.719976000 | 16.369422000 |
| C  | 17.650268000 | 26.880900000 | 17.650268000 | H             | 23.959034000 | 22.461578000 | 15.408191000 |
| C  | 19.634347000 | 26.880900000 | 19.634347000 | O             | 24.329041000 | 24.447087000 | 14.852091000 |
| O  | 9.894590000  | 26.880900000 | 15.387165000 | H             | 24.892729000 | 24.009249000 | 14.162194000 |
| C  | 10.287052000 | 26.880900000 | 16.593848000 | C             | 25.544507000 | 21.915815000 | 9.651858000  |
| Zr | 13.440450000 | 26.880900000 | 15.923976000 | C             | 24.278323000 | 22.605508000 | 10.159023000 |
| O  | 11.493735000 | 26.880900000 | 16.986310000 | C             | 24.002132000 | 22.433767000 | 11.674614000 |
| O  | 14.472677000 | 27.913127000 | 14.472677000 | C             | 25.522038000 | 20.391314000 | 9.742137000  |
| Zr | 13.440450000 | 26.880900000 | 10.956924000 | C             | 25.191748000 | 21.933449000 | 12.448690000 |
| O  | 11.493735000 | 26.880900000 | 9.894590000  | C             | 24.998674000 | 19.894604000 | 11.089805000 |
| O  | 15.387165000 | 26.880900000 | 9.894590000  | N             | 25.552704000 | 20.628804000 | 12.216546000 |
| O  | 12.408223000 | 27.913127000 | 12.408223000 | H             | 25.731930000 | 22.215925000 | 8.615117000  |
| O  | 15.387165000 | 26.880900000 | 16.986310000 | H             | 26.536294000 | 20.006567000 | 9.570686000  |
| Zr | 13.440450000 | 29.364426000 | 13.440450000 | C             | 26.970872000 | 22.262309000 | 13.952846000 |
| O  | 11.493735000 | 30.426760000 | 13.440450000 | N             | 25.795996000 | 22.756592000 | 13.247927000 |
| C  | 10.287052000 | 30.034298000 | 13.440450000 | C             | 26.879728000 | 20.774547000 | 14.238092000 |
| O  | 15.387165000 | 30.426760000 | 13.440450000 | C             | 26.669844000 | 20.032929000 | 12.936668000 |
| C  | 16.593848000 | 30.034298000 | 13.440450000 | H             | 26.423287000 | 18.981733000 | 13.117994000 |
| O  | 16.986310000 | 28.827615000 | 13.440450000 | H             | 27.074096000 | 22.831686000 | 14.884350000 |
| O  | 9.894590000  | 28.827615000 | 13.440450000 | H             | 26.399595000 | 22.293993000 | 10.228417000 |
| C  | 22.671082000 | 26.880900000 | 22.671082000 | H             | 24.891460000 | 19.968194000 | 8.948701000  |
| C  | 20.687003000 | 26.880900000 | 20.687003000 | H             | 27.582178000 | 20.041484000 | 12.315305000 |
| C  | 21.360638000 | 27.201858000 | 22.988008000 | H             | 27.869906000 | 22.485155000 | 13.355481000 |
| C  | 20.384593000 | 27.216911000 | 22.003898000 | H             | 23.411226000 | 22.252344000 | 9.586613000  |
| H  | 21.176773000 | 27.364756000 | 23.999268000 | H             | 24.365647000 | 23.674151000 | 9.940076000  |
| H  | 19.491341000 | 27.477656000 | 22.313835000 | H             | 27.779892000 | 20.399886000 | 14.739736000 |
| O  | 13.440450000 | 28.827615000 | 16.986310000 | H             | 26.017952000 | 20.597372000 | 14.899175000 |
| C  | 13.440450000 | 30.034298000 | 16.593848000 | H             | 23.711698000 | 23.387000000 | 12.120228000 |
| O  | 13.440450000 | 28.827615000 | 9.894590000  | H             | 23.159764000 | 21.750798000 | 11.827251000 |
| C  | 13.440450000 | 30.034298000 | 10.287052000 | H             | 23.904586000 | 19.971833000 | 11.109004000 |
| O  | 13.440450000 | 30.426760000 | 15.387165000 | H             | 25.238164000 | 18.838641000 | 11.241129000 |
| O  | 13.440450000 | 30.426760000 | 11.493735000 | C             | 21.933624000 | 25.351355000 | 14.081096000 |
| C  | 17.333342000 | 27.201858000 | 18.960712000 | O             | 21.546049000 | 25.264647000 | 15.181102000 |
| C  | 18.317452000 | 27.216911000 | 19.936757000 | O             | 22.241144000 | 25.461497000 | 12.957790000 |
| H  | 16.322082000 | 27.364756000 | 19.144577000 | <b>e. TS1</b> |              |              |              |
| H  | 18.007515000 | 27.477656000 | 20.830009000 | N             | 26.376696000 | 21.899466000 | 20.399096000 |
| H  | 13.440450000 | 30.790903000 | 9.530447000  | N             | 26.788826000 | 19.949514000 | 18.389092000 |
| H  | 17.350453000 | 26.880900000 | 9.530447000  | C             | 26.670169000 | 20.633067000 | 20.748829000 |
| H  | 17.350453000 | 30.790903000 | 13.440450000 | C             | 26.426815000 | 22.860330000 | 21.329273000 |
| H  | 13.440450000 | 30.790903000 | 17.350453000 | C             | 26.789935000 | 19.006210000 | 17.428482000 |
| H  | 9.530447000  | 30.790903000 | 13.440450000 | C             | 26.654272000 | 19.580685000 | 19.684077000 |
| H  | 9.530447000  | 26.880900000 | 17.350453000 | C             | 26.989571000 | 20.313755000 | 22.079271000 |
| H  | 13.440450000 | 22.970897000 | 9.530447000  | C             | 26.724044000 | 22.638769000 | 22.686542000 |
| H  | 9.530447000  | 22.970897000 | 13.440450000 | C             | 26.704666000 | 17.631232000 | 17.678609000 |
| H  | 13.440450000 | 22.970897000 | 17.350453000 | C             | 26.507132000 | 18.222336000 | 20.009742000 |
| H  | 15.026933000 | 25.294417000 | 11.853967000 | C             | 26.996914000 | 21.312484000 | 23.044672000 |
| H  | 11.853967000 | 28.467383000 | 11.853967000 | C             | 26.549148000 | 17.252452000 | 19.018141000 |
| H  | 9.530447000  | 26.880900000 | 9.530447000  | C             | 26.809925000 | 23.730886000 | 23.728973000 |
| H  | 15.026933000 | 28.467383000 | 15.026933000 | C             | 26.809925000 | 16.592377000 | 16.590464000 |
| H  | 11.853967000 | 25.294417000 | 15.026933000 | O             | 26.880885000 | 24.934153000 | 23.334955000 |
| H  | 26.057043000 | 23.853043000 | 21.016129000 | O             | 26.880903000 | 23.334945000 | 24.934136000 |

|    |              |              |              |   |              |              |              |
|----|--------------|--------------|--------------|---|--------------|--------------|--------------|
| O  | 26.880903000 | 15.387214000 | 16.986405000 | O | 30.426944000 | 26.880866000 | 28.827595000 |
| O  | 26.880885000 | 16.986395000 | 15.387197000 | O | 30.426946000 | 28.827594000 | 26.880867000 |
| Zr | 26.878142000 | 26.881612000 | 24.237883000 | O | 24.934211000 | 26.880924000 | 30.426942000 |
| Zr | 26.878209000 | 24.239690000 | 26.880717000 | O | 26.880889000 | 24.934201000 | 30.426937000 |
| Zr | 26.878209000 | 13.440633000 | 16.081660000 | O | 26.880878000 | 28.827589000 | 30.426943000 |
| Zr | 26.878142000 | 16.083467000 | 13.439738000 | O | 28.827598000 | 26.880862000 | 30.426940000 |
| O  | 24.934203000 | 26.880849000 | 23.334882000 | O | 25.848909000 | 12.408453000 | 12.408455000 |
| O  | 25.848911000 | 25.848918000 | 25.848917000 | O | 23.334862000 | 11.493756000 | 13.440411000 |
| O  | 25.849015000 | 27.912768000 | 25.849028000 | O | 23.334855000 | 15.387135000 | 13.440484000 |
| O  | 27.912782000 | 25.849032000 | 25.849031000 | O | 23.334864000 | 13.440413000 | 11.493754000 |
| O  | 27.912889000 | 27.912886000 | 25.848919000 | O | 23.334856000 | 13.440488000 | 15.387138000 |
| O  | 26.880945000 | 28.827581000 | 23.334856000 | O | 24.934211000 | 9.894408000  | 13.440426000 |
| O  | 28.827591000 | 26.880922000 | 23.334870000 | O | 26.880889000 | 9.894413000  | 15.387149000 |
| O  | 24.934197000 | 23.334881000 | 26.880846000 | O | 27.912786000 | 12.408573000 | 12.408574000 |
| O  | 25.849012000 | 25.849025000 | 27.912771000 | O | 26.880878000 | 9.894407000  | 11.493761000 |
| O  | 27.912892000 | 25.848913000 | 27.912887000 | O | 28.827598000 | 9.894410000  | 13.440488000 |
| O  | 26.880944000 | 23.334850000 | 28.827576000 | O | 30.426944000 | 11.493755000 | 13.440484000 |
| O  | 28.827591000 | 23.334868000 | 26.880917000 | O | 30.426936000 | 15.387151000 | 13.440421000 |
| O  | 25.849012000 | 12.408579000 | 14.472325000 | O | 30.426946000 | 13.440483000 | 11.493756000 |
| O  | 25.848911000 | 14.472433000 | 14.472432000 | O | 30.426933000 | 13.440426000 | 15.387152000 |
| O  | 24.934197000 | 13.440504000 | 16.986469000 | O | 24.934210000 | 13.440425000 | 9.894409000  |
| O  | 26.880944000 | 11.493774000 | 16.986500000 | O | 26.880879000 | 11.493760000 | 9.894408000  |
| O  | 27.912892000 | 12.408463000 | 14.472437000 | O | 26.880889000 | 15.387147000 | 9.894411000  |
| O  | 27.912782000 | 14.472319000 | 14.472318000 | O | 28.827596000 | 13.440487000 | 9.894406000  |
| O  | 28.827591000 | 13.440433000 | 16.986482000 | C | 23.753697000 | 27.066116000 | 30.007949000 |
| O  | 25.849015000 | 14.472322000 | 12.408582000 | C | 23.753135000 | 30.008630000 | 27.063604000 |
| O  | 24.934203000 | 16.986468000 | 13.440501000 | C | 26.696398000 | 30.008246000 | 30.008106000 |
| O  | 27.912889000 | 14.472431000 | 12.408464000 | C | 30.007968000 | 30.008237000 | 26.695581000 |
| O  | 26.880945000 | 16.986494000 | 11.493769000 | C | 30.008286000 | 26.697416000 | 30.008420000 |
| O  | 28.827591000 | 16.986480000 | 13.440428000 | C | 23.753697000 | 10.313401000 | 13.255234000 |
| C  | 23.755332000 | 26.686089000 | 23.755213000 | C | 23.753135000 | 13.257746000 | 10.312720000 |
| Zr | 24.236612000 | 26.881475000 | 26.880552000 | C | 26.696398000 | 10.313244000 | 10.313104000 |
| Zr | 26.880671000 | 29.524609000 | 26.880680000 | C | 30.008286000 | 10.312930000 | 13.623934000 |
| Zr | 29.524440000 | 26.882357000 | 26.881381000 | C | 30.007968000 | 13.625768000 | 10.313113000 |
| C  | 27.064326000 | 30.008530000 | 23.753165000 | H | 27.351814000 | 30.759513000 | 23.002127000 |
| C  | 30.008123000 | 27.066993000 | 23.753823000 | H | 30.758179000 | 27.358190000 | 23.003211000 |
| C  | 23.755714000 | 23.756676000 | 26.684338000 | H | 23.008991000 | 23.009158000 | 26.377462000 |
| Zr | 26.880615000 | 26.881402000 | 29.524137000 | H | 27.355985000 | 23.003402000 | 30.758391000 |
| C  | 27.065914000 | 23.754135000 | 30.008060000 | H | 30.757581000 | 23.004153000 | 27.359935000 |
| C  | 30.007964000 | 23.754748000 | 27.067567000 | H | 23.008991000 | 13.943888000 | 17.312192000 |
| Zr | 24.236612000 | 13.440798000 | 13.439875000 | H | 27.355985000 | 9.562959000  | 17.317948000 |
| Zr | 26.880615000 | 10.797213000 | 13.439948000 | H | 30.757582000 | 12.961415000 | 17.317197000 |
| C  | 23.755714000 | 13.637012000 | 16.564674000 | H | 27.351814000 | 17.319223000 | 9.561837000  |
| C  | 27.065914000 | 10.313290000 | 16.567215000 | H | 30.758179000 | 17.318139000 | 12.963160000 |
| Zr | 29.524440000 | 13.439969000 | 13.438993000 | H | 23.003255000 | 27.356162000 | 30.758555000 |
| C  | 30.007964000 | 13.253783000 | 16.566602000 | H | 23.001913000 | 30.759916000 | 27.349810000 |
| Zr | 26.880671000 | 13.440670000 | 10.796741000 | H | 26.407446000 | 30.758917000 | 30.758911000 |
| C  | 23.755332000 | 16.566137000 | 13.635261000 | H | 30.758582000 | 30.758568000 | 26.405278000 |
| C  | 27.064326000 | 16.568185000 | 10.312820000 | H | 30.759373000 | 26.409850000 | 30.759355000 |
| C  | 30.008123000 | 16.567527000 | 13.254357000 | H | 23.003255000 | 9.562795000  | 12.965188000 |
| O  | 23.334855000 | 26.880866000 | 24.934215000 | H | 23.001913000 | 12.971540000 | 9.561434000  |
| O  | 23.334856000 | 24.934212000 | 26.880862000 | H | 26.407446000 | 9.562439000  | 9.562434000  |
| O  | 25.848909000 | 27.912895000 | 27.912897000 | H | 30.759373000 | 9.561995000  | 13.911500000 |
| O  | 23.334862000 | 26.880939000 | 28.827594000 | H | 30.758582000 | 13.916071000 | 9.562782000  |
| O  | 23.334864000 | 28.827596000 | 26.880937000 | H | 25.215026000 | 11.776433000 | 15.102845000 |
| O  | 24.934210000 | 30.426941000 | 26.880925000 | H | 28.544134000 | 11.776251000 | 11.775822000 |
| O  | 26.880889000 | 30.426939000 | 24.934203000 | H | 28.555271000 | 15.099035000 | 15.098322000 |
| O  | 26.880879000 | 30.426942000 | 28.827590000 | H | 25.215244000 | 15.103495000 | 11.776660000 |
| O  | 27.912786000 | 27.912776000 | 27.912777000 | H | 25.215244000 | 28.544690000 | 25.217855000 |
| O  | 28.827596000 | 30.426944000 | 26.880863000 | H | 28.555271000 | 25.223028000 | 25.222315000 |
| O  | 30.426933000 | 24.934198000 | 26.880924000 | H | 28.544134000 | 28.545528000 | 28.545099000 |
| O  | 30.426936000 | 26.880929000 | 24.934199000 | H | 25.215026000 | 25.218505000 | 28.544917000 |

## ARTICLE

## Journal Name

|    |              |              |              |    |              |              |              |
|----|--------------|--------------|--------------|----|--------------|--------------|--------------|
| O  | 14.472677000 | 25.848673000 | 14.472677000 | Zr | 13.440450000 | 26.880900000 | 10.956924000 |
| O  | 12.408223000 | 25.848673000 | 12.408223000 | O  | 11.493735000 | 26.880900000 | 9.894590000  |
| O  | 14.472677000 | 25.848673000 | 12.408223000 | O  | 15.387165000 | 26.880900000 | 9.894590000  |
| O  | 12.408223000 | 25.848673000 | 14.472677000 | O  | 12.408223000 | 27.913127000 | 12.408223000 |
| Zr | 13.440450000 | 24.397374000 | 13.440450000 | O  | 15.387165000 | 26.880900000 | 16.986310000 |
| O  | 11.493735000 | 23.335040000 | 13.440450000 | Zr | 13.440450000 | 29.364426000 | 13.440450000 |
| C  | 10.287052000 | 23.727502000 | 13.440450000 | O  | 11.493735000 | 30.426760000 | 13.440450000 |
| O  | 15.387165000 | 23.335040000 | 13.440450000 | C  | 10.287052000 | 30.034298000 | 13.440450000 |
| C  | 16.593848000 | 23.727502000 | 13.440450000 | O  | 15.387165000 | 30.426760000 | 13.440450000 |
| C  | 17.650268000 | 22.671082000 | 13.440450000 | C  | 16.593848000 | 30.034298000 | 13.440450000 |
| C  | 19.634347000 | 20.687003000 | 13.440450000 | O  | 16.986310000 | 28.827615000 | 13.440450000 |
| C  | 18.960712000 | 22.988008000 | 13.761408000 | O  | 9.894590000  | 28.827615000 | 13.440450000 |
| C  | 19.936757000 | 22.003898000 | 13.776461000 | C  | 22.671082000 | 26.880900000 | 22.671082000 |
| H  | 19.144577000 | 23.999268000 | 13.924306000 | C  | 20.687003000 | 26.880900000 | 20.687003000 |
| H  | 20.830009000 | 22.313835000 | 14.037206000 | C  | 21.360638000 | 27.201858000 | 22.988008000 |
| O  | 9.894590000  | 24.934185000 | 13.440450000 | C  | 20.384593000 | 27.216911000 | 22.003898000 |
| O  | 16.986310000 | 24.934185000 | 13.440450000 | H  | 21.176773000 | 27.364756000 | 23.999268000 |
| C  | 17.333342000 | 21.360638000 | 13.119492000 | H  | 19.491341000 | 27.477656000 | 22.313835000 |
| C  | 18.317452000 | 20.384593000 | 13.104439000 | O  | 13.440450000 | 28.827615000 | 16.986310000 |
| H  | 16.322082000 | 21.176773000 | 12.956594000 | C  | 13.440450000 | 30.034298000 | 16.593848000 |
| H  | 18.007515000 | 19.491341000 | 12.843694000 | O  | 13.440450000 | 28.827615000 | 9.894590000  |
| C  | 22.988008000 | 26.559942000 | 21.360638000 | C  | 13.440450000 | 30.034298000 | 10.287052000 |
| C  | 22.003898000 | 26.544889000 | 20.384593000 | O  | 13.440450000 | 30.426760000 | 15.387165000 |
| H  | 23.999268000 | 26.397044000 | 21.176773000 | O  | 13.440450000 | 30.426760000 | 11.493735000 |
| C  | 22.313835000 | 26.284144000 | 19.491341000 | C  | 17.333342000 | 27.201858000 | 18.960712000 |
| C  | 22.671082000 | 17.650268000 | 13.440450000 | C  | 18.317452000 | 27.216911000 | 19.936757000 |
| C  | 20.687003000 | 19.634347000 | 13.440450000 | H  | 16.322082000 | 27.364756000 | 19.144577000 |
| O  | 13.440450000 | 24.934185000 | 9.894590000  | H  | 18.007515000 | 27.477656000 | 20.830009000 |
| C  | 13.440450000 | 23.727502000 | 10.287052000 | H  | 13.440450000 | 30.790903000 | 9.530447000  |
| O  | 13.440450000 | 24.934185000 | 16.986310000 | H  | 17.350453000 | 26.880900000 | 9.530447000  |
| C  | 13.440450000 | 23.727502000 | 16.593848000 | H  | 17.350453000 | 30.790903000 | 13.440450000 |
| O  | 13.440450000 | 23.335040000 | 15.387165000 | H  | 13.440450000 | 30.790903000 | 17.350453000 |
| O  | 13.440450000 | 23.335040000 | 11.493735000 | H  | 9.530447000  | 30.790903000 | 13.440450000 |
| C  | 18.960712000 | 26.559942000 | 17.333342000 | H  | 9.530447000  | 26.880900000 | 17.350453000 |
| C  | 19.936757000 | 26.544889000 | 18.317452000 | H  | 13.440450000 | 22.970897000 | 9.530447000  |
| H  | 19.144577000 | 26.397044000 | 16.322082000 | H  | 9.530447000  | 22.970897000 | 13.440450000 |
| H  | 20.830009000 | 26.284144000 | 18.007515000 | H  | 13.440450000 | 22.970897000 | 17.350453000 |
| C  | 21.360638000 | 17.333342000 | 13.119492000 | H  | 15.026933000 | 25.294417000 | 11.853967000 |
| C  | 20.384593000 | 18.317452000 | 13.104439000 | H  | 11.853967000 | 28.467383000 | 11.853967000 |
| H  | 21.176773000 | 16.322082000 | 12.956594000 | H  | 9.530447000  | 26.880900000 | 9.530447000  |
| H  | 19.491341000 | 18.007515000 | 12.843694000 | H  | 15.026933000 | 28.467383000 | 15.026933000 |
| C  | 22.988008000 | 18.960712000 | 13.761408000 | H  | 11.853967000 | 25.294417000 | 15.026933000 |
| C  | 22.003898000 | 19.936757000 | 13.776461000 | H  | 26.209286000 | 23.868864000 | 20.978957000 |
| H  | 23.999268000 | 19.144577000 | 13.924306000 | H  | 26.848316000 | 19.386996000 | 16.413255000 |
| H  | 22.313835000 | 20.830009000 | 14.037206000 | H  | 27.257428000 | 19.299389000 | 22.359142000 |
| Zr | 10.956924000 | 26.880900000 | 13.440450000 | H  | 26.342723000 | 17.926524000 | 21.040807000 |
| O  | 9.894590000  | 26.880900000 | 11.493735000 | H  | 27.238637000 | 21.084210000 | 24.078288000 |
| O  | 12.408223000 | 27.913127000 | 14.472677000 | H  | 26.457016000 | 16.199165000 | 19.265209000 |
| C  | 10.287052000 | 26.880900000 | 10.287052000 | Cu | 26.640264000 | 21.882203000 | 17.569478000 |
| Zr | 15.923976000 | 26.880900000 | 13.440450000 | F  | 25.401520000 | 21.158109000 | 16.371355000 |
| O  | 16.986310000 | 26.880900000 | 11.493735000 | C  | 27.113283000 | 23.788889000 | 17.318219000 |
| C  | 16.593848000 | 26.880900000 | 10.287052000 | C  | 27.945365000 | 23.219127000 | 18.068841000 |
| O  | 16.986310000 | 26.880900000 | 15.387165000 | H  | 28.806241000 | 23.159008000 | 18.709487000 |
| O  | 14.472677000 | 27.913127000 | 12.408223000 | C  | 26.378977000 | 24.825753000 | 16.531944000 |
| C  | 16.593848000 | 26.880900000 | 16.593848000 | H  | 26.881655000 | 25.776761000 | 16.808309000 |
| C  | 17.650268000 | 26.880900000 | 17.650268000 | H  | 25.359944000 | 24.887669000 | 16.968678000 |
| C  | 19.634347000 | 26.880900000 | 19.634347000 | O  | 26.365566000 | 24.649411000 | 15.180138000 |
| O  | 9.894590000  | 26.880900000 | 15.387165000 | H  | 26.428901000 | 23.352186000 | 14.629400000 |
| C  | 10.287052000 | 26.880900000 | 16.593848000 | C  | 25.348277000 | 23.504834000 | 10.680130000 |
| Zr | 13.440450000 | 26.880900000 | 15.923976000 | C  | 24.568988000 | 24.215658000 | 11.785737000 |
| O  | 11.493735000 | 26.880900000 | 16.986310000 | C  | 24.415144000 | 23.412880000 | 13.100881000 |
| O  | 14.472677000 | 27.913127000 | 14.472677000 | C  | 24.721076000 | 22.210094000 | 10.166239000 |

| Journal Name  |              |              |              | ARTICLE |              |              |              |
|---------------|--------------|--------------|--------------|---------|--------------|--------------|--------------|
| C             | 25.404399000 | 22.293974000 | 13.195154000 | O       | 25.848911000 | 14.472433000 | 14.472432000 |
| C             | 24.279473000 | 21.278894000 | 11.297281000 | O       | 24.934197000 | 13.440504000 | 16.986469000 |
| N             | 25.238297000 | 21.215484000 | 12.393230000 | O       | 26.880944000 | 11.493774000 | 16.986500000 |
| H             | 25.490795000 | 24.192159000 | 9.839886000  | O       | 27.912892000 | 12.408463000 | 14.472437000 |
| H             | 25.438241000 | 21.695648000 | 9.514474000  | O       | 27.912782000 | 14.472319000 | 14.472318000 |
| C             | 27.440769000 | 21.418049000 | 14.160247000 | O       | 28.827591000 | 13.440433000 | 16.986482000 |
| N             | 26.412624000 | 22.424553000 | 14.006080000 | O       | 25.849015000 | 14.472322000 | 12.408582000 |
| C             | 26.923501000 | 20.064342000 | 13.718762000 | O       | 24.934203000 | 16.986468000 | 13.440501000 |
| C             | 26.266652000 | 20.180674000 | 12.356796000 | O       | 27.912889000 | 14.472431000 | 12.408464000 |
| H             | 25.792034000 | 19.239975000 | 12.066182000 | O       | 26.880945000 | 16.986494000 | 11.493769000 |
| H             | 27.724252000 | 21.405193000 | 15.220440000 | O       | 28.827591000 | 16.986480000 | 13.440428000 |
| H             | 26.359439000 | 23.294395000 | 11.055017000 | C       | 23.755332000 | 26.686089000 | 23.755213000 |
| H             | 23.843600000 | 22.427470000 | 9.544161000  | Zr      | 24.236612000 | 26.881475000 | 26.880552000 |
| H             | 27.015077000 | 20.418749000 | 11.581682000 | Zr      | 26.880671000 | 29.524609000 | 26.880680000 |
| H             | 28.326843000 | 21.726466000 | 13.585778000 | Zr      | 29.524440000 | 26.882357000 | 26.881381000 |
| H             | 23.576038000 | 24.505037000 | 11.420260000 | C       | 27.064326000 | 30.008530000 | 23.753165000 |
| H             | 25.100073000 | 25.142183000 | 12.021716000 | C       | 30.008123000 | 27.066993000 | 23.753823000 |
| H             | 27.726462000 | 19.321716000 | 13.685065000 | C       | 23.755714000 | 23.756676000 | 26.684338000 |
| H             | 26.181757000 | 19.742319000 | 14.457061000 | Zr      | 26.880615000 | 26.881402000 | 29.524137000 |
| H             | 24.587479000 | 24.063574000 | 13.962229000 | C       | 27.065914000 | 23.754135000 | 30.008060000 |
| H             | 23.407902000 | 22.995336000 | 13.195143000 | C       | 30.007964000 | 23.754748000 | 27.067567000 |
| H             | 23.314064000 | 21.607422000 | 11.694391000 | Zr      | 24.236612000 | 13.440798000 | 13.439875000 |
| H             | 24.130818000 | 20.255257000 | 10.939302000 | Zr      | 26.880615000 | 10.797213000 | 13.439948000 |
| C             | 28.030979000 | 25.554583000 | 14.098439000 | C       | 23.755714000 | 13.637012000 | 16.564674000 |
| O             | 28.538766000 | 26.181746000 | 14.959501000 | C       | 27.065914000 | 10.313290000 | 16.567215000 |
| O             | 27.805503000 | 25.074616000 | 13.040810000 | Zr      | 29.524440000 | 13.439969000 | 13.438993000 |
| <b>f. IM1</b> |              |              |              | C       | 30.007964000 | 13.253783000 | 16.566602000 |
| N             | 26.527769000 | 21.907811000 | 20.379973000 | Zr      | 26.880671000 | 13.440670000 | 10.796741000 |
| N             | 26.826763000 | 19.930001000 | 18.416861000 | C       | 23.755332000 | 16.566137000 | 13.635261000 |
| C             | 26.666198000 | 20.623129000 | 20.762929000 | C       | 27.064326000 | 16.568185000 | 10.312820000 |
| C             | 26.569761000 | 22.869331000 | 21.309796000 | C       | 30.008123000 | 16.567527000 | 13.254357000 |
| C             | 26.816705000 | 18.995817000 | 17.450885000 | O       | 23.334855000 | 26.880866000 | 24.934215000 |
| C             | 26.646733000 | 19.564527000 | 19.705584000 | O       | 23.334856000 | 24.934212000 | 26.880862000 |
| C             | 26.834673000 | 20.292811000 | 22.117585000 | O       | 25.848909000 | 27.912895000 | 27.912897000 |
| C             | 26.722002000 | 22.637390000 | 22.689219000 | O       | 23.334862000 | 26.880939000 | 28.827594000 |
| C             | 26.693392000 | 17.623151000 | 17.685654000 | O       | 23.334864000 | 28.827596000 | 26.880937000 |
| C             | 26.455323000 | 18.208037000 | 20.016802000 | O       | 24.934210000 | 30.426941000 | 26.880925000 |
| C             | 26.850126000 | 21.297953000 | 23.075468000 | O       | 26.880889000 | 30.426939000 | 28.824203000 |
| C             | 26.503096000 | 17.242019000 | 19.020341000 | O       | 26.880879000 | 30.426942000 | 28.827590000 |
| C             | 26.809925000 | 23.730886000 | 23.728973000 | O       | 27.912786000 | 27.912776000 | 27.912777000 |
| C             | 26.809925000 | 16.592377000 | 16.590464000 | O       | 28.827596000 | 30.426944000 | 26.880863000 |
| O             | 26.880885000 | 24.934153000 | 23.334955000 | O       | 30.426933000 | 24.934198000 | 26.880924000 |
| O             | 26.880903000 | 23.334945000 | 24.934136000 | O       | 30.426936000 | 26.880929000 | 24.934199000 |
| O             | 26.880903000 | 15.387214000 | 16.986405000 | O       | 30.426944000 | 26.880866000 | 28.827595000 |
| O             | 26.880885000 | 16.986395000 | 15.387197000 | O       | 30.426946000 | 28.827594000 | 26.880867000 |
| Zr            | 26.878142000 | 26.881612000 | 24.237883000 | O       | 24.934211000 | 26.880924000 | 30.426942000 |
| Zr            | 26.878209000 | 24.239690000 | 26.880717000 | O       | 26.880889000 | 24.934201000 | 30.426937000 |
| Zr            | 26.878209000 | 13.440633000 | 16.081660000 | O       | 26.880878000 | 28.827589000 | 30.426943000 |
| Zr            | 26.878142000 | 16.083467000 | 13.439738000 | O       | 28.827598000 | 26.880862000 | 30.426940000 |
| O             | 24.934203000 | 26.880849000 | 23.334882000 | O       | 25.848909000 | 12.408453000 | 12.408455000 |
| O             | 25.848911000 | 25.848918000 | 25.848917000 | O       | 23.334862000 | 11.493756000 | 13.440411000 |
| O             | 25.849015000 | 27.912768000 | 25.849028000 | O       | 23.334855000 | 15.387135000 | 13.440484000 |
| O             | 27.912782000 | 25.849032000 | 25.849031000 | O       | 23.334864000 | 13.440413000 | 11.493754000 |
| O             | 27.912889000 | 27.912886000 | 25.848919000 | O       | 23.334856000 | 13.440488000 | 15.387138000 |
| O             | 26.880945000 | 28.827581000 | 23.334856000 | O       | 24.934211000 | 9.894408000  | 13.440426000 |
| O             | 28.827591000 | 26.880922000 | 23.334870000 | O       | 26.880889000 | 9.894413000  | 15.387149000 |
| O             | 24.934197000 | 23.334881000 | 26.880846000 | O       | 27.912786000 | 12.408573000 | 12.408574000 |
| O             | 25.849012000 | 25.849025000 | 27.912771000 | O       | 26.880878000 | 9.894407000  | 11.493761000 |
| O             | 27.912892000 | 25.848913000 | 27.912887000 | O       | 28.827598000 | 9.894410000  | 13.440488000 |
| O             | 26.880944000 | 23.334850000 | 28.827576000 | O       | 30.426944000 | 11.493755000 | 13.440484000 |
| O             | 28.827591000 | 23.334868000 | 26.880917000 | O       | 30.426936000 | 15.387151000 | 13.440421000 |
| O             | 25.849012000 | 12.408579000 | 14.472325000 | O       | 30.426946000 | 13.440483000 | 11.493756000 |

## ARTICLE

## Journal Name

|    |              |              |              |    |              |              |              |
|----|--------------|--------------|--------------|----|--------------|--------------|--------------|
| O  | 30.426933000 | 13.440426000 | 15.387152000 | H  | 16.322082000 | 21.176773000 | 12.956594000 |
| O  | 24.934210000 | 13.440425000 | 9.894409000  | H  | 18.007515000 | 19.491341000 | 12.843694000 |
| O  | 26.880879000 | 11.493760000 | 9.894408000  | C  | 22.988008000 | 26.559942000 | 21.360638000 |
| O  | 26.880889000 | 15.387147000 | 9.894411000  | C  | 22.003898000 | 26.544889000 | 20.384593000 |
| O  | 28.827596000 | 13.440487000 | 9.894406000  | H  | 23.999268000 | 26.397044000 | 21.176773000 |
| C  | 23.753697000 | 27.066116000 | 30.007949000 | H  | 22.313835000 | 26.284144000 | 19.491341000 |
| C  | 23.753135000 | 30.008630000 | 27.063604000 | C  | 22.671082000 | 17.650268000 | 13.440450000 |
| C  | 26.696398000 | 30.008246000 | 30.008106000 | C  | 20.687003000 | 19.634347000 | 13.440450000 |
| C  | 30.007968000 | 30.008237000 | 26.695581000 | O  | 13.440450000 | 24.934185000 | 9.894590000  |
| C  | 30.008286000 | 26.697416000 | 30.008420000 | C  | 13.440450000 | 23.727502000 | 10.287052000 |
| C  | 23.753697000 | 10.313401000 | 13.255234000 | O  | 13.440450000 | 24.934185000 | 16.986310000 |
| C  | 23.753135000 | 13.257746000 | 10.312720000 | C  | 13.440450000 | 23.727502000 | 16.593848000 |
| C  | 26.696398000 | 10.313244000 | 10.313104000 | O  | 13.440450000 | 23.335040000 | 15.387165000 |
| C  | 30.008286000 | 10.312930000 | 13.623934000 | O  | 13.440450000 | 23.335040000 | 11.493735000 |
| C  | 30.007968000 | 13.625768000 | 10.313113000 | C  | 18.960712000 | 26.559942000 | 17.333342000 |
| H  | 27.351814000 | 30.759513000 | 23.002127000 | C  | 19.936757000 | 26.544889000 | 18.317452000 |
| H  | 30.758179000 | 27.358190000 | 23.003211000 | H  | 19.144577000 | 26.397044000 | 16.322082000 |
| H  | 23.008991000 | 23.009158000 | 26.377462000 | H  | 20.830009000 | 26.284144000 | 18.007515000 |
| H  | 27.355985000 | 23.003402000 | 30.758391000 | C  | 21.360638000 | 17.333342000 | 13.119492000 |
| H  | 30.757581000 | 23.004153000 | 27.359935000 | C  | 20.384593000 | 18.317452000 | 13.104439000 |
| H  | 23.008991000 | 13.943888000 | 17.312192000 | H  | 21.176773000 | 16.322082000 | 12.956594000 |
| H  | 27.355985000 | 9.562959000  | 17.317948000 | H  | 19.491341000 | 18.007515000 | 12.843694000 |
| H  | 30.757582000 | 12.961415000 | 17.317197000 | C  | 22.988008000 | 18.960712000 | 13.761408000 |
| H  | 27.351814000 | 17.319223000 | 9.561837000  | C  | 22.003898000 | 19.936757000 | 13.776461000 |
| H  | 30.758179000 | 17.318139000 | 12.963160000 | H  | 23.999268000 | 19.144577000 | 13.924306000 |
| H  | 23.003255000 | 27.356162000 | 30.758555000 | H  | 22.313835000 | 20.830009000 | 14.037206000 |
| H  | 23.001913000 | 30.759916000 | 27.349810000 | Zr | 10.956924000 | 26.880900000 | 13.440450000 |
| H  | 26.407446000 | 30.758917000 | 30.758911000 | O  | 9.894590000  | 26.880900000 | 11.493735000 |
| H  | 30.758582000 | 30.758568000 | 26.405278000 | O  | 12.408223000 | 27.913127000 | 14.472677000 |
| H  | 30.759373000 | 26.409850000 | 30.759355000 | C  | 10.287052000 | 26.880900000 | 10.287052000 |
| H  | 23.003255000 | 9.562795000  | 12.965188000 | Zr | 15.923976000 | 26.880900000 | 13.440450000 |
| H  | 23.001913000 | 12.971540000 | 9.561434000  | O  | 16.986310000 | 26.880900000 | 11.493735000 |
| H  | 26.407446000 | 9.562439000  | 9.562434000  | C  | 16.593848000 | 26.880900000 | 10.287052000 |
| H  | 30.759373000 | 9.561995000  | 13.911500000 | O  | 16.986310000 | 26.880900000 | 15.387165000 |
| H  | 30.758582000 | 13.916071000 | 9.562782000  | O  | 14.472677000 | 27.913127000 | 12.408223000 |
| H  | 25.215026000 | 11.776433000 | 15.102845000 | C  | 16.593848000 | 26.880900000 | 16.593848000 |
| H  | 28.544134000 | 11.776251000 | 11.775822000 | C  | 17.650268000 | 26.880900000 | 17.650268000 |
| H  | 28.555271000 | 15.099035000 | 15.098322000 | C  | 19.634347000 | 26.880900000 | 19.634347000 |
| H  | 25.215244000 | 15.103495000 | 11.776660000 | O  | 9.894590000  | 26.880900000 | 15.387165000 |
| H  | 25.215244000 | 28.544690000 | 25.217855000 | C  | 10.287052000 | 26.880900000 | 16.593848000 |
| H  | 28.555271000 | 25.223028000 | 25.222315000 | Zr | 13.440450000 | 26.880900000 | 15.923976000 |
| H  | 28.544134000 | 28.545528000 | 28.545099000 | O  | 11.493735000 | 26.880900000 | 16.986310000 |
| H  | 25.215026000 | 25.218505000 | 28.544917000 | O  | 14.472677000 | 27.913127000 | 14.472677000 |
| O  | 14.472677000 | 25.848673000 | 14.472677000 | Zr | 13.440450000 | 26.880900000 | 10.956924000 |
| O  | 12.408223000 | 25.848673000 | 12.408223000 | O  | 11.493735000 | 26.880900000 | 9.894590000  |
| O  | 14.472677000 | 25.848673000 | 12.408223000 | O  | 15.387165000 | 26.880900000 | 9.894590000  |
| O  | 12.408223000 | 25.848673000 | 14.472677000 | O  | 12.408223000 | 27.913127000 | 12.408223000 |
| Zr | 13.440450000 | 24.397374000 | 13.440450000 | O  | 15.387165000 | 26.880900000 | 16.986310000 |
| O  | 11.493735000 | 23.335040000 | 13.440450000 | Zr | 13.440450000 | 29.364426000 | 13.440450000 |
| C  | 10.287052000 | 23.727502000 | 13.440450000 | O  | 11.493735000 | 30.426760000 | 13.440450000 |
| O  | 15.387165000 | 23.335040000 | 13.440450000 | C  | 10.287052000 | 30.034298000 | 13.440450000 |
| C  | 16.593848000 | 23.727502000 | 13.440450000 | O  | 15.387165000 | 30.426760000 | 13.440450000 |
| C  | 17.650268000 | 22.671082000 | 13.440450000 | C  | 16.593848000 | 30.034298000 | 13.440450000 |
| C  | 19.634347000 | 20.687003000 | 13.440450000 | O  | 16.986310000 | 28.827615000 | 13.440450000 |
| C  | 18.960712000 | 22.988008000 | 13.761408000 | O  | 9.894590000  | 28.827615000 | 13.440450000 |
| C  | 19.936757000 | 22.003898000 | 13.776461000 | C  | 22.671082000 | 26.880900000 | 22.671082000 |
| H  | 19.144577000 | 23.999268000 | 13.924306000 | C  | 20.687003000 | 26.880900000 | 20.687003000 |
| H  | 20.830009000 | 22.313835000 | 14.037206000 | C  | 21.360638000 | 27.201858000 | 22.988008000 |
| O  | 9.894590000  | 24.934185000 | 13.440450000 | C  | 20.384593000 | 27.216911000 | 22.003898000 |
| O  | 16.986310000 | 24.934185000 | 13.440450000 | H  | 21.176773000 | 27.364756000 | 23.999268000 |
| C  | 17.333342000 | 21.360638000 | 13.119492000 | H  | 19.491341000 | 27.477656000 | 22.313835000 |
| C  | 18.317452000 | 20.384593000 | 13.104439000 | O  | 13.440450000 | 28.827615000 | 16.986310000 |



| Journal Name | ARTICLE      |              |              |               |               |              |              |
|--------------|--------------|--------------|--------------|---------------|---------------|--------------|--------------|
| C            | 13.440450000 | 30.034298000 | 16.593848000 | H             | 28.241708000  | 24.162651000 | 12.201229000 |
| O            | 13.440450000 | 28.827615000 | 9.894590000  | H             | 26.907510000  | 24.204982000 | 13.316337000 |
| C            | 13.440450000 | 30.034298000 | 10.287052000 | H             | 25.323668000  | 23.071295000 | 13.871048000 |
| O            | 13.440450000 | 30.426760000 | 15.387165000 | H             | 24.756541000  | 21.480331000 | 14.235794000 |
| O            | 13.440450000 | 30.426760000 | 11.493735000 | C             | 30.132389000  | 24.365335000 | 14.392622000 |
| C            | 17.333342000 | 27.201858000 | 18.960712000 | O             | 30.568947000  | 25.314230000 | 15.026966000 |
| C            | 18.317452000 | 27.216911000 | 19.936757000 | O             | 30.472125000  | 23.840291000 | 13.303406000 |
| H            | 16.322082000 | 27.364756000 | 19.144577000 | <b>g. TS2</b> |               |              |              |
| H            | 18.007515000 | 27.477656000 | 20.830009000 | N             | 26.394432000  | 21.793768000 | 20.431161000 |
| H            | 13.440450000 | 30.790903000 | 9.530447000  | N             | 26.744716000  | 19.905070000 | 18.498239000 |
| H            | 17.350453000 | 26.880900000 | 9.530447000  | C             | 26.732633000  | 20.528575000 | 20.825593000 |
| H            | 17.350453000 | 30.790903000 | 13.440450000 | C             | 26.448516000  | 22.795450000 | 21.334855000 |
| H            | 13.440450000 | 30.790903000 | 17.350453000 | C             | 26.707365000  | 18.991267000 | 17.507819000 |
| H            | 9.530447000  | 30.790903000 | 13.440450000 | C             | 26.712479000  | 19.480556000 | 19.793902000 |
| H            | 9.530447000  | 26.880900000 | 17.350453000 | C             | 27.075765000  | 20.279817000 | 22.164802000 |
| H            | 13.440450000 | 22.970897000 | 9.530447000  | C             | 26.746511000  | 22.621666000 | 22.696146000 |
| H            | 9.530447000  | 22.970897000 | 13.440450000 | C             | 26.714458000  | 17.607704000 | 17.705413000 |
| H            | 13.440450000 | 22.970897000 | 17.350453000 | C             | 26.652735000  | 18.104674000 | 20.077819000 |
| H            | 15.026933000 | 25.294417000 | 11.853967000 | C             | 27.052505000  | 21.303823000 | 23.095006000 |
| H            | 11.853967000 | 28.467383000 | 11.853967000 | C             | 26.673649000  | 17.176947000 | 19.050735000 |
| H            | 9.530447000  | 26.880900000 | 9.530447000  | C             | 26.809925000  | 23.730886000 | 23.728973000 |
| H            | 15.026933000 | 28.467383000 | 15.026933000 | C             | 26.809925000  | 16.592377000 | 16.590464000 |
| H            | 11.853967000 | 25.294417000 | 15.026933000 | O             | 26.880885000  | 24.934153000 | 23.334955000 |
| H            | 26.475490000 | 23.890155000 | 20.942057000 | O             | 26.880903000  | 23.334945000 | 24.934136000 |
| H            | 26.921028000 | 19.385859000 | 16.443789000 | O             | 26.880903000  | 15.387214000 | 16.986405000 |
| H            | 26.979511000 | 19.262434000 | 22.426846000 | O             | 26.880885000  | 16.986395000 | 15.387197000 |
| H            | 26.262234000 | 17.905222000 | 21.040532000 | Zr            | 26.878142000  | 26.881612000 | 24.237883000 |
| H            | 26.982973000 | 21.062541000 | 24.126837000 | Zr            | 26.878209000  | 24.239690000 | 26.880717000 |
| H            | 26.389073000 | 16.189420000 | 19.261117000 | Zr            | 26.878209000  | 13.440633000 | 16.081660000 |
| Cu           | 27.239565000 | 21.800914000 | 17.600965000 | Zr            | 26.878142000  | 16.083467000 | 13.439738000 |
| F            | 25.949852000 | 21.541714000 | 16.272707000 | O             | 24.934203000  | 26.880849000 | 23.334882000 |
| C            | 28.453173000 | 23.301990000 | 17.242207000 | O             | 25.848911000  | 25.848918000 | 25.848917000 |
| C            | 28.811613000 | 22.681531000 | 18.274742000 | O             | 25.849015000  | 27.912768000 | 25.849028000 |
| H            | 29.430451000 | 22.500767000 | 19.135142000 | O             | 27.912782000  | 25.849032000 | 25.849031000 |
| C            | 28.408636000 | 24.233990000 | 16.103526000 | O             | 27.912889000  | 27.912886000 | 25.848919000 |
| H            | 28.985473000 | 25.135996000 | 16.357936000 | O             | 26.880945000  | 28.827581000 | 23.334856000 |
| H            | 27.365058000 | 24.519007000 | 15.901872000 | O             | 26.8827591000 | 26.880922000 | 23.334870000 |
| O            | 28.968022000 | 23.656859000 | 14.946037000 | O             | 24.934197000  | 23.334881000 | 26.880846000 |
| H            | 29.563397000 | 22.639503000 | 12.813438000 | O             | 25.849012000  | 25.849025000 | 27.912771000 |
| C            | 25.491991000 | 22.490399000 | 10.977258000 | O             | 27.912892000  | 25.848913000 | 27.912887000 |
| C            | 26.298683000 | 23.757578000 | 11.259024000 | O             | 26.880944000  | 23.334850000 | 28.827576000 |
| C            | 27.294709000 | 23.674438000 | 12.441301000 | O             | 28.827591000  | 23.334868000 | 26.880917000 |
| C            | 24.574396000 | 22.041024000 | 12.112394000 | O             | 25.849012000  | 12.408579000 | 14.472325000 |
| C            | 27.610612000 | 22.281179000 | 12.888272000 | O             | 25.848911000  | 14.472433000 | 14.472432000 |
| C            | 25.272503000 | 22.055358000 | 13.468380000 | O             | 24.934197000  | 13.440504000 | 16.986469000 |
| N            | 26.633112000 | 21.526202000 | 13.385278000 | O             | 26.880944000  | 11.493774000 | 16.986500000 |
| H            | 24.900346000 | 22.637563000 | 10.067453000 | O             | 27.912892000  | 12.408463000 | 14.472437000 |
| H            | 24.201262000 | 21.033823000 | 11.889243000 | O             | 27.912782000  | 14.472319000 | 14.472318000 |
| C            | 29.290970000 | 20.594428000 | 13.355345000 | O             | 28.827591000  | 13.440433000 | 16.986482000 |
| N            | 28.853260000 | 21.847242000 | 12.750216000 | O             | 25.849015000  | 14.472322000 | 12.408582000 |
| C            | 28.334999000 | 20.158357000 | 14.445498000 | O             | 24.934203000  | 16.986468000 | 13.440501000 |
| C            | 26.916910000 | 20.192836000 | 13.915653000 | O             | 27.912889000  | 14.472431000 | 12.408464000 |
| H            | 26.195894000 | 20.029406000 | 14.718237000 | O             | 26.880945000  | 16.986494000 | 11.493769000 |
| H            | 30.298013000 | 20.768565000 | 13.746268000 | O             | 28.827591000  | 16.986480000 | 13.440428000 |
| H            | 26.190079000 | 21.674828000 | 10.743826000 | C             | 23.755332000  | 26.686089000 | 23.755213000 |
| H            | 23.692342000 | 22.690061000 | 12.175653000 | Zr            | 24.236612000  | 26.881475000 | 26.880552000 |
| H            | 26.762344000 | 19.439315000 | 13.127559000 | Zr            | 26.880671000  | 29.524609000 | 26.880680000 |
| H            | 29.362833000 | 19.820472000 | 12.578753000 | Zr            | 29.524440000  | 26.882357000 | 26.881381000 |
| H            | 25.615516000 | 24.597043000 | 11.434018000 | C             | 27.064326000  | 30.008530000 | 23.753165000 |
| H            | 26.856224000 | 24.011096000 | 10.351943000 | C             | 30.008123000  | 27.066993000 | 23.753823000 |
| H            | 28.579243000 | 19.150249000 | 14.789410000 | C             | 23.755714000  | 23.756676000 | 26.684338000 |
| H            | 28.402238000 | 20.854642000 | 15.292891000 | Zr            | 26.880615000  | 26.881402000 | 29.524137000 |

## ARTICLE

## Journal Name

|    |              |              |              |    |              |              |              |
|----|--------------|--------------|--------------|----|--------------|--------------|--------------|
| C  | 27.065914000 | 23.754135000 | 30.008060000 | H  | 30.757581000 | 23.004153000 | 27.359935000 |
| C  | 30.007964000 | 23.754748000 | 27.067567000 | H  | 23.008991000 | 13.943888000 | 17.312192000 |
| Zr | 24.236612000 | 13.440798000 | 13.439875000 | H  | 27.355985000 | 9.562959000  | 17.317948000 |
| Zr | 26.880615000 | 10.797213000 | 13.439948000 | H  | 30.757582000 | 12.961415000 | 17.317197000 |
| C  | 23.755714000 | 13.637012000 | 16.564674000 | H  | 27.351814000 | 17.319223000 | 9.561837000  |
| C  | 27.065914000 | 10.313290000 | 16.567215000 | H  | 30.758179000 | 17.318139000 | 12.963160000 |
| Zr | 29.524440000 | 13.439969000 | 13.438993000 | H  | 23.003255000 | 27.356162000 | 30.758555000 |
| C  | 30.007964000 | 13.253783000 | 16.566602000 | H  | 23.001913000 | 30.759916000 | 27.349810000 |
| Zr | 26.880671000 | 13.440670000 | 10.796741000 | H  | 26.407446000 | 30.758917000 | 30.758911000 |
| C  | 23.755332000 | 16.566137000 | 13.635261000 | H  | 30.758582000 | 30.758568000 | 26.405278000 |
| C  | 27.064326000 | 16.568185000 | 10.312820000 | H  | 30.759373000 | 26.409850000 | 30.759355000 |
| C  | 30.008123000 | 16.567527000 | 13.254357000 | H  | 23.003255000 | 9.562795000  | 12.965188000 |
| O  | 23.334855000 | 26.880866000 | 24.934215000 | H  | 23.001913000 | 12.971540000 | 9.561434000  |
| O  | 23.334856000 | 24.934212000 | 26.880862000 | H  | 26.407446000 | 9.562439000  | 9.562434000  |
| O  | 25.848909000 | 27.912895000 | 27.912897000 | H  | 30.759373000 | 9.561995000  | 13.911500000 |
| O  | 23.334862000 | 26.880939000 | 28.827594000 | H  | 30.758582000 | 13.916071000 | 9.562782000  |
| O  | 23.334864000 | 28.827596000 | 26.880937000 | H  | 25.215026000 | 11.776433000 | 15.102845000 |
| O  | 24.934210000 | 30.426941000 | 26.880925000 | H  | 28.544134000 | 11.776251000 | 11.775822000 |
| O  | 26.880889000 | 30.426939000 | 24.934203000 | H  | 28.555271000 | 15.099035000 | 15.098322000 |
| O  | 26.880879000 | 30.426942000 | 28.827590000 | H  | 25.215244000 | 15.103495000 | 11.776660000 |
| O  | 27.912786000 | 27.912776000 | 27.912777000 | H  | 25.215244000 | 28.544690000 | 25.217855000 |
| O  | 28.827596000 | 30.426944000 | 26.880863000 | H  | 28.555271000 | 25.223028000 | 25.222315000 |
| O  | 30.426933000 | 24.934198000 | 26.880924000 | H  | 28.544134000 | 28.545528000 | 28.545099000 |
| O  | 30.426936000 | 26.880929000 | 24.934199000 | H  | 25.215026000 | 25.218505000 | 28.544917000 |
| O  | 30.426944000 | 26.880866000 | 28.827595000 | O  | 14.472677000 | 25.848673000 | 14.472677000 |
| O  | 30.426946000 | 28.827594000 | 26.880867000 | O  | 12.408223000 | 25.848673000 | 12.408223000 |
| O  | 24.934211000 | 26.880924000 | 30.426942000 | O  | 14.472677000 | 25.848673000 | 12.408223000 |
| O  | 26.880889000 | 24.934201000 | 30.426937000 | O  | 12.408223000 | 25.848673000 | 14.472677000 |
| O  | 26.880878000 | 28.827589000 | 30.426943000 | Zr | 13.440450000 | 24.397374000 | 13.440450000 |
| O  | 28.827598000 | 26.880862000 | 30.426940000 | O  | 11.493735000 | 23.335040000 | 13.440450000 |
| O  | 25.848909000 | 12.408453000 | 12.408455000 | C  | 10.287052000 | 23.727502000 | 13.440450000 |
| O  | 23.334862000 | 11.493756000 | 13.440411000 | O  | 15.387165000 | 23.335040000 | 13.440450000 |
| O  | 23.334855000 | 15.387135000 | 13.440484000 | C  | 16.593848000 | 23.727502000 | 13.440450000 |
| O  | 23.334864000 | 13.440413000 | 11.493754000 | C  | 17.650268000 | 22.671082000 | 13.440450000 |
| O  | 23.334856000 | 13.440488000 | 15.387138000 | C  | 19.634347000 | 20.687003000 | 13.440450000 |
| O  | 24.934211000 | 9.894408000  | 13.440426000 | C  | 18.960712000 | 22.988008000 | 13.761408000 |
| O  | 26.880889000 | 9.894413000  | 15.387149000 | C  | 19.936757000 | 22.003898000 | 13.776461000 |
| O  | 27.912786000 | 12.408573000 | 12.408574000 | H  | 19.144577000 | 23.999268000 | 13.924306000 |
| O  | 26.880878000 | 9.894407000  | 11.493761000 | H  | 20.830009000 | 22.313835000 | 14.037206000 |
| O  | 28.827598000 | 9.894410000  | 13.440488000 | O  | 9.894590000  | 24.934185000 | 13.440450000 |
| O  | 30.426944000 | 11.493755000 | 13.440484000 | O  | 16.986310000 | 24.934185000 | 13.440450000 |
| O  | 30.426936000 | 15.387151000 | 13.440421000 | C  | 17.333342000 | 21.360638000 | 13.119492000 |
| O  | 30.426946000 | 13.440483000 | 11.493756000 | C  | 18.317452000 | 20.384593000 | 13.104439000 |
| O  | 30.426933000 | 13.440426000 | 15.387152000 | H  | 16.322082000 | 21.176773000 | 12.956594000 |
| O  | 24.934210000 | 13.440425000 | 9.894409000  | H  | 18.007515000 | 19.491341000 | 12.843694000 |
| O  | 26.880879000 | 11.493760000 | 9.894408000  | C  | 22.988008000 | 26.559942000 | 21.360638000 |
| O  | 26.880889000 | 15.387147000 | 9.894411000  | C  | 22.003898000 | 26.544889000 | 20.384593000 |
| O  | 28.827596000 | 13.440487000 | 9.894406000  | H  | 23.999268000 | 26.397044000 | 21.176773000 |
| C  | 23.753697000 | 27.066116000 | 30.007949000 | H  | 22.313835000 | 26.284144000 | 19.491341000 |
| C  | 23.753135000 | 30.008630000 | 27.063604000 | C  | 22.671082000 | 17.650268000 | 13.440450000 |
| C  | 26.696398000 | 30.008246000 | 30.008106000 | C  | 20.687003000 | 19.634347000 | 13.440450000 |
| C  | 30.007968000 | 30.008237000 | 26.695581000 | O  | 13.440450000 | 24.934185000 | 9.894590000  |
| C  | 30.008286000 | 26.697416000 | 30.008420000 | C  | 13.440450000 | 23.727502000 | 10.287052000 |
| C  | 23.753697000 | 10.313401000 | 13.255234000 | O  | 13.440450000 | 24.934185000 | 16.986310000 |
| C  | 23.753135000 | 13.257746000 | 10.312720000 | C  | 13.440450000 | 23.727502000 | 16.593848000 |
| C  | 26.696398000 | 10.313244000 | 10.313104000 | O  | 13.440450000 | 23.335040000 | 15.387165000 |
| C  | 30.008286000 | 10.312930000 | 13.623934000 | O  | 13.440450000 | 23.335040000 | 11.493735000 |
| C  | 30.007968000 | 13.625768000 | 10.313113000 | C  | 18.960712000 | 26.559942000 | 17.333342000 |
| H  | 27.351814000 | 30.759513000 | 23.002127000 | C  | 19.936757000 | 26.544889000 | 18.317452000 |
| H  | 30.758179000 | 27.358190000 | 23.003211000 | H  | 19.144577000 | 26.397044000 | 16.322082000 |
| H  | 23.008991000 | 23.009158000 | 26.377462000 | H  | 20.830009000 | 26.284144000 | 18.007515000 |
| H  | 27.355985000 | 23.003402000 | 30.758391000 | C  | 21.360638000 | 17.333342000 | 13.119492000 |

| Journal Name |              |              |              | ARTICLE       |              |              |              |
|--------------|--------------|--------------|--------------|---------------|--------------|--------------|--------------|
| C            | 20.384593000 | 18.317452000 | 13.104439000 | H             | 11.853967000 | 28.467383000 | 11.853967000 |
| H            | 21.176773000 | 16.322082000 | 12.956594000 | H             | 9.530447000  | 26.880900000 | 9.530447000  |
| H            | 19.491341000 | 18.007515000 | 12.843694000 | H             | 15.026933000 | 28.467383000 | 15.026933000 |
| C            | 22.988008000 | 18.960712000 | 13.761408000 | H             | 11.853967000 | 25.294417000 | 15.026933000 |
| C            | 22.003898000 | 19.936757000 | 13.776461000 | H             | 26.215523000 | 23.784974000 | 20.945241000 |
| H            | 23.999268000 | 19.144577000 | 13.924306000 | H             | 26.695678000 | 19.394145000 | 16.500061000 |
| H            | 22.313835000 | 20.830009000 | 14.037206000 | H             | 27.379832000 | 19.282384000 | 22.468969000 |
| Zr           | 10.956924000 | 26.880900000 | 13.440450000 | H             | 26.571647000 | 17.766506000 | 21.106929000 |
| O            | 9.894590000  | 26.880900000 | 11.493735000 | H             | 27.303255000 | 21.114949000 | 24.133605000 |
| O            | 12.408223000 | 27.913127000 | 14.472677000 | H             | 26.647769000 | 16.113622000 | 19.263596000 |
| C            | 10.287052000 | 26.880900000 | 10.287052000 | Cu            | 26.057703000 | 21.860595000 | 18.287117000 |
| Zr           | 15.923976000 | 26.880900000 | 13.440450000 | F             | 24.721180000 | 21.170758000 | 17.070887000 |
| O            | 16.986310000 | 26.880900000 | 11.493735000 | C             | 25.561858000 | 24.081948000 | 16.890196000 |
| C            | 16.593848000 | 26.880900000 | 10.287052000 | C             | 26.547847000 | 23.690116000 | 17.590139000 |
| O            | 16.986310000 | 26.880900000 | 15.387165000 | H             | 27.548503000 | 24.095541000 | 17.655839000 |
| O            | 14.472677000 | 27.913127000 | 12.408223000 | C             | 24.163756000 | 23.968564000 | 16.489330000 |
| C            | 16.593848000 | 26.880900000 | 16.593848000 | H             | 23.568356000 | 24.792916000 | 16.905352000 |
| C            | 17.650268000 | 26.880900000 | 17.650268000 | H             | 23.792682000 | 22.997513000 | 16.840430000 |
| C            | 19.634347000 | 26.880900000 | 19.634347000 | O             | 24.069918000 | 23.984257000 | 15.067565000 |
| O            | 9.894590000  | 26.880900000 | 15.387165000 | H             | 24.677976000 | 22.472662000 | 14.364521000 |
| C            | 10.287052000 | 26.880900000 | 16.593848000 | C             | 25.742840000 | 23.357420000 | 10.447103000 |
| Zr           | 13.440450000 | 26.880900000 | 15.923976000 | C             | 24.263593000 | 23.325567000 | 10.818168000 |
| O            | 11.493735000 | 26.880900000 | 16.986310000 | C             | 23.894986000 | 22.333135000 | 11.951103000 |
| O            | 14.472677000 | 27.913127000 | 14.472677000 | C             | 26.224618000 | 22.098377000 | 9.728453000  |
| Zr           | 13.440450000 | 26.880900000 | 10.956924000 | C             | 25.066424000 | 21.642425000 | 12.579134000 |
| O            | 11.493735000 | 26.880900000 | 9.894590000  | C             | 25.691563000 | 20.830496000 | 10.388750000 |
| O            | 15.387165000 | 26.880900000 | 9.894590000  | N             | 25.858494000 | 20.850624000 | 11.839041000 |
| O            | 12.408223000 | 27.913127000 | 12.408223000 | H             | 25.939796000 | 24.231067000 | 9.818931000  |
| O            | 15.387165000 | 26.880900000 | 16.986310000 | H             | 27.320748000 | 22.075942000 | 9.697295000  |
| Zr           | 13.440450000 | 29.364426000 | 13.440450000 | C             | 26.415083000 | 21.264638000 | 14.599275000 |
| O            | 11.493735000 | 30.426760000 | 13.440450000 | N             | 25.286601000 | 21.812228000 | 13.860721000 |
| C            | 10.287052000 | 30.034298000 | 13.440450000 | C             | 26.972152000 | 20.055303000 | 13.876046000 |
| O            | 15.387165000 | 30.426760000 | 13.440450000 | C             | 27.113573000 | 20.330557000 | 12.391170000 |
| C            | 16.593848000 | 30.034298000 | 13.440450000 | H             | 27.350580000 | 19.410377000 | 11.848655000 |
| O            | 16.986310000 | 28.827615000 | 13.440450000 | H             | 26.017668000 | 21.042937000 | 15.599660000 |
| O            | 9.894590000  | 28.827615000 | 13.440450000 | H             | 26.320558000 | 23.529765000 | 11.364490000 |
| C            | 22.671082000 | 26.880900000 | 22.671082000 | H             | 25.886620000 | 22.098425000 | 8.684676000  |
| C            | 20.687003000 | 26.880900000 | 20.687003000 | H             | 27.916899000 | 21.058083000 | 12.200355000 |
| C            | 21.360638000 | 27.201858000 | 22.988008000 | H             | 27.168898000 | 22.057223000 | 14.705313000 |
| C            | 20.384593000 | 27.216911000 | 22.003898000 | H             | 23.661898000 | 23.098508000 | 9.928821000  |
| H            | 21.176773000 | 27.364756000 | 23.999268000 | H             | 23.983838000 | 24.321019000 | 11.163985000 |
| H            | 19.491341000 | 27.477656000 | 22.313835000 | H             | 27.945446000 | 19.778858000 | 14.290098000 |
| O            | 13.440450000 | 28.827615000 | 16.986310000 | H             | 26.317043000 | 19.190843000 | 14.024292000 |
| C            | 13.440450000 | 30.034298000 | 16.593848000 | H             | 23.378337000 | 22.871404000 | 12.748582000 |
| O            | 13.440450000 | 28.827615000 | 9.894590000  | H             | 23.211033000 | 21.557843000 | 11.584125000 |
| C            | 13.440450000 | 30.034298000 | 10.287052000 | H             | 24.626322000 | 20.705145000 | 10.167438000 |
| O            | 13.440450000 | 30.426760000 | 15.387165000 | H             | 26.192705000 | 19.930408000 | 10.020446000 |
| O            | 13.440450000 | 30.426760000 | 11.493735000 | C             | 25.081489000 | 24.842348000 | 14.493453000 |
| C            | 17.333342000 | 27.201858000 | 18.960712000 | O             | 25.824324000 | 25.380732000 | 15.359196000 |
| C            | 18.317452000 | 27.216911000 | 19.936757000 | O             | 25.076222000 | 24.865829000 | 13.268476000 |
| H            | 16.322082000 | 27.364756000 | 19.144577000 | <b>h. IM2</b> |              |              |              |
| H            | 18.007515000 | 27.477656000 | 20.830009000 | N             | 26.835380000 | 21.812678000 | 20.417014000 |
| H            | 13.440450000 | 30.790903000 | 9.530447000  | N             | 26.650536000 | 19.913728000 | 18.498532000 |
| H            | 17.350453000 | 26.880900000 | 9.530447000  | C             | 26.642388000 | 20.526337000 | 20.835701000 |
| H            | 17.350453000 | 30.790903000 | 13.440450000 | C             | 26.818349000 | 22.814341000 | 21.319500000 |
| H            | 13.440450000 | 30.790903000 | 17.350453000 | C             | 26.713946000 | 18.996026000 | 17.511641000 |
| H            | 9.530447000  | 30.790903000 | 13.440450000 | C             | 26.677982000 | 19.487148000 | 19.799854000 |
| H            | 9.530447000  | 26.880900000 | 17.350453000 | C             | 26.450613000 | 20.264442000 | 22.205335000 |
| H            | 13.440450000 | 22.970897000 | 9.530447000  | C             | 26.693877000 | 22.626456000 | 22.703010000 |
| H            | 9.530447000  | 22.970897000 | 13.440450000 | C             | 26.738567000 | 17.611238000 | 17.704676000 |
| H            | 13.440450000 | 22.970897000 | 17.350453000 | C             | 26.759936000 | 18.109768000 | 20.078057000 |
| H            | 15.026933000 | 25.294417000 | 11.853967000 | C             | 26.502872000 | 21.293059000 | 23.128275000 |

## ARTICLE

## Journal Name

|    |              |              |              |   |              |              |               |
|----|--------------|--------------|--------------|---|--------------|--------------|---------------|
| C  | 26.765990000 | 17.182305000 | 19.052683000 | O | 26.880879000 | 30.426942000 | 28.827590000  |
| C  | 26.809925000 | 23.730886000 | 23.728973000 | O | 27.912786000 | 27.912776000 | 27.912777000  |
| C  | 26.809925000 | 16.592377000 | 16.590464000 | O | 28.827596000 | 30.426944000 | 26.880863000  |
| O  | 26.880885000 | 24.934153000 | 23.334955000 | O | 30.426933000 | 24.934198000 | 26.880924000  |
| O  | 26.880903000 | 23.334945000 | 24.934136000 | O | 30.426936000 | 26.880929000 | 24.934199000  |
| O  | 26.880903000 | 15.387214000 | 16.986405000 | O | 30.426944000 | 26.880866000 | 28.827595000  |
| O  | 26.880885000 | 16.986395000 | 15.387197000 | O | 30.426946000 | 28.827594000 | 26.880867000  |
| Zr | 26.878142000 | 26.881612000 | 24.237883000 | O | 24.934211000 | 26.880924000 | 30.426942000  |
| Zr | 26.878209000 | 24.239690000 | 26.880717000 | O | 26.880889000 | 24.934201000 | 30.426937000  |
| Zr | 26.878209000 | 13.440633000 | 16.081660000 | O | 26.880878000 | 28.827589000 | 30.426943000  |
| Zr | 26.878142000 | 16.083467000 | 13.439738000 | O | 28.827598000 | 26.880862000 | 30.426940000  |
| O  | 24.934203000 | 26.880849000 | 23.334882000 | O | 25.848909000 | 12.408453000 | 12.408455000  |
| O  | 25.848911000 | 25.848918000 | 25.848917000 | O | 23.334862000 | 11.493756000 | 13.440411000  |
| O  | 25.849015000 | 27.912768000 | 25.849028000 | O | 23.334855000 | 15.387135000 | 13.440484000  |
| O  | 27.912782000 | 25.849032000 | 25.849031000 | O | 23.334864000 | 13.440413000 | 11.493754000  |
| O  | 27.912889000 | 27.912886000 | 25.848919000 | O | 23.334856000 | 13.440488000 | 15.387138000  |
| O  | 26.880945000 | 28.827581000 | 23.334856000 | O | 24.934211000 | 9.894408000  | 13.440426000  |
| O  | 28.827591000 | 26.880922000 | 23.334870000 | O | 26.880889000 | 9.894413000  | 15.387149000  |
| O  | 24.934197000 | 23.334881000 | 26.880846000 | O | 27.912786000 | 12.408573000 | 12.408574000  |
| O  | 25.849012000 | 25.849025000 | 27.912771000 | O | 26.880878000 | 9.894407000  | 11.493761000  |
| O  | 27.912892000 | 25.848913000 | 27.912887000 | O | 28.827598000 | 9.894410000  | 13.440488000  |
| O  | 26.880944000 | 23.334850000 | 28.827576000 | O | 30.426944000 | 11.493755000 | 13.440484000  |
| O  | 28.827591000 | 23.334868000 | 26.880917000 | O | 30.426936000 | 15.387151000 | 13.440421000  |
| O  | 25.849012000 | 12.408579000 | 14.472325000 | O | 30.426946000 | 13.440483000 | 11.493756000  |
| O  | 25.848911000 | 14.472433000 | 14.472432000 | O | 30.426933000 | 13.440426000 | 15.387152000  |
| O  | 24.934197000 | 13.440504000 | 16.986469000 | O | 24.934210000 | 13.440425000 | 9.894409000   |
| O  | 26.880944000 | 11.493774000 | 16.986500000 | O | 26.880879000 | 11.493760000 | 9.894408000   |
| O  | 27.912892000 | 12.408463000 | 14.472437000 | O | 26.880889000 | 15.387147000 | 9.894411000   |
| O  | 27.912782000 | 14.472319000 | 14.472318000 | O | 28.827596000 | 13.440487000 | 9.894406000   |
| O  | 28.827591000 | 13.440433000 | 16.986482000 | C | 23.753697000 | 27.066116000 | 30.007949000  |
| O  | 25.849015000 | 14.472322000 | 12.408582000 | C | 23.753135000 | 30.008630000 | 27.063604000  |
| O  | 24.934203000 | 16.986468000 | 13.440501000 | C | 26.696398000 | 30.008246000 | 30.008106000  |
| O  | 27.912889000 | 14.472431000 | 12.408464000 | C | 30.007968000 | 30.008237000 | 26.695581000  |
| O  | 26.880945000 | 16.986494000 | 11.493769000 | C | 30.008286000 | 26.697416000 | 30.008420000  |
| O  | 28.827591000 | 16.986480000 | 13.440428000 | C | 23.753697000 | 10.313401000 | 13.255234000  |
| C  | 23.755332000 | 26.686089000 | 23.755213000 | C | 23.753135000 | 13.257746000 | 10.312720000  |
| Zr | 24.236612000 | 26.881475000 | 26.880552000 | C | 26.696398000 | 10.313244000 | 10.313104000  |
| Zr | 26.880671000 | 29.524609000 | 26.880680000 | C | 30.008286000 | 10.312930000 | 10.3123934000 |
| Zr | 29.524440000 | 26.882357000 | 26.881381000 | C | 30.007968000 | 13.625768000 | 10.313113000  |
| C  | 27.064326000 | 30.008530000 | 23.753165000 | H | 27.351814000 | 30.759513000 | 23.002127000  |
| C  | 30.008123000 | 27.066993000 | 23.753823000 | H | 30.758179000 | 27.358190000 | 23.003211000  |
| C  | 23.755714000 | 23.756676000 | 26.684338000 | H | 23.008991000 | 23.009158000 | 26.377462000  |
| Zr | 26.880615000 | 26.881402000 | 29.524137000 | H | 27.355985000 | 23.003402000 | 30.758391000  |
| C  | 27.065914000 | 23.754135000 | 30.008060000 | H | 30.757581000 | 23.004153000 | 27.359935000  |
| C  | 30.007964000 | 23.754748000 | 27.067567000 | H | 23.008991000 | 13.943888000 | 17.312192000  |
| Zr | 24.236612000 | 13.440798000 | 13.439875000 | H | 27.355985000 | 9.562959000  | 17.317948000  |
| Zr | 26.880615000 | 10.797213000 | 13.439948000 | H | 30.757582000 | 12.961415000 | 17.317197000  |
| C  | 23.755714000 | 13.637012000 | 16.564674000 | H | 27.351814000 | 17.319223000 | 9.561837000   |
| C  | 27.065914000 | 10.313290000 | 16.567215000 | H | 30.758179000 | 17.318139000 | 12.963160000  |
| Zr | 29.524440000 | 13.439969000 | 13.438993000 | H | 23.003255000 | 27.356162000 | 30.758555000  |
| C  | 30.007964000 | 13.253783000 | 16.566602000 | H | 23.001913000 | 30.759916000 | 27.349810000  |
| Zr | 26.880671000 | 13.440670000 | 10.796741000 | H | 26.407446000 | 30.758917000 | 30.758911000  |
| C  | 23.755332000 | 16.566137000 | 13.635261000 | H | 30.758582000 | 30.758568000 | 26.405278000  |
| C  | 27.064326000 | 16.568185000 | 10.312820000 | H | 30.759373000 | 26.409850000 | 30.759355000  |
| C  | 30.008123000 | 16.567527000 | 13.254357000 | H | 23.003255000 | 9.562795000  | 12.965188000  |
| O  | 23.334855000 | 26.880866000 | 24.934215000 | H | 23.001913000 | 12.971540000 | 9.561434000   |
| O  | 23.334856000 | 24.934212000 | 26.880862000 | H | 26.407446000 | 9.562439000  | 9.562434000   |
| O  | 25.848909000 | 27.912895000 | 27.912897000 | H | 30.759373000 | 9.561995000  | 13.911500000  |
| O  | 23.334862000 | 26.880939000 | 28.827594000 | H | 30.758582000 | 13.916071000 | 9.562782000   |
| O  | 23.334864000 | 28.827596000 | 26.880937000 | H | 25.215026000 | 11.776433000 | 15.102845000  |
| O  | 24.934210000 | 30.426941000 | 26.880925000 | H | 28.544134000 | 11.776251000 | 11.775822000  |
| O  | 26.880889000 | 30.426939000 | 24.934203000 | H | 28.555271000 | 15.099035000 | 15.098322000  |

|    |              |              |              |    |              |              |              |
|----|--------------|--------------|--------------|----|--------------|--------------|--------------|
| H  | 25.215244000 | 15.103495000 | 11.776660000 | O  | 9.894590000  | 26.880900000 | 15.387165000 |
| H  | 25.215244000 | 28.544690000 | 25.217855000 | C  | 10.287052000 | 26.880900000 | 16.593848000 |
| H  | 28.555271000 | 25.223028000 | 25.222315000 | Zr | 13.440450000 | 26.880900000 | 15.923976000 |
| H  | 28.544134000 | 28.545528000 | 28.545099000 | O  | 11.493735000 | 26.880900000 | 16.986310000 |
| H  | 25.215026000 | 25.218505000 | 28.544917000 | O  | 14.472677000 | 27.913127000 | 14.472677000 |
| O  | 14.472677000 | 25.848673000 | 14.472677000 | Zr | 13.440450000 | 26.880900000 | 10.956924000 |
| O  | 12.408223000 | 25.848673000 | 12.408223000 | O  | 11.493735000 | 26.880900000 | 9.894590000  |
| O  | 14.472677000 | 25.848673000 | 12.408223000 | O  | 15.387165000 | 26.880900000 | 9.894590000  |
| O  | 12.408223000 | 25.848673000 | 14.472677000 | O  | 12.408223000 | 27.913127000 | 12.408223000 |
| Zr | 13.440450000 | 24.397374000 | 13.440450000 | O  | 15.387165000 | 26.880900000 | 16.986310000 |
| O  | 11.493735000 | 23.335040000 | 13.440450000 | Zr | 13.440450000 | 29.364426000 | 13.440450000 |
| C  | 10.287052000 | 23.727502000 | 13.440450000 | O  | 11.493735000 | 30.426760000 | 13.440450000 |
| O  | 15.387165000 | 23.335040000 | 13.440450000 | C  | 10.287052000 | 30.034298000 | 13.440450000 |
| C  | 16.593848000 | 23.727502000 | 13.440450000 | O  | 15.387165000 | 30.426760000 | 13.440450000 |
| C  | 17.650268000 | 22.671082000 | 13.440450000 | C  | 16.593848000 | 30.034298000 | 13.440450000 |
| C  | 19.634347000 | 20.687003000 | 13.440450000 | O  | 16.986310000 | 28.827615000 | 13.440450000 |
| C  | 18.960712000 | 22.988008000 | 13.761408000 | O  | 9.894590000  | 28.827615000 | 13.440450000 |
| C  | 19.936757000 | 22.003898000 | 13.776461000 | C  | 22.671082000 | 26.880900000 | 22.671082000 |
| H  | 19.144577000 | 23.999268000 | 13.924306000 | C  | 20.687003000 | 26.880900000 | 20.687003000 |
| H  | 20.830009000 | 22.313835000 | 14.037206000 | C  | 21.360638000 | 27.201858000 | 22.988008000 |
| O  | 9.894590000  | 24.934185000 | 13.440450000 | C  | 20.384593000 | 27.216911000 | 22.003898000 |
| O  | 16.986310000 | 24.934185000 | 13.440450000 | H  | 21.176773000 | 27.364756000 | 23.999268000 |
| C  | 17.333342000 | 21.360638000 | 13.119492000 | H  | 19.491341000 | 27.477656000 | 22.313835000 |
| C  | 18.317452000 | 20.384593000 | 13.104439000 | O  | 13.440450000 | 28.827615000 | 16.986310000 |
| H  | 16.322082000 | 21.176773000 | 12.956594000 | C  | 13.440450000 | 30.034298000 | 16.593848000 |
| H  | 18.007515000 | 19.491341000 | 12.843694000 | O  | 13.440450000 | 28.827615000 | 9.894590000  |
| C  | 22.988008000 | 26.559942000 | 21.360638000 | C  | 13.440450000 | 30.034298000 | 10.287052000 |
| C  | 22.003898000 | 26.544889000 | 20.384593000 | O  | 13.440450000 | 30.426760000 | 15.387165000 |
| H  | 23.999268000 | 26.397044000 | 21.176773000 | O  | 13.440450000 | 30.426760000 | 11.493735000 |
| H  | 22.313835000 | 26.284144000 | 19.491341000 | C  | 17.333342000 | 27.201858000 | 18.960712000 |
| C  | 22.671082000 | 17.650268000 | 13.440450000 | C  | 18.317452000 | 27.216911000 | 19.936757000 |
| C  | 20.687003000 | 19.634347000 | 13.440450000 | H  | 16.322082000 | 27.364756000 | 19.144577000 |
| O  | 13.440450000 | 24.934185000 | 9.894590000  | H  | 18.007515000 | 27.477656000 | 20.830009000 |
| C  | 13.440450000 | 23.727502000 | 10.287052000 | H  | 13.440450000 | 30.790903000 | 9.530447000  |
| O  | 13.440450000 | 24.934185000 | 16.986310000 | H  | 17.350453000 | 26.880900000 | 9.530447000  |
| C  | 13.440450000 | 23.727502000 | 16.593848000 | H  | 17.350453000 | 30.790903000 | 13.440450000 |
| O  | 13.440450000 | 23.335040000 | 15.387165000 | H  | 13.440450000 | 30.790903000 | 17.350453000 |
| O  | 13.440450000 | 23.335040000 | 11.493735000 | H  | 9.530447000  | 30.790903000 | 13.440450000 |
| C  | 18.960712000 | 26.559942000 | 17.333342000 | H  | 9.530447000  | 26.880900000 | 17.350453000 |
| C  | 19.936757000 | 26.544889000 | 18.317452000 | H  | 13.440450000 | 22.970897000 | 9.530447000  |
| H  | 19.144577000 | 26.397044000 | 16.322082000 | H  | 9.530447000  | 22.970897000 | 13.440450000 |
| H  | 20.830009000 | 26.284144000 | 18.007515000 | H  | 13.440450000 | 22.970897000 | 17.350453000 |
| C  | 21.360638000 | 17.333342000 | 13.119492000 | H  | 15.026933000 | 25.294417000 | 11.853967000 |
| C  | 20.384593000 | 18.317452000 | 13.104439000 | H  | 11.853967000 | 28.467383000 | 11.853967000 |
| H  | 21.176773000 | 16.322082000 | 12.956594000 | H  | 9.530447000  | 26.880900000 | 9.530447000  |
| H  | 19.491341000 | 18.007515000 | 12.843694000 | H  | 15.026933000 | 28.467383000 | 15.026933000 |
| C  | 22.988008000 | 18.960712000 | 13.761408000 | H  | 11.853967000 | 25.294417000 | 15.026933000 |
| C  | 22.003898000 | 19.936757000 | 13.776461000 | H  | 26.937374000 | 23.813576000 | 20.905347000 |
| H  | 23.999268000 | 19.144577000 | 13.924306000 | H  | 26.741176000 | 19.398377000 | 16.499588000 |
| H  | 22.313835000 | 20.830009000 | 14.037206000 | H  | 26.257523000 | 19.250700000 | 22.543939000 |
| Zr | 10.956924000 | 26.880900000 | 13.440450000 | H  | 26.835161000 | 17.768203000 | 21.106410000 |
| O  | 9.894590000  | 26.880900000 | 11.493735000 | H  | 26.389364000 | 21.091665000 | 24.188504000 |
| O  | 12.408223000 | 27.913127000 | 14.472677000 | H  | 26.822873000 | 16.120339000 | 19.265401000 |
| C  | 10.287052000 | 26.880900000 | 10.287052000 | Cu | 27.038124000 | 22.032823000 | 18.351930000 |
| Zr | 15.923976000 | 26.880900000 | 13.440450000 | F  | 25.750159000 | 23.536644000 | 18.224036000 |
| O  | 16.986310000 | 26.880900000 | 11.493735000 | C  | 28.895207000 | 23.586415000 | 16.938962000 |
| C  | 16.593848000 | 26.880900000 | 10.287052000 | C  | 28.388459000 | 22.353986000 | 16.982303000 |
| O  | 16.986310000 | 26.880900000 | 15.387165000 | H  | 28.766318000 | 21.661322000 | 16.220697000 |
| O  | 14.472677000 | 27.913127000 | 12.408223000 | C  | 28.666415000 | 24.729609000 | 17.874649000 |
| C  | 16.593848000 | 26.880900000 | 16.593848000 | H  | 29.264198000 | 24.648845000 | 18.794202000 |
| C  | 17.650268000 | 26.880900000 | 17.650268000 | H  | 27.611614000 | 24.844497000 | 18.146154000 |
| C  | 19.634347000 | 26.880900000 | 19.634347000 | O  | 29.132469000 | 25.875227000 | 17.136668000 |

## ARTICLE

## Journal Name

|               |              |              |              |    |              |              |              |
|---------------|--------------|--------------|--------------|----|--------------|--------------|--------------|
| H             | 26.813169000 | 23.030804000 | 15.608406000 | O  | 25.849012000 | 25.849025000 | 27.912771000 |
| C             | 23.757583000 | 26.089690000 | 14.609133000 | O  | 27.912892000 | 25.848913000 | 27.912887000 |
| C             | 25.228314000 | 26.255184000 | 14.977968000 | O  | 26.880944000 | 23.334850000 | 28.827576000 |
| C             | 25.696918000 | 25.313787000 | 16.098140000 | O  | 28.827591000 | 23.334868000 | 26.880917000 |
| C             | 22.800454000 | 26.048677000 | 15.795475000 | O  | 25.849012000 | 12.408579000 | 14.472325000 |
| C             | 25.099882000 | 23.953271000 | 15.984685000 | O  | 25.848911000 | 14.472433000 | 14.472432000 |
| C             | 23.033961000 | 24.891003000 | 16.784250000 | O  | 24.934197000 | 13.440504000 | 16.986469000 |
| N             | 23.799598000 | 23.771652000 | 16.233324000 | O  | 26.880944000 | 11.493774000 | 16.986500000 |
| H             | 23.457199000 | 26.901316000 | 13.938922000 | O  | 27.912892000 | 12.408463000 | 14.472437000 |
| H             | 21.778366000 | 25.985902000 | 15.407252000 | O  | 27.912782000 | 14.472319000 | 14.472318000 |
| C             | 25.231408000 | 21.667678000 | 15.231811000 | O  | 28.827591000 | 13.440433000 | 16.986482000 |
| N             | 25.810146000 | 22.990178000 | 15.403039000 | O  | 25.849015000 | 14.472322000 | 12.408582000 |
| C             | 24.329808000 | 21.354601000 | 16.411835000 | O  | 24.934203000 | 16.986468000 | 13.440501000 |
| C             | 23.282035000 | 22.435847000 | 16.567684000 | O  | 27.912889000 | 14.472431000 | 12.408464000 |
| H             | 22.949399000 | 22.476768000 | 17.611162000 | O  | 26.880945000 | 16.986494000 | 11.493769000 |
| H             | 26.052519000 | 20.953118000 | 15.140522000 | O  | 28.827591000 | 16.986480000 | 13.440428000 |
| H             | 23.632768000 | 25.166254000 | 14.029113000 | C  | 23.755332000 | 26.686089000 | 23.755213000 |
| H             | 22.853760000 | 26.991865000 | 16.352021000 | Zr | 24.236612000 | 26.881475000 | 26.880552000 |
| H             | 22.396217000 | 22.255782000 | 15.947897000 | Zr | 26.880671000 | 29.524609000 | 26.880680000 |
| H             | 24.675152000 | 21.649925000 | 14.285570000 | Zr | 29.524440000 | 26.882357000 | 26.881381000 |
| H             | 25.427842000 | 27.282630000 | 15.300322000 | C  | 27.064326000 | 30.008530000 | 23.753165000 |
| H             | 25.839705000 | 26.090652000 | 14.084408000 | C  | 30.008123000 | 27.066993000 | 23.753823000 |
| H             | 23.848613000 | 20.379870000 | 16.294663000 | C  | 23.755714000 | 23.756676000 | 26.684338000 |
| H             | 24.948473000 | 21.319543000 | 17.314760000 | Zr | 26.880615000 | 26.881402000 | 29.524137000 |
| H             | 26.784683000 | 25.214266000 | 16.078590000 | C  | 27.065914000 | 23.754135000 | 30.008060000 |
| H             | 25.445973000 | 25.706754000 | 17.085585000 | C  | 30.007964000 | 23.754748000 | 27.067567000 |
| H             | 23.538195000 | 25.219726000 | 17.700662000 | Zr | 24.236612000 | 13.440798000 | 13.439875000 |
| H             | 22.076388000 | 24.467447000 | 17.094471000 | Zr | 26.880615000 | 10.797213000 | 13.439948000 |
| C             | 29.869482000 | 25.444644000 | 16.081452000 | C  | 23.755714000 | 13.637012000 | 16.564674000 |
| O             | 29.808543000 | 24.092129000 | 15.974957000 | C  | 27.065914000 | 10.313290000 | 16.567215000 |
| O             | 30.471304000 | 26.164539000 | 15.335656000 | Zr | 29.524440000 | 13.439969000 | 13.438993000 |
| <b>i. TS3</b> |              |              |              | C  | 30.007964000 | 13.253783000 | 16.566602000 |
| N             | 26.890062000 | 21.792702000 | 20.435547000 | Zr | 26.880671000 | 13.440670000 | 10.796741000 |
| N             | 26.606831000 | 19.919951000 | 18.490518000 | C  | 23.755332000 | 16.566137000 | 13.635261000 |
| C             | 26.596606000 | 20.524932000 | 20.840111000 | C  | 27.064326000 | 16.568185000 | 10.312820000 |
| C             | 26.858482000 | 22.807074000 | 21.320657000 | C  | 30.008123000 | 16.567527000 | 13.254357000 |
| C             | 26.695617000 | 19.000196000 | 17.502870000 | O  | 23.334855000 | 26.880866000 | 24.934215000 |
| C             | 26.624943000 | 19.490811000 | 19.796679000 | O  | 23.334856000 | 24.934212000 | 26.880862000 |
| C             | 26.301679000 | 20.281536000 | 22.193779000 | O  | 25.848909000 | 27.912895000 | 27.912897000 |
| C             | 26.671268000 | 22.629317000 | 22.699570000 | O  | 23.334862000 | 26.880939000 | 28.827594000 |
| C             | 26.712262000 | 17.615241000 | 17.702101000 | O  | 23.334864000 | 28.827596000 | 26.880937000 |
| C             | 26.677793000 | 18.114937000 | 20.073144000 | O  | 24.934210000 | 30.426941000 | 26.880925000 |
| C             | 26.382172000 | 21.311975000 | 23.116024000 | O  | 26.880889000 | 30.426939000 | 24.934203000 |
| C             | 26.697014000 | 17.186195000 | 19.047837000 | O  | 26.880879000 | 30.426942000 | 28.827590000 |
| C             | 26.809925000 | 23.730886000 | 23.728973000 | O  | 27.912786000 | 27.912776000 | 27.912777000 |
| C             | 26.809925000 | 16.592377000 | 16.590464000 | O  | 28.827596000 | 30.426944000 | 26.880863000 |
| O             | 26.880885000 | 24.934153000 | 23.334955000 | O  | 30.426933000 | 24.934198000 | 26.880924000 |
| O             | 26.880903000 | 23.334945000 | 24.934136000 | O  | 30.426936000 | 26.880929000 | 24.934199000 |
| O             | 26.880903000 | 15.387214000 | 16.986405000 | O  | 30.426944000 | 26.880866000 | 28.827595000 |
| O             | 26.880885000 | 16.986395000 | 15.387197000 | O  | 30.426946000 | 28.827594000 | 26.880867000 |
| Zr            | 26.878142000 | 26.881612000 | 24.237883000 | O  | 24.934211000 | 26.880924000 | 30.426942000 |
| Zr            | 26.878209000 | 24.239690000 | 26.880717000 | O  | 26.880889000 | 24.934201000 | 30.426937000 |
| Zr            | 26.878209000 | 13.440633000 | 16.081660000 | O  | 26.880878000 | 28.827589000 | 30.426943000 |
| Zr            | 26.878142000 | 16.083467000 | 13.439738000 | O  | 28.827598000 | 26.880862000 | 30.426940000 |
| O             | 24.934203000 | 26.880849000 | 23.334882000 | O  | 25.848909000 | 12.408453000 | 12.408455000 |
| O             | 25.848911000 | 25.848918000 | 25.848917000 | O  | 23.334862000 | 11.493756000 | 13.440411000 |
| O             | 25.849015000 | 27.912768000 | 25.849028000 | O  | 23.334855000 | 15.387135000 | 13.440484000 |
| O             | 27.912782000 | 25.849032000 | 25.849031000 | O  | 23.334864000 | 13.440413000 | 11.493754000 |
| O             | 27.912889000 | 27.912886000 | 25.848919000 | O  | 23.334856000 | 13.440488000 | 15.387138000 |
| O             | 26.880945000 | 28.827581000 | 23.334856000 | O  | 24.934211000 | 9.894408000  | 13.440426000 |
| O             | 28.827591000 | 26.880922000 | 23.334870000 | O  | 26.880889000 | 9.894413000  | 15.387149000 |
| O             | 24.934197000 | 23.334881000 | 26.880846000 | O  | 27.912786000 | 12.408573000 | 12.408574000 |

| Journal Name | ARTICLE      |              |              |    |              |              |              |
|--------------|--------------|--------------|--------------|----|--------------|--------------|--------------|
| O            | 26.880878000 | 9.894407000  | 11.493761000 | H  | 20.830009000 | 22.313835000 | 14.037206000 |
| O            | 28.827598000 | 9.894410000  | 13.440488000 | O  | 9.894590000  | 24.934185000 | 13.440450000 |
| O            | 30.426944000 | 11.493755000 | 13.440484000 | O  | 16.986310000 | 24.934185000 | 13.440450000 |
| O            | 30.426936000 | 15.387151000 | 13.440421000 | C  | 17.333342000 | 21.360638000 | 13.119492000 |
| O            | 30.426946000 | 13.440483000 | 11.493756000 | C  | 18.317452000 | 20.384593000 | 13.104439000 |
| O            | 30.426933000 | 13.440426000 | 15.387152000 | H  | 16.322082000 | 21.176773000 | 12.956594000 |
| O            | 24.934210000 | 13.440425000 | 9.894409000  | H  | 18.007515000 | 19.491341000 | 12.843694000 |
| O            | 26.880879000 | 11.493760000 | 9.894408000  | C  | 22.988008000 | 26.559942000 | 21.360638000 |
| O            | 26.880889000 | 15.387147000 | 9.894411000  | C  | 22.003898000 | 26.544889000 | 20.384593000 |
| O            | 28.827596000 | 13.440487000 | 9.894406000  | H  | 23.999268000 | 26.397044000 | 21.176773000 |
| C            | 23.753697000 | 27.066116000 | 30.007949000 | H  | 22.313835000 | 26.284144000 | 19.491341000 |
| C            | 23.753135000 | 30.008630000 | 27.063604000 | C  | 22.671082000 | 17.650268000 | 13.440450000 |
| C            | 26.696398000 | 30.008246000 | 30.008106000 | C  | 20.687003000 | 19.634347000 | 13.440450000 |
| C            | 30.007968000 | 30.008237000 | 26.695581000 | O  | 13.440450000 | 24.934185000 | 9.894590000  |
| C            | 30.008286000 | 26.697416000 | 30.008420000 | C  | 13.440450000 | 23.727502000 | 10.287052000 |
| C            | 23.753697000 | 10.313401000 | 13.255234000 | O  | 13.440450000 | 24.934185000 | 16.986310000 |
| C            | 23.753135000 | 13.257746000 | 10.312720000 | C  | 13.440450000 | 23.727502000 | 16.593848000 |
| C            | 26.696398000 | 10.313244000 | 10.313104000 | O  | 13.440450000 | 23.335040000 | 15.387165000 |
| C            | 30.008286000 | 10.312930000 | 13.623934000 | O  | 13.440450000 | 23.335040000 | 11.493735000 |
| C            | 30.007968000 | 13.625768000 | 10.313113000 | C  | 18.960712000 | 26.559942000 | 17.333342000 |
| H            | 27.351814000 | 30.759513000 | 23.002127000 | C  | 19.936757000 | 26.544889000 | 18.317452000 |
| H            | 30.758179000 | 27.358190000 | 23.003211000 | H  | 19.144577000 | 26.397044000 | 16.322082000 |
| H            | 23.008991000 | 23.009158000 | 26.377462000 | H  | 20.830009000 | 26.284144000 | 18.007515000 |
| H            | 27.355985000 | 23.003402000 | 30.758391000 | C  | 21.360638000 | 17.333342000 | 13.119492000 |
| H            | 30.757581000 | 23.004153000 | 27.359935000 | C  | 20.384593000 | 18.317452000 | 13.104439000 |
| H            | 23.008991000 | 13.943888000 | 17.312192000 | H  | 21.176773000 | 16.322082000 | 12.956594000 |
| H            | 27.355985000 | 9.562959000  | 17.317948000 | H  | 19.491341000 | 18.007515000 | 12.843694000 |
| H            | 30.757582000 | 12.961415000 | 17.317197000 | C  | 22.988008000 | 18.960712000 | 13.761408000 |
| H            | 27.351814000 | 17.319223000 | 9.561837000  | C  | 22.003898000 | 19.936757000 | 13.776461000 |
| H            | 30.758179000 | 17.318139000 | 12.963160000 | H  | 23.999268000 | 19.144577000 | 13.924306000 |
| H            | 23.003255000 | 27.356162000 | 30.758555000 | H  | 22.313835000 | 20.830009000 | 14.037206000 |
| H            | 23.001913000 | 30.759916000 | 27.349810000 | Zr | 10.956924000 | 26.880900000 | 13.440450000 |
| H            | 26.407446000 | 30.758917000 | 30.758911000 | O  | 9.894590000  | 26.880900000 | 11.493735000 |
| H            | 30.758582000 | 30.758568000 | 26.405278000 | O  | 12.408223000 | 27.913127000 | 14.472677000 |
| H            | 30.759373000 | 26.409850000 | 30.759355000 | C  | 10.287052000 | 26.880900000 | 10.287052000 |
| H            | 23.003255000 | 9.562795000  | 12.965188000 | Zr | 15.923976000 | 26.880900000 | 13.440450000 |
| H            | 23.001913000 | 12.971540000 | 9.561434000  | O  | 16.986310000 | 26.880900000 | 11.493735000 |
| H            | 26.407446000 | 9.562439000  | 9.562434000  | C  | 16.593848000 | 26.880900000 | 10.287052000 |
| H            | 30.759373000 | 9.561995000  | 13.911500000 | O  | 16.986310000 | 26.880900000 | 15.387165000 |
| H            | 30.758582000 | 13.916071000 | 9.562782000  | O  | 14.472677000 | 27.913127000 | 12.408223000 |
| H            | 25.215026000 | 11.776433000 | 15.102845000 | C  | 16.593848000 | 26.880900000 | 16.593848000 |
| H            | 28.544134000 | 11.776251000 | 11.775822000 | C  | 17.650268000 | 26.880900000 | 17.650268000 |
| H            | 28.555271000 | 15.099035000 | 15.098322000 | C  | 19.634347000 | 26.880900000 | 19.634347000 |
| H            | 25.215244000 | 15.103495000 | 11.776660000 | O  | 9.894590000  | 26.880900000 | 15.387165000 |
| H            | 25.215244000 | 28.544690000 | 25.217855000 | C  | 10.287052000 | 26.880900000 | 16.593848000 |
| H            | 28.555271000 | 25.223028000 | 25.222315000 | Zr | 13.440450000 | 26.880900000 | 15.923976000 |
| H            | 28.544134000 | 28.545528000 | 28.545099000 | O  | 11.493735000 | 26.880900000 | 16.986310000 |
| H            | 25.215026000 | 25.218505000 | 28.544917000 | O  | 14.472677000 | 27.913127000 | 14.472677000 |
| O            | 14.472677000 | 25.848673000 | 14.472677000 | Zr | 13.440450000 | 26.880900000 | 10.956924000 |
| O            | 12.408223000 | 25.848673000 | 12.408223000 | O  | 11.493735000 | 26.880900000 | 9.894590000  |
| O            | 14.472677000 | 25.848673000 | 12.408223000 | O  | 15.387165000 | 26.880900000 | 9.894590000  |
| O            | 12.408223000 | 25.848673000 | 14.472677000 | O  | 12.408223000 | 27.913127000 | 12.408223000 |
| Zr           | 13.440450000 | 24.397374000 | 13.440450000 | O  | 15.387165000 | 26.880900000 | 16.986310000 |
| O            | 11.493735000 | 23.335040000 | 13.440450000 | Zr | 13.440450000 | 29.364426000 | 13.440450000 |
| C            | 10.287052000 | 23.727502000 | 13.440450000 | O  | 11.493735000 | 30.426760000 | 13.440450000 |
| O            | 15.387165000 | 23.335040000 | 13.440450000 | C  | 10.287052000 | 30.034298000 | 13.440450000 |
| C            | 16.593848000 | 23.727502000 | 13.440450000 | O  | 15.387165000 | 30.426760000 | 13.440450000 |
| C            | 17.650268000 | 22.671082000 | 13.440450000 | C  | 16.593848000 | 30.034298000 | 13.440450000 |
| C            | 19.634347000 | 20.687003000 | 13.440450000 | O  | 16.986310000 | 28.827615000 | 13.440450000 |
| C            | 18.960712000 | 22.988008000 | 13.761408000 | O  | 9.894590000  | 28.827615000 | 13.440450000 |
| C            | 19.936757000 | 22.003898000 | 13.776461000 | C  | 22.671082000 | 26.880900000 | 22.671082000 |
| H            | 19.144577000 | 23.999268000 | 13.924306000 | C  | 20.687003000 | 26.880900000 | 20.687003000 |

## ARTICLE

## Journal Name

|    |              |              |              |                  |              |              |              |
|----|--------------|--------------|--------------|------------------|--------------|--------------|--------------|
| C  | 21.360638000 | 27.201858000 | 22.988008000 | H                | 24.612490000 | 21.715204000 | 14.567503000 |
| C  | 20.384593000 | 27.216911000 | 22.003898000 | H                | 26.357889000 | 27.383164000 | 15.068013000 |
| H  | 21.176773000 | 27.364756000 | 23.999268000 | H                | 26.964255000 | 26.227809000 | 13.904773000 |
| H  | 19.491341000 | 27.477656000 | 22.313835000 | H                | 23.151196000 | 21.309510000 | 16.548434000 |
| O  | 13.440450000 | 28.827615000 | 16.986310000 | H                | 24.303944000 | 22.184947000 | 17.578186000 |
| C  | 13.440450000 | 30.034298000 | 16.593848000 | H                | 27.457437000 | 24.907616000 | 15.709165000 |
| O  | 13.440450000 | 28.827615000 | 9.894590000  | H                | 26.439293000 | 25.821973000 | 16.803154000 |
| C  | 13.440450000 | 30.034298000 | 10.287052000 | H                | 24.482529000 | 26.413568000 | 16.943338000 |
| O  | 13.440450000 | 30.426760000 | 15.387165000 | H                | 22.824065000 | 25.880322000 | 16.820156000 |
| O  | 13.440450000 | 30.426760000 | 11.493735000 | C                | 31.220338000 | 23.529213000 | 17.710276000 |
| C  | 17.333342000 | 27.201858000 | 18.960712000 | O                | 30.444921000 | 22.519933000 | 17.199174000 |
| C  | 18.317452000 | 27.216911000 | 19.936757000 | O                | 32.415235000 | 23.510512000 | 17.738870000 |
| H  | 16.322082000 | 27.364756000 | 19.144577000 | <b>j. PC/DBU</b> |              |              |              |
| H  | 18.007515000 | 27.477656000 | 20.830009000 | N                | 26.726074000 | 21.888948000 | 20.393148000 |
| H  | 13.440450000 | 30.790903000 | 9.530447000  | N                | 26.505034000 | 19.932356000 | 18.435208000 |
| H  | 17.350453000 | 26.880900000 | 9.530447000  | C                | 26.602725000 | 20.594284000 | 20.778165000 |
| H  | 17.350453000 | 30.790903000 | 13.440450000 | C                | 26.746502000 | 22.857747000 | 21.324387000 |
| H  | 13.440450000 | 30.790903000 | 17.350453000 | C                | 26.558055000 | 19.009789000 | 17.465048000 |
| H  | 9.530447000  | 30.790903000 | 13.440450000 | C                | 26.627900000 | 19.538870000 | 19.721034000 |
| H  | 9.530447000  | 26.880900000 | 17.350453000 | C                | 26.493244000 | 20.287084000 | 22.142368000 |
| H  | 13.440450000 | 22.970897000 | 9.530447000  | C                | 26.685105000 | 22.629110000 | 22.702469000 |
| H  | 9.530447000  | 22.970897000 | 13.440450000 | C                | 26.715344000 | 17.630106000 | 17.688212000 |
| H  | 13.440450000 | 22.970897000 | 17.350453000 | C                | 26.811376000 | 18.185700000 | 20.039665000 |
| H  | 15.026933000 | 25.294417000 | 11.853967000 | C                | 26.553584000 | 21.291756000 | 23.098282000 |
| H  | 11.853967000 | 28.467383000 | 11.853967000 | C                | 26.844497000 | 17.237487000 | 19.026717000 |
| H  | 9.530447000  | 26.880900000 | 9.530447000  | C                | 26.809932000 | 23.730853000 | 23.728958000 |
| H  | 15.026933000 | 28.467383000 | 15.026933000 | C                | 26.809917000 | 16.592419000 | 16.590473000 |
| H  | 11.853967000 | 25.294417000 | 15.026933000 | O                | 26.880881000 | 24.934154000 | 23.334956000 |
| H  | 27.011167000 | 23.794386000 | 20.888582000 | O                | 26.880908000 | 23.334959000 | 24.934140000 |
| H  | 26.748220000 | 19.401421000 | 16.491950000 | O                | 26.880899000 | 15.387217000 | 16.986414000 |
| H  | 26.006216000 | 19.288393000 | 22.520062000 | O                | 26.880891000 | 16.986368000 | 15.387189000 |
| H  | 26.731783000 | 17.777943000 | 21.104257000 | Zr               | 26.878141000 | 26.881612000 | 24.237883000 |
| H  | 26.205024000 | 21.123790000 | 24.170320000 | Zr               | 26.878204000 | 24.239690000 | 26.880717000 |
| H  | 26.736863000 | 16.123585000 | 19.261146000 | Zr               | 26.878213000 | 13.440633000 | 16.081660000 |
| Cu | 26.896651000 | 21.946819000 | 18.334846000 | Zr               | 26.878141000 | 16.083467000 | 13.439738000 |
| F  | 26.310272000 | 23.755477000 | 18.386032000 | O                | 24.934203000 | 26.880849000 | 23.334882000 |
| C  | 29.099818000 | 22.883027000 | 17.235766000 | O                | 25.848911000 | 25.848918000 | 25.848917000 |
| C  | 28.134146000 | 22.161155000 | 16.632379000 | O                | 25.849015000 | 27.912768000 | 25.849028000 |
| H  | 28.536075000 | 21.281086000 | 16.119825000 | O                | 27.912782000 | 25.849032000 | 25.849031000 |
| C  | 29.058648000 | 24.133661000 | 18.068628000 | O                | 27.912889000 | 27.912886000 | 25.848919000 |
| H  | 28.690368000 | 23.948354000 | 19.083533000 | O                | 26.880945000 | 28.827581000 | 23.334856000 |
| H  | 28.459634000 | 24.941725000 | 17.649348000 | O                | 28.827591000 | 26.880922000 | 23.334870000 |
| O  | 30.437568000 | 24.533189000 | 18.148592000 | O                | 24.934197000 | 23.334881000 | 26.880846000 |
| H  | 27.050667000 | 22.671801000 | 16.084810000 | O                | 25.849012000 | 25.849025000 | 27.912771000 |
| C  | 24.831906000 | 26.272235000 | 14.019880000 | O                | 27.912892000 | 25.848913000 | 27.912887000 |
| C  | 26.205985000 | 26.367971000 | 14.681170000 | O                | 26.880944000 | 23.334850000 | 28.827576000 |
| C  | 26.463342000 | 25.346804000 | 15.817467000 | O                | 28.827591000 | 23.334868000 | 26.880917000 |
| C  | 23.661311000 | 26.593018000 | 14.944449000 | O                | 25.849012000 | 12.408579000 | 14.472325000 |
| C  | 25.493293000 | 24.204417000 | 15.846809000 | O                | 25.848911000 | 14.472433000 | 14.472432000 |
| C  | 23.779913000 | 25.882312000 | 16.292428000 | O                | 24.934197000 | 13.440504000 | 16.986469000 |
| N  | 24.209121000 | 24.497086000 | 16.170720000 | O                | 26.880944000 | 11.493774000 | 16.986500000 |
| H  | 24.799861000 | 26.934620000 | 13.148527000 | O                | 27.912892000 | 12.408463000 | 14.472437000 |
| H  | 22.721073000 | 26.315716000 | 14.452078000 | O                | 27.912782000 | 14.472319000 | 14.472318000 |
| C  | 25.006758000 | 21.897852000 | 15.577073000 | O                | 28.827591000 | 13.440433000 | 16.986482000 |
| N  | 25.934018000 | 23.015139000 | 15.534942000 | O                | 25.849015000 | 14.472322000 | 12.408582000 |
| C  | 23.879187000 | 22.126085000 | 16.567333000 | O                | 24.934203000 | 16.986468000 | 13.440501000 |
| C  | 23.206705000 | 23.444629000 | 16.246531000 | O                | 27.912889000 | 14.472431000 | 12.408464000 |
| H  | 22.486730000 | 23.721634000 | 17.025022000 | O                | 26.880945000 | 16.986494000 | 11.493769000 |
| H  | 25.585137000 | 21.003479000 | 15.846962000 | O                | 28.827591000 | 16.986480000 | 13.440428000 |
| H  | 24.705182000 | 25.255788000 | 13.623007000 | C                | 23.755332000 | 26.686089000 | 23.755213000 |
| H  | 23.605146000 | 27.672676000 | 15.131506000 | Zr               | 24.236612000 | 26.881475000 | 26.880552000 |
| H  | 22.648256000 | 23.383618000 | 15.298374000 | Zr               | 26.880671000 | 29.524609000 | 26.880680000 |



| Journal Name |              |              |              | ARTICLE |              |              |              |
|--------------|--------------|--------------|--------------|---------|--------------|--------------|--------------|
| Zr           | 29.524440000 | 26.882357000 | 26.881381000 | C       | 30.007968000 | 13.625768000 | 10.313113000 |
| C            | 27.064326000 | 30.008530000 | 23.753165000 | H       | 27.351814000 | 30.759513000 | 23.002127000 |
| C            | 30.008123000 | 27.066993000 | 23.753823000 | H       | 30.758179000 | 27.358190000 | 23.003211000 |
| C            | 23.755714000 | 23.756676000 | 26.684338000 | H       | 23.008991000 | 23.009158000 | 26.377462000 |
| Zr           | 26.880615000 | 26.881402000 | 29.524137000 | H       | 27.355985000 | 23.003402000 | 30.758391000 |
| C            | 27.065914000 | 23.754135000 | 30.008060000 | H       | 30.757581000 | 23.004153000 | 27.359935000 |
| C            | 30.007964000 | 23.754748000 | 27.067567000 | H       | 23.008991000 | 13.943888000 | 17.312192000 |
| Zr           | 24.236612000 | 13.440798000 | 13.439875000 | H       | 27.355985000 | 9.562959000  | 17.317948000 |
| Zr           | 26.880615000 | 10.797213000 | 13.439948000 | H       | 30.757582000 | 12.961415000 | 17.317197000 |
| C            | 23.755714000 | 13.637012000 | 16.564674000 | H       | 27.351814000 | 17.319223000 | 9.561837000  |
| C            | 27.065914000 | 10.313290000 | 16.567215000 | H       | 30.758179000 | 17.318139000 | 12.963160000 |
| Zr           | 29.524440000 | 13.439969000 | 13.438993000 | H       | 23.003255000 | 27.356162000 | 30.758555000 |
| C            | 30.007964000 | 13.253783000 | 16.566602000 | H       | 23.001913000 | 30.759916000 | 27.349810000 |
| Zr           | 26.880671000 | 13.440670000 | 10.796741000 | H       | 26.407446000 | 30.758917000 | 30.758911000 |
| C            | 23.755332000 | 16.566137000 | 13.635261000 | H       | 30.758582000 | 30.758588000 | 26.405278000 |
| C            | 27.064326000 | 16.568185000 | 10.312820000 | H       | 30.759373000 | 26.409850000 | 30.759355000 |
| C            | 30.008123000 | 16.567527000 | 13.254357000 | H       | 23.003255000 | 9.562795000  | 12.965188000 |
| O            | 23.334855000 | 26.880866000 | 24.934215000 | H       | 23.001913000 | 12.971540000 | 9.561434000  |
| O            | 23.334856000 | 24.934212000 | 26.880862000 | H       | 26.407446000 | 9.562439000  | 9.562434000  |
| O            | 25.848909000 | 27.912895000 | 27.912897000 | H       | 30.759373000 | 9.561995000  | 13.911500000 |
| O            | 23.334862000 | 26.880939000 | 28.827594000 | H       | 30.758582000 | 13.916071000 | 9.562782000  |
| O            | 23.334864000 | 28.827596000 | 26.880937000 | H       | 25.215026000 | 11.776433000 | 15.102845000 |
| O            | 24.934210000 | 30.426941000 | 26.880925000 | H       | 28.544134000 | 11.776251000 | 11.775822000 |
| O            | 26.880889000 | 30.426939000 | 24.934203000 | H       | 28.555271000 | 15.099035000 | 15.098322000 |
| O            | 26.880879000 | 30.426942000 | 28.827590000 | H       | 25.215244000 | 15.103495000 | 11.776660000 |
| O            | 27.912786000 | 27.912776000 | 27.912777000 | H       | 25.215244000 | 28.544690000 | 25.217855000 |
| O            | 28.827596000 | 30.426944000 | 26.880863000 | H       | 28.555271000 | 25.223028000 | 25.222315000 |
| O            | 30.426933000 | 24.934198000 | 26.880924000 | H       | 28.544134000 | 28.545528000 | 28.545099000 |
| O            | 30.426936000 | 26.880929000 | 24.934199000 | H       | 25.215026000 | 25.218505000 | 28.544917000 |
| O            | 30.426944000 | 26.880866000 | 28.827595000 | O       | 14.472677000 | 25.848673000 | 14.472677000 |
| O            | 30.426946000 | 28.827594000 | 26.880867000 | O       | 12.408223000 | 25.848673000 | 12.408223000 |
| O            | 24.934211000 | 26.880924000 | 30.426942000 | O       | 14.472677000 | 25.848673000 | 12.408223000 |
| O            | 26.880889000 | 24.934201000 | 30.426937000 | O       | 12.408223000 | 25.848673000 | 14.472677000 |
| O            | 26.880878000 | 28.827589000 | 30.426943000 | Zr      | 13.440450000 | 24.397374000 | 13.440450000 |
| O            | 28.827598000 | 26.880862000 | 30.426940000 | O       | 11.493735000 | 23.335040000 | 13.440450000 |
| O            | 25.848909000 | 12.408453000 | 12.408455000 | C       | 10.287052000 | 23.727502000 | 13.440450000 |
| O            | 23.334862000 | 11.493756000 | 13.440411000 | O       | 15.387165000 | 23.335040000 | 13.440450000 |
| O            | 23.334855000 | 15.387135000 | 13.440484000 | C       | 16.593848000 | 23.727502000 | 13.440450000 |
| O            | 23.334864000 | 13.440413000 | 11.493754000 | C       | 17.650268000 | 22.671082000 | 13.440450000 |
| O            | 23.334856000 | 13.440488000 | 15.387138000 | C       | 19.634347000 | 20.687003000 | 13.440450000 |
| O            | 24.934211000 | 9.894408000  | 13.440426000 | C       | 18.960712000 | 22.988008000 | 13.761408000 |
| O            | 26.880889000 | 9.894413000  | 15.387149000 | C       | 19.936757000 | 22.003898000 | 13.776461000 |
| O            | 27.912786000 | 12.408573000 | 12.408574000 | H       | 19.144577000 | 23.999268000 | 13.924306000 |
| O            | 26.880878000 | 9.894407000  | 11.493761000 | H       | 20.830009000 | 22.313835000 | 14.037206000 |
| O            | 28.827598000 | 9.894410000  | 13.440488000 | O       | 9.894590000  | 24.934185000 | 13.440450000 |
| O            | 30.426944000 | 11.493755000 | 13.440484000 | O       | 16.986310000 | 24.934185000 | 13.440450000 |
| O            | 30.426936000 | 15.387151000 | 13.440421000 | C       | 17.333342000 | 21.360638000 | 13.119492000 |
| O            | 30.426946000 | 13.440483000 | 11.493756000 | C       | 18.317452000 | 20.384593000 | 13.104439000 |
| O            | 30.426933000 | 13.440426000 | 15.387152000 | H       | 16.322082000 | 21.176773000 | 12.956594000 |
| O            | 24.934210000 | 13.440425000 | 9.894409000  | H       | 18.007515000 | 19.491341000 | 12.843694000 |
| O            | 26.880879000 | 11.493760000 | 9.894408000  | C       | 22.988008000 | 26.559942000 | 21.360638000 |
| O            | 26.880889000 | 15.387147000 | 9.894411000  | C       | 22.003898000 | 26.544889000 | 20.384593000 |
| O            | 28.827596000 | 13.440487000 | 9.894406000  | H       | 23.999268000 | 26.397044000 | 21.176773000 |
| C            | 23.753697000 | 27.066116000 | 30.007949000 | H       | 22.313835000 | 26.284144000 | 19.491341000 |
| C            | 23.753135000 | 30.008630000 | 27.063604000 | C       | 22.671082000 | 17.650268000 | 13.440450000 |
| C            | 26.696398000 | 30.008246000 | 30.008106000 | C       | 20.687003000 | 19.634347000 | 13.440450000 |
| C            | 30.007968000 | 30.008237000 | 26.695581000 | O       | 13.440450000 | 24.934185000 | 9.894590000  |
| C            | 30.008286000 | 26.697416000 | 30.008420000 | C       | 13.440450000 | 23.727502000 | 10.287052000 |
| C            | 23.753697000 | 10.313401000 | 13.255234000 | O       | 13.440450000 | 24.934185000 | 16.986310000 |
| C            | 23.753135000 | 13.257746000 | 10.312720000 | C       | 13.440450000 | 23.727502000 | 16.593848000 |
| C            | 26.696398000 | 10.313244000 | 10.313104000 | O       | 13.440450000 | 23.335040000 | 15.387165000 |
| C            | 30.008286000 | 10.312930000 | 13.623934000 | O       | 13.440450000 | 23.335040000 | 11.493735000 |

## ARTICLE

## Journal Name

|    |              |              |              |              |              |              |              |
|----|--------------|--------------|--------------|--------------|--------------|--------------|--------------|
| C  | 18.960712000 | 26.559942000 | 17.333342000 | H            | 9.530447000  | 26.880900000 | 17.350453000 |
| C  | 19.936757000 | 26.544889000 | 18.317452000 | H            | 13.440450000 | 22.970897000 | 9.530447000  |
| H  | 19.144577000 | 26.397044000 | 16.322082000 | H            | 9.530447000  | 22.970897000 | 13.440450000 |
| H  | 20.830009000 | 26.284144000 | 18.007515000 | H            | 13.440450000 | 22.970897000 | 17.350453000 |
| C  | 21.360638000 | 17.333342000 | 13.119492000 | H            | 15.026933000 | 25.294417000 | 11.853967000 |
| C  | 20.384593000 | 18.317452000 | 13.104439000 | H            | 11.853967000 | 28.467383000 | 11.853967000 |
| H  | 21.176773000 | 16.322082000 | 12.956594000 | H            | 9.530447000  | 26.880900000 | 9.530447000  |
| H  | 19.491341000 | 18.007515000 | 12.843694000 | H            | 15.026933000 | 28.467383000 | 15.026933000 |
| C  | 22.988008000 | 18.960712000 | 13.761408000 | H            | 11.853967000 | 25.294417000 | 15.026933000 |
| C  | 22.003898000 | 19.936757000 | 13.776461000 | H            | 26.837234000 | 23.870273000 | 20.946632000 |
| H  | 23.999268000 | 19.144577000 | 13.924306000 | H            | 26.466048000 | 19.386981000 | 16.447372000 |
| H  | 22.313835000 | 20.830009000 | 14.037206000 | H            | 26.374541000 | 19.257528000 | 22.461532000 |
| Zr | 10.956924000 | 26.880900000 | 13.440450000 | H            | 26.969472000 | 17.873381000 | 21.066471000 |
| O  | 9.894590000  | 26.880900000 | 11.493735000 | H            | 26.503997000 | 21.054382000 | 24.156230000 |
| O  | 12.408223000 | 27.913127000 | 14.472677000 | H            | 26.993307000 | 16.187126000 | 19.255935000 |
| C  | 10.287052000 | 26.880900000 | 10.287052000 | Cu           | 27.166740000 | 22.329384000 | 18.382402000 |
| Zr | 15.923976000 | 26.880900000 | 13.440450000 | F            | 25.750436000 | 23.367705000 | 17.807838000 |
| O  | 16.986310000 | 26.880900000 | 11.493735000 | C            | 29.139185000 | 21.890415000 | 18.579445000 |
| C  | 16.593848000 | 26.880900000 | 10.287052000 | C            | 28.808631000 | 22.088746000 | 17.251296000 |
| O  | 16.986310000 | 26.880900000 | 15.387165000 | H            | 28.688120000 | 21.231609000 | 16.595710000 |
| O  | 14.472677000 | 27.913127000 | 12.408223000 | C            | 29.768796000 | 22.843060000 | 19.554934000 |
| C  | 16.593848000 | 26.880900000 | 16.593848000 | H            | 29.154738000 | 23.723241000 | 19.766173000 |
| C  | 17.650268000 | 26.880900000 | 17.650268000 | H            | 30.763973000 | 23.184467000 | 19.242596000 |
| C  | 19.634347000 | 26.880900000 | 19.634347000 | O            | 29.905577000 | 22.037941000 | 20.739320000 |
| O  | 9.894590000  | 26.880900000 | 15.387165000 | H            | 29.032232000 | 23.049337000 | 16.801780000 |
| C  | 10.287052000 | 26.880900000 | 16.593848000 | C            | 26.537474000 | 28.455200000 | 19.318326000 |
| Zr | 13.440450000 | 26.880900000 | 15.923976000 | C            | 27.016220000 | 27.386847000 | 20.292524000 |
| O  | 11.493735000 | 26.880900000 | 16.986310000 | C            | 27.122983000 | 25.971244000 | 19.695937000 |
| O  | 14.472677000 | 27.913127000 | 14.472677000 | C            | 25.194647000 | 28.174556000 | 18.654595000 |
| Zr | 13.440450000 | 26.880900000 | 10.956924000 | C            | 27.370483000 | 25.895611000 | 18.214883000 |
| O  | 11.493735000 | 26.880900000 | 9.894590000  | C            | 25.098458000 | 26.788222000 | 18.007625000 |
| O  | 15.387165000 | 26.880900000 | 9.894590000  | N            | 26.350106000 | 26.344335000 | 17.406092000 |
| O  | 12.408223000 | 27.913127000 | 12.408223000 | H            | 26.490270000 | 29.419918000 | 19.838270000 |
| O  | 15.387165000 | 26.880900000 | 16.986310000 | H            | 25.018278000 | 28.944220000 | 17.893231000 |
| Zr | 13.440450000 | 29.364426000 | 13.440450000 | C            | 28.671416000 | 25.495860000 | 16.355109000 |
| O  | 11.493735000 | 30.426760000 | 13.440450000 | N            | 28.521118000 | 25.461364000 | 17.800248000 |
| C  | 10.287052000 | 30.034298000 | 13.440450000 | C            | 27.420287000 | 24.986759000 | 15.654109000 |
| O  | 15.387165000 | 30.426760000 | 13.440450000 | C            | 26.249131000 | 25.871232000 | 16.023260000 |
| C  | 16.593848000 | 30.034298000 | 13.440450000 | H            | 25.317158000 | 25.300903000 | 15.927051000 |
| O  | 16.986310000 | 28.827615000 | 13.440450000 | H            | 29.555664000 | 24.909052000 | 16.071415000 |
| O  | 9.894590000  | 28.827615000 | 13.440450000 | H            | 27.293774000 | 28.572123000 | 18.531443000 |
| C  | 22.671082000 | 26.880900000 | 22.671082000 | H            | 24.381074000 | 28.277205000 | 19.383715000 |
| C  | 20.687003000 | 26.880900000 | 20.687003000 | H            | 26.179525000 | 26.745975000 | 15.358423000 |
| C  | 21.360638000 | 27.201858000 | 22.988008000 | H            | 28.881242000 | 26.528916000 | 16.026653000 |
| C  | 20.384593000 | 27.216911000 | 22.003898000 | H            | 26.353547000 | 27.355859000 | 21.164921000 |
| H  | 21.176773000 | 27.364756000 | 23.999268000 | H            | 27.997169000 | 27.686945000 | 20.675106000 |
| H  | 19.491341000 | 27.477656000 | 22.313835000 | H            | 27.540765000 | 24.956189000 | 14.566032000 |
| O  | 13.440450000 | 28.827615000 | 16.986310000 | H            | 27.199423000 | 23.974485000 | 16.008731000 |
| C  | 13.440450000 | 30.034298000 | 16.593848000 | H            | 27.952697000 | 25.446303000 | 20.178946000 |
| O  | 13.440450000 | 28.827615000 | 9.894590000  | H            | 26.208405000 | 25.405683000 | 19.911094000 |
| C  | 13.440450000 | 30.034298000 | 10.287052000 | H            | 24.744720000 | 26.033257000 | 18.721701000 |
| O  | 13.440450000 | 30.426760000 | 15.387165000 | H            | 24.347792000 | 26.807617000 | 17.212370000 |
| O  | 13.440450000 | 30.426760000 | 11.493735000 | C            | 29.697407000 | 20.741158000 | 20.433404000 |
| C  | 17.333342000 | 27.201858000 | 18.960712000 | O            | 29.355364000 | 20.611929000 | 19.115102000 |
| C  | 18.317452000 | 27.216911000 | 19.936757000 | O            | 29.782293000 | 19.822150000 | 21.196552000 |
| H  | 16.322082000 | 27.364756000 | 19.144577000 | <b>k. PC</b> |              |              |              |
| H  | 18.007515000 | 27.477656000 | 20.830009000 | N            | 26.662566000 | 21.873041000 | 20.395749000 |
| H  | 13.440450000 | 30.790903000 | 9.530447000  | N            | 26.532033000 | 19.917774000 | 18.454964000 |
| H  | 17.350453000 | 26.880900000 | 9.530447000  | C            | 26.628707000 | 20.576281000 | 20.793849000 |
| H  | 17.350453000 | 30.790903000 | 13.440450000 | C            | 26.675585000 | 22.855944000 | 21.314280000 |
| H  | 13.440450000 | 30.790903000 | 17.350453000 | C            | 26.575322000 | 19.006433000 | 17.475498000 |
| H  | 9.530447000  | 30.790903000 | 13.440450000 | C            | 26.638677000 | 19.517448000 | 19.738927000 |

|    |              |              |              |   |              |              |              |
|----|--------------|--------------|--------------|---|--------------|--------------|--------------|
| C  | 26.616880000 | 20.274473000 | 22.162281000 | O | 25.848909000 | 27.912895000 | 27.912897000 |
| C  | 26.697725000 | 22.631569000 | 22.697219000 | O | 23.334862000 | 26.880939000 | 28.827594000 |
| C  | 26.712480000 | 17.624432000 | 17.691783000 | O | 23.334864000 | 28.827596000 | 26.880937000 |
| C  | 26.787644000 | 18.158790000 | 20.049767000 | O | 24.934210000 | 30.426941000 | 26.880925000 |
| C  | 26.666901000 | 21.291446000 | 23.104501000 | O | 26.880889000 | 30.426939000 | 24.934203000 |
| C  | 26.817935000 | 17.219648000 | 19.028655000 | O | 26.880879000 | 30.426942000 | 28.827590000 |
| C  | 26.809926000 | 23.730842000 | 23.728933000 | O | 27.912786000 | 27.912776000 | 27.912777000 |
| C  | 26.809921000 | 16.592429000 | 16.590498000 | O | 28.827596000 | 30.426944000 | 26.880863000 |
| O  | 26.880884000 | 24.934158000 | 23.334969000 | O | 30.426933000 | 24.934198000 | 26.880924000 |
| O  | 26.880907000 | 23.334959000 | 24.934140000 | O | 30.426936000 | 26.880929000 | 24.934199000 |
| O  | 26.880903000 | 15.387213000 | 16.986401000 | O | 30.426944000 | 26.880866000 | 28.827595000 |
| O  | 26.880889000 | 16.986370000 | 15.387189000 | O | 30.426946000 | 28.827594000 | 26.880867000 |
| Zr | 26.878142000 | 26.881612000 | 24.237883000 | O | 24.934211000 | 26.880924000 | 30.426942000 |
| Zr | 26.878206000 | 24.239690000 | 26.880717000 | O | 26.880889000 | 24.934201000 | 30.426937000 |
| Zr | 26.878210000 | 13.440633000 | 16.081660000 | O | 26.880878000 | 28.827589000 | 30.426943000 |
| Zr | 26.878141000 | 16.083467000 | 13.439738000 | O | 28.827598000 | 26.880862000 | 30.426940000 |
| O  | 24.934203000 | 26.880849000 | 23.334882000 | O | 25.848909000 | 12.408453000 | 12.408455000 |
| O  | 25.848911000 | 25.848918000 | 25.848917000 | O | 23.334862000 | 11.493756000 | 13.440411000 |
| O  | 25.849015000 | 27.912768000 | 25.849028000 | O | 23.334855000 | 15.387135000 | 13.440484000 |
| O  | 27.912782000 | 25.849032000 | 25.849031000 | O | 23.334864000 | 13.440413000 | 11.493754000 |
| O  | 27.912889000 | 27.912886000 | 25.848919000 | O | 23.334856000 | 13.440488000 | 15.387138000 |
| O  | 26.880945000 | 28.827581000 | 23.334856000 | O | 24.934211000 | 9.894408000  | 13.440426000 |
| O  | 28.827591000 | 26.880922000 | 23.334870000 | O | 26.880889000 | 9.894413000  | 15.387149000 |
| O  | 24.934197000 | 23.334881000 | 26.880846000 | O | 27.912786000 | 12.408573000 | 12.408574000 |
| O  | 25.849012000 | 25.849025000 | 27.912771000 | O | 26.880878000 | 9.894407000  | 11.493761000 |
| O  | 27.912892000 | 25.848913000 | 27.912887000 | O | 28.827598000 | 9.894410000  | 13.440488000 |
| O  | 26.880944000 | 23.334850000 | 28.827576000 | O | 30.426944000 | 11.493755000 | 13.440484000 |
| O  | 28.827591000 | 23.334868000 | 26.880917000 | O | 30.426936000 | 15.387151000 | 13.440421000 |
| O  | 25.849012000 | 12.408579000 | 14.472325000 | O | 30.426946000 | 13.440483000 | 11.493756000 |
| O  | 25.848911000 | 14.472433000 | 14.472432000 | O | 30.426933000 | 13.440426000 | 15.387152000 |
| O  | 24.934197000 | 13.440504000 | 16.986469000 | O | 24.934210000 | 13.440425000 | 9.894409000  |
| O  | 26.880944000 | 11.493774000 | 16.986500000 | O | 26.880879000 | 11.493760000 | 9.894408000  |
| O  | 27.912892000 | 12.408463000 | 14.472437000 | O | 26.880889000 | 15.387147000 | 9.894411000  |
| O  | 27.912782000 | 14.472319000 | 14.472318000 | O | 28.827596000 | 13.440487000 | 9.894406000  |
| O  | 28.827591000 | 13.440433000 | 16.986482000 | C | 23.753697000 | 27.066116000 | 30.007949000 |
| O  | 25.849015000 | 14.472322000 | 12.408582000 | C | 23.753135000 | 30.008630000 | 27.063604000 |
| O  | 24.934203000 | 16.986468000 | 13.440501000 | C | 26.696398000 | 30.008246000 | 30.008106000 |
| O  | 27.912889000 | 14.472431000 | 12.408464000 | C | 30.007968000 | 30.008237000 | 26.695581000 |
| O  | 26.880945000 | 16.986494000 | 11.493769000 | C | 30.008286000 | 26.697416000 | 30.008420000 |
| O  | 28.827591000 | 16.986480000 | 13.440428000 | C | 23.753697000 | 10.313401000 | 13.255234000 |
| C  | 23.755332000 | 26.686089000 | 23.755213000 | C | 23.753135000 | 13.257746000 | 10.312720000 |
| Zr | 24.236612000 | 26.881475000 | 26.880552000 | C | 26.696398000 | 10.313244000 | 10.313104000 |
| Zr | 26.880671000 | 29.524609000 | 26.880680000 | C | 30.008286000 | 10.312930000 | 13.623934000 |
| Zr | 29.524440000 | 26.882357000 | 26.881381000 | C | 30.007968000 | 13.625768000 | 10.313113000 |
| C  | 27.064326000 | 30.008530000 | 23.753165000 | H | 27.351814000 | 30.759513000 | 23.002127000 |
| C  | 30.008123000 | 27.066993000 | 23.753823000 | H | 30.758179000 | 27.358190000 | 23.003211000 |
| C  | 23.755714000 | 23.756676000 | 26.684338000 | H | 23.008991000 | 23.009158000 | 26.377462000 |
| Zr | 26.880615000 | 26.881402000 | 29.524137000 | H | 27.355985000 | 23.003402000 | 30.758391000 |
| C  | 27.065914000 | 23.754135000 | 30.008060000 | H | 30.757581000 | 23.004153000 | 27.359935000 |
| C  | 30.007964000 | 23.754748000 | 27.067567000 | H | 23.008991000 | 13.943888000 | 17.312192000 |
| Zr | 24.236612000 | 13.440798000 | 13.439875000 | H | 27.355985000 | 9.562959000  | 17.317948000 |
| Zr | 26.880615000 | 10.797213000 | 13.439948000 | H | 30.757582000 | 12.961415000 | 17.317197000 |
| C  | 23.755714000 | 13.637012000 | 16.564674000 | H | 27.351814000 | 17.319223000 | 9.561837000  |
| C  | 27.065914000 | 10.313290000 | 16.567215000 | H | 30.758179000 | 17.318139000 | 12.963160000 |
| Zr | 29.524440000 | 13.439969000 | 13.438993000 | H | 23.003255000 | 27.356162000 | 30.758555000 |
| C  | 30.007964000 | 13.253783000 | 16.566602000 | H | 23.001913000 | 30.759916000 | 27.349810000 |
| Zr | 26.880671000 | 13.440670000 | 10.796741000 | H | 26.407446000 | 30.758917000 | 30.758911000 |
| C  | 23.755332000 | 16.566137000 | 13.635261000 | H | 30.758582000 | 30.758568000 | 26.405278000 |
| C  | 27.064326000 | 16.568185000 | 10.312820000 | H | 30.759373000 | 26.409850000 | 30.759355000 |
| C  | 30.008123000 | 16.567527000 | 13.254357000 | H | 23.003255000 | 9.562795000  | 12.965188000 |
| O  | 23.334855000 | 26.880866000 | 24.934215000 | H | 23.001913000 | 12.971540000 | 9.561434000  |
| O  | 23.334856000 | 24.934212000 | 26.880862000 | H | 26.407446000 | 9.562439000  | 9.562434000  |

## ARTICLE

## Journal Name

|    |              |              |              |    |              |              |              |
|----|--------------|--------------|--------------|----|--------------|--------------|--------------|
| H  | 30.759373000 | 9.561995000  | 13.911500000 | O  | 16.986310000 | 26.880900000 | 15.387165000 |
| H  | 30.758582000 | 13.916071000 | 9.562782000  | O  | 14.472677000 | 27.913127000 | 12.408223000 |
| H  | 25.215026000 | 11.776433000 | 15.102845000 | C  | 16.593848000 | 26.880900000 | 16.593848000 |
| H  | 28.544134000 | 11.776251000 | 11.775822000 | C  | 17.650268000 | 26.880900000 | 17.650268000 |
| H  | 28.555271000 | 15.099035000 | 15.098322000 | C  | 19.634347000 | 26.880900000 | 19.634347000 |
| H  | 25.215244000 | 15.103495000 | 11.776660000 | O  | 9.894590000  | 26.880900000 | 15.387165000 |
| H  | 25.215244000 | 28.544690000 | 25.217855000 | C  | 10.287052000 | 26.880900000 | 16.593848000 |
| H  | 28.555271000 | 25.223028000 | 25.222315000 | Zr | 13.440450000 | 26.880900000 | 15.923976000 |
| H  | 28.544134000 | 28.545528000 | 28.545099000 | O  | 11.493735000 | 26.880900000 | 16.986310000 |
| H  | 25.215026000 | 25.218505000 | 28.544917000 | O  | 14.472677000 | 27.913127000 | 14.472677000 |
| O  | 14.472677000 | 25.848673000 | 14.472677000 | Zr | 13.440450000 | 26.880900000 | 10.956924000 |
| O  | 12.408223000 | 25.848673000 | 12.408223000 | O  | 11.493735000 | 26.880900000 | 9.894590000  |
| O  | 14.472677000 | 25.848673000 | 12.408223000 | O  | 15.387165000 | 26.880900000 | 9.894590000  |
| O  | 12.408223000 | 25.848673000 | 14.472677000 | O  | 12.408223000 | 27.913127000 | 12.408223000 |
| Zr | 13.440450000 | 24.397374000 | 13.440450000 | O  | 15.387165000 | 26.880900000 | 16.986310000 |
| O  | 11.493735000 | 23.335040000 | 13.440450000 | Zr | 13.440450000 | 29.364426000 | 13.440450000 |
| C  | 10.287052000 | 23.727502000 | 13.440450000 | O  | 11.493735000 | 30.426760000 | 13.440450000 |
| O  | 15.387165000 | 23.335040000 | 13.440450000 | C  | 10.287052000 | 30.034298000 | 13.440450000 |
| C  | 16.593848000 | 23.727502000 | 13.440450000 | O  | 15.387165000 | 30.426760000 | 13.440450000 |
| C  | 17.650268000 | 22.671082000 | 13.440450000 | C  | 16.593848000 | 30.034298000 | 13.440450000 |
| C  | 19.634347000 | 20.687003000 | 13.440450000 | O  | 16.986310000 | 28.827615000 | 13.440450000 |
| C  | 18.960712000 | 22.988008000 | 13.761408000 | O  | 9.894590000  | 28.827615000 | 13.440450000 |
| C  | 19.936757000 | 22.003898000 | 13.776461000 | C  | 22.671082000 | 26.880900000 | 22.671082000 |
| H  | 19.144577000 | 23.999268000 | 13.924306000 | C  | 20.687003000 | 26.880900000 | 20.687003000 |
| H  | 20.830009000 | 22.313835000 | 14.037206000 | C  | 21.360638000 | 27.201858000 | 22.988008000 |
| O  | 9.894590000  | 24.934185000 | 13.440450000 | C  | 20.384593000 | 27.216911000 | 22.003898000 |
| O  | 16.986310000 | 24.934185000 | 13.440450000 | H  | 21.176773000 | 27.364756000 | 23.999268000 |
| C  | 17.333342000 | 21.360638000 | 13.119492000 | H  | 19.491341000 | 27.477656000 | 22.313835000 |
| C  | 18.317452000 | 20.384593000 | 13.104439000 | O  | 13.440450000 | 28.827615000 | 16.986310000 |
| H  | 16.322082000 | 21.176773000 | 12.956594000 | C  | 13.440450000 | 30.034298000 | 16.593848000 |
| H  | 18.007515000 | 19.491341000 | 12.843694000 | O  | 13.440450000 | 28.827615000 | 9.894590000  |
| C  | 22.988008000 | 26.559942000 | 21.360638000 | C  | 13.440450000 | 30.034298000 | 10.287052000 |
| C  | 22.003898000 | 26.544889000 | 20.384593000 | O  | 13.440450000 | 30.426760000 | 15.387165000 |
| H  | 23.999268000 | 26.397044000 | 21.176773000 | O  | 13.440450000 | 30.426760000 | 11.493735000 |
| H  | 22.313835000 | 26.284144000 | 19.491341000 | C  | 17.333342000 | 27.201858000 | 18.960712000 |
| C  | 22.671082000 | 17.650268000 | 13.440450000 | C  | 18.317452000 | 27.216911000 | 19.936757000 |
| C  | 20.687003000 | 19.634347000 | 13.440450000 | H  | 16.322082000 | 27.364756000 | 19.144577000 |
| O  | 13.440450000 | 24.934185000 | 9.894590000  | H  | 18.007515000 | 27.477656000 | 20.830009000 |
| C  | 13.440450000 | 23.727502000 | 10.287052000 | H  | 13.440450000 | 30.790903000 | 9.530447000  |
| O  | 13.440450000 | 24.934185000 | 16.986310000 | H  | 17.350453000 | 26.880900000 | 9.530447000  |
| C  | 13.440450000 | 23.727502000 | 16.593848000 | H  | 17.350453000 | 30.790903000 | 13.440450000 |
| O  | 13.440450000 | 23.335040000 | 15.387165000 | H  | 13.440450000 | 30.790903000 | 17.350453000 |
| O  | 13.440450000 | 23.335040000 | 11.493735000 | H  | 9.530447000  | 30.790903000 | 13.440450000 |
| C  | 18.960712000 | 26.559942000 | 17.333342000 | H  | 9.530447000  | 26.880900000 | 17.350453000 |
| C  | 19.936757000 | 26.544889000 | 18.317452000 | H  | 13.440450000 | 22.970897000 | 9.530447000  |
| H  | 19.144577000 | 26.397044000 | 16.322082000 | H  | 9.530447000  | 22.970897000 | 13.440450000 |
| H  | 20.830009000 | 26.284144000 | 18.007515000 | H  | 13.440450000 | 22.970897000 | 17.350453000 |
| C  | 21.360638000 | 17.333342000 | 13.119492000 | H  | 15.026933000 | 25.294417000 | 11.853967000 |
| C  | 20.384593000 | 18.317452000 | 13.104439000 | H  | 11.853967000 | 28.467383000 | 11.853967000 |
| H  | 21.176773000 | 16.322082000 | 12.956594000 | H  | 9.530447000  | 26.880900000 | 9.530447000  |
| H  | 19.491341000 | 18.007515000 | 12.843694000 | H  | 15.026933000 | 28.467383000 | 15.026933000 |
| C  | 22.988008000 | 18.960712000 | 13.761408000 | H  | 11.853967000 | 25.294417000 | 15.026933000 |
| C  | 22.003898000 | 19.936757000 | 13.776461000 | H  | 26.677363000 | 23.870737000 | 20.920394000 |
| H  | 23.999268000 | 19.144577000 | 13.924306000 | H  | 26.495027000 | 19.395576000 | 16.461580000 |
| H  | 22.313835000 | 20.830009000 | 14.037206000 | H  | 26.583370000 | 19.243605000 | 22.496477000 |
| Zr | 10.956924000 | 26.880900000 | 13.440450000 | H  | 26.915141000 | 17.830087000 | 21.075479000 |
| O  | 9.894590000  | 26.880900000 | 11.493735000 | H  | 26.687230000 | 21.064015000 | 24.165316000 |
| O  | 12.408223000 | 27.913127000 | 14.472677000 | H  | 26.944638000 | 16.165105000 | 19.250762000 |
| C  | 10.287052000 | 26.880900000 | 10.287052000 | Cu | 27.054482000 | 22.245775000 | 18.372172000 |
| Zr | 15.923976000 | 26.880900000 | 13.440450000 | F  | 25.585140000 | 23.078500000 | 17.688765000 |
| O  | 16.986310000 | 26.880900000 | 11.493735000 | C  | 29.049607000 | 21.969159000 | 18.516758000 |
| C  | 16.593848000 | 26.880900000 | 10.287052000 | C  | 28.672676000 | 22.342839000 | 17.233608000 |

|                                   |              |              |              |    |              |              |              |
|-----------------------------------|--------------|--------------|--------------|----|--------------|--------------|--------------|
| H                                 | 28.608502000 | 21.592549000 | 16.451353000 | C  | 30.008123000 | 27.066993000 | 23.753823000 |
| C                                 | 29.674318000 | 22.786854000 | 19.611386000 | C  | 23.755714000 | 23.756676000 | 26.684338000 |
| H                                 | 29.049382000 | 23.606685000 | 19.976534000 | Zr | 26.880615000 | 26.881402000 | 29.524137000 |
| H                                 | 30.661424000 | 23.186518000 | 19.339698000 | C  | 27.065914000 | 23.754135000 | 30.008060000 |
| O                                 | 29.846132000 | 21.829552000 | 20.664849000 | C  | 30.007964000 | 23.754748000 | 27.067567000 |
| H                                 | 28.782301000 | 23.376295000 | 16.920188000 | Zr | 24.236612000 | 13.440798000 | 13.439875000 |
| C                                 | 29.731699000 | 20.580621000 | 20.154211000 | Zr | 26.880615000 | 10.797213000 | 13.439948000 |
| O                                 | 29.386343000 | 20.638590000 | 18.835621000 | C  | 23.755714000 | 13.637012000 | 16.564674000 |
| O                                 | 29.895264000 | 19.567752000 | 20.770176000 | C  | 27.065914000 | 10.313290000 | 16.567215000 |
| <b>2. CuCl-UiO-67(bpy) system</b> |              |              |              | Zr | 29.524440000 | 13.439969000 | 13.438993000 |
| <b>a. Isolated</b>                |              |              |              | C  | 30.007964000 | 13.253783000 | 16.566602000 |
| N                                 | 26.713344000 | 21.854901000 | 20.404318000 | Zr | 26.880671000 | 13.440670000 | 10.796741000 |
| N                                 | 26.619382000 | 19.932484000 | 18.448804000 | C  | 23.755332000 | 16.566137000 | 13.635261000 |
| C                                 | 26.627280000 | 20.572081000 | 20.812619000 | C  | 27.064326000 | 16.568185000 | 10.312820000 |
| C                                 | 26.734458000 | 22.844365000 | 21.306952000 | C  | 30.008123000 | 16.567527000 | 13.254357000 |
| C                                 | 26.659392000 | 19.002379000 | 17.464903000 | O  | 23.334855000 | 26.880866000 | 24.934215000 |
| C                                 | 26.639316000 | 19.524707000 | 19.752156000 | O  | 23.334856000 | 24.934212000 | 26.880862000 |
| C                                 | 26.542058000 | 20.270003000 | 22.179888000 | O  | 25.848909000 | 27.912895000 | 27.912897000 |
| C                                 | 26.694914000 | 22.631662000 | 22.696213000 | O  | 23.334862000 | 26.880939000 | 28.827594000 |
| C                                 | 26.708010000 | 17.623366000 | 17.693446000 | O  | 23.334864000 | 28.827596000 | 26.880937000 |
| C                                 | 26.680960000 | 18.157387000 | 20.048628000 | O  | 24.934210000 | 30.426941000 | 26.880925000 |
| C                                 | 26.587425000 | 21.297436000 | 23.112662000 | O  | 26.880889000 | 30.426939000 | 24.934203000 |
| C                                 | 26.710815000 | 17.212017000 | 19.034135000 | O  | 26.880879000 | 30.426942000 | 28.827590000 |
| C                                 | 26.809916000 | 23.730872000 | 23.728975000 | O  | 27.912786000 | 27.912776000 | 27.912777000 |
| C                                 | 26.809921000 | 16.592371000 | 16.590484000 | O  | 28.827596000 | 30.426944000 | 26.880863000 |
| O                                 | 26.880884000 | 24.934148000 | 23.334939000 | O  | 30.426933000 | 24.934198000 | 26.880924000 |
| O                                 | 26.880896000 | 23.334956000 | 24.934140000 | O  | 30.426936000 | 26.880929000 | 24.934199000 |
| O                                 | 26.880902000 | 15.387209000 | 16.986389000 | O  | 30.426944000 | 26.880866000 | 28.827595000 |
| O                                 | 26.880882000 | 16.986414000 | 15.387203000 | O  | 30.426946000 | 28.827594000 | 26.880867000 |
| Zr                                | 26.878150000 | 26.881612000 | 24.237884000 | O  | 24.934211000 | 26.880924000 | 30.426942000 |
| Zr                                | 26.878217000 | 24.239691000 | 26.880717000 | O  | 26.880889000 | 24.934201000 | 30.426937000 |
| Zr                                | 26.878215000 | 13.440633000 | 16.081660000 | O  | 26.880878000 | 28.827589000 | 30.426943000 |
| Zr                                | 26.878146000 | 16.083467000 | 13.439738000 | O  | 28.827598000 | 26.880862000 | 30.426940000 |
| O                                 | 24.934203000 | 26.880849000 | 23.334882000 | O  | 25.848909000 | 12.408453000 | 12.408455000 |
| O                                 | 25.848911000 | 25.848918000 | 25.848917000 | O  | 23.334862000 | 11.493756000 | 13.440411000 |
| O                                 | 25.849015000 | 27.912768000 | 25.849028000 | O  | 23.334855000 | 15.387135000 | 13.440484000 |
| O                                 | 27.912782000 | 25.849032000 | 25.849031000 | O  | 23.334864000 | 13.440413000 | 11.493754000 |
| O                                 | 27.912889000 | 27.912886000 | 25.848919000 | O  | 23.334856000 | 13.440488000 | 15.387138000 |
| O                                 | 26.880945000 | 28.827581000 | 23.334856000 | O  | 24.934211000 | 9.894408000  | 13.440426000 |
| O                                 | 28.827591000 | 26.880922000 | 23.334870000 | O  | 26.880889000 | 9.894413000  | 15.387149000 |
| O                                 | 24.934197000 | 23.334881000 | 26.880846000 | O  | 27.912786000 | 12.408573000 | 12.408574000 |
| O                                 | 25.849012000 | 25.849025000 | 27.912771000 | O  | 26.880878000 | 9.894407000  | 11.493761000 |
| O                                 | 27.912892000 | 25.848913000 | 27.912887000 | O  | 28.827598000 | 9.894410000  | 13.440488000 |
| O                                 | 26.880944000 | 23.334850000 | 28.827576000 | O  | 30.426944000 | 11.493755000 | 13.440484000 |
| O                                 | 28.827591000 | 23.334868000 | 26.880917000 | O  | 30.426936000 | 15.387151000 | 13.440421000 |
| O                                 | 25.849012000 | 12.408579000 | 14.472325000 | O  | 30.426946000 | 13.440483000 | 11.493756000 |
| O                                 | 25.848911000 | 14.472433000 | 14.472432000 | O  | 30.426933000 | 13.440426000 | 15.387152000 |
| O                                 | 24.934197000 | 13.440504000 | 16.986469000 | O  | 24.934210000 | 13.440425000 | 9.894409000  |
| O                                 | 26.880944000 | 11.493774000 | 16.986500000 | O  | 26.880879000 | 11.493760000 | 9.894408000  |
| O                                 | 27.912892000 | 12.408463000 | 14.472437000 | O  | 26.880889000 | 15.387147000 | 9.894411000  |
| O                                 | 27.912782000 | 14.472319000 | 14.472318000 | O  | 28.827596000 | 13.440487000 | 9.894406000  |
| O                                 | 28.827591000 | 13.440433000 | 16.986482000 | C  | 23.753697000 | 27.066116000 | 30.007949000 |
| O                                 | 25.849015000 | 14.472322000 | 12.408582000 | C  | 23.753135000 | 30.008630000 | 27.063604000 |
| O                                 | 24.934203000 | 16.986468000 | 13.440501000 | C  | 26.696398000 | 30.008246000 | 30.008106000 |
| O                                 | 27.912889000 | 14.472431000 | 12.408464000 | C  | 30.007968000 | 30.008237000 | 26.695581000 |
| O                                 | 26.880945000 | 16.986494000 | 11.493769000 | C  | 30.008286000 | 26.697416000 | 30.008420000 |
| O                                 | 28.827591000 | 16.986480000 | 13.440428000 | C  | 23.753697000 | 10.313401000 | 13.255234000 |
| C                                 | 23.755332000 | 26.686089000 | 23.755213000 | C  | 23.753135000 | 13.257746000 | 10.312720000 |
| Zr                                | 24.236612000 | 26.881475000 | 26.880552000 | C  | 26.696398000 | 10.313244000 | 10.313104000 |
| Zr                                | 26.880671000 | 29.524609000 | 26.880680000 | C  | 30.008286000 | 10.312930000 | 13.623934000 |
| Zr                                | 29.524440000 | 26.882357000 | 26.881381000 | C  | 30.007968000 | 13.625768000 | 10.313113000 |
| C                                 | 27.064326000 | 30.008530000 | 23.753165000 | H  | 27.351814000 | 30.759513000 | 23.002127000 |

## ARTICLE

## Journal Name

|    |              |              |              |    |              |              |              |
|----|--------------|--------------|--------------|----|--------------|--------------|--------------|
| H  | 30.758179000 | 27.358190000 | 23.003211000 | H  | 19.144577000 | 26.397044000 | 16.322082000 |
| H  | 23.008991000 | 23.009158000 | 26.377462000 | H  | 20.830009000 | 26.284144000 | 18.007515000 |
| H  | 27.355985000 | 23.003402000 | 30.758391000 | C  | 21.360638000 | 17.333342000 | 13.119492000 |
| H  | 30.757581000 | 23.004153000 | 27.359935000 | C  | 20.384593000 | 18.317452000 | 13.104439000 |
| H  | 23.008991000 | 13.943888000 | 17.312192000 | H  | 21.176773000 | 16.322082000 | 12.956594000 |
| H  | 27.355985000 | 9.562959000  | 17.317948000 | H  | 19.491341000 | 18.007515000 | 12.843694000 |
| H  | 30.757582000 | 12.961415000 | 17.317197000 | C  | 22.988008000 | 18.960712000 | 13.761408000 |
| H  | 27.351814000 | 17.319223000 | 9.561837000  | C  | 22.003898000 | 19.936757000 | 13.776461000 |
| H  | 30.758179000 | 17.318139000 | 12.963160000 | H  | 23.999268000 | 19.144577000 | 13.924306000 |
| H  | 23.003255000 | 27.356162000 | 30.758555000 | H  | 22.313835000 | 20.830009000 | 14.037206000 |
| H  | 23.001913000 | 30.759916000 | 27.349810000 | Zr | 10.956924000 | 26.880900000 | 13.440450000 |
| H  | 26.407446000 | 30.758917000 | 30.758911000 | O  | 9.894590000  | 26.880900000 | 11.493735000 |
| H  | 30.758582000 | 30.758568000 | 26.405278000 | O  | 12.408223000 | 27.913127000 | 14.472677000 |
| H  | 30.759373000 | 26.409850000 | 30.759355000 | C  | 10.287052000 | 26.880900000 | 10.287052000 |
| H  | 23.003255000 | 9.562795000  | 12.965188000 | Zr | 15.923976000 | 26.880900000 | 13.440450000 |
| H  | 23.001913000 | 12.971540000 | 9.561434000  | O  | 16.986310000 | 26.880900000 | 11.493735000 |
| H  | 26.407446000 | 9.562439000  | 9.562434000  | C  | 16.593848000 | 26.880900000 | 10.287052000 |
| H  | 30.759373000 | 9.561995000  | 13.911500000 | O  | 16.986310000 | 26.880900000 | 15.387165000 |
| H  | 30.758582000 | 13.916071000 | 9.562782000  | O  | 14.472677000 | 27.913127000 | 12.408223000 |
| H  | 25.215026000 | 11.776433000 | 15.102845000 | C  | 16.593848000 | 26.880900000 | 16.593848000 |
| H  | 28.544134000 | 11.776251000 | 11.775822000 | C  | 17.650268000 | 26.880900000 | 17.650268000 |
| H  | 28.555271000 | 15.099035000 | 15.098322000 | C  | 19.634347000 | 26.880900000 | 19.634347000 |
| H  | 25.215244000 | 15.103495000 | 11.776660000 | O  | 9.894590000  | 26.880900000 | 15.387165000 |
| H  | 25.215244000 | 28.544690000 | 25.217855000 | C  | 10.287052000 | 26.880900000 | 16.593848000 |
| H  | 28.555271000 | 25.223028000 | 25.222315000 | Zr | 13.440450000 | 26.880900000 | 15.923976000 |
| H  | 28.544134000 | 28.545528000 | 28.545099000 | O  | 11.493735000 | 26.880900000 | 16.986310000 |
| H  | 25.215026000 | 25.218505000 | 28.544917000 | O  | 14.472677000 | 27.913127000 | 14.472677000 |
| O  | 14.472677000 | 25.848673000 | 14.472677000 | Zr | 13.440450000 | 26.880900000 | 10.956924000 |
| O  | 12.408223000 | 25.848673000 | 12.408223000 | O  | 11.493735000 | 26.880900000 | 9.894590000  |
| O  | 14.472677000 | 25.848673000 | 12.408223000 | O  | 15.387165000 | 26.880900000 | 9.894590000  |
| O  | 12.408223000 | 25.848673000 | 14.472677000 | O  | 12.408223000 | 27.913127000 | 12.408223000 |
| Zr | 13.440450000 | 24.397374000 | 13.440450000 | O  | 15.387165000 | 26.880900000 | 16.986310000 |
| O  | 11.493735000 | 23.335040000 | 13.440450000 | Zr | 13.440450000 | 29.364426000 | 13.440450000 |
| C  | 10.287052000 | 23.727502000 | 13.440450000 | O  | 11.493735000 | 30.426760000 | 13.440450000 |
| O  | 15.387165000 | 23.335040000 | 13.440450000 | C  | 10.287052000 | 30.034298000 | 13.440450000 |
| C  | 16.593848000 | 23.727502000 | 13.440450000 | O  | 15.387165000 | 30.426760000 | 13.440450000 |
| C  | 17.650268000 | 22.671082000 | 13.440450000 | C  | 16.593848000 | 30.034298000 | 13.440450000 |
| C  | 19.634347000 | 20.687003000 | 13.440450000 | O  | 16.986310000 | 28.827615000 | 13.440450000 |
| C  | 18.960712000 | 22.988008000 | 13.761408000 | O  | 9.894590000  | 28.827615000 | 13.440450000 |
| C  | 19.936757000 | 22.003898000 | 13.776461000 | C  | 22.671082000 | 26.880900000 | 22.671082000 |
| H  | 19.144577000 | 23.999268000 | 13.924306000 | C  | 20.687003000 | 26.880900000 | 20.687003000 |
| H  | 20.830009000 | 22.313835000 | 14.037206000 | C  | 21.360638000 | 27.201858000 | 22.988008000 |
| O  | 9.894590000  | 24.934185000 | 13.440450000 | C  | 20.384593000 | 27.216911000 | 22.003898000 |
| O  | 16.986310000 | 24.934185000 | 13.440450000 | H  | 21.176773000 | 27.364756000 | 23.999268000 |
| C  | 17.333342000 | 21.360638000 | 13.119492000 | H  | 19.491341000 | 27.477656000 | 22.313835000 |
| C  | 18.317452000 | 20.384593000 | 13.104439000 | O  | 13.440450000 | 28.827615000 | 16.986310000 |
| H  | 16.322082000 | 21.176773000 | 12.956594000 | C  | 13.440450000 | 30.034298000 | 16.593848000 |
| H  | 18.007515000 | 19.491341000 | 12.843694000 | O  | 13.440450000 | 28.827615000 | 9.894590000  |
| C  | 22.988008000 | 26.559942000 | 21.360638000 | C  | 13.440450000 | 30.034298000 | 10.287052000 |
| C  | 22.003898000 | 26.544889000 | 20.384593000 | O  | 13.440450000 | 30.426760000 | 15.387165000 |
| H  | 23.999268000 | 26.397044000 | 21.176773000 | O  | 13.440450000 | 30.426760000 | 11.493735000 |
| H  | 22.313835000 | 26.284144000 | 19.491341000 | C  | 17.333342000 | 27.201858000 | 18.960712000 |
| C  | 22.671082000 | 17.650268000 | 13.440450000 | C  | 18.317452000 | 27.216911000 | 19.936757000 |
| C  | 20.687003000 | 19.634347000 | 13.440450000 | H  | 16.322082000 | 27.364756000 | 19.144577000 |
| O  | 13.440450000 | 24.934185000 | 9.894590000  | H  | 18.007515000 | 27.477656000 | 20.830009000 |
| C  | 13.440450000 | 23.727502000 | 10.287052000 | H  | 13.440450000 | 30.790903000 | 9.530447000  |
| O  | 13.440450000 | 24.934185000 | 16.986310000 | H  | 17.350453000 | 26.880900000 | 9.530447000  |
| C  | 13.440450000 | 23.727502000 | 16.593848000 | H  | 17.350453000 | 30.790903000 | 13.440450000 |
| O  | 13.440450000 | 23.335040000 | 15.387165000 | H  | 13.440450000 | 30.790903000 | 17.350453000 |
| O  | 13.440450000 | 23.335040000 | 11.493735000 | H  | 9.530447000  | 30.790903000 | 13.440450000 |
| C  | 18.960712000 | 26.559942000 | 17.333342000 | H  | 9.530447000  | 26.880900000 | 17.350453000 |
| C  | 19.936757000 | 26.544889000 | 18.317452000 | H  | 13.440450000 | 22.970897000 | 9.530447000  |

|              |              |              |              |    |              |              |              |
|--------------|--------------|--------------|--------------|----|--------------|--------------|--------------|
| H            | 9.530447000  | 22.970897000 | 13.440450000 | C  | 23.755332000 | 26.686089000 | 23.755213000 |
| H            | 13.440450000 | 22.970897000 | 17.350453000 | Zr | 24.236612000 | 26.881475000 | 26.880552000 |
| H            | 15.026933000 | 25.294417000 | 11.853967000 | Zr | 26.880671000 | 29.524609000 | 26.880680000 |
| H            | 11.853967000 | 28.467383000 | 11.853967000 | Zr | 29.524440000 | 26.882357000 | 26.881381000 |
| H            | 9.530447000  | 26.880900000 | 9.530447000  | C  | 27.064326000 | 30.008530000 | 23.753165000 |
| H            | 15.026933000 | 28.467383000 | 15.026933000 | C  | 30.008123000 | 27.066993000 | 23.753823000 |
| H            | 11.853967000 | 25.294417000 | 15.026933000 | C  | 23.755714000 | 23.756676000 | 26.684338000 |
| H            | 26.798487000 | 23.852230000 | 20.900248000 | Zr | 26.880615000 | 26.881402000 | 29.524137000 |
| H            | 26.654633000 | 19.388008000 | 16.449416000 | C  | 27.065914000 | 23.754135000 | 30.008060000 |
| H            | 26.443506000 | 19.245696000 | 22.524440000 | C  | 30.007964000 | 23.754748000 | 27.067567000 |
| H            | 26.706383000 | 17.826723000 | 21.081197000 | Zr | 24.236612000 | 13.440798000 | 13.439875000 |
| H            | 26.545622000 | 21.081731000 | 24.175624000 | Zr | 26.880615000 | 10.797213000 | 13.439948000 |
| H            | 26.752643000 | 16.151899000 | 19.260635000 | C  | 23.755714000 | 13.637012000 | 16.564674000 |
| Cu           | 26.537294000 | 21.839769000 | 18.078293000 | C  | 27.065914000 | 10.313290000 | 16.567215000 |
| Cl           | 26.345523000 | 23.769481000 | 17.227127000 | Zr | 29.524440000 | 13.439969000 | 13.438993000 |
| <b>b. PA</b> |              |              |              | C  | 30.007964000 | 13.253783000 | 16.566602000 |
| N            | 26.725991000 | 21.886355000 | 20.387893000 | Zr | 26.880671000 | 13.440670000 | 10.796741000 |
| N            | 26.408433000 | 19.908302000 | 18.449230000 | C  | 23.755332000 | 16.566137000 | 13.635261000 |
| C            | 26.655757000 | 20.601097000 | 20.789338000 | C  | 27.064326000 | 16.568185000 | 10.312820000 |
| C            | 26.738231000 | 22.858201000 | 21.306364000 | C  | 30.008123000 | 16.567527000 | 13.254357000 |
| C            | 26.453933000 | 18.985354000 | 17.472300000 | O  | 23.334855000 | 26.880866000 | 24.934215000 |
| C            | 26.669169000 | 19.544803000 | 19.731375000 | O  | 23.334856000 | 24.934212000 | 26.880862000 |
| C            | 26.581739000 | 20.281271000 | 22.151500000 | O  | 25.848909000 | 27.912895000 | 27.912897000 |
| C            | 26.702986000 | 22.634735000 | 22.694238000 | O  | 23.334862000 | 26.880939000 | 28.827594000 |
| C            | 26.724491000 | 17.626840000 | 17.689817000 | O  | 23.334864000 | 28.827596000 | 26.880937000 |
| C            | 26.956942000 | 18.206654000 | 20.024480000 | O  | 24.934210000 | 30.426941000 | 26.880925000 |
| C            | 26.610702000 | 21.297468000 | 23.098008000 | O  | 26.880889000 | 30.426939000 | 24.934203000 |
| C            | 26.965383000 | 17.251656000 | 19.016976000 | O  | 26.880879000 | 30.426942000 | 28.827590000 |
| C            | 26.809925000 | 23.730886000 | 23.728973000 | O  | 27.912786000 | 27.912776000 | 27.912777000 |
| C            | 26.809925000 | 16.592377000 | 16.590464000 | O  | 28.827596000 | 30.426944000 | 26.880863000 |
| O            | 26.880885000 | 24.934153000 | 23.334955000 | O  | 30.426933000 | 24.934198000 | 26.880924000 |
| O            | 26.880903000 | 23.334945000 | 24.934136000 | O  | 30.426936000 | 26.880929000 | 24.934199000 |
| O            | 26.880903000 | 15.387214000 | 16.986405000 | O  | 30.426944000 | 26.880866000 | 28.827595000 |
| O            | 26.880885000 | 16.986395000 | 15.387197000 | O  | 30.426946000 | 28.827594000 | 26.880867000 |
| Zr           | 26.878142000 | 26.881612000 | 24.237883000 | O  | 24.934211000 | 26.880924000 | 30.426942000 |
| Zr           | 26.878209000 | 24.239690000 | 26.880717000 | O  | 26.880889000 | 24.934201000 | 30.426937000 |
| Zr           | 26.878209000 | 13.440633000 | 16.081660000 | O  | 26.880878000 | 28.827589000 | 30.426943000 |
| Zr           | 26.878142000 | 16.083467000 | 13.439738000 | O  | 28.827598000 | 26.880862000 | 30.426940000 |
| O            | 24.934203000 | 26.880849000 | 23.334882000 | O  | 25.848909000 | 12.408453000 | 12.408455000 |
| O            | 25.848911000 | 25.848918000 | 25.848917000 | O  | 23.334862000 | 11.493756000 | 13.440411000 |
| O            | 25.849015000 | 27.912768000 | 25.849028000 | O  | 23.334855000 | 15.387135000 | 13.440484000 |
| O            | 27.912782000 | 25.849032000 | 25.849031000 | O  | 23.334864000 | 13.440413000 | 11.493754000 |
| O            | 27.912889000 | 27.912886000 | 25.848919000 | O  | 23.334856000 | 13.440488000 | 15.387138000 |
| O            | 26.880945000 | 28.827581000 | 23.334856000 | O  | 24.934211000 | 9.894408000  | 13.440426000 |
| O            | 28.827591000 | 26.880922000 | 23.334870000 | O  | 26.880889000 | 9.894413000  | 15.387149000 |
| O            | 24.934197000 | 23.334881000 | 26.880846000 | O  | 27.912786000 | 12.408573000 | 12.408574000 |
| O            | 25.849012000 | 25.849025000 | 27.912771000 | O  | 26.880878000 | 9.894407000  | 11.493761000 |
| O            | 27.912892000 | 25.848913000 | 27.912887000 | O  | 28.827598000 | 9.894410000  | 13.440488000 |
| O            | 26.880944000 | 23.334850000 | 28.827576000 | O  | 30.426944000 | 11.493755000 | 13.440484000 |
| O            | 28.827591000 | 23.334868000 | 26.880917000 | O  | 30.426936000 | 15.387151000 | 13.440421000 |
| O            | 25.849012000 | 12.408579000 | 14.472325000 | O  | 30.426946000 | 13.440483000 | 11.493756000 |
| O            | 25.848911000 | 14.472433000 | 14.472432000 | O  | 30.426933000 | 13.440426000 | 15.387152000 |
| O            | 24.934197000 | 13.440504000 | 16.986469000 | O  | 24.934210000 | 13.440425000 | 9.894409000  |
| O            | 26.880944000 | 11.493774000 | 16.986500000 | O  | 26.880879000 | 11.493760000 | 9.894408000  |
| O            | 27.912892000 | 12.408463000 | 14.472437000 | O  | 26.880889000 | 15.387147000 | 9.894411000  |
| O            | 27.912782000 | 14.472319000 | 14.472318000 | O  | 28.827596000 | 13.440487000 | 9.894406000  |
| O            | 28.827591000 | 13.440433000 | 16.986482000 | C  | 23.753697000 | 27.066116000 | 30.007949000 |
| O            | 25.849015000 | 14.472322000 | 12.408582000 | C  | 23.753135000 | 30.008630000 | 27.063604000 |
| O            | 24.934203000 | 16.986468000 | 13.440501000 | C  | 26.696398000 | 30.008246000 | 30.008106000 |
| O            | 27.912889000 | 14.472431000 | 12.408464000 | C  | 30.007968000 | 30.008237000 | 26.695581000 |
| O            | 26.880945000 | 16.986494000 | 11.493769000 | C  | 30.008286000 | 26.697416000 | 30.008420000 |
| O            | 28.827591000 | 16.986480000 | 13.440428000 | C  | 23.753697000 | 10.313401000 | 13.255234000 |

## ARTICLE

## Journal Name

|    |              |              |              |    |              |              |              |
|----|--------------|--------------|--------------|----|--------------|--------------|--------------|
| C  | 23.753135000 | 13.257746000 | 10.312720000 | C  | 13.440450000 | 23.727502000 | 16.593848000 |
| C  | 26.696398000 | 10.313244000 | 10.313104000 | O  | 13.440450000 | 23.335040000 | 15.387165000 |
| C  | 30.008286000 | 10.312930000 | 13.623934000 | O  | 13.440450000 | 23.335040000 | 11.493735000 |
| C  | 30.007968000 | 13.625768000 | 10.313113000 | C  | 18.960712000 | 26.559942000 | 17.333342000 |
| H  | 27.351814000 | 30.759513000 | 23.002127000 | C  | 19.936757000 | 26.544889000 | 18.317452000 |
| H  | 30.758179000 | 27.358190000 | 23.003211000 | H  | 19.144577000 | 26.397044000 | 16.322082000 |
| H  | 23.008991000 | 23.009158000 | 26.377462000 | H  | 20.830009000 | 26.284144000 | 18.007515000 |
| H  | 27.355985000 | 23.003402000 | 30.758391000 | C  | 21.360638000 | 17.333342000 | 13.119492000 |
| H  | 30.757581000 | 23.004153000 | 27.359935000 | C  | 20.384593000 | 18.317452000 | 13.104439000 |
| H  | 23.008991000 | 13.943888000 | 17.312192000 | H  | 21.176773000 | 16.322082000 | 12.956594000 |
| H  | 27.355985000 | 9.562959000  | 17.317948000 | H  | 19.491341000 | 18.007515000 | 12.843694000 |
| H  | 30.757582000 | 12.961415000 | 17.317197000 | C  | 22.988008000 | 18.960712000 | 13.761408000 |
| H  | 27.351814000 | 17.319223000 | 9.561837000  | C  | 22.003898000 | 19.936757000 | 13.776461000 |
| H  | 30.758179000 | 17.318139000 | 12.963160000 | H  | 23.999268000 | 19.144577000 | 13.924306000 |
| H  | 23.003255000 | 27.356162000 | 30.758555000 | H  | 22.313835000 | 20.830009000 | 14.037206000 |
| H  | 23.001913000 | 30.759916000 | 27.349810000 | Zr | 10.956924000 | 26.880900000 | 13.440450000 |
| H  | 26.407446000 | 30.758917000 | 30.758911000 | O  | 9.894590000  | 26.880900000 | 11.493735000 |
| H  | 30.758582000 | 30.758568000 | 26.405278000 | O  | 12.408223000 | 27.913127000 | 14.472677000 |
| H  | 30.759373000 | 26.409850000 | 30.759355000 | C  | 10.287052000 | 26.880900000 | 10.287052000 |
| H  | 23.003255000 | 9.562795000  | 12.965188000 | Zr | 15.923976000 | 26.880900000 | 13.440450000 |
| H  | 23.001913000 | 12.971540000 | 9.561434000  | O  | 16.986310000 | 26.880900000 | 11.493735000 |
| H  | 26.407446000 | 9.562439000  | 9.562434000  | C  | 16.593848000 | 26.880900000 | 10.287052000 |
| H  | 30.759373000 | 9.561995000  | 13.911500000 | O  | 16.986310000 | 26.880900000 | 15.387165000 |
| H  | 30.758582000 | 13.916071000 | 9.562782000  | O  | 14.472677000 | 27.913127000 | 12.408223000 |
| H  | 25.215026000 | 11.776433000 | 15.102845000 | C  | 16.593848000 | 26.880900000 | 16.593848000 |
| H  | 28.544134000 | 11.776251000 | 11.775822000 | C  | 17.650268000 | 26.880900000 | 17.650268000 |
| H  | 28.555271000 | 15.099035000 | 15.098322000 | C  | 19.634347000 | 26.880900000 | 19.634347000 |
| H  | 25.215244000 | 15.103495000 | 11.776660000 | O  | 9.894590000  | 26.880900000 | 15.387165000 |
| H  | 25.215244000 | 28.544690000 | 25.217855000 | C  | 10.287052000 | 26.880900000 | 16.593848000 |
| H  | 28.555271000 | 25.223028000 | 25.222315000 | Zr | 13.440450000 | 26.880900000 | 15.923976000 |
| H  | 28.544134000 | 28.545528000 | 28.545099000 | O  | 11.493735000 | 26.880900000 | 16.986310000 |
| H  | 25.215026000 | 25.218505000 | 28.544917000 | O  | 14.472677000 | 27.913127000 | 14.472677000 |
| O  | 14.472677000 | 25.848673000 | 14.472677000 | Zr | 13.440450000 | 26.880900000 | 10.956924000 |
| O  | 12.408223000 | 25.848673000 | 12.408223000 | O  | 11.493735000 | 26.880900000 | 9.894590000  |
| O  | 14.472677000 | 25.848673000 | 12.408223000 | O  | 15.387165000 | 26.880900000 | 9.894590000  |
| O  | 12.408223000 | 25.848673000 | 14.472677000 | O  | 12.408223000 | 27.913127000 | 12.408223000 |
| Zr | 13.440450000 | 24.397374000 | 13.440450000 | O  | 15.387165000 | 26.880900000 | 16.986310000 |
| O  | 11.493735000 | 23.335040000 | 13.440450000 | Zr | 13.440450000 | 29.364426000 | 13.440450000 |
| C  | 10.287052000 | 23.727502000 | 13.440450000 | O  | 11.493735000 | 30.426760000 | 13.440450000 |
| O  | 15.387165000 | 23.335040000 | 13.440450000 | C  | 10.287052000 | 30.034298000 | 13.440450000 |
| C  | 16.593848000 | 23.727502000 | 13.440450000 | O  | 15.387165000 | 30.426760000 | 13.440450000 |
| C  | 17.650268000 | 22.671082000 | 13.440450000 | C  | 16.593848000 | 30.034298000 | 13.440450000 |
| C  | 19.634347000 | 20.687003000 | 13.440450000 | O  | 16.986310000 | 28.827615000 | 13.440450000 |
| C  | 18.960712000 | 22.988008000 | 13.761408000 | O  | 9.894590000  | 28.827615000 | 13.440450000 |
| C  | 19.936757000 | 22.003898000 | 13.776461000 | C  | 22.671082000 | 26.880900000 | 22.671082000 |
| H  | 19.144577000 | 23.999268000 | 13.924306000 | C  | 20.687003000 | 26.880900000 | 20.687003000 |
| H  | 20.830009000 | 22.313835000 | 14.037206000 | C  | 21.360638000 | 27.201858000 | 22.988008000 |
| O  | 9.894590000  | 24.934185000 | 13.440450000 | C  | 20.384593000 | 27.216911000 | 22.003898000 |
| O  | 16.986310000 | 24.934185000 | 13.440450000 | H  | 21.176773000 | 27.364756000 | 23.999268000 |
| C  | 17.333342000 | 21.360638000 | 13.119492000 | H  | 19.491341000 | 27.477656000 | 22.313835000 |
| C  | 18.317452000 | 20.384593000 | 13.104439000 | O  | 13.440450000 | 28.827615000 | 16.986310000 |
| H  | 16.322082000 | 21.176773000 | 12.956594000 | C  | 13.440450000 | 30.034298000 | 16.593848000 |
| H  | 18.007515000 | 19.491341000 | 12.843694000 | O  | 13.440450000 | 28.827615000 | 9.894590000  |
| C  | 22.988008000 | 26.559942000 | 21.360638000 | C  | 13.440450000 | 30.034298000 | 10.287052000 |
| C  | 22.003898000 | 26.544889000 | 20.384593000 | O  | 13.440450000 | 30.426760000 | 15.387165000 |
| H  | 23.999268000 | 26.397044000 | 21.176773000 | O  | 13.440450000 | 30.426760000 | 11.493735000 |
| H  | 22.313835000 | 26.284144000 | 19.491341000 | C  | 17.333342000 | 27.201858000 | 18.960712000 |
| C  | 22.671082000 | 17.650268000 | 13.440450000 | C  | 18.317452000 | 27.216911000 | 19.936757000 |
| C  | 20.687003000 | 19.634347000 | 13.440450000 | H  | 16.322082000 | 27.364756000 | 19.144577000 |
| O  | 13.440450000 | 24.934185000 | 9.894590000  | H  | 18.007515000 | 27.477656000 | 20.830009000 |
| C  | 13.440450000 | 23.727502000 | 10.287052000 | H  | 13.440450000 | 30.790903000 | 9.530447000  |
| O  | 13.440450000 | 24.934185000 | 16.986310000 | H  | 17.350453000 | 26.880900000 | 9.530447000  |



| Journal Name     |              |              |              | ARTICLE |              |              |               |
|------------------|--------------|--------------|--------------|---------|--------------|--------------|---------------|
| H                | 17.350453000 | 30.790903000 | 13.440450000 | O       | 28.827591000 | 23.334868000 | 26.880917000  |
| H                | 13.440450000 | 30.790903000 | 17.350453000 | O       | 25.849012000 | 12.408579000 | 14.472325000  |
| H                | 9.530447000  | 30.790903000 | 13.440450000 | O       | 25.848911000 | 14.472433000 | 14.472432000  |
| H                | 9.530447000  | 26.880900000 | 17.350453000 | O       | 24.934197000 | 13.440504000 | 16.986469000  |
| H                | 13.440450000 | 22.970897000 | 9.530447000  | O       | 26.880944000 | 11.493774000 | 16.986500000  |
| H                | 9.530447000  | 22.970897000 | 13.440450000 | O       | 27.912892000 | 12.408463000 | 14.472437000  |
| H                | 13.440450000 | 22.970897000 | 17.350453000 | O       | 27.912782000 | 14.472319000 | 14.472318000  |
| H                | 15.026933000 | 25.294417000 | 11.853967000 | O       | 28.827591000 | 13.440433000 | 16.986482000  |
| H                | 11.853967000 | 28.467383000 | 11.853967000 | O       | 25.849015000 | 14.472322000 | 12.408582000  |
| H                | 9.530447000  | 26.880900000 | 9.530447000  | O       | 24.934203000 | 16.986468000 | 13.440501000  |
| H                | 15.026933000 | 28.467383000 | 15.026933000 | O       | 27.912889000 | 14.472431000 | 12.408464000  |
| H                | 11.853967000 | 25.294417000 | 15.026933000 | O       | 26.880945000 | 16.986494000 | 11.493769000  |
| H                | 26.787987000 | 23.876329000 | 20.922651000 | O       | 28.827591000 | 16.986480000 | 13.440428000  |
| H                | 26.247804000 | 19.346724000 | 16.467624000 | C       | 23.755332000 | 26.686089000 | 23.755213000  |
| H                | 26.479045000 | 19.251346000 | 22.477714000 | Zr      | 24.236612000 | 26.881475000 | 26.880552000  |
| H                | 27.189478000 | 17.910814000 | 21.041820000 | Zr      | 26.880671000 | 29.524609000 | 26.880680000  |
| H                | 26.563539000 | 21.069692000 | 24.158245000 | Zr      | 29.524440000 | 26.882357000 | 26.881381000  |
| H                | 27.179381000 | 16.211104000 | 19.239193000 | C       | 27.064326000 | 30.008530000 | 23.753165000  |
| Cu               | 25.517728000 | 21.749016000 | 18.240722000 | C       | 30.008123000 | 27.066993000 | 23.753823000  |
| Cl               | 23.650858000 | 21.297688000 | 19.432920000 | C       | 23.755714000 | 23.756676000 | 26.684338000  |
| C                | 25.170271000 | 23.500205000 | 17.451496000 | Zr      | 26.880615000 | 26.881402000 | 29.524137000  |
| C                | 26.217836000 | 23.047198000 | 16.932923000 | C       | 27.065914000 | 23.754135000 | 30.008060000  |
| H                | 27.096113000 | 23.040758000 | 16.315844000 | C       | 30.007964000 | 23.754748000 | 27.067567000  |
| C                | 23.998193000 | 24.312324000 | 17.819178000 | Zr      | 24.236612000 | 13.440798000 | 13.439875000  |
| H                | 24.071947000 | 24.572449000 | 18.880040000 | Zr      | 26.880615000 | 10.797213000 | 13.439948000  |
| H                | 23.094839000 | 23.690250000 | 17.732648000 | C       | 23.755714000 | 13.637012000 | 16.564674000  |
| O                | 23.911659000 | 25.525479000 | 17.101265000 | C       | 27.065914000 | 10.313290000 | 16.567215000  |
| H                | 23.736974000 | 25.299775000 | 16.182562000 | Zr      | 29.524440000 | 13.439969000 | 13.438993000  |
| <b>c. PA/DBU</b> |              |              |              | C       | 30.007964000 | 13.253783000 | 16.566602000  |
| N                | 27.036253000 | 21.818606000 | 20.447387000 | Zr      | 26.880671000 | 13.440670000 | 10.796741000  |
| N                | 26.820839000 | 19.930827000 | 18.457444000 | C       | 23.755332000 | 16.566137000 | 13.635261000  |
| C                | 26.660720000 | 20.577457000 | 20.811707000 | C       | 27.064326000 | 16.568185000 | 10.312820000  |
| C                | 27.024937000 | 22.808301000 | 21.346243000 | C       | 30.008123000 | 16.567527000 | 13.254357000  |
| C                | 26.828098000 | 19.010091000 | 17.475285000 | O       | 23.334855000 | 26.880866000 | 24.934215000  |
| C                | 26.666792000 | 19.530252000 | 19.747284000 | O       | 23.334856000 | 24.934212000 | 26.880862000  |
| C                | 26.284313000 | 20.314613000 | 22.137580000 | O       | 25.848909000 | 27.912895000 | 27.912897000  |
| C                | 26.701459000 | 22.631244000 | 22.699391000 | O       | 23.334862000 | 26.880939000 | 26.887594000  |
| C                | 26.710932000 | 17.628436000 | 17.689848000 | O       | 23.334864000 | 28.827596000 | 28.8280937000 |
| C                | 26.533108000 | 18.166351000 | 20.039320000 | O       | 24.934210000 | 30.426941000 | 26.880925000  |
| C                | 26.329935000 | 21.334706000 | 23.079940000 | O       | 26.880889000 | 30.426939000 | 24.934203000  |
| C                | 26.562999000 | 17.222406000 | 19.022690000 | O       | 26.880879000 | 30.426942000 | 28.827590000  |
| C                | 26.810325000 | 23.730612000 | 23.728978000 | O       | 27.912786000 | 27.912776000 | 27.912777000  |
| C                | 26.810098000 | 16.591849000 | 16.590738000 | O       | 28.827596000 | 30.426944000 | 26.880863000  |
| O                | 26.881204000 | 24.934112000 | 23.334886000 | O       | 30.426933000 | 24.934198000 | 26.880924000  |
| O                | 26.880545000 | 23.335101000 | 24.934208000 | O       | 30.426936000 | 26.880929000 | 24.934199000  |
| O                | 26.880236000 | 15.387100000 | 16.986178000 | O       | 30.426944000 | 26.880866000 | 28.827595000  |
| O                | 26.881598000 | 16.986586000 | 15.387301000 | O       | 30.426946000 | 28.827594000 | 26.880867000  |
| Zr               | 26.878045000 | 26.881615000 | 24.237876000 | O       | 24.934211000 | 26.880924000 | 30.426942000  |
| Zr               | 26.878157000 | 24.239686000 | 26.880719000 | O       | 26.880889000 | 24.934201000 | 30.426937000  |
| Zr               | 26.878194000 | 13.440632000 | 16.081661000 | O       | 26.880878000 | 28.827589000 | 30.426943000  |
| Zr               | 26.878031000 | 16.083475000 | 13.439734000 | O       | 28.827598000 | 26.880862000 | 30.426940000  |
| O                | 24.934203000 | 26.880849000 | 23.334882000 | O       | 25.848909000 | 12.408453000 | 12.408455000  |
| O                | 25.848911000 | 25.848918000 | 25.848917000 | O       | 23.334862000 | 11.493756000 | 13.440411000  |
| O                | 25.849015000 | 27.912768000 | 25.849028000 | O       | 23.334855000 | 15.387135000 | 13.440484000  |
| O                | 27.912782000 | 25.849032000 | 25.849031000 | O       | 23.334864000 | 13.440413000 | 11.493754000  |
| O                | 27.912889000 | 27.912886000 | 25.848919000 | O       | 23.334856000 | 13.440488000 | 15.387138000  |
| O                | 26.880945000 | 28.827581000 | 23.334856000 | O       | 24.934211000 | 9.894408000  | 13.440426000  |
| O                | 28.827591000 | 26.880922000 | 23.334870000 | O       | 26.880889000 | 9.894413000  | 15.387149000  |
| O                | 24.934197000 | 23.334881000 | 26.880846000 | O       | 27.912786000 | 12.408573000 | 12.408574000  |
| O                | 25.849012000 | 25.849025000 | 27.912771000 | O       | 26.880878000 | 9.894407000  | 11.493761000  |
| O                | 27.912892000 | 25.848913000 | 27.912887000 | O       | 28.827598000 | 9.894410000  | 13.440488000  |
| O                | 26.880944000 | 23.334850000 | 28.827576000 | O       | 30.426944000 | 11.493755000 | 13.440484000  |

## ARTICLE

## Journal Name

|    |              |              |              |    |              |              |              |
|----|--------------|--------------|--------------|----|--------------|--------------|--------------|
| O  | 30.426936000 | 15.387151000 | 13.440421000 | C  | 17.333342000 | 21.360638000 | 13.119492000 |
| O  | 30.426946000 | 13.440483000 | 11.493756000 | C  | 18.317452000 | 20.384593000 | 13.104439000 |
| O  | 30.426933000 | 13.440426000 | 15.387152000 | H  | 16.322082000 | 21.176773000 | 12.956594000 |
| O  | 24.934210000 | 13.440425000 | 9.894409000  | H  | 18.007515000 | 19.491341000 | 12.843694000 |
| O  | 26.880879000 | 11.493760000 | 9.894408000  | C  | 22.988008000 | 26.559942000 | 21.360638000 |
| O  | 26.880889000 | 15.387147000 | 9.894411000  | C  | 22.003898000 | 26.544889000 | 20.384593000 |
| O  | 28.827596000 | 13.440487000 | 9.894406000  | H  | 23.999268000 | 26.397044000 | 21.176773000 |
| C  | 23.753697000 | 27.066116000 | 30.007949000 | H  | 22.313835000 | 26.284144000 | 19.491341000 |
| C  | 23.753135000 | 30.008630000 | 27.063604000 | C  | 22.671082000 | 17.650268000 | 13.440450000 |
| C  | 26.696398000 | 30.008246000 | 30.008106000 | C  | 20.687041000 | 19.634387000 | 13.440265000 |
| C  | 30.007968000 | 30.008237000 | 26.695581000 | O  | 13.440450000 | 24.934185000 | 9.894590000  |
| C  | 30.008286000 | 26.697416000 | 30.008420000 | C  | 13.440450000 | 23.727502000 | 10.287052000 |
| C  | 23.753697000 | 10.313401000 | 13.255234000 | O  | 13.440450000 | 24.934185000 | 16.986310000 |
| C  | 23.753135000 | 13.257746000 | 10.312720000 | C  | 13.440450000 | 23.727502000 | 16.593848000 |
| C  | 26.696398000 | 10.313244000 | 10.313104000 | O  | 13.440450000 | 23.335040000 | 15.387165000 |
| C  | 30.008286000 | 10.312930000 | 13.623934000 | O  | 13.440450000 | 23.335040000 | 11.493735000 |
| C  | 30.007968000 | 13.625768000 | 10.313113000 | C  | 18.960712000 | 26.559942000 | 17.333342000 |
| H  | 27.351814000 | 30.759513000 | 23.002127000 | C  | 19.936757000 | 26.544889000 | 18.317452000 |
| H  | 30.758179000 | 27.358190000 | 23.003211000 | H  | 19.144577000 | 26.397044000 | 16.322082000 |
| H  | 23.008991000 | 23.009158000 | 26.377462000 | H  | 20.830009000 | 26.284144000 | 18.007515000 |
| H  | 27.355985000 | 23.003402000 | 30.758391000 | C  | 21.360638000 | 17.333342000 | 13.119492000 |
| H  | 30.757581000 | 23.004153000 | 27.359935000 | C  | 20.384593000 | 18.317452000 | 13.104439000 |
| H  | 23.008991000 | 13.943888000 | 17.312192000 | H  | 21.176773000 | 16.322082000 | 12.956594000 |
| H  | 27.355985000 | 9.562959000  | 17.317948000 | H  | 19.491341000 | 18.007515000 | 12.843694000 |
| H  | 30.757582000 | 12.961415000 | 17.317197000 | C  | 22.988089000 | 18.960801000 | 13.761003000 |
| H  | 27.351814000 | 17.319223000 | 9.561837000  | C  | 22.007719000 | 19.934510000 | 13.779581000 |
| H  | 30.758179000 | 17.318139000 | 12.963160000 | H  | 23.999268000 | 19.144577000 | 13.924306000 |
| H  | 23.003255000 | 27.356162000 | 30.758555000 | H  | 22.309592000 | 20.832730000 | 14.034525000 |
| H  | 23.001913000 | 30.759916000 | 27.349810000 | Zr | 10.956924000 | 26.880900000 | 13.440450000 |
| H  | 26.407446000 | 30.758917000 | 30.758911000 | O  | 9.894590000  | 26.880900000 | 11.493735000 |
| H  | 30.758582000 | 30.758568000 | 26.405278000 | O  | 12.408223000 | 27.913127000 | 14.472677000 |
| H  | 30.759373000 | 26.409850000 | 30.759355000 | C  | 10.287052000 | 26.880900000 | 10.287052000 |
| H  | 23.003255000 | 9.562795000  | 12.965188000 | Zr | 15.923976000 | 26.880900000 | 13.440450000 |
| H  | 23.001913000 | 12.971540000 | 9.561434000  | O  | 16.986310000 | 26.880900000 | 11.493735000 |
| H  | 26.407446000 | 9.562439000  | 9.562434000  | C  | 16.593848000 | 26.880900000 | 10.287052000 |
| H  | 30.759373000 | 9.561995000  | 13.911500000 | O  | 16.986310000 | 26.880900000 | 15.387165000 |
| H  | 30.758582000 | 13.916071000 | 9.562782000  | O  | 14.472677000 | 27.913127000 | 12.408223000 |
| H  | 25.215026000 | 11.776433000 | 15.102845000 | C  | 16.593848000 | 26.880900000 | 16.593848000 |
| H  | 28.544134000 | 11.776251000 | 11.775822000 | C  | 17.650268000 | 26.880900000 | 17.650268000 |
| H  | 28.555271000 | 15.099035000 | 15.098322000 | C  | 19.634347000 | 26.880900000 | 19.634347000 |
| H  | 25.215244000 | 15.103495000 | 11.776660000 | O  | 9.894590000  | 26.880900000 | 15.387165000 |
| H  | 25.215244000 | 28.544690000 | 25.217855000 | C  | 10.287052000 | 26.880900000 | 16.593848000 |
| H  | 28.555271000 | 25.223028000 | 25.222315000 | Zr | 13.440450000 | 26.880900000 | 15.923976000 |
| H  | 28.544134000 | 28.545528000 | 28.545099000 | O  | 11.493735000 | 26.880900000 | 16.986310000 |
| H  | 25.215026000 | 25.218505000 | 28.544917000 | O  | 14.472677000 | 27.913127000 | 14.472677000 |
| O  | 14.472677000 | 25.848673000 | 14.472677000 | Zr | 13.440450000 | 26.880900000 | 10.956924000 |
| O  | 12.408223000 | 25.848673000 | 12.408223000 | O  | 11.493735000 | 26.880900000 | 9.894590000  |
| O  | 14.472677000 | 25.848673000 | 12.408223000 | O  | 15.387165000 | 26.880900000 | 9.894590000  |
| O  | 12.408223000 | 25.848673000 | 14.472677000 | O  | 12.408223000 | 27.913127000 | 12.408223000 |
| Zr | 13.440450000 | 24.397374000 | 13.440450000 | O  | 15.387165000 | 26.880900000 | 16.986310000 |
| O  | 11.493735000 | 23.335040000 | 13.440450000 | Zr | 13.440450000 | 29.364426000 | 13.440450000 |
| C  | 10.287052000 | 23.727502000 | 13.440450000 | O  | 11.493735000 | 30.426760000 | 13.440450000 |
| O  | 15.387165000 | 23.335040000 | 13.440450000 | C  | 10.287052000 | 30.034298000 | 13.440450000 |
| C  | 16.593848000 | 23.727502000 | 13.440450000 | O  | 15.387165000 | 30.426760000 | 13.440450000 |
| C  | 17.650268000 | 22.671082000 | 13.440450000 | C  | 16.593848000 | 30.034298000 | 13.440450000 |
| C  | 19.634347000 | 20.687003000 | 13.440450000 | O  | 16.986310000 | 28.827615000 | 13.440450000 |
| C  | 18.960712000 | 22.988008000 | 13.761408000 | O  | 9.894590000  | 28.827615000 | 13.440450000 |
| C  | 19.936757000 | 22.003898000 | 13.776461000 | C  | 22.671082000 | 26.880900000 | 22.671082000 |
| H  | 19.144577000 | 23.999268000 | 13.924306000 | C  | 20.687003000 | 26.880900000 | 20.687003000 |
| H  | 20.830009000 | 22.313835000 | 14.037206000 | C  | 21.360638000 | 27.201858000 | 22.988008000 |
| O  | 9.894590000  | 24.934185000 | 13.440450000 | C  | 20.384593000 | 27.216911000 | 22.003898000 |
| O  | 16.986310000 | 24.934185000 | 13.440450000 | H  | 21.176773000 | 27.364756000 | 23.999268000 |

| Journal Name |              |              |              | ARTICLE                         |              |              |              |
|--------------|--------------|--------------|--------------|---------------------------------|--------------|--------------|--------------|
| H            | 19.491341000 | 27.477656000 | 22.313835000 | H                               | 26.297852000 | 21.515121000 | 14.051677000 |
| O            | 13.440450000 | 28.827615000 | 16.986310000 | H                               | 26.372599000 | 22.125734000 | 15.714739000 |
| C            | 13.440450000 | 30.034298000 | 16.593848000 | H                               | 25.649829000 | 26.519548000 | 16.623750000 |
| O            | 13.440450000 | 28.827615000 | 9.894590000  | H                               | 24.463483000 | 25.487997000 | 17.405124000 |
| C            | 13.440450000 | 30.034298000 | 10.287052000 | H                               | 22.889606000 | 24.310215000 | 16.844220000 |
| O            | 13.440450000 | 30.426760000 | 15.387165000 | H                               | 22.357264000 | 23.052294000 | 15.768371000 |
| O            | 13.440450000 | 30.426760000 | 11.493735000 | <b>d. PA/DBU/CO<sub>2</sub></b> |              |              |              |
| C            | 17.333342000 | 27.201858000 | 18.960712000 | N                               | 27.047299000 | 21.813903000 | 20.452799000 |
| C            | 18.317452000 | 27.216911000 | 19.936757000 | N                               | 26.837070000 | 19.927216000 | 18.461409000 |
| H            | 16.322082000 | 27.364756000 | 19.144577000 | C                               | 26.666819000 | 20.573679000 | 20.815639000 |
| H            | 18.007515000 | 27.477656000 | 20.830009000 | C                               | 27.034353000 | 22.804558000 | 21.350407000 |
| H            | 13.440450000 | 30.790903000 | 9.530447000  | C                               | 26.841263000 | 19.008025000 | 17.478090000 |
| H            | 17.350453000 | 26.880900000 | 9.530447000  | C                               | 26.672558000 | 19.527027000 | 19.750432000 |
| H            | 17.350453000 | 30.790903000 | 13.440450000 | C                               | 26.284559000 | 20.312926000 | 22.140078000 |
| H            | 13.440450000 | 30.790903000 | 17.350453000 | C                               | 26.702739000 | 22.629700000 | 22.701308000 |
| H            | 9.530447000  | 30.790903000 | 13.440450000 | C                               | 26.712368000 | 17.627380000 | 17.690560000 |
| H            | 9.530447000  | 26.880900000 | 17.350453000 | C                               | 26.526817000 | 18.163942000 | 20.039860000 |
| H            | 13.440450000 | 22.970897000 | 9.530447000  | C                               | 26.327275000 | 21.334247000 | 23.081501000 |
| H            | 9.530447000  | 22.970897000 | 13.440450000 | C                               | 26.555140000 | 17.220983000 | 19.022198000 |
| H            | 13.440450000 | 22.970897000 | 17.350453000 | C                               | 26.810210000 | 23.730625000 | 23.729014000 |
| H            | 15.026933000 | 25.294417000 | 11.853967000 | C                               | 26.810074000 | 16.591978000 | 16.590624000 |
| H            | 11.853967000 | 28.467383000 | 11.853967000 | O                               | 26.881113000 | 24.934118000 | 23.334889000 |
| H            | 9.530447000  | 26.880900000 | 9.530447000  | O                               | 26.880724000 | 23.335085000 | 24.934193000 |
| H            | 15.026933000 | 28.467383000 | 15.026933000 | O                               | 26.880549000 | 15.387139000 | 16.986241000 |
| H            | 11.853967000 | 25.294417000 | 15.026933000 | O                               | 26.881320000 | 16.986565000 | 15.387278000 |
| H            | 27.308099000 | 23.792391000 | 20.976983000 | Zr                              | 26.878058000 | 26.881615000 | 24.237877000 |
| H            | 26.948582000 | 19.396504000 | 16.465270000 | Zr                              | 26.878146000 | 24.239685000 | 26.880719000 |
| H            | 25.953340000 | 19.325927000 | 22.439529000 | Zr                              | 26.878162000 | 13.440631000 | 16.081664000 |
| H            | 26.431923000 | 17.837332000 | 21.068167000 | Zr                              | 26.878061000 | 16.083473000 | 13.439735000 |
| H            | 26.073061000 | 21.141661000 | 24.117160000 | O                               | 24.934203000 | 26.880849000 | 23.334882000 |
| H            | 26.486429000 | 16.162895000 | 19.245361000 | O                               | 25.848911000 | 25.848918000 | 25.848917000 |
| Cu           | 26.991640000 | 21.986172000 | 18.164954000 | O                               | 25.849015000 | 27.912768000 | 25.849028000 |
| Cl           | 24.812836000 | 22.696074000 | 18.295092000 | O                               | 27.912782000 | 25.849032000 | 25.849031000 |
| C            | 28.135185000 | 23.562772000 | 17.645694000 | O                               | 27.912889000 | 27.912886000 | 25.848919000 |
| C            | 28.713987000 | 22.506173000 | 17.316289000 | O                               | 26.880945000 | 28.827581000 | 23.334856000 |
| H            | 29.484202000 | 21.869474000 | 16.925440000 | O                               | 28.827591000 | 26.880922000 | 23.334870000 |
| C            | 27.733625000 | 24.969077000 | 17.880091000 | O                               | 24.934197000 | 23.334881000 | 26.880846000 |
| H            | 28.199754000 | 25.296607000 | 18.819439000 | O                               | 25.849012000 | 25.849025000 | 27.912771000 |
| H            | 26.643350000 | 24.987118000 | 18.047103000 | O                               | 27.912892000 | 25.848913000 | 27.912887000 |
| O            | 28.153544000 | 25.832634000 | 16.867998000 | O                               | 26.880944000 | 23.334850000 | 28.827576000 |
| H            | 27.596820000 | 25.584649000 | 16.081241000 | O                               | 28.827591000 | 23.334868000 | 26.880917000 |
| C            | 22.841155000 | 26.330167000 | 14.717876000 | O                               | 25.849012000 | 12.408579000 | 14.472325000 |
| C            | 23.612728000 | 26.857694000 | 15.923797000 | O                               | 25.848911000 | 14.472433000 | 14.472432000 |
| C            | 24.743647000 | 25.935992000 | 16.442506000 | O                               | 24.934197000 | 13.440504000 | 16.986469000 |
| C            | 22.042456000 | 25.058501000 | 14.987437000 | O                               | 26.880944000 | 11.493774000 | 16.986500000 |
| C            | 25.148825000 | 24.798993000 | 15.539058000 | O                               | 27.912892000 | 12.408463000 | 14.472437000 |
| C            | 22.840828000 | 24.032615000 | 15.784020000 | O                               | 27.912782000 | 14.472319000 | 14.472318000 |
| N            | 24.189094000 | 23.866713000 | 15.262209000 | O                               | 28.827591000 | 13.440433000 | 16.986482000 |
| H            | 22.169349000 | 27.110735000 | 14.343203000 | O                               | 25.849015000 | 14.472322000 | 12.408582000 |
| H            | 21.723253000 | 24.630004000 | 14.029576000 | O                               | 24.934203000 | 16.986468000 | 13.440501000 |
| C            | 26.731707000 | 23.642695000 | 14.254026000 | O                               | 27.912889000 | 14.472431000 | 12.408464000 |
| N            | 26.369273000 | 24.772340000 | 15.090450000 | O                               | 26.880945000 | 16.986494000 | 11.493769000 |
| C            | 26.040755000 | 22.363881000 | 14.695379000 | O                               | 28.827591000 | 16.986480000 | 13.440428000 |
| C            | 24.541428000 | 22.565126000 | 14.709905000 | C                               | 23.755332000 | 26.686089000 | 23.755213000 |
| H            | 24.075788000 | 21.800907000 | 15.345971000 | Zr                              | 24.236612000 | 26.881475000 | 26.880552000 |
| H            | 27.821570000 | 23.524925000 | 14.289245000 | Zr                              | 26.880671000 | 29.524609000 | 26.880680000 |
| H            | 23.555135000 | 26.135795000 | 13.906936000 | Zr                              | 29.524440000 | 26.882357000 | 26.881381000 |
| H            | 21.127344000 | 25.288585000 | 15.544719000 | C                               | 27.064326000 | 30.008530000 | 23.753165000 |
| H            | 24.120113000 | 22.466320000 | 13.696629000 | C                               | 30.008123000 | 27.066993000 | 23.753823000 |
| H            | 26.477373000 | 23.862398000 | 13.203667000 | C                               | 23.755714000 | 23.756676000 | 26.684338000 |
| H            | 22.913577000 | 27.067420000 | 16.743141000 | Zr                              | 26.880615000 | 26.881402000 | 29.524137000 |
| H            | 24.047095000 | 27.824844000 | 15.650357000 | C                               | 27.065914000 | 23.754135000 | 30.008060000 |

## ARTICLE

## Journal Name

|    |              |              |              |    |              |              |              |
|----|--------------|--------------|--------------|----|--------------|--------------|--------------|
| C  | 30.007964000 | 23.754748000 | 27.067567000 | H  | 23.008991000 | 13.943888000 | 17.312192000 |
| Zr | 24.236612000 | 13.440798000 | 13.439875000 | H  | 27.355985000 | 9.562959000  | 17.317948000 |
| Zr | 26.880615000 | 10.797213000 | 13.439948000 | H  | 30.757582000 | 12.961415000 | 17.317197000 |
| C  | 23.755714000 | 13.637012000 | 16.564674000 | H  | 27.351814000 | 17.319223000 | 9.561837000  |
| C  | 27.065914000 | 10.313290000 | 16.567215000 | H  | 30.758179000 | 17.318139000 | 12.963160000 |
| Zr | 29.524440000 | 13.439969000 | 13.438993000 | H  | 23.003255000 | 27.356162000 | 30.758555000 |
| C  | 30.007964000 | 13.253783000 | 16.566602000 | H  | 23.001913000 | 30.759916000 | 27.349810000 |
| Zr | 26.880671000 | 13.440670000 | 10.796741000 | H  | 26.407446000 | 30.758917000 | 30.758911000 |
| C  | 23.755332000 | 16.566137000 | 13.635261000 | H  | 30.758582000 | 30.758568000 | 26.405278000 |
| C  | 27.064326000 | 16.568185000 | 10.312820000 | H  | 30.759373000 | 26.409850000 | 30.759355000 |
| C  | 30.008123000 | 16.567527000 | 13.254357000 | H  | 23.003255000 | 9.562795000  | 12.965188000 |
| O  | 23.334855000 | 26.880866000 | 24.934215000 | H  | 23.001913000 | 12.971540000 | 9.561434000  |
| O  | 23.334856000 | 24.934212000 | 26.880862000 | H  | 26.407446000 | 9.562439000  | 9.562434000  |
| O  | 25.848909000 | 27.912895000 | 27.912897000 | H  | 30.759373000 | 9.561995000  | 13.911500000 |
| O  | 23.334862000 | 26.880939000 | 28.827594000 | H  | 30.758582000 | 13.916071000 | 9.562782000  |
| O  | 23.334864000 | 28.827596000 | 26.880937000 | H  | 25.215026000 | 11.776433000 | 15.102845000 |
| O  | 24.934210000 | 30.426941000 | 26.880925000 | H  | 28.544134000 | 11.776251000 | 11.775822000 |
| O  | 26.880889000 | 30.426939000 | 24.934203000 | H  | 28.555271000 | 15.099035000 | 15.098322000 |
| O  | 26.880879000 | 30.426942000 | 28.827590000 | H  | 25.215244000 | 15.103495000 | 11.776660000 |
| O  | 27.912786000 | 27.912776000 | 27.912777000 | H  | 25.215244000 | 28.544690000 | 25.217855000 |
| O  | 28.827596000 | 30.426944000 | 26.880863000 | H  | 28.555271000 | 25.223028000 | 25.222315000 |
| O  | 30.426933000 | 24.934198000 | 26.880924000 | H  | 28.544134000 | 28.545528000 | 28.545099000 |
| O  | 30.426936000 | 26.880929000 | 24.934199000 | H  | 25.215026000 | 25.218505000 | 28.544917000 |
| O  | 30.426944000 | 26.880866000 | 28.827595000 | O  | 14.472677000 | 25.848673000 | 14.472677000 |
| O  | 30.426946000 | 28.827594000 | 26.880867000 | O  | 12.408223000 | 25.848673000 | 12.408223000 |
| O  | 24.934211000 | 26.880924000 | 30.426942000 | O  | 14.472677000 | 25.848673000 | 12.408223000 |
| O  | 26.880889000 | 24.934201000 | 30.426937000 | O  | 12.408223000 | 25.848673000 | 14.472677000 |
| O  | 26.880878000 | 28.827589000 | 30.426943000 | Zr | 13.440450000 | 24.397374000 | 13.440450000 |
| O  | 28.827598000 | 26.880862000 | 30.426940000 | O  | 11.493735000 | 23.335040000 | 13.440450000 |
| O  | 25.848909000 | 12.408453000 | 12.408455000 | C  | 10.287052000 | 23.727502000 | 13.440450000 |
| O  | 23.334862000 | 11.493756000 | 13.440411000 | O  | 15.387165000 | 23.335040000 | 13.440450000 |
| O  | 23.334855000 | 15.387135000 | 13.440484000 | C  | 16.593848000 | 23.727502000 | 13.440450000 |
| O  | 23.334864000 | 13.440413000 | 11.493754000 | C  | 17.650268000 | 22.671082000 | 13.440450000 |
| O  | 23.334856000 | 13.440488000 | 15.387138000 | C  | 19.634347000 | 20.687003000 | 13.440450000 |
| O  | 24.934211000 | 9.894408000  | 13.440426000 | C  | 18.960712000 | 22.988008000 | 13.761408000 |
| O  | 26.880889000 | 9.894413000  | 15.387149000 | C  | 19.936757000 | 22.003898000 | 13.776461000 |
| O  | 27.912786000 | 12.408573000 | 12.408574000 | H  | 19.144577000 | 23.999268000 | 13.924306000 |
| O  | 26.880878000 | 9.894407000  | 11.493761000 | H  | 20.830009000 | 22.313835000 | 14.037206000 |
| O  | 28.827598000 | 9.894410000  | 13.440488000 | O  | 9.894590000  | 24.934185000 | 13.440450000 |
| O  | 30.426944000 | 11.493755000 | 13.440484000 | O  | 16.986310000 | 24.934185000 | 13.440450000 |
| O  | 30.426936000 | 15.387151000 | 13.440421000 | C  | 17.333342000 | 21.360638000 | 13.119492000 |
| O  | 30.426946000 | 13.440483000 | 11.493756000 | C  | 18.317452000 | 20.384593000 | 13.104439000 |
| O  | 30.426933000 | 13.440426000 | 15.387152000 | H  | 16.322082000 | 21.176773000 | 12.956594000 |
| O  | 24.934210000 | 13.440425000 | 9.894409000  | H  | 18.007515000 | 19.491341000 | 12.843694000 |
| O  | 26.880879000 | 11.493760000 | 9.894408000  | C  | 22.988008000 | 26.559942000 | 21.360638000 |
| O  | 26.880889000 | 15.387147000 | 9.894411000  | C  | 22.003898000 | 26.544889000 | 20.384593000 |
| O  | 28.827596000 | 13.440487000 | 9.894406000  | H  | 23.999268000 | 26.397044000 | 21.176773000 |
| C  | 23.753697000 | 27.066116000 | 30.007949000 | H  | 22.313835000 | 26.284144000 | 19.491341000 |
| C  | 23.753135000 | 30.008630000 | 27.063604000 | C  | 22.671082000 | 17.650268000 | 13.440450000 |
| C  | 26.696398000 | 30.008246000 | 30.008106000 | C  | 20.687171000 | 19.634522000 | 13.439640000 |
| C  | 30.007968000 | 30.008237000 | 26.695581000 | O  | 13.440450000 | 24.934185000 | 9.894590000  |
| C  | 30.008286000 | 26.697416000 | 30.008420000 | C  | 13.440450000 | 23.727502000 | 10.287052000 |
| C  | 23.753697000 | 10.313401000 | 13.255234000 | O  | 13.440450000 | 24.934185000 | 16.986310000 |
| C  | 23.753135000 | 13.257746000 | 10.312720000 | C  | 13.440450000 | 23.727502000 | 16.593848000 |
| C  | 26.696398000 | 10.313244000 | 10.313104000 | O  | 13.440450000 | 23.335040000 | 15.387165000 |
| C  | 30.008286000 | 10.312930000 | 13.623934000 | O  | 13.440450000 | 23.335040000 | 11.493735000 |
| C  | 30.007968000 | 13.625768000 | 10.313113000 | C  | 18.960712000 | 26.559942000 | 17.333342000 |
| H  | 27.351814000 | 30.759513000 | 23.002127000 | C  | 19.936757000 | 26.544889000 | 18.317452000 |
| H  | 30.758179000 | 27.358190000 | 23.003211000 | H  | 19.144577000 | 26.397044000 | 16.322082000 |
| H  | 23.008991000 | 23.009158000 | 26.377462000 | H  | 20.830009000 | 26.284144000 | 18.007515000 |
| H  | 27.355985000 | 23.003402000 | 30.758391000 | C  | 21.360638000 | 17.333342000 | 13.119492000 |
| H  | 30.757581000 | 23.004153000 | 27.359935000 | C  | 20.384593000 | 18.317452000 | 13.104439000 |

| Journal Name |              |              |              | ARTICLE       |              |              |              |
|--------------|--------------|--------------|--------------|---------------|--------------|--------------|--------------|
| H            | 21.176773000 | 16.322082000 | 12.956594000 | H             | 9.530447000  | 26.880900000 | 9.530447000  |
| H            | 19.491341000 | 18.007515000 | 12.843694000 | H             | 15.026933000 | 28.467383000 | 15.026933000 |
| C            | 22.988074000 | 18.960785000 | 13.761074000 | H             | 11.853967000 | 25.294417000 | 15.026933000 |
| C            | 22.006448000 | 19.934777000 | 13.780298000 | H             | 27.322808000 | 23.788032000 | 20.983522000 |
| H            | 23.999268000 | 19.144577000 | 13.924306000 | H             | 26.969113000 | 19.394435000 | 16.469044000 |
| H            | 22.310760000 | 20.832199000 | 14.034408000 | H             | 25.950993000 | 19.325078000 | 22.441899000 |
| Zr           | 10.956924000 | 26.880900000 | 13.440450000 | H             | 26.416726000 | 17.834526000 | 21.067648000 |
| O            | 9.894590000  | 26.880900000 | 11.493735000 | H             | 26.065324000 | 21.142738000 | 24.117734000 |
| O            | 12.408223000 | 27.913127000 | 14.472677000 | H             | 26.469560000 | 16.161839000 | 19.243304000 |
| C            | 10.287052000 | 26.880900000 | 10.287052000 | Cu            | 26.991615000 | 21.979804000 | 18.181964000 |
| Zr           | 15.923976000 | 26.880900000 | 13.440450000 | Cl            | 24.790660000 | 22.633579000 | 18.326637000 |
| O            | 16.986310000 | 26.880900000 | 11.493735000 | C             | 28.100769000 | 23.597854000 | 17.718666000 |
| C            | 16.593848000 | 26.880900000 | 10.287052000 | C             | 28.693723000 | 22.570597000 | 17.329771000 |
| O            | 16.986310000 | 26.880900000 | 15.387165000 | H             | 29.470624000 | 21.968846000 | 16.899024000 |
| O            | 14.472677000 | 27.913127000 | 12.408223000 | C             | 27.660265000 | 24.966882000 | 18.056451000 |
| C            | 16.593848000 | 26.880900000 | 16.593848000 | H             | 28.134509000 | 25.253245000 | 19.004076000 |
| C            | 17.650268000 | 26.880900000 | 17.650268000 | H             | 26.572536000 | 24.939293000 | 18.243150000 |
| C            | 19.634347000 | 26.880900000 | 19.634347000 | O             | 28.025973000 | 25.918674000 | 17.096094000 |
| O            | 9.894590000  | 26.880900000 | 15.387165000 | H             | 27.503945000 | 25.665612000 | 16.283626000 |
| C            | 10.287052000 | 26.880900000 | 16.593848000 | C             | 22.825987000 | 26.328675000 | 14.821353000 |
| Zr           | 13.440450000 | 26.880900000 | 15.923976000 | C             | 23.577546000 | 26.837914000 | 16.047838000 |
| O            | 11.493735000 | 26.880900000 | 16.986310000 | C             | 24.669681000 | 25.889180000 | 16.594981000 |
| O            | 14.472677000 | 27.913127000 | 14.472677000 | C             | 22.029126000 | 25.046216000 | 15.043259000 |
| Zr           | 13.440450000 | 26.880900000 | 10.956924000 | C             | 25.121029000 | 24.793205000 | 15.665282000 |
| O            | 11.493735000 | 26.880900000 | 9.894590000  | C             | 22.819472000 | 23.992462000 | 15.812208000 |
| O            | 15.387165000 | 26.880900000 | 9.894590000  | N             | 24.182398000 | 23.863485000 | 15.318260000 |
| O            | 12.408223000 | 27.913127000 | 12.408223000 | H             | 22.156855000 | 27.113795000 | 14.451491000 |
| O            | 15.387165000 | 26.880900000 | 16.986310000 | H             | 21.721364000 | 24.650007000 | 14.067783000 |
| Zr           | 13.440450000 | 29.364426000 | 13.440450000 | C             | 26.753951000 | 23.717181000 | 14.375090000 |
| O            | 11.493735000 | 30.426760000 | 13.440450000 | N             | 26.354926000 | 24.801685000 | 15.253358000 |
| C            | 10.287052000 | 30.034298000 | 13.440450000 | C             | 26.069550000 | 22.410239000 | 14.738482000 |
| O            | 15.387165000 | 30.426760000 | 13.440450000 | C             | 24.566789000 | 22.587859000 | 14.728085000 |
| C            | 16.593848000 | 30.034298000 | 13.440450000 | H             | 24.101299000 | 21.793816000 | 15.326694000 |
| O            | 16.986310000 | 28.827615000 | 13.440450000 | H             | 27.843971000 | 23.610336000 | 14.433091000 |
| O            | 9.894590000  | 28.827615000 | 13.440450000 | H             | 23.554349000 | 26.155202000 | 14.018498000 |
| C            | 22.671082000 | 26.880900000 | 22.671082000 | H             | 21.106863000 | 25.253342000 | 15.597080000 |
| C            | 20.687003000 | 26.880900000 | 20.687003000 | H             | 24.165346000 | 22.517467000 | 13.704491000 |
| C            | 21.360638000 | 27.201858000 | 22.988008000 | H             | 26.523178000 | 23.983313000 | 13.330080000 |
| C            | 20.384593000 | 27.216911000 | 22.003898000 | H             | 22.865828000 | 27.067943000 | 16.850052000 |
| H            | 21.176773000 | 27.364756000 | 23.999268000 | H             | 24.047882000 | 27.791989000 | 15.786347000 |
| H            | 19.491341000 | 27.477656000 | 22.313835000 | H             | 26.354840000 | 21.596198000 | 14.062711000 |
| O            | 13.440450000 | 28.827615000 | 16.986310000 | H             | 26.381655000 | 22.129425000 | 15.753135000 |
| C            | 13.440450000 | 30.034298000 | 16.593848000 | H             | 25.563320000 | 26.465371000 | 16.841123000 |
| O            | 13.440450000 | 28.827615000 | 9.894590000  | H             | 24.338693000 | 25.404837000 | 17.522822000 |
| C            | 13.440450000 | 30.034298000 | 10.287052000 | H             | 22.838576000 | 24.219762000 | 16.885040000 |
| O            | 13.440450000 | 30.426760000 | 15.387165000 | H             | 22.347891000 | 23.009220000 | 15.739143000 |
| O            | 13.440450000 | 30.426760000 | 11.493735000 | C             | 27.169625000 | 28.239656000 | 18.368206000 |
| C            | 17.333342000 | 27.201858000 | 18.960712000 | O             | 27.568480000 | 27.808832000 | 19.379980000 |
| C            | 18.317452000 | 27.216911000 | 19.936757000 | O             | 26.747372000 | 28.722601000 | 17.390405000 |
| H            | 16.322082000 | 27.364756000 | 19.144577000 | <b>e. TS1</b> |              |              |              |
| H            | 18.007515000 | 27.477656000 | 20.830009000 | N             | 26.501017000 | 21.880040000 | 20.392192000 |
| H            | 13.440450000 | 30.790903000 | 9.530447000  | N             | 26.798505000 | 19.929822000 | 18.432597000 |
| H            | 17.350453000 | 26.880900000 | 9.530447000  | C             | 26.655722000 | 20.598117000 | 20.779866000 |
| H            | 17.350453000 | 30.790903000 | 13.440450000 | C             | 26.546951000 | 22.853577000 | 21.311155000 |
| H            | 13.440450000 | 30.790903000 | 17.350453000 | C             | 26.801524000 | 19.000849000 | 17.459423000 |
| H            | 9.530447000  | 30.790903000 | 13.440450000 | C             | 26.643459000 | 19.544910000 | 19.721015000 |
| H            | 9.530447000  | 26.880900000 | 17.350453000 | C             | 26.838776000 | 20.281294000 | 22.135280000 |
| H            | 13.440450000 | 22.970897000 | 9.530447000  | C             | 26.716920000 | 22.633003000 | 22.690340000 |
| H            | 9.530447000  | 22.970897000 | 13.440450000 | C             | 26.701563000 | 17.624163000 | 17.686434000 |
| H            | 13.440450000 | 22.970897000 | 17.350453000 | C             | 26.481694000 | 18.183980000 | 20.025846000 |
| H            | 15.026933000 | 25.294417000 | 11.853967000 | C             | 26.855627000 | 21.295180000 | 23.083575000 |
| H            | 11.853967000 | 28.467383000 | 11.853967000 | C             | 26.527996000 | 17.229372000 | 19.020799000 |

## ARTICLE

## Journal Name

|    |              |              |              |   |              |              |              |
|----|--------------|--------------|--------------|---|--------------|--------------|--------------|
| C  | 26.809925000 | 23.730886000 | 23.728973000 | O | 27.912786000 | 27.912776000 | 27.912777000 |
| C  | 26.809925000 | 16.592377000 | 16.590464000 | O | 28.827596000 | 30.426944000 | 26.880863000 |
| O  | 26.880885000 | 24.934153000 | 23.334955000 | O | 30.426933000 | 24.934198000 | 26.880924000 |
| O  | 26.880903000 | 23.334945000 | 24.934136000 | O | 30.426936000 | 26.880929000 | 24.934199000 |
| O  | 26.880903000 | 15.387214000 | 16.986405000 | O | 30.426944000 | 26.880866000 | 28.827595000 |
| O  | 26.880885000 | 16.986395000 | 15.387197000 | O | 30.426946000 | 28.827594000 | 26.880867000 |
| Zr | 26.878142000 | 26.881612000 | 24.237883000 | O | 24.934211000 | 26.880924000 | 30.426942000 |
| Zr | 26.878209000 | 24.239690000 | 26.880717000 | O | 26.880889000 | 24.934201000 | 30.426937000 |
| Zr | 26.878209000 | 13.440633000 | 16.081660000 | O | 26.880878000 | 28.827589000 | 30.426943000 |
| Zr | 26.878142000 | 16.083467000 | 13.439738000 | O | 28.827598000 | 26.880862000 | 30.426940000 |
| O  | 24.934203000 | 26.880849000 | 23.334882000 | O | 25.848909000 | 12.408453000 | 12.408455000 |
| O  | 25.848911000 | 25.848918000 | 25.848917000 | O | 23.334862000 | 11.493756000 | 13.440411000 |
| O  | 25.849015000 | 27.912768000 | 25.849028000 | O | 23.334855000 | 15.387135000 | 13.440484000 |
| O  | 27.912782000 | 25.849032000 | 25.849031000 | O | 23.334864000 | 13.440413000 | 11.493754000 |
| O  | 27.912889000 | 27.912886000 | 25.848919000 | O | 23.334856000 | 13.440488000 | 15.387138000 |
| O  | 26.880945000 | 28.827581000 | 23.334856000 | O | 24.934211000 | 9.894408000  | 13.440426000 |
| O  | 28.827591000 | 26.880922000 | 23.334870000 | O | 26.880889000 | 9.894413000  | 15.387149000 |
| O  | 24.934197000 | 23.334881000 | 26.880846000 | O | 27.912786000 | 12.408573000 | 12.408574000 |
| O  | 25.849012000 | 25.849025000 | 27.912771000 | O | 26.880878000 | 9.894407000  | 11.493761000 |
| O  | 27.912892000 | 25.848913000 | 27.912887000 | O | 28.827598000 | 9.894410000  | 13.440488000 |
| O  | 26.880944000 | 23.334850000 | 28.827576000 | O | 30.426944000 | 11.493755000 | 13.440484000 |
| O  | 28.827591000 | 23.334868000 | 26.880917000 | O | 30.426936000 | 15.387151000 | 13.440421000 |
| O  | 25.849012000 | 12.408579000 | 14.472325000 | O | 30.426946000 | 13.440483000 | 11.493756000 |
| O  | 25.848911000 | 14.472433000 | 14.472432000 | O | 30.426933000 | 13.440426000 | 15.387152000 |
| O  | 24.934197000 | 13.440504000 | 16.986469000 | O | 24.934210000 | 13.440425000 | 9.894409000  |
| O  | 26.880944000 | 11.493774000 | 16.986500000 | O | 26.880879000 | 11.493760000 | 9.894408000  |
| O  | 27.912892000 | 12.408463000 | 14.472437000 | O | 26.880889000 | 15.387147000 | 9.894411000  |
| O  | 27.912782000 | 14.472319000 | 14.472318000 | O | 28.827596000 | 13.440487000 | 9.894406000  |
| O  | 28.827591000 | 13.440433000 | 16.986482000 | C | 23.753697000 | 27.066116000 | 30.007949000 |
| O  | 25.849015000 | 14.472322000 | 12.408582000 | C | 23.753135000 | 30.008630000 | 27.063604000 |
| O  | 24.934203000 | 16.986468000 | 13.440501000 | C | 26.696398000 | 30.008246000 | 30.008106000 |
| O  | 27.912889000 | 14.472431000 | 12.408464000 | C | 30.007968000 | 30.008237000 | 26.695581000 |
| O  | 26.880945000 | 16.986494000 | 11.493769000 | C | 30.008286000 | 26.697416000 | 30.008420000 |
| O  | 28.827591000 | 16.986480000 | 13.440428000 | C | 23.753697000 | 10.313401000 | 13.255234000 |
| C  | 23.755332000 | 26.686089000 | 23.755213000 | C | 23.753135000 | 13.257746000 | 10.312720000 |
| Zr | 24.236612000 | 26.881475000 | 26.880552000 | C | 26.696398000 | 10.313244000 | 10.313104000 |
| Zr | 26.880671000 | 29.524609000 | 26.880680000 | C | 30.008286000 | 10.312930000 | 13.623934000 |
| Zr | 29.524440000 | 26.882357000 | 26.881381000 | C | 30.007968000 | 13.625768000 | 10.313113000 |
| C  | 27.064326000 | 30.008530000 | 23.753165000 | H | 27.351814000 | 30.759513000 | 23.002127000 |
| C  | 30.008123000 | 27.066993000 | 23.753823000 | H | 30.758179000 | 27.358190000 | 23.003211000 |
| C  | 23.755714000 | 23.756676000 | 26.684338000 | H | 23.008991000 | 23.009158000 | 26.377462000 |
| Zr | 26.880615000 | 26.881402000 | 29.524137000 | H | 27.355985000 | 23.003402000 | 30.758391000 |
| C  | 27.065914000 | 23.754135000 | 30.008060000 | H | 30.757581000 | 23.004153000 | 27.359935000 |
| C  | 30.007964000 | 23.754748000 | 27.067567000 | H | 23.008991000 | 13.943888000 | 17.312192000 |
| Zr | 24.236612000 | 13.440798000 | 13.439875000 | H | 27.355985000 | 9.562959000  | 17.317948000 |
| Zr | 26.880615000 | 10.797213000 | 13.439948000 | H | 30.757582000 | 12.961415000 | 17.317197000 |
| C  | 23.755714000 | 13.637012000 | 16.564674000 | H | 27.351814000 | 17.319223000 | 9.561837000  |
| C  | 27.065914000 | 10.313290000 | 16.567215000 | H | 30.758179000 | 17.318139000 | 12.963160000 |
| Zr | 29.524440000 | 13.439969000 | 13.438993000 | H | 23.003255000 | 27.356162000 | 30.758555000 |
| C  | 30.007964000 | 13.253783000 | 16.566602000 | H | 23.001913000 | 30.759916000 | 27.349810000 |
| Zr | 26.880671000 | 13.440670000 | 10.796741000 | H | 26.407446000 | 30.758917000 | 30.758911000 |
| C  | 23.755332000 | 16.566137000 | 13.635261000 | H | 30.758582000 | 30.758568000 | 26.405278000 |
| C  | 27.064326000 | 16.568185000 | 10.312820000 | H | 30.759373000 | 26.409850000 | 30.759355000 |
| C  | 30.008123000 | 16.567527000 | 13.254357000 | H | 23.003255000 | 9.562795000  | 12.965188000 |
| O  | 23.334855000 | 26.880866000 | 24.934215000 | H | 23.001913000 | 12.971540000 | 9.561434000  |
| O  | 23.334856000 | 24.934212000 | 26.880862000 | H | 26.407446000 | 9.562439000  | 9.562434000  |
| O  | 25.848909000 | 27.912895000 | 27.912897000 | H | 30.759373000 | 9.561995000  | 13.911500000 |
| O  | 23.334862000 | 26.880939000 | 28.827594000 | H | 30.758582000 | 13.916071000 | 9.562782000  |
| O  | 23.334864000 | 28.827596000 | 26.880937000 | H | 25.215026000 | 11.776433000 | 15.102845000 |
| O  | 24.934210000 | 30.426941000 | 26.880925000 | H | 28.544134000 | 11.776251000 | 11.775822000 |
| O  | 26.880889000 | 30.426939000 | 24.934203000 | H | 28.555271000 | 15.099035000 | 15.098322000 |
| O  | 26.880879000 | 30.426942000 | 28.827590000 | H | 25.215244000 | 15.103495000 | 11.776660000 |

| Journal Name |              |              |              | ARTICLE |              |              |              |
|--------------|--------------|--------------|--------------|---------|--------------|--------------|--------------|
| H            | 25.215244000 | 28.544690000 | 25.217855000 | C       | 10.287052000 | 26.880900000 | 16.593848000 |
| H            | 28.555271000 | 25.223028000 | 25.222315000 | Zr      | 13.440450000 | 26.880900000 | 15.923976000 |
| H            | 28.544134000 | 28.545528000 | 28.545099000 | O       | 11.493735000 | 26.880900000 | 16.986310000 |
| H            | 25.215026000 | 25.218505000 | 28.544917000 | O       | 14.472677000 | 27.913127000 | 14.472677000 |
| O            | 14.472677000 | 25.848673000 | 14.472677000 | Zr      | 13.440450000 | 26.880900000 | 10.956924000 |
| O            | 12.408223000 | 25.848673000 | 12.408223000 | O       | 11.493735000 | 26.880900000 | 9.894590000  |
| O            | 14.472677000 | 25.848673000 | 12.408223000 | O       | 15.387165000 | 26.880900000 | 9.894590000  |
| O            | 12.408223000 | 25.848673000 | 14.472677000 | O       | 12.408223000 | 27.913127000 | 12.408223000 |
| Zr           | 13.440450000 | 24.397374000 | 13.440450000 | O       | 15.387165000 | 26.880900000 | 16.986310000 |
| O            | 11.493735000 | 23.335040000 | 13.440450000 | Zr      | 13.440450000 | 29.364426000 | 13.440450000 |
| C            | 10.287052000 | 23.727502000 | 13.440450000 | O       | 11.493735000 | 30.426760000 | 13.440450000 |
| O            | 15.387165000 | 23.335040000 | 13.440450000 | C       | 10.287052000 | 30.034298000 | 13.440450000 |
| C            | 16.593848000 | 23.727502000 | 13.440450000 | O       | 15.387165000 | 30.426760000 | 13.440450000 |
| C            | 17.650268000 | 22.671082000 | 13.440450000 | C       | 16.593848000 | 30.034298000 | 13.440450000 |
| C            | 19.634347000 | 20.687003000 | 13.440450000 | O       | 16.986310000 | 28.827615000 | 13.440450000 |
| C            | 18.960712000 | 22.988008000 | 13.761408000 | O       | 9.894590000  | 28.827615000 | 13.440450000 |
| C            | 19.936757000 | 22.003898000 | 13.776461000 | C       | 22.671082000 | 26.880900000 | 22.671082000 |
| H            | 19.144577000 | 23.999268000 | 13.924306000 | C       | 20.687003000 | 26.880900000 | 20.687003000 |
| H            | 20.830009000 | 22.313835000 | 14.037206000 | C       | 21.360638000 | 27.201858000 | 22.988008000 |
| O            | 9.894590000  | 24.934185000 | 13.440450000 | C       | 20.384593000 | 27.216911000 | 22.003898000 |
| O            | 16.986310000 | 24.934185000 | 13.440450000 | H       | 21.176773000 | 27.364756000 | 23.999268000 |
| C            | 17.333342000 | 21.360638000 | 13.119492000 | H       | 19.491341000 | 27.477656000 | 22.313835000 |
| C            | 18.317452000 | 20.384593000 | 13.104439000 | O       | 13.440450000 | 28.827615000 | 16.986310000 |
| H            | 16.322082000 | 21.176773000 | 12.956594000 | C       | 13.440450000 | 30.034298000 | 16.593848000 |
| H            | 18.007515000 | 19.491341000 | 12.843694000 | O       | 13.440450000 | 28.827615000 | 9.894590000  |
| C            | 22.988008000 | 26.559942000 | 21.360638000 | C       | 13.440450000 | 30.034298000 | 10.287052000 |
| C            | 22.003898000 | 26.544889000 | 20.384593000 | O       | 13.440450000 | 30.426760000 | 15.387165000 |
| H            | 23.999268000 | 26.397044000 | 21.176773000 | O       | 13.440450000 | 30.426760000 | 11.493735000 |
| H            | 22.313835000 | 26.284144000 | 19.491341000 | C       | 17.333342000 | 27.201858000 | 18.960712000 |
| C            | 22.671082000 | 17.650268000 | 13.440450000 | C       | 18.317452000 | 27.216911000 | 19.936757000 |
| C            | 20.687003000 | 19.634347000 | 13.440450000 | H       | 16.322082000 | 27.364756000 | 19.144577000 |
| O            | 13.440450000 | 24.934185000 | 9.894590000  | H       | 18.007515000 | 27.477656000 | 20.830009000 |
| C            | 13.440450000 | 23.727502000 | 10.287052000 | H       | 13.440450000 | 30.790903000 | 9.530447000  |
| O            | 13.440450000 | 24.934185000 | 16.986310000 | H       | 17.350453000 | 26.880900000 | 9.530447000  |
| C            | 13.440450000 | 23.727502000 | 16.593848000 | H       | 17.350453000 | 30.790903000 | 13.440450000 |
| O            | 13.440450000 | 23.335040000 | 15.387165000 | H       | 13.440450000 | 30.790903000 | 17.350453000 |
| O            | 13.440450000 | 23.335040000 | 11.493735000 | H       | 9.530447000  | 30.790903000 | 13.440450000 |
| C            | 18.960712000 | 26.559942000 | 17.333342000 | H       | 9.530447000  | 26.880900000 | 17.350453000 |
| C            | 19.936757000 | 26.544889000 | 18.317452000 | H       | 13.440450000 | 22.970897000 | 9.530447000  |
| H            | 19.144577000 | 26.397044000 | 16.322082000 | H       | 9.530447000  | 22.970897000 | 13.440450000 |
| H            | 20.830009000 | 26.284144000 | 18.007515000 | H       | 13.440450000 | 22.970897000 | 17.350453000 |
| C            | 21.360638000 | 17.333342000 | 13.119492000 | H       | 15.026933000 | 25.294417000 | 11.853967000 |
| C            | 20.384593000 | 18.317452000 | 13.104439000 | H       | 11.853967000 | 28.467383000 | 11.853967000 |
| H            | 21.176773000 | 16.322082000 | 12.956594000 | H       | 9.530447000  | 26.880900000 | 9.530447000  |
| H            | 19.491341000 | 18.007515000 | 12.843694000 | H       | 15.026933000 | 28.467383000 | 15.026933000 |
| C            | 22.988008000 | 18.960712000 | 13.761408000 | H       | 11.853967000 | 25.294417000 | 15.026933000 |
| C            | 22.003898000 | 19.936757000 | 13.776461000 | H       | 26.439405000 | 23.868242000 | 20.930105000 |
| H            | 23.999268000 | 19.144577000 | 13.924306000 | H       | 26.890158000 | 19.384688000 | 16.445695000 |
| H            | 22.313835000 | 20.830009000 | 14.037206000 | H       | 26.993434000 | 19.254371000 | 22.451437000 |
| Zr           | 10.956924000 | 26.880900000 | 13.440450000 | H       | 26.306019000 | 17.871762000 | 21.049969000 |
| O            | 9.894590000  | 26.880900000 | 11.493735000 | H       | 26.998910000 | 21.068383000 | 24.135411000 |
| O            | 12.408223000 | 27.913127000 | 14.472677000 | H       | 26.425304000 | 16.173623000 | 19.251183000 |
| C            | 10.287052000 | 26.880900000 | 10.287052000 | Cu      | 26.577718000 | 21.912421000 | 17.840948000 |
| Zr           | 15.923976000 | 26.880900000 | 13.440450000 | Cl      | 24.608597000 | 21.469714000 | 16.814724000 |
| O            | 16.986310000 | 26.880900000 | 11.493735000 | C       | 27.225417000 | 23.761895000 | 17.367753000 |
| C            | 16.593848000 | 26.880900000 | 10.287052000 | C       | 28.160306000 | 23.091360000 | 17.860382000 |
| O            | 16.986310000 | 26.880900000 | 15.387165000 | H       | 29.143367000 | 22.883862000 | 18.237458000 |
| O            | 14.472677000 | 27.913127000 | 12.408223000 | C       | 26.414190000 | 24.798146000 | 16.668236000 |
| C            | 16.593848000 | 26.880900000 | 16.593848000 | H       | 26.899742000 | 25.758569000 | 16.934510000 |
| C            | 17.650268000 | 26.880900000 | 17.650268000 | H       | 25.407170000 | 24.813115000 | 17.123911000 |
| C            | 19.634347000 | 26.880900000 | 19.634347000 | O       | 26.368080000 | 24.624315000 | 15.310906000 |
| O            | 9.894590000  | 26.880900000 | 15.387165000 | H       | 26.401342000 | 23.237970000 | 14.762386000 |

## ARTICLE

## Journal Name

|               |              |              |              |    |              |              |              |
|---------------|--------------|--------------|--------------|----|--------------|--------------|--------------|
| C             | 25.373558000 | 23.625189000 | 10.895970000 | O  | 27.912892000 | 25.848913000 | 27.912887000 |
| C             | 24.574566000 | 24.263486000 | 12.030916000 | O  | 26.880944000 | 23.334850000 | 28.827576000 |
| C             | 24.384510000 | 23.369146000 | 13.279575000 | O  | 28.827591000 | 23.334868000 | 26.880917000 |
| C             | 24.758621000 | 22.366693000 | 10.285607000 | O  | 25.849012000 | 12.408579000 | 14.472325000 |
| C             | 25.377636000 | 22.252934000 | 13.317232000 | O  | 25.848911000 | 14.472433000 | 14.472432000 |
| C             | 24.300914000 | 21.356120000 | 11.339866000 | O  | 24.934197000 | 13.440504000 | 16.986469000 |
| N             | 25.239334000 | 21.226066000 | 12.450587000 | O  | 26.880944000 | 11.493774000 | 16.986500000 |
| H             | 25.530363000 | 24.365488000 | 10.104904000 | O  | 27.912892000 | 12.408463000 | 14.472437000 |
| H             | 25.487215000 | 21.900665000 | 9.610536000  | O  | 27.912782000 | 14.472319000 | 14.472318000 |
| C             | 27.416722000 | 21.342741000 | 14.268061000 | O  | 28.827591000 | 13.440433000 | 16.986482000 |
| N             | 26.372062000 | 22.336376000 | 14.155128000 | O  | 25.849015000 | 14.472322000 | 12.408582000 |
| C             | 26.950494000 | 20.015285000 | 13.700256000 | O  | 24.934203000 | 16.986468000 | 13.440501000 |
| C             | 26.296530000 | 20.224447000 | 12.347179000 | O  | 27.912889000 | 14.472431000 | 12.408464000 |
| H             | 25.849447000 | 19.295513000 | 11.984004000 | O  | 26.880945000 | 16.986494000 | 11.493769000 |
| H             | 27.670330000 | 21.256138000 | 15.333916000 | O  | 28.827591000 | 16.986480000 | 13.440428000 |
| H             | 26.378618000 | 23.395039000 | 11.275091000 | C  | 23.755332000 | 26.686089000 | 23.755213000 |
| H             | 23.889891000 | 22.623290000 | 9.666451000  | Zr | 24.236612000 | 26.881475000 | 26.880552000 |
| H             | 27.042589000 | 20.543576000 | 11.600404000 | Zr | 26.880671000 | 29.524609000 | 26.880680000 |
| H             | 28.315221000 | 21.714397000 | 13.754945000 | Zr | 29.524440000 | 26.882357000 | 26.881381000 |
| H             | 23.592301000 | 24.589059000 | 11.667657000 | C  | 27.064326000 | 30.008530000 | 23.753165000 |
| H             | 25.111174000 | 25.162119000 | 12.347648000 | C  | 30.008123000 | 27.066993000 | 23.753823000 |
| H             | 27.783703000 | 19.312303000 | 13.606480000 | C  | 23.755714000 | 23.756676000 | 26.684338000 |
| H             | 26.221837000 | 19.570289000 | 14.386664000 | Zr | 26.880615000 | 26.881402000 | 29.524137000 |
| H             | 24.523581000 | 23.956284000 | 14.190100000 | C  | 27.065914000 | 23.754135000 | 30.008060000 |
| H             | 23.379546000 | 22.939185000 | 13.317215000 | C  | 30.007964000 | 23.754748000 | 27.067567000 |
| H             | 23.326561000 | 21.648797000 | 11.741439000 | Zr | 24.236612000 | 13.440798000 | 13.439875000 |
| H             | 24.169525000 | 20.357839000 | 10.911198000 | Zr | 26.880615000 | 10.797213000 | 13.439948000 |
| C             | 27.979900000 | 25.364015000 | 14.330712000 | C  | 23.755714000 | 13.637012000 | 16.564674000 |
| O             | 28.547077000 | 26.004294000 | 15.154346000 | C  | 27.065914000 | 10.313290000 | 16.567215000 |
| O             | 27.804889000 | 24.893120000 | 13.250344000 | Zr | 29.524440000 | 13.439969000 | 13.438993000 |
| <b>f. IM1</b> |              |              |              | C  | 30.007964000 | 13.253783000 | 16.566602000 |
| N             | 26.666747000 | 21.878604000 | 20.384984000 | Zr | 26.880671000 | 13.440670000 | 10.796741000 |
| N             | 26.885593000 | 19.909896000 | 18.460041000 | C  | 23.755332000 | 16.566137000 | 13.635261000 |
| C             | 26.659874000 | 20.592084000 | 20.790654000 | C  | 27.064326000 | 16.568185000 | 10.312820000 |
| C             | 26.701220000 | 22.852978000 | 21.303438000 | C  | 30.008123000 | 16.567527000 | 13.254357000 |
| C             | 26.868074000 | 18.991635000 | 17.478751000 | O  | 23.334855000 | 26.880866000 | 24.934215000 |
| C             | 26.644556000 | 19.534056000 | 19.736322000 | O  | 23.334856000 | 24.934212000 | 26.880862000 |
| C             | 26.681306000 | 20.274176000 | 22.157466000 | O  | 25.848909000 | 27.912895000 | 27.912897000 |
| C             | 26.717004000 | 22.631861000 | 22.692714000 | O  | 23.334862000 | 26.880939000 | 28.827594000 |
| C             | 26.691635000 | 17.620606000 | 17.690519000 | O  | 23.334864000 | 28.827596000 | 26.880937000 |
| C             | 26.398237000 | 18.181935000 | 20.023442000 | O  | 24.934210000 | 30.426941000 | 26.880925000 |
| C             | 26.704811000 | 21.292138000 | 23.101196000 | O  | 26.880889000 | 30.426939000 | 24.934203000 |
| C             | 26.450082000 | 17.229080000 | 19.015125000 | O  | 26.880879000 | 30.426942000 | 28.827590000 |
| C             | 26.809925000 | 23.730886000 | 23.728973000 | O  | 27.912786000 | 27.912776000 | 27.912777000 |
| C             | 26.809925000 | 16.592377000 | 16.590464000 | O  | 28.827596000 | 30.426944000 | 26.880863000 |
| O             | 26.880885000 | 24.934153000 | 23.334955000 | O  | 30.426933000 | 24.934198000 | 26.880924000 |
| O             | 26.880903000 | 23.334945000 | 24.934136000 | O  | 30.426936000 | 26.880929000 | 24.934199000 |
| O             | 26.880903000 | 15.387214000 | 16.986405000 | O  | 30.426944000 | 26.880866000 | 28.827595000 |
| O             | 26.880885000 | 16.986395000 | 15.387197000 | O  | 30.426946000 | 28.827594000 | 26.880867000 |
| Zr            | 26.878142000 | 26.881612000 | 24.237883000 | O  | 24.934211000 | 26.880924000 | 30.426942000 |
| Zr            | 26.878209000 | 24.239690000 | 26.880717000 | O  | 26.880889000 | 24.934201000 | 30.426937000 |
| Zr            | 26.878209000 | 13.440633000 | 16.081660000 | O  | 26.880878000 | 28.827589000 | 30.426943000 |
| Zr            | 26.878142000 | 16.083467000 | 13.439738000 | O  | 28.827598000 | 26.880862000 | 30.426940000 |
| O             | 24.934203000 | 26.880849000 | 23.334882000 | O  | 25.848909000 | 12.408453000 | 12.408455000 |
| O             | 25.848911000 | 25.848918000 | 25.848917000 | O  | 23.334862000 | 11.493756000 | 13.440411000 |
| O             | 25.849015000 | 27.912768000 | 25.849028000 | O  | 23.334855000 | 15.387135000 | 13.440484000 |
| O             | 27.912782000 | 25.849032000 | 25.849031000 | O  | 23.334864000 | 13.440413000 | 11.493754000 |
| O             | 27.912889000 | 27.912886000 | 25.848919000 | O  | 23.334856000 | 13.440488000 | 15.387138000 |
| O             | 26.880945000 | 28.827581000 | 23.334856000 | O  | 24.934211000 | 9.894408000  | 13.440426000 |
| O             | 28.827591000 | 26.880922000 | 23.334870000 | O  | 26.880889000 | 9.894413000  | 15.387149000 |
| O             | 24.934197000 | 23.334881000 | 26.880846000 | O  | 27.912786000 | 12.408573000 | 12.408574000 |
| O             | 25.849012000 | 25.849025000 | 27.912771000 | O  | 26.880878000 | 9.894407000  | 11.493761000 |



|    |              |              |              |    |              |              |              |
|----|--------------|--------------|--------------|----|--------------|--------------|--------------|
| O  | 28.827598000 | 9.894410000  | 13.440488000 | O  | 9.894590000  | 24.934185000 | 13.440450000 |
| O  | 30.426944000 | 11.493755000 | 13.440484000 | O  | 16.986310000 | 24.934185000 | 13.440450000 |
| O  | 30.426936000 | 15.387151000 | 13.440421000 | C  | 17.333342000 | 21.360638000 | 13.119492000 |
| O  | 30.426946000 | 13.440483000 | 11.493756000 | C  | 18.317452000 | 20.384593000 | 13.104439000 |
| O  | 30.426933000 | 13.440426000 | 15.387152000 | H  | 16.322082000 | 21.176773000 | 12.956594000 |
| O  | 24.934210000 | 13.440425000 | 9.894409000  | H  | 18.007515000 | 19.491341000 | 12.843694000 |
| O  | 26.880879000 | 11.493760000 | 9.894408000  | C  | 22.988008000 | 26.559942000 | 21.360638000 |
| O  | 26.880889000 | 15.387147000 | 9.894411000  | C  | 22.003898000 | 26.544889000 | 20.384593000 |
| O  | 28.827596000 | 13.440487000 | 9.894406000  | H  | 23.999268000 | 26.397044000 | 21.176773000 |
| C  | 23.753697000 | 27.066116000 | 30.007949000 | H  | 22.313835000 | 26.284144000 | 19.491341000 |
| C  | 23.753135000 | 30.008630000 | 27.063604000 | C  | 22.671082000 | 17.650268000 | 13.440450000 |
| C  | 26.696398000 | 30.008246000 | 30.008106000 | C  | 20.687003000 | 19.634347000 | 13.440450000 |
| C  | 30.007968000 | 30.008237000 | 26.695581000 | O  | 13.440450000 | 24.934185000 | 9.894590000  |
| C  | 30.008286000 | 26.697416000 | 30.008420000 | C  | 13.440450000 | 23.727502000 | 10.287052000 |
| C  | 23.753697000 | 10.313401000 | 13.255234000 | O  | 13.440450000 | 24.934185000 | 16.986310000 |
| C  | 23.753135000 | 13.257746000 | 10.312720000 | C  | 13.440450000 | 23.727502000 | 16.593848000 |
| C  | 26.696398000 | 10.313244000 | 10.313104000 | O  | 13.440450000 | 23.335040000 | 15.387165000 |
| C  | 30.008286000 | 10.312930000 | 13.623934000 | O  | 13.440450000 | 23.335040000 | 11.493735000 |
| C  | 30.007968000 | 13.625768000 | 10.313113000 | C  | 18.960712000 | 26.559942000 | 17.333342000 |
| H  | 27.351814000 | 30.759513000 | 23.002127000 | C  | 19.936757000 | 26.544889000 | 18.317452000 |
| H  | 30.758179000 | 27.358190000 | 23.003211000 | H  | 19.144577000 | 26.397044000 | 16.322082000 |
| H  | 23.008991000 | 23.009158000 | 26.377462000 | H  | 20.830009000 | 26.284144000 | 18.007515000 |
| H  | 27.355985000 | 23.003402000 | 30.758391000 | C  | 21.360638000 | 17.333342000 | 13.119492000 |
| H  | 30.757581000 | 23.004153000 | 27.359935000 | C  | 20.384593000 | 18.317452000 | 13.104439000 |
| H  | 23.008991000 | 13.943888000 | 17.312192000 | H  | 21.176773000 | 16.322082000 | 12.956594000 |
| H  | 27.355985000 | 9.562959000  | 17.317948000 | H  | 19.491341000 | 18.007515000 | 12.843694000 |
| H  | 30.757582000 | 12.961415000 | 17.317197000 | C  | 22.988008000 | 18.960712000 | 13.761408000 |
| H  | 27.351814000 | 17.319223000 | 9.561837000  | C  | 22.003898000 | 19.936757000 | 13.776461000 |
| H  | 30.758179000 | 17.318139000 | 12.963160000 | H  | 23.999268000 | 19.144577000 | 13.924306000 |
| H  | 23.003255000 | 27.356162000 | 30.758555000 | H  | 22.313835000 | 20.830009000 | 14.037206000 |
| H  | 23.001913000 | 30.759916000 | 27.349810000 | Zr | 10.956924000 | 26.880900000 | 13.440450000 |
| H  | 26.407446000 | 30.758917000 | 30.758911000 | O  | 9.894590000  | 26.880900000 | 11.493735000 |
| H  | 30.758582000 | 30.758568000 | 26.405278000 | O  | 12.408223000 | 27.913127000 | 14.472677000 |
| H  | 30.759373000 | 26.409850000 | 30.759355000 | C  | 10.287052000 | 26.880900000 | 10.287052000 |
| H  | 23.003255000 | 9.562795000  | 12.965188000 | Zr | 15.923976000 | 26.880900000 | 13.440450000 |
| H  | 23.001913000 | 12.971540000 | 9.561434000  | O  | 16.986310000 | 26.880900000 | 11.493735000 |
| H  | 26.407446000 | 9.562439000  | 9.562434000  | C  | 16.593848000 | 26.880900000 | 10.287052000 |
| H  | 30.759373000 | 9.561995000  | 13.911500000 | O  | 16.986310000 | 26.880900000 | 15.387165000 |
| H  | 30.758582000 | 13.916071000 | 9.562782000  | O  | 14.472677000 | 27.913127000 | 12.408223000 |
| H  | 25.215026000 | 11.776433000 | 15.102845000 | C  | 16.593848000 | 26.880900000 | 16.593848000 |
| H  | 28.544134000 | 11.776251000 | 11.775822000 | C  | 17.650268000 | 26.880900000 | 17.650268000 |
| H  | 28.555271000 | 15.099035000 | 15.098322000 | C  | 19.634347000 | 26.880900000 | 19.634347000 |
| H  | 25.215244000 | 15.103495000 | 11.776660000 | O  | 9.894590000  | 26.880900000 | 15.387165000 |
| H  | 25.215244000 | 28.544690000 | 25.217855000 | C  | 10.287052000 | 26.880900000 | 16.593848000 |
| H  | 28.555271000 | 25.223028000 | 25.222315000 | Zr | 13.440450000 | 26.880900000 | 15.923976000 |
| H  | 28.544134000 | 28.545528000 | 28.545099000 | O  | 11.493735000 | 26.880900000 | 16.986310000 |
| H  | 25.215026000 | 25.218505000 | 28.544917000 | O  | 14.472677000 | 27.913127000 | 14.472677000 |
| O  | 14.472677000 | 25.848673000 | 14.472677000 | Zr | 13.440450000 | 26.880900000 | 10.956924000 |
| O  | 12.408223000 | 25.848673000 | 12.408223000 | O  | 11.493735000 | 26.880900000 | 9.894590000  |
| O  | 14.472677000 | 25.848673000 | 12.408223000 | O  | 15.387165000 | 26.880900000 | 9.894590000  |
| O  | 12.408223000 | 25.848673000 | 14.472677000 | O  | 12.408223000 | 27.913127000 | 12.408223000 |
| Zr | 13.440450000 | 24.397374000 | 13.440450000 | O  | 15.387165000 | 26.880900000 | 16.986310000 |
| O  | 11.493735000 | 23.335040000 | 13.440450000 | Zr | 13.440450000 | 29.364426000 | 13.440450000 |
| C  | 10.287052000 | 23.727502000 | 13.440450000 | O  | 11.493735000 | 30.426760000 | 13.440450000 |
| O  | 15.387165000 | 23.335040000 | 13.440450000 | C  | 10.287052000 | 30.034298000 | 13.440450000 |
| C  | 16.593848000 | 23.727502000 | 13.440450000 | O  | 15.387165000 | 30.426760000 | 13.440450000 |
| C  | 17.650268000 | 22.671082000 | 13.440450000 | C  | 16.593848000 | 30.034298000 | 13.440450000 |
| C  | 19.634347000 | 20.687003000 | 13.440450000 | O  | 16.986310000 | 28.827615000 | 13.440450000 |
| C  | 18.960712000 | 22.988008000 | 13.761408000 | O  | 9.894590000  | 28.827615000 | 13.440450000 |
| C  | 19.936757000 | 22.003898000 | 13.776461000 | C  | 22.671082000 | 26.880900000 | 22.671082000 |
| H  | 19.144577000 | 23.999268000 | 13.924306000 | C  | 20.687003000 | 26.880900000 | 20.687003000 |
| H  | 20.830009000 | 22.313835000 | 14.037206000 | C  | 21.360638000 | 27.201858000 | 22.988008000 |

## ARTICLE

## Journal Name

|    |              |              |              |               |              |              |              |
|----|--------------|--------------|--------------|---------------|--------------|--------------|--------------|
| C  | 20.384593000 | 27.216911000 | 22.003898000 | H             | 25.824787000 | 24.649039000 | 11.331944000 |
| H  | 21.176773000 | 27.364756000 | 23.99268000  | H             | 27.272898000 | 24.265961000 | 10.431285000 |
| H  | 19.491341000 | 27.477656000 | 22.313835000 | H             | 28.589668000 | 19.217242000 | 14.835203000 |
| O  | 13.440450000 | 28.827615000 | 16.986310000 | H             | 28.304243000 | 20.893112000 | 15.382404000 |
| C  | 13.440450000 | 30.034298000 | 16.593848000 | H             | 28.356823000 | 24.334795000 | 12.472673000 |
| O  | 13.440450000 | 28.827615000 | 9.894590000  | H             | 26.867013000 | 24.251119000 | 13.367607000 |
| C  | 13.440450000 | 30.034298000 | 10.287052000 | H             | 25.250446000 | 23.014506000 | 13.536353000 |
| O  | 13.440450000 | 30.426760000 | 15.387165000 | H             | 24.728875000 | 21.379097000 | 13.737458000 |
| O  | 13.440450000 | 30.426760000 | 11.493735000 | C             | 30.256370000 | 24.354927000 | 14.847397000 |
| C  | 17.333342000 | 27.201858000 | 18.960712000 | O             | 30.817891000 | 25.044065000 | 15.685093000 |
| C  | 18.317452000 | 27.216911000 | 19.936757000 | O             | 30.602876000 | 23.939788000 | 13.711018000 |
| H  | 16.322082000 | 27.364756000 | 19.144577000 | <b>g. TS2</b> |              |              |              |
| H  | 18.007515000 | 27.477656000 | 20.830009000 | N             | 26.389759000 | 21.812509000 | 20.426083000 |
| H  | 13.440450000 | 30.790903000 | 9.530447000  | N             | 26.662346000 | 19.910226000 | 18.484964000 |
| H  | 17.350453000 | 26.880900000 | 9.530447000  | C             | 26.700849000 | 20.544621000 | 20.816551000 |
| H  | 17.350453000 | 30.790903000 | 13.440450000 | C             | 26.444651000 | 22.808392000 | 21.334175000 |
| H  | 13.440450000 | 30.790903000 | 17.350453000 | C             | 26.640720000 | 18.994342000 | 17.497505000 |
| H  | 9.530447000  | 30.790903000 | 13.440450000 | C             | 26.679136000 | 19.492863000 | 19.778052000 |
| H  | 9.530447000  | 26.880900000 | 17.350453000 | C             | 27.029244000 | 20.281437000 | 22.155371000 |
| H  | 13.440450000 | 22.970897000 | 9.530447000  | C             | 26.735788000 | 22.623360000 | 22.695079000 |
| H  | 9.530447000  | 22.970897000 | 13.440450000 | C             | 26.705812000 | 17.611863000 | 17.701473000 |
| H  | 13.440450000 | 22.970897000 | 17.350453000 | C             | 26.667445000 | 18.118295000 | 20.070369000 |
| H  | 15.026933000 | 25.294417000 | 11.853967000 | C             | 27.020076000 | 21.303271000 | 23.090357000 |
| H  | 11.853967000 | 28.467383000 | 11.853967000 | C             | 26.701375000 | 17.187334000 | 19.045588000 |
| H  | 9.530447000  | 26.880900000 | 9.530447000  | C             | 26.809925000 | 23.730886000 | 23.728973000 |
| H  | 15.026933000 | 28.467383000 | 15.026933000 | C             | 26.809925000 | 16.592377000 | 16.590464000 |
| H  | 11.853967000 | 25.294417000 | 15.026933000 | O             | 26.880885000 | 24.934153000 | 23.334955000 |
| H  | 26.722677000 | 23.870140000 | 20.915575000 | O             | 26.880903000 | 23.334945000 | 24.934136000 |
| H  | 27.016250000 | 19.384078000 | 16.476612000 | O             | 26.880903000 | 15.387214000 | 16.986405000 |
| H  | 26.705026000 | 19.241095000 | 22.489703000 | O             | 26.880885000 | 16.986395000 | 15.387197000 |
| H  | 26.164298000 | 17.871030000 | 21.036165000 | Zr            | 26.878142000 | 26.881612000 | 24.237883000 |
| H  | 26.732924000 | 21.065396000 | 24.162313000 | Zr            | 26.878209000 | 24.239690000 | 26.880717000 |
| H  | 26.297679000 | 16.177343000 | 19.237104000 | Zr            | 26.878209000 | 13.440633000 | 16.081660000 |
| Cu | 27.286120000 | 21.857227000 | 17.875704000 | Zr            | 26.878142000 | 16.083467000 | 13.439738000 |
| Cl | 25.578255000 | 22.050470000 | 16.409868000 | O             | 24.934203000 | 26.880849000 | 23.334882000 |
| C  | 28.595497000 | 23.309038000 | 17.436778000 | O             | 25.848911000 | 25.848918000 | 25.848917000 |
| C  | 29.084080000 | 22.542144000 | 18.294630000 | O             | 25.849015000 | 27.912768000 | 25.849028000 |
| H  | 29.806955000 | 22.172172000 | 18.996448000 | O             | 27.912782000 | 25.849032000 | 25.849031000 |
| C  | 28.387417000 | 24.324977000 | 16.388222000 | O             | 27.912889000 | 27.912886000 | 25.848919000 |
| H  | 28.908235000 | 25.240144000 | 16.702418000 | O             | 26.880945000 | 28.827581000 | 23.334856000 |
| H  | 27.315866000 | 24.517291000 | 16.264461000 | O             | 28.827591000 | 26.880922000 | 23.334870000 |
| O  | 28.899357000 | 23.894004000 | 15.149344000 | O             | 24.934197000 | 23.334881000 | 26.880846000 |
| H  | 29.686490000 | 22.829301000 | 13.135971000 | O             | 25.849012000 | 25.849025000 | 27.912771000 |
| C  | 25.983501000 | 22.585020000 | 10.720258000 | O             | 27.912892000 | 25.848913000 | 27.912887000 |
| C  | 26.607542000 | 23.890345000 | 11.214609000 | O             | 26.880944000 | 23.334850000 | 28.827576000 |
| C  | 27.411044000 | 23.792048000 | 12.535640000 | O             | 28.827591000 | 23.334868000 | 26.880917000 |
| C  | 24.918292000 | 21.997390000 | 11.644188000 | O             | 25.849012000 | 12.408579000 | 14.472325000 |
| C  | 27.732408000 | 22.393245000 | 12.958007000 | O             | 25.848911000 | 14.472433000 | 14.472432000 |
| C  | 25.348504000 | 22.013660000 | 13.106124000 | O             | 24.934197000 | 13.440504000 | 16.986469000 |
| N  | 26.731439000 | 21.569840000 | 13.275728000 | O             | 26.880944000 | 11.493774000 | 16.986500000 |
| H  | 25.555623000 | 22.744548000 | 9.724958000  | O             | 27.912892000 | 12.408463000 | 14.472437000 |
| H  | 24.687646000 | 20.971545000 | 11.330109000 | O             | 27.912782000 | 14.472319000 | 14.472318000 |
| C  | 29.406309000 | 20.746975000 | 13.549505000 | O             | 28.827591000 | 13.440433000 | 16.986482000 |
| N  | 28.998811000 | 22.021400000 | 12.977007000 | O             | 25.849015000 | 14.472322000 | 12.408582000 |
| C  | 28.350753000 | 20.231461000 | 14.504947000 | O             | 24.934203000 | 16.986468000 | 13.440501000 |
| C  | 26.996451000 | 20.240736000 | 13.826269000 | O             | 27.912889000 | 14.472431000 | 12.408464000 |
| H  | 26.200274000 | 20.037343000 | 14.549616000 | O             | 26.880945000 | 16.986494000 | 11.493769000 |
| H  | 30.361221000 | 20.917952000 | 14.055214000 | O             | 28.827591000 | 16.986480000 | 13.440428000 |
| H  | 26.782916000 | 21.844364000 | 10.580382000 | C             | 23.755332000 | 26.686089000 | 23.755213000 |
| H  | 23.983079000 | 22.564485000 | 11.561528000 | Zr            | 24.236612000 | 26.881475000 | 26.880552000 |
| H  | 26.939223000 | 19.486672000 | 13.025638000 | Zr            | 26.880671000 | 29.524609000 | 26.880680000 |
| H  | 29.583329000 | 20.021766000 | 12.742703000 | Zr            | 29.524440000 | 26.882357000 | 26.881381000 |

| Journal Name |              |              |              | ARTICLE |              |              |              |
|--------------|--------------|--------------|--------------|---------|--------------|--------------|--------------|
| C            | 27.064326000 | 30.008530000 | 23.753165000 | H       | 27.351814000 | 30.759513000 | 23.002127000 |
| C            | 30.008123000 | 27.066993000 | 23.753823000 | H       | 30.758179000 | 27.358190000 | 23.003211000 |
| C            | 23.755714000 | 23.756676000 | 26.684338000 | H       | 23.008991000 | 23.009158000 | 26.377462000 |
| Zr           | 26.880615000 | 26.881402000 | 29.524137000 | H       | 27.355985000 | 23.003402000 | 30.758391000 |
| C            | 27.065914000 | 23.754135000 | 30.008060000 | H       | 30.757581000 | 23.004153000 | 27.359935000 |
| C            | 30.007964000 | 23.754748000 | 27.067567000 | H       | 23.008991000 | 13.943888000 | 17.312192000 |
| Zr           | 24.236612000 | 13.440798000 | 13.439875000 | H       | 27.355985000 | 9.562959000  | 17.317948000 |
| Zr           | 26.880615000 | 10.797213000 | 13.439948000 | H       | 30.757582000 | 12.961415000 | 17.317197000 |
| C            | 23.755714000 | 13.637012000 | 16.564674000 | H       | 27.351814000 | 17.319223000 | 9.561837000  |
| C            | 27.065914000 | 10.313290000 | 16.567215000 | H       | 30.758179000 | 17.318139000 | 12.963160000 |
| Zr           | 29.524440000 | 13.439969000 | 13.438993000 | H       | 23.003255000 | 27.356162000 | 30.758555000 |
| C            | 30.007964000 | 13.253783000 | 16.566602000 | H       | 23.001913000 | 30.759916000 | 27.349810000 |
| Zr           | 26.880671000 | 13.440670000 | 10.796741000 | H       | 26.407446000 | 30.758917000 | 30.758911000 |
| C            | 23.755332000 | 16.566137000 | 13.635261000 | H       | 30.758582000 | 30.758568000 | 26.405278000 |
| C            | 27.064326000 | 16.568185000 | 10.312820000 | H       | 30.759373000 | 26.409850000 | 30.759355000 |
| C            | 30.008123000 | 16.567527000 | 13.254357000 | H       | 23.003255000 | 9.562795000  | 12.965188000 |
| O            | 23.334855000 | 26.880866000 | 24.934215000 | H       | 23.001913000 | 12.971540000 | 9.561434000  |
| O            | 23.334856000 | 24.934212000 | 26.880862000 | H       | 26.407446000 | 9.562439000  | 9.562434000  |
| O            | 25.848909000 | 27.912895000 | 27.912897000 | H       | 30.759373000 | 9.561995000  | 13.911500000 |
| O            | 23.334862000 | 26.880939000 | 28.827594000 | H       | 30.758582000 | 13.916071000 | 9.562782000  |
| O            | 23.334864000 | 28.827596000 | 26.880937000 | H       | 25.215026000 | 11.776433000 | 15.102845000 |
| O            | 24.934210000 | 30.426941000 | 26.880925000 | H       | 28.544134000 | 11.776251000 | 11.775822000 |
| O            | 26.880889000 | 30.426939000 | 24.934203000 | H       | 28.555271000 | 15.099035000 | 15.098322000 |
| O            | 26.880879000 | 30.426942000 | 28.827590000 | H       | 25.215244000 | 15.103495000 | 11.776660000 |
| O            | 27.912786000 | 27.912776000 | 27.912777000 | H       | 25.215244000 | 28.544690000 | 25.217855000 |
| O            | 28.827596000 | 30.426944000 | 26.880863000 | H       | 28.555271000 | 25.223028000 | 25.222315000 |
| O            | 30.426933000 | 24.934198000 | 26.880924000 | H       | 28.544134000 | 28.545528000 | 28.545099000 |
| O            | 30.426936000 | 26.880929000 | 24.934199000 | H       | 25.215026000 | 25.218505000 | 28.544917000 |
| O            | 30.426944000 | 26.880866000 | 28.827595000 | O       | 14.472677000 | 25.848673000 | 14.472677000 |
| O            | 30.426946000 | 28.827594000 | 26.880867000 | O       | 12.408223000 | 25.848673000 | 12.408223000 |
| O            | 24.934211000 | 26.880924000 | 30.426942000 | O       | 14.472677000 | 25.848673000 | 12.408223000 |
| O            | 26.880889000 | 24.934201000 | 30.426937000 | O       | 12.408223000 | 25.848673000 | 14.472677000 |
| O            | 26.880878000 | 28.827589000 | 30.426943000 | Zr      | 13.440450000 | 24.397374000 | 13.440450000 |
| O            | 28.827598000 | 26.880862000 | 30.426940000 | O       | 11.493735000 | 23.335040000 | 13.440450000 |
| O            | 25.848909000 | 12.408453000 | 12.408455000 | C       | 10.287052000 | 23.727502000 | 13.440450000 |
| O            | 23.334862000 | 11.493756000 | 13.440411000 | O       | 15.387165000 | 23.335040000 | 13.440450000 |
| O            | 23.334855000 | 15.387135000 | 13.440484000 | C       | 16.593848000 | 23.727502000 | 13.440450000 |
| O            | 23.334864000 | 13.440413000 | 11.493754000 | C       | 17.650268000 | 22.671082000 | 13.440450000 |
| O            | 23.334856000 | 13.440488000 | 15.387138000 | C       | 19.634347000 | 20.687003000 | 13.440450000 |
| O            | 24.934211000 | 9.894408000  | 13.440426000 | C       | 18.960712000 | 22.988008000 | 13.761408000 |
| O            | 26.880889000 | 9.894413000  | 15.387149000 | C       | 19.936757000 | 22.003898000 | 13.776461000 |
| O            | 27.912786000 | 12.408573000 | 12.408574000 | H       | 19.144577000 | 23.999268000 | 13.924306000 |
| O            | 26.880878000 | 9.894407000  | 11.493761000 | H       | 20.830009000 | 22.313835000 | 14.037206000 |
| O            | 28.827598000 | 9.894410000  | 13.440488000 | O       | 9.894590000  | 24.934185000 | 13.440450000 |
| O            | 30.426944000 | 11.493755000 | 13.440484000 | O       | 16.986310000 | 24.934185000 | 13.440450000 |
| O            | 30.426936000 | 15.387151000 | 13.440421000 | C       | 17.333342000 | 21.360638000 | 13.119492000 |
| O            | 30.426946000 | 13.440483000 | 11.493756000 | C       | 18.317452000 | 20.384593000 | 13.104439000 |
| O            | 30.426933000 | 13.440426000 | 15.387152000 | H       | 16.322082000 | 21.176773000 | 12.956594000 |
| O            | 24.934210000 | 13.440425000 | 9.894409000  | H       | 18.007515000 | 19.491341000 | 12.843694000 |
| O            | 26.880879000 | 11.493760000 | 9.894408000  | C       | 22.988008000 | 26.559942000 | 21.360638000 |
| O            | 26.880889000 | 15.387147000 | 9.894411000  | C       | 22.003898000 | 26.544889000 | 20.384593000 |
| O            | 28.827596000 | 13.440487000 | 9.894406000  | H       | 23.999268000 | 26.397044000 | 21.176773000 |
| C            | 23.753697000 | 27.066116000 | 30.007949000 | H       | 22.313835000 | 26.284144000 | 19.491341000 |
| C            | 23.753135000 | 30.008630000 | 27.063604000 | C       | 22.671082000 | 17.650268000 | 13.440450000 |
| C            | 26.696398000 | 30.008246000 | 30.008106000 | C       | 20.687003000 | 19.634347000 | 13.440450000 |
| C            | 30.007968000 | 30.008237000 | 26.695581000 | O       | 13.440450000 | 24.934185000 | 9.894590000  |
| C            | 30.008286000 | 26.697416000 | 30.008420000 | C       | 13.440450000 | 23.727502000 | 10.287052000 |
| C            | 23.753697000 | 10.313401000 | 13.255234000 | O       | 13.440450000 | 24.934185000 | 16.986310000 |
| C            | 23.753135000 | 13.257746000 | 10.312720000 | C       | 13.440450000 | 23.727502000 | 16.593848000 |
| C            | 26.696398000 | 10.313244000 | 10.313104000 | O       | 13.440450000 | 23.335040000 | 15.387165000 |
| C            | 30.008286000 | 10.312930000 | 13.623934000 | O       | 13.440450000 | 23.335040000 | 11.493735000 |
| C            | 30.007968000 | 13.625768000 | 10.313113000 | C       | 18.960712000 | 26.559942000 | 17.333342000 |

## ARTICLE

## Journal Name

|    |              |              |              |               |              |              |              |
|----|--------------|--------------|--------------|---------------|--------------|--------------|--------------|
| C  | 19.936757000 | 26.544889000 | 18.317452000 | H             | 13.440450000 | 22.970897000 | 9.530447000  |
| H  | 19.144577000 | 26.397044000 | 16.322082000 | H             | 9.530447000  | 22.970897000 | 13.440450000 |
| H  | 20.830009000 | 26.284144000 | 18.007515000 | H             | 13.440450000 | 22.970897000 | 17.350453000 |
| C  | 21.360638000 | 17.333342000 | 13.119492000 | H             | 15.026933000 | 25.294417000 | 11.853967000 |
| C  | 20.384593000 | 18.317452000 | 13.104439000 | H             | 11.853967000 | 28.467383000 | 11.853967000 |
| H  | 21.176773000 | 16.322082000 | 12.956594000 | H             | 9.530447000  | 26.880900000 | 9.530447000  |
| H  | 19.491341000 | 18.007515000 | 12.843694000 | H             | 15.026933000 | 28.467383000 | 15.026933000 |
| C  | 22.988008000 | 18.960712000 | 13.761408000 | H             | 11.853967000 | 25.294417000 | 15.026933000 |
| C  | 22.003898000 | 19.936757000 | 13.776461000 | H             | 26.227248000 | 23.803218000 | 20.949955000 |
| H  | 23.999268000 | 19.144577000 | 13.924306000 | H             | 26.565366000 | 19.396364000 | 16.490741000 |
| H  | 22.313835000 | 20.830009000 | 14.037206000 | H             | 27.308989000 | 19.277698000 | 22.460618000 |
| Zr | 10.956924000 | 26.880900000 | 13.440450000 | H             | 26.617707000 | 17.779188000 | 21.100610000 |
| O  | 9.894590000  | 26.880900000 | 11.493735000 | H             | 27.260516000 | 21.106443000 | 24.129982000 |
| O  | 12.408223000 | 27.913127000 | 14.472677000 | H             | 26.715190000 | 16.124469000 | 19.262450000 |
| C  | 10.287052000 | 26.880900000 | 10.287052000 | Cu            | 26.099828000 | 21.930408000 | 18.267951000 |
| Zr | 15.923976000 | 26.880900000 | 13.440450000 | Cl            | 24.227354000 | 21.326287000 | 16.994943000 |
| O  | 16.986310000 | 26.880900000 | 11.493735000 | C             | 26.213462000 | 24.228663000 | 16.846477000 |
| C  | 16.593848000 | 26.880900000 | 10.287052000 | C             | 27.041275000 | 23.526707000 | 17.505668000 |
| O  | 16.986310000 | 26.880900000 | 15.387165000 | H             | 28.122773000 | 23.574154000 | 17.502676000 |
| O  | 14.472677000 | 27.913127000 | 12.408223000 | C             | 24.868439000 | 24.626184000 | 16.450480000 |
| C  | 16.593848000 | 26.880900000 | 16.593848000 | H             | 24.650998000 | 25.648182000 | 16.790164000 |
| C  | 17.650268000 | 26.880900000 | 17.650268000 | H             | 24.142075000 | 23.927016000 | 16.883045000 |
| C  | 19.634347000 | 26.880900000 | 19.634347000 | O             | 24.750877000 | 24.549313000 | 15.035227000 |
| O  | 9.894590000  | 26.880900000 | 15.387165000 | H             | 25.126584000 | 22.749144000 | 14.590517000 |
| C  | 10.287052000 | 26.880900000 | 16.593848000 | C             | 25.728821000 | 23.281044000 | 10.481502000 |
| Zr | 13.440450000 | 26.880900000 | 15.923976000 | C             | 24.352079000 | 23.503804000 | 11.099585000 |
| O  | 11.493735000 | 26.880900000 | 16.986310000 | C             | 24.018084000 | 22.598896000 | 12.315251000 |
| O  | 14.472677000 | 27.913127000 | 14.472677000 | C             | 25.900302000 | 21.929081000 | 9.792785000  |
| Zr | 13.440450000 | 26.880900000 | 10.956924000 | C             | 25.183302000 | 21.811962000 | 12.826388000 |
| O  | 11.493735000 | 26.880900000 | 9.894590000  | C             | 25.357385000 | 20.782847000 | 10.642045000 |
| O  | 15.387165000 | 26.880900000 | 9.894590000  | N             | 25.761467000 | 20.889686000 | 12.041743000 |
| O  | 12.408223000 | 27.913127000 | 12.408223000 | H             | 25.932151000 | 24.080902000 | 9.763252000  |
| O  | 15.387165000 | 26.880900000 | 16.986310000 | H             | 26.959123000 | 21.758583000 | 9.562231000  |
| Zr | 13.440450000 | 29.364426000 | 13.440450000 | C             | 26.820984000 | 21.448475000 | 14.609570000 |
| O  | 11.493735000 | 30.426760000 | 13.440450000 | N             | 25.621909000 | 22.039749000 | 14.042194000 |
| C  | 10.287052000 | 30.034298000 | 13.440450000 | C             | 27.079938000 | 20.109030000 | 13.954152000 |
| O  | 15.387165000 | 30.426760000 | 13.440450000 | C             | 27.010495000 | 20.238375000 | 12.445517000 |
| C  | 16.593848000 | 30.034298000 | 13.440450000 | H             | 27.038984000 | 19.255224000 | 11.966709000 |
| O  | 16.986310000 | 28.827615000 | 13.440450000 | H             | 26.652022000 | 21.365299000 | 15.688681000 |
| O  | 9.894590000  | 28.827615000 | 13.440450000 | H             | 26.478613000 | 23.411483000 | 11.272215000 |
| C  | 22.671082000 | 26.880900000 | 22.671082000 | H             | 25.369977000 | 21.913689000 | 8.832460000  |
| C  | 20.687003000 | 26.880900000 | 20.687003000 | H             | 27.859441000 | 20.825808000 | 12.063514000 |
| C  | 21.360638000 | 27.201858000 | 22.988008000 | H             | 27.654789000 | 22.148471000 | 14.460100000 |
| C  | 20.384593000 | 27.216911000 | 22.003898000 | H             | 23.572936000 | 23.374560000 | 10.337693000 |
| H  | 21.176773000 | 27.364756000 | 23.999268000 | H             | 24.313078000 | 24.535851000 | 11.449011000 |
| H  | 19.491341000 | 27.477656000 | 22.313835000 | H             | 28.057627000 | 19.717183000 | 14.245736000 |
| O  | 13.440450000 | 28.827615000 | 16.986310000 | H             | 26.333211000 | 19.382450000 | 14.292693000 |
| C  | 13.440450000 | 30.034298000 | 16.593848000 | H             | 23.649318000 | 23.209282000 | 13.142631000 |
| O  | 13.440450000 | 28.827615000 | 9.894590000  | H             | 23.222814000 | 21.892074000 | 12.055072000 |
| C  | 13.440450000 | 30.034298000 | 10.287052000 | H             | 24.263421000 | 20.762836000 | 10.601802000 |
| O  | 13.440450000 | 30.426760000 | 15.387165000 | H             | 25.697267000 | 19.805447000 | 10.285991000 |
| O  | 13.440450000 | 30.426760000 | 11.493735000 | C             | 25.966488000 | 25.011963000 | 14.402885000 |
| C  | 17.333342000 | 27.201858000 | 18.960712000 | O             | 26.871443000 | 25.312931000 | 15.229455000 |
| C  | 18.317452000 | 27.216911000 | 19.936757000 | O             | 25.936163000 | 24.985897000 | 13.178729000 |
| H  | 16.322082000 | 27.364756000 | 19.144577000 | <b>h. IM2</b> |              |              |              |
| H  | 18.007515000 | 27.477656000 | 20.830009000 | N             | 26.853458000 | 21.845423000 | 20.409941000 |
| H  | 13.440450000 | 30.790903000 | 9.530447000  | N             | 26.618835000 | 19.927368000 | 18.471018000 |
| H  | 17.350453000 | 26.880900000 | 9.530447000  | C             | 26.653712000 | 20.560236000 | 20.811080000 |
| H  | 17.350453000 | 30.790903000 | 13.440450000 | C             | 26.833825000 | 22.839368000 | 21.323831000 |
| H  | 13.440450000 | 30.790903000 | 17.350453000 | C             | 26.676444000 | 19.006013000 | 17.493814000 |
| H  | 9.530447000  | 30.790903000 | 13.440450000 | C             | 26.683120000 | 19.515350000 | 19.766496000 |
| H  | 9.530447000  | 26.880900000 | 17.350453000 | C             | 26.448323000 | 20.280506000 | 22.173393000 |

|    |              |              |              |   |              |              |              |
|----|--------------|--------------|--------------|---|--------------|--------------|--------------|
| C  | 26.699286000 | 22.629930000 | 22.700353000 | O | 23.334862000 | 26.880939000 | 28.827594000 |
| C  | 26.737844000 | 17.619961000 | 17.698212000 | O | 23.334864000 | 28.827596000 | 26.880937000 |
| C  | 26.792430000 | 18.144725000 | 20.062506000 | O | 24.934210000 | 30.426941000 | 26.880925000 |
| C  | 26.497864000 | 21.297880000 | 23.111207000 | O | 26.880889000 | 30.426939000 | 24.934203000 |
| C  | 26.797209000 | 17.206511000 | 19.043735000 | O | 26.880879000 | 30.426942000 | 28.827590000 |
| C  | 26.809925000 | 23.730886000 | 23.728973000 | O | 27.912786000 | 27.912776000 | 27.912777000 |
| C  | 26.809925000 | 16.592377000 | 16.590464000 | O | 28.827596000 | 30.426944000 | 26.880863000 |
| O  | 26.880885000 | 24.934153000 | 23.334955000 | O | 30.426933000 | 24.934198000 | 26.880924000 |
| O  | 26.880903000 | 23.334945000 | 24.934136000 | O | 30.426936000 | 26.880929000 | 24.934199000 |
| O  | 26.880903000 | 15.387214000 | 16.986405000 | O | 30.426944000 | 26.880866000 | 28.827595000 |
| O  | 26.880885000 | 16.986395000 | 15.387197000 | O | 30.426946000 | 28.827594000 | 26.880867000 |
| Zr | 26.878142000 | 26.881612000 | 24.237883000 | O | 24.934211000 | 26.880924000 | 30.426942000 |
| Zr | 26.878209000 | 24.239690000 | 26.880717000 | O | 26.880889000 | 24.934201000 | 30.426937000 |
| Zr | 26.878209000 | 13.440633000 | 16.081660000 | O | 26.880878000 | 28.827589000 | 30.426943000 |
| Zr | 26.878142000 | 16.083467000 | 13.439738000 | O | 28.827598000 | 26.880862000 | 30.426940000 |
| O  | 24.934203000 | 26.880849000 | 23.334882000 | O | 25.848909000 | 12.408453000 | 12.408455000 |
| O  | 25.848911000 | 25.848918000 | 25.848917000 | O | 23.334862000 | 11.493756000 | 13.440411000 |
| O  | 25.849015000 | 27.912768000 | 25.849028000 | O | 23.334855000 | 15.387135000 | 13.440484000 |
| O  | 27.912782000 | 25.849032000 | 25.849031000 | O | 23.334864000 | 13.440413000 | 11.493754000 |
| O  | 27.912889000 | 27.912886000 | 25.848919000 | O | 23.334856000 | 13.440488000 | 15.387138000 |
| O  | 26.880945000 | 28.827581000 | 23.334856000 | O | 24.934211000 | 9.894408000  | 13.440426000 |
| O  | 28.827591000 | 26.880922000 | 23.334870000 | O | 26.880889000 | 9.894413000  | 15.387149000 |
| O  | 24.934197000 | 23.334881000 | 26.880846000 | O | 27.912786000 | 12.408573000 | 12.408574000 |
| O  | 25.849012000 | 25.849025000 | 27.912771000 | O | 26.880878000 | 9.894407000  | 11.493761000 |
| O  | 27.912892000 | 25.848913000 | 27.912887000 | O | 28.827598000 | 9.894410000  | 13.440488000 |
| O  | 26.880944000 | 23.334850000 | 28.827576000 | O | 30.426944000 | 11.493755000 | 13.440484000 |
| O  | 28.827591000 | 23.334868000 | 26.880917000 | O | 30.426936000 | 15.387151000 | 13.440421000 |
| O  | 25.849012000 | 12.408579000 | 14.472325000 | O | 30.426946000 | 13.440483000 | 11.493756000 |
| O  | 25.848911000 | 14.472433000 | 14.472432000 | O | 30.426933000 | 13.440426000 | 15.387152000 |
| O  | 24.934197000 | 13.440504000 | 16.986469000 | O | 24.934210000 | 13.440425000 | 9.894409000  |
| O  | 26.880944000 | 11.493774000 | 16.986500000 | O | 26.880879000 | 11.493760000 | 9.894408000  |
| O  | 27.912892000 | 12.408463000 | 14.472437000 | O | 26.880889000 | 15.387147000 | 9.894411000  |
| O  | 27.912782000 | 14.472319000 | 14.472318000 | O | 28.827596000 | 13.440487000 | 9.894406000  |
| O  | 28.827591000 | 13.440433000 | 16.986482000 | C | 23.753697000 | 27.066116000 | 30.007949000 |
| O  | 25.849015000 | 14.472322000 | 12.408582000 | C | 23.753135000 | 30.008630000 | 27.063604000 |
| O  | 24.934203000 | 16.986468000 | 13.440501000 | C | 26.696398000 | 30.008246000 | 30.008106000 |
| O  | 27.912889000 | 14.472431000 | 12.408464000 | C | 30.007968000 | 30.008237000 | 26.695581000 |
| O  | 26.880945000 | 16.986494000 | 11.493769000 | C | 30.008286000 | 26.697416000 | 30.008420000 |
| O  | 28.827591000 | 16.986480000 | 13.440428000 | C | 23.753697000 | 10.313401000 | 13.255234000 |
| C  | 23.755332000 | 26.686089000 | 23.755213000 | C | 23.753135000 | 13.257746000 | 10.312720000 |
| Zr | 24.236612000 | 26.881475000 | 26.880552000 | C | 26.696398000 | 10.313244000 | 10.313104000 |
| Zr | 26.880671000 | 29.524609000 | 26.880680000 | C | 30.008286000 | 10.312930000 | 13.623934000 |
| Zr | 29.524440000 | 26.882357000 | 26.881381000 | C | 30.007968000 | 13.625768000 | 10.313113000 |
| C  | 27.064326000 | 30.008530000 | 23.753165000 | H | 27.351814000 | 30.759513000 | 23.002127000 |
| C  | 30.008123000 | 27.066993000 | 23.753823000 | H | 30.758179000 | 27.358190000 | 23.003211000 |
| C  | 23.755714000 | 23.756676000 | 26.684338000 | H | 23.008991000 | 23.009158000 | 26.377462000 |
| Zr | 26.880615000 | 26.881402000 | 29.524137000 | H | 27.355985000 | 23.003402000 | 30.758391000 |
| C  | 27.065914000 | 23.754135000 | 30.008060000 | H | 30.757581000 | 23.004153000 | 27.359935000 |
| C  | 30.007964000 | 23.754748000 | 27.067567000 | H | 23.008991000 | 13.943888000 | 17.312192000 |
| Zr | 24.236612000 | 13.440798000 | 13.439875000 | H | 27.355985000 | 9.562959000  | 17.317948000 |
| Zr | 26.880615000 | 10.797213000 | 13.439948000 | H | 30.757582000 | 12.961415000 | 17.317197000 |
| C  | 23.755714000 | 13.637012000 | 16.564674000 | H | 27.351814000 | 17.319223000 | 9.561837000  |
| C  | 27.065914000 | 10.313290000 | 16.567215000 | H | 30.758179000 | 17.318139000 | 12.963160000 |
| Zr | 29.524440000 | 13.439969000 | 13.438993000 | H | 23.003255000 | 27.356162000 | 30.758555000 |
| C  | 30.007964000 | 13.253783000 | 16.566602000 | H | 23.001913000 | 30.759916000 | 27.349810000 |
| Zr | 26.880671000 | 13.440670000 | 10.796741000 | H | 26.407446000 | 30.758917000 | 30.758911000 |
| C  | 23.755332000 | 16.566137000 | 13.635261000 | H | 30.758582000 | 30.758568000 | 26.405278000 |
| C  | 27.064326000 | 16.568185000 | 10.312820000 | H | 30.759373000 | 26.409850000 | 30.759355000 |
| C  | 30.008123000 | 16.567527000 | 13.254357000 | H | 23.003255000 | 9.562795000  | 12.965188000 |
| O  | 23.334855000 | 26.880866000 | 24.934215000 | H | 23.001913000 | 12.971540000 | 9.561434000  |
| O  | 23.334856000 | 24.934212000 | 26.880862000 | H | 26.407446000 | 9.562439000  | 9.562434000  |
| O  | 25.848909000 | 27.912895000 | 27.912897000 | H | 30.759373000 | 9.561995000  | 13.911500000 |

## ARTICLE

## Journal Name

|    |              |              |              |    |              |              |              |
|----|--------------|--------------|--------------|----|--------------|--------------|--------------|
| H  | 30.758582000 | 13.916071000 | 9.562782000  | O  | 14.472677000 | 27.913127000 | 12.408223000 |
| H  | 25.215026000 | 11.776433000 | 15.102845000 | C  | 16.593848000 | 26.880900000 | 16.593848000 |
| H  | 28.544134000 | 11.776251000 | 11.775822000 | C  | 17.650268000 | 26.880900000 | 17.650268000 |
| H  | 28.555271000 | 15.099035000 | 15.098322000 | C  | 19.634347000 | 26.880900000 | 19.634347000 |
| H  | 25.215244000 | 15.103495000 | 11.776660000 | O  | 9.894590000  | 26.880900000 | 15.387165000 |
| H  | 25.215244000 | 28.544690000 | 25.217855000 | C  | 10.287052000 | 26.880900000 | 16.593848000 |
| H  | 28.555271000 | 25.223028000 | 25.222315000 | Zr | 13.440450000 | 26.880900000 | 15.923976000 |
| H  | 28.544134000 | 28.545528000 | 28.545099000 | O  | 11.493735000 | 26.880900000 | 16.986310000 |
| H  | 25.215026000 | 25.218505000 | 28.544917000 | O  | 14.472677000 | 27.913127000 | 14.472677000 |
| O  | 14.472677000 | 25.848673000 | 14.472677000 | Zr | 13.440450000 | 26.880900000 | 10.956924000 |
| O  | 12.408223000 | 25.848673000 | 12.408223000 | O  | 11.493735000 | 26.880900000 | 9.894590000  |
| O  | 14.472677000 | 25.848673000 | 12.408223000 | O  | 15.387165000 | 26.880900000 | 9.894590000  |
| O  | 12.408223000 | 25.848673000 | 14.472677000 | O  | 12.408223000 | 27.913127000 | 12.408223000 |
| Zr | 13.440450000 | 24.397374000 | 13.440450000 | O  | 15.387165000 | 26.880900000 | 16.986310000 |
| O  | 11.493735000 | 23.335040000 | 13.440450000 | Zr | 13.440450000 | 29.364426000 | 13.440450000 |
| C  | 10.287052000 | 23.727502000 | 13.440450000 | O  | 11.493735000 | 30.426760000 | 13.440450000 |
| O  | 15.387165000 | 23.335040000 | 13.440450000 | C  | 10.287052000 | 30.034298000 | 13.440450000 |
| C  | 16.593848000 | 23.727502000 | 13.440450000 | O  | 15.387165000 | 30.426760000 | 13.440450000 |
| C  | 17.650268000 | 22.671082000 | 13.440450000 | C  | 16.593848000 | 30.034298000 | 13.440450000 |
| C  | 19.634347000 | 20.687003000 | 13.440450000 | O  | 16.986310000 | 28.827615000 | 13.440450000 |
| C  | 18.960712000 | 22.988008000 | 13.761408000 | O  | 9.894590000  | 28.827615000 | 13.440450000 |
| C  | 19.936757000 | 22.003898000 | 13.776461000 | C  | 22.671082000 | 26.880900000 | 22.671082000 |
| H  | 19.144577000 | 23.999268000 | 13.924306000 | C  | 20.687003000 | 26.880900000 | 20.687003000 |
| H  | 20.830009000 | 22.313835000 | 14.037206000 | C  | 21.360638000 | 27.201858000 | 22.988008000 |
| O  | 9.894590000  | 24.934185000 | 13.440450000 | C  | 20.384593000 | 27.216911000 | 22.003898000 |
| O  | 16.986310000 | 24.934185000 | 13.440450000 | H  | 21.176773000 | 27.364756000 | 23.999268000 |
| C  | 17.333342000 | 21.360638000 | 13.119492000 | H  | 19.491341000 | 27.477656000 | 22.313835000 |
| C  | 18.317452000 | 20.384593000 | 13.104439000 | O  | 13.440450000 | 28.827615000 | 16.986310000 |
| H  | 16.322082000 | 21.176773000 | 12.956594000 | C  | 13.440450000 | 30.034298000 | 16.593848000 |
| H  | 18.007515000 | 19.491341000 | 12.843694000 | O  | 13.440450000 | 28.827615000 | 9.894590000  |
| C  | 22.988008000 | 26.559942000 | 21.360638000 | C  | 13.440450000 | 30.034298000 | 10.287052000 |
| C  | 22.003898000 | 26.544889000 | 20.384593000 | O  | 13.440450000 | 30.426760000 | 15.387165000 |
| H  | 23.999268000 | 26.397044000 | 21.176773000 | O  | 13.440450000 | 30.426760000 | 11.493735000 |
| H  | 22.313835000 | 26.284144000 | 19.491341000 | C  | 17.333342000 | 27.201858000 | 18.960712000 |
| C  | 22.671082000 | 17.650268000 | 13.440450000 | C  | 18.317452000 | 27.216911000 | 19.936757000 |
| C  | 20.687003000 | 19.634347000 | 13.440450000 | H  | 16.322082000 | 27.364756000 | 19.144577000 |
| O  | 13.440450000 | 24.934185000 | 9.894590000  | H  | 18.007515000 | 27.477656000 | 20.830009000 |
| C  | 13.440450000 | 23.727502000 | 10.287052000 | H  | 13.440450000 | 30.790903000 | 9.530447000  |
| O  | 13.440450000 | 24.934185000 | 16.986310000 | H  | 17.350453000 | 26.880900000 | 9.530447000  |
| C  | 13.440450000 | 23.727502000 | 16.593848000 | H  | 17.350453000 | 30.790903000 | 13.440450000 |
| O  | 13.440450000 | 23.335040000 | 15.387165000 | H  | 13.440450000 | 30.790903000 | 17.350453000 |
| O  | 13.440450000 | 23.335040000 | 11.493735000 | H  | 9.530447000  | 30.790903000 | 13.440450000 |
| C  | 18.960712000 | 26.559942000 | 17.333342000 | H  | 9.530447000  | 26.880900000 | 17.350453000 |
| C  | 19.936757000 | 26.544889000 | 18.317452000 | H  | 13.440450000 | 22.970897000 | 9.530447000  |
| H  | 19.144577000 | 26.397044000 | 16.322082000 | H  | 9.530447000  | 22.970897000 | 13.440450000 |
| H  | 20.830009000 | 26.284144000 | 18.007515000 | H  | 13.440450000 | 22.970897000 | 17.350453000 |
| C  | 21.360638000 | 17.333342000 | 13.119492000 | H  | 15.026933000 | 25.294417000 | 11.853967000 |
| C  | 20.384593000 | 18.317452000 | 13.104439000 | H  | 11.853967000 | 28.467383000 | 11.853967000 |
| H  | 21.176773000 | 16.322082000 | 12.956594000 | H  | 9.530447000  | 26.880900000 | 9.530447000  |
| H  | 19.491341000 | 18.007515000 | 12.843694000 | H  | 15.026933000 | 28.467383000 | 15.026933000 |
| C  | 22.988008000 | 18.960712000 | 13.761408000 | H  | 11.853967000 | 25.294417000 | 15.026933000 |
| C  | 22.003898000 | 19.936757000 | 13.776461000 | H  | 26.939569000 | 23.843525000 | 20.920128000 |
| H  | 23.999268000 | 19.144577000 | 13.924306000 | H  | 26.667105000 | 19.395017000 | 16.475952000 |
| H  | 22.313835000 | 20.830009000 | 14.037206000 | H  | 26.242196000 | 19.264504000 | 22.495791000 |
| Zr | 10.956924000 | 26.880900000 | 13.440450000 | H  | 26.892044000 | 17.814070000 | 21.091968000 |
| O  | 9.894590000  | 26.880900000 | 11.493735000 | H  | 26.372257000 | 21.085702000 | 24.168098000 |
| O  | 12.408223000 | 27.913127000 | 14.472677000 | H  | 26.875283000 | 16.147292000 | 19.265683000 |
| C  | 10.287052000 | 26.880900000 | 10.287052000 | Cu | 27.020468000 | 22.233915000 | 18.420551000 |
| Zr | 15.923976000 | 26.880900000 | 13.440450000 | Cl | 25.119943000 | 23.887952000 | 18.691245000 |
| O  | 16.986310000 | 26.880900000 | 11.493735000 | C  | 28.482411000 | 23.905318000 | 16.621236000 |
| C  | 16.593848000 | 26.880900000 | 10.287052000 | C  | 28.108302000 | 22.650733000 | 16.884802000 |
| O  | 16.986310000 | 26.880900000 | 15.387165000 | H  | 28.468338000 | 21.916438000 | 16.152195000 |

|               |              |              |              |    |              |              |              |
|---------------|--------------|--------------|--------------|----|--------------|--------------|--------------|
| C             | 28.261195000 | 25.159572000 | 17.404407000 | O  | 27.912889000 | 27.912886000 | 25.848919000 |
| H             | 28.950222000 | 25.256566000 | 18.255008000 | O  | 26.880945000 | 28.827581000 | 23.334856000 |
| H             | 27.235445000 | 25.260220000 | 17.777639000 | O  | 28.827591000 | 26.880922000 | 23.334870000 |
| O             | 28.556516000 | 26.209802000 | 16.463710000 | O  | 24.934197000 | 23.334881000 | 26.880846000 |
| H             | 26.498610000 | 23.251477000 | 15.526109000 | O  | 25.849012000 | 25.849025000 | 27.912771000 |
| C             | 23.093387000 | 25.731688000 | 14.084722000 | O  | 27.912892000 | 25.848913000 | 27.912887000 |
| C             | 24.498360000 | 26.167279000 | 14.485727000 | O  | 26.880944000 | 23.334850000 | 28.827576000 |
| C             | 25.057202000 | 25.410150000 | 15.702735000 | O  | 28.827591000 | 23.334868000 | 26.880917000 |
| C             | 22.088996000 | 25.671486000 | 15.230033000 | O  | 25.849012000 | 12.408579000 | 14.472325000 |
| C             | 24.644907000 | 23.977217000 | 15.720056000 | O  | 25.848911000 | 14.472433000 | 14.472432000 |
| C             | 22.446808000 | 24.701399000 | 16.369158000 | O  | 24.934197000 | 13.440504000 | 16.986469000 |
| N             | 23.380398000 | 23.638949000 | 15.985960000 | O  | 26.880944000 | 11.493774000 | 16.986500000 |
| H             | 22.710726000 | 26.406884000 | 13.312857000 | O  | 27.912892000 | 12.408463000 | 14.472437000 |
| H             | 21.116108000 | 25.390898000 | 14.814027000 | O  | 27.912782000 | 14.472319000 | 14.472318000 |
| C             | 25.118230000 | 21.658881000 | 15.283013000 | O  | 28.827591000 | 13.440433000 | 16.986482000 |
| N             | 25.511809000 | 23.054022000 | 15.330294000 | O  | 25.849015000 | 14.472322000 | 12.408582000 |
| C             | 24.224837000 | 21.339663000 | 16.468345000 | O  | 24.934203000 | 16.986468000 | 13.440501000 |
| C             | 23.066040000 | 22.314804000 | 16.557057000 | O  | 27.912889000 | 14.472431000 | 12.408464000 |
| H             | 22.832538000 | 22.495143000 | 17.613868000 | O  | 26.880945000 | 16.986494000 | 11.493769000 |
| H             | 26.031841000 | 21.060417000 | 15.290556000 | O  | 28.827591000 | 16.986480000 | 13.440428000 |
| H             | 23.143919000 | 24.742274000 | 13.611689000 | C  | 23.755332000 | 26.686089000 | 23.755213000 |
| H             | 21.955310000 | 26.670458000 | 15.661199000 | Zr | 24.236612000 | 26.881475000 | 26.880552000 |
| H             | 22.157812000 | 21.951496000 | 16.066038000 | Zr | 26.880671000 | 29.524609000 | 26.880680000 |
| H             | 24.613354000 | 21.482733000 | 14.325885000 | Zr | 29.524440000 | 26.882357000 | 26.881381000 |
| H             | 24.514981000 | 27.236715000 | 14.720106000 | C  | 27.064326000 | 30.008530000 | 23.753165000 |
| H             | 25.171224000 | 26.029526000 | 13.633034000 | C  | 30.008123000 | 27.066993000 | 23.753823000 |
| H             | 23.851802000 | 20.313356000 | 16.407746000 | C  | 23.755714000 | 23.756676000 | 26.684338000 |
| H             | 24.830337000 | 21.423979000 | 17.377096000 | Zr | 26.880615000 | 26.881402000 | 29.524137000 |
| H             | 26.149535000 | 25.459818000 | 15.709970000 | C  | 27.065914000 | 23.754135000 | 30.008060000 |
| H             | 24.727208000 | 25.859479000 | 16.644034000 | C  | 30.007964000 | 23.754748000 | 27.067567000 |
| H             | 22.873365000 | 25.209241000 | 17.244325000 | Zr | 24.236612000 | 13.440798000 | 13.439875000 |
| H             | 21.545251000 | 24.194928000 | 16.721508000 | Zr | 26.880615000 | 10.797213000 | 13.439948000 |
| C             | 29.189511000 | 25.675687000 | 15.389749000 | C  | 23.755714000 | 13.637012000 | 16.564674000 |
| O             | 29.220954000 | 24.321479000 | 15.479438000 | C  | 27.065914000 | 10.313290000 | 16.567215000 |
| O             | 29.636241000 | 26.313124000 | 14.478161000 | Zr | 29.524440000 | 13.439969000 | 13.438993000 |
| <b>i. TS3</b> |              |              |              | C  | 30.007964000 | 13.253783000 | 16.566602000 |
| N             | 26.852584000 | 21.841482000 | 20.415762000 | Zr | 26.880671000 | 13.440670000 | 10.796741000 |
| N             | 26.618616000 | 19.930163000 | 18.476720000 | C  | 23.755332000 | 16.566137000 | 13.635261000 |
| C             | 26.694098000 | 20.554613000 | 20.821387000 | C  | 27.064326000 | 16.568185000 | 10.312820000 |
| C             | 26.816181000 | 22.834790000 | 21.327248000 | C  | 30.008123000 | 16.567527000 | 13.254357000 |
| C             | 26.663790000 | 19.008263000 | 17.495716000 | O  | 23.334855000 | 26.880866000 | 24.934215000 |
| C             | 26.724129000 | 19.515018000 | 19.770736000 | O  | 23.334856000 | 24.934212000 | 26.880862000 |
| C             | 26.506839000 | 20.269092000 | 22.184582000 | O  | 25.848909000 | 27.912895000 | 27.912897000 |
| C             | 26.708628000 | 22.624825000 | 22.705071000 | O  | 23.334862000 | 26.880939000 | 28.827594000 |
| C             | 26.748344000 | 17.623035000 | 17.699549000 | O  | 23.334864000 | 28.827596000 | 26.880937000 |
| C             | 26.855896000 | 18.146788000 | 20.060410000 | O  | 24.934210000 | 30.426941000 | 26.880925000 |
| C             | 26.541814000 | 21.290076000 | 23.120247000 | O  | 26.880889000 | 30.426939000 | 24.934203000 |
| C             | 26.845085000 | 17.208863000 | 19.041178000 | O  | 26.880879000 | 30.426942000 | 28.827590000 |
| C             | 26.809925000 | 23.730886000 | 23.728973000 | O  | 27.912786000 | 27.912776000 | 27.912777000 |
| C             | 26.809925000 | 16.592377000 | 16.590464000 | O  | 28.827596000 | 30.426944000 | 26.880863000 |
| O             | 26.880885000 | 24.934153000 | 23.334955000 | O  | 30.426933000 | 24.934198000 | 26.880924000 |
| O             | 26.880903000 | 23.334945000 | 24.934136000 | O  | 30.426936000 | 26.880929000 | 24.934199000 |
| O             | 26.880903000 | 15.387214000 | 16.986405000 | O  | 30.426944000 | 26.880866000 | 28.827595000 |
| O             | 26.880885000 | 16.986395000 | 15.387197000 | O  | 30.426946000 | 28.827594000 | 26.880867000 |
| Zr            | 26.878142000 | 26.881612000 | 24.237883000 | O  | 24.934211000 | 26.880924000 | 30.426942000 |
| Zr            | 26.878209000 | 24.239690000 | 26.880717000 | O  | 26.880889000 | 24.934201000 | 30.426937000 |
| Zr            | 26.878209000 | 13.440633000 | 16.081660000 | O  | 26.880878000 | 28.827589000 | 30.426943000 |
| Zr            | 26.878142000 | 16.083467000 | 13.439738000 | O  | 28.827598000 | 26.880862000 | 30.426940000 |
| O             | 24.934203000 | 26.880849000 | 23.334882000 | O  | 25.848909000 | 12.408453000 | 12.408455000 |
| O             | 25.848911000 | 25.848918000 | 25.848917000 | O  | 23.334862000 | 11.493756000 | 13.440411000 |
| O             | 25.849015000 | 27.912768000 | 25.849028000 | O  | 23.334855000 | 15.387135000 | 13.440484000 |
| O             | 27.912782000 | 25.849032000 | 25.849031000 | O  | 23.334864000 | 13.440413000 | 11.493754000 |

## ARTICLE

## Journal Name

|    |              |              |              |    |              |              |              |
|----|--------------|--------------|--------------|----|--------------|--------------|--------------|
| O  | 23.334856000 | 13.440488000 | 15.387138000 | C  | 19.634347000 | 20.687003000 | 13.440450000 |
| O  | 24.934211000 | 9.894408000  | 13.440426000 | C  | 18.960712000 | 22.988008000 | 13.761408000 |
| O  | 26.880889000 | 9.894413000  | 15.387149000 | C  | 19.936757000 | 22.003898000 | 13.776461000 |
| O  | 27.912786000 | 12.408573000 | 12.408574000 | H  | 19.144577000 | 23.999268000 | 13.924306000 |
| O  | 26.880878000 | 9.894407000  | 11.493761000 | H  | 20.830009000 | 22.313835000 | 14.037206000 |
| O  | 28.827598000 | 9.894410000  | 13.440488000 | O  | 9.894590000  | 24.934185000 | 13.440450000 |
| O  | 30.426944000 | 11.493755000 | 13.440484000 | O  | 16.986310000 | 24.934185000 | 13.440450000 |
| O  | 30.426936000 | 15.387151000 | 13.440421000 | C  | 17.333342000 | 21.360638000 | 13.119492000 |
| O  | 30.426946000 | 13.440483000 | 11.493756000 | C  | 18.317452000 | 20.384593000 | 13.104439000 |
| O  | 30.426933000 | 13.440426000 | 15.387152000 | H  | 16.322082000 | 21.176773000 | 12.956594000 |
| O  | 24.934210000 | 13.440425000 | 9.894409000  | H  | 18.007515000 | 19.491341000 | 12.843694000 |
| O  | 26.880879000 | 11.493760000 | 9.894408000  | C  | 22.988008000 | 26.559942000 | 21.360638000 |
| O  | 26.880889000 | 15.387147000 | 9.894411000  | C  | 22.003898000 | 26.544889000 | 20.384593000 |
| O  | 28.827596000 | 13.440487000 | 9.894406000  | H  | 23.999268000 | 26.397044000 | 21.176773000 |
| C  | 23.753697000 | 27.066116000 | 30.007949000 | H  | 22.313835000 | 26.284144000 | 19.491341000 |
| C  | 23.753135000 | 30.008630000 | 27.063604000 | C  | 22.671082000 | 17.650268000 | 13.440450000 |
| C  | 26.696398000 | 30.008246000 | 30.008106000 | C  | 20.687003000 | 19.634347000 | 13.440450000 |
| C  | 30.007968000 | 30.008237000 | 26.695581000 | O  | 13.440450000 | 24.934185000 | 9.894590000  |
| C  | 30.008286000 | 26.697416000 | 30.008420000 | C  | 13.440450000 | 23.727502000 | 10.287052000 |
| C  | 23.753697000 | 10.313401000 | 13.255234000 | O  | 13.440450000 | 24.934185000 | 16.986310000 |
| C  | 23.753135000 | 13.257746000 | 10.312720000 | C  | 13.440450000 | 23.727502000 | 16.593848000 |
| C  | 26.696398000 | 10.313244000 | 10.313104000 | O  | 13.440450000 | 23.335040000 | 15.387165000 |
| C  | 30.008286000 | 10.312930000 | 13.623934000 | O  | 13.440450000 | 23.335040000 | 11.493735000 |
| C  | 30.007968000 | 13.625768000 | 10.313113000 | C  | 18.960712000 | 26.559942000 | 17.333342000 |
| H  | 27.351814000 | 30.759513000 | 23.002127000 | C  | 19.936757000 | 26.544889000 | 18.317452000 |
| H  | 30.758179000 | 27.358190000 | 23.003211000 | H  | 19.144577000 | 26.397044000 | 16.322082000 |
| H  | 23.008991000 | 23.009158000 | 26.377462000 | H  | 20.830009000 | 26.284144000 | 18.007515000 |
| H  | 27.355985000 | 23.003402000 | 30.758391000 | C  | 21.360638000 | 17.333342000 | 13.119492000 |
| H  | 30.757581000 | 23.004153000 | 27.359935000 | C  | 20.384593000 | 18.317452000 | 13.104439000 |
| H  | 23.008991000 | 13.943888000 | 17.312192000 | H  | 21.176773000 | 16.322082000 | 12.956594000 |
| H  | 27.355985000 | 9.562959000  | 17.317948000 | H  | 19.491341000 | 18.007515000 | 12.843694000 |
| H  | 30.757582000 | 12.961415000 | 17.317197000 | C  | 22.988008000 | 18.960712000 | 13.761408000 |
| H  | 27.351814000 | 17.319223000 | 9.561837000  | C  | 22.003898000 | 19.936757000 | 13.776461000 |
| H  | 30.758179000 | 17.318139000 | 12.963160000 | H  | 23.999268000 | 19.144577000 | 13.924306000 |
| H  | 23.003255000 | 27.356162000 | 30.758555000 | H  | 22.313835000 | 20.830009000 | 14.037206000 |
| H  | 23.001913000 | 30.759916000 | 27.349810000 | Zr | 10.956924000 | 26.880900000 | 13.440450000 |
| H  | 26.407446000 | 30.758917000 | 30.758911000 | O  | 9.894590000  | 26.880900000 | 11.493735000 |
| H  | 30.758582000 | 30.758568000 | 26.405278000 | O  | 12.408223000 | 27.913127000 | 14.472677000 |
| H  | 30.759373000 | 26.409850000 | 30.759355000 | C  | 10.287052000 | 26.880900000 | 10.287052000 |
| H  | 23.003255000 | 9.562795000  | 12.965188000 | Zr | 15.923976000 | 26.880900000 | 13.440450000 |
| H  | 23.001913000 | 12.971540000 | 9.561434000  | O  | 16.986310000 | 26.880900000 | 11.493735000 |
| H  | 26.407446000 | 9.562439000  | 9.562434000  | C  | 16.593848000 | 26.880900000 | 10.287052000 |
| H  | 30.759373000 | 9.561995000  | 13.911500000 | O  | 16.986310000 | 26.880900000 | 15.387165000 |
| H  | 30.758582000 | 13.916071000 | 9.562782000  | O  | 14.472677000 | 27.913127000 | 12.408223000 |
| H  | 25.215026000 | 11.776433000 | 15.102845000 | C  | 16.593848000 | 26.880900000 | 16.593848000 |
| H  | 28.544134000 | 11.776251000 | 11.775822000 | C  | 17.650268000 | 26.880900000 | 17.650268000 |
| H  | 28.555271000 | 15.099035000 | 15.098322000 | C  | 19.634347000 | 26.880900000 | 19.634347000 |
| H  | 25.215244000 | 15.103495000 | 11.776660000 | O  | 9.894590000  | 26.880900000 | 15.387165000 |
| H  | 25.215244000 | 28.544690000 | 25.217855000 | C  | 10.287052000 | 26.880900000 | 16.593848000 |
| H  | 28.555271000 | 25.223028000 | 25.222315000 | Zr | 13.440450000 | 26.880900000 | 15.923976000 |
| H  | 28.544134000 | 28.545528000 | 28.545099000 | O  | 11.493735000 | 26.880900000 | 16.986310000 |
| H  | 25.215026000 | 25.218505000 | 28.544917000 | O  | 14.472677000 | 27.913127000 | 14.472677000 |
| O  | 14.472677000 | 25.848673000 | 14.472677000 | Zr | 13.440450000 | 26.880900000 | 10.956924000 |
| O  | 12.408223000 | 25.848673000 | 12.408223000 | O  | 11.493735000 | 26.880900000 | 9.894590000  |
| O  | 14.472677000 | 25.848673000 | 12.408223000 | O  | 15.387165000 | 26.880900000 | 9.894590000  |
| O  | 12.408223000 | 25.848673000 | 14.472677000 | O  | 12.408223000 | 27.913127000 | 12.408223000 |
| Zr | 13.440450000 | 24.397374000 | 13.440450000 | O  | 15.387165000 | 26.880900000 | 16.986310000 |
| O  | 11.493735000 | 23.335040000 | 13.440450000 | Zr | 13.440450000 | 29.364426000 | 13.440450000 |
| C  | 10.287052000 | 23.727502000 | 13.440450000 | O  | 11.493735000 | 30.426760000 | 13.440450000 |
| O  | 15.387165000 | 23.335040000 | 13.440450000 | C  | 10.287052000 | 30.034298000 | 13.440450000 |
| C  | 16.593848000 | 23.727502000 | 13.440450000 | O  | 15.387165000 | 30.426760000 | 13.440450000 |
| C  | 17.650268000 | 22.671082000 | 13.440450000 | C  | 16.593848000 | 30.034298000 | 13.440450000 |



| Journal Name |              |              |              | ARTICLE          |              |              |              |
|--------------|--------------|--------------|--------------|------------------|--------------|--------------|--------------|
| O            | 16.986310000 | 28.827615000 | 13.440450000 | H                | 25.883294000 | 20.908433000 | 15.417958000 |
| O            | 9.894590000  | 28.827615000 | 13.440450000 | H                | 23.213325000 | 24.634770000 | 13.597612000 |
| C            | 22.671082000 | 26.880900000 | 22.671082000 | H                | 22.016007000 | 26.650993000 | 15.555160000 |
| C            | 20.687003000 | 26.880900000 | 20.687003000 | H                | 22.016919000 | 21.947345000 | 16.094175000 |
| C            | 21.360638000 | 27.201858000 | 22.988008000 | H                | 24.545261000 | 21.465984000 | 14.419258000 |
| C            | 20.384593000 | 27.216911000 | 22.003898000 | H                | 24.623783000 | 27.111162000 | 14.688964000 |
| H            | 21.176773000 | 27.364756000 | 23.999268000 | H                | 25.281289000 | 25.839290000 | 13.674975000 |
| H            | 19.491341000 | 27.477656000 | 22.313835000 | H                | 23.628841000 | 20.248841000 | 16.419191000 |
| O            | 13.440450000 | 28.827615000 | 16.986310000 | H                | 24.600609000 | 21.276662000 | 17.472671000 |
| C            | 13.440450000 | 30.034298000 | 16.593848000 | H                | 26.144685000 | 25.307128000 | 15.804933000 |
| O            | 13.440450000 | 28.827615000 | 9.894590000  | H                | 24.685461000 | 25.785473000 | 16.661949000 |
| C            | 13.440450000 | 30.034298000 | 10.287052000 | H                | 22.795614000 | 25.184576000 | 17.194496000 |
| O            | 13.440450000 | 30.426760000 | 15.387165000 | H                | 21.465044000 | 24.202072000 | 16.621228000 |
| O            | 13.440450000 | 30.426760000 | 11.493735000 | C                | 30.234636000 | 25.360686000 | 17.280955000 |
| C            | 17.333342000 | 27.201858000 | 18.960712000 | O                | 29.854552000 | 24.117912000 | 16.843878000 |
| C            | 18.317452000 | 27.216911000 | 19.936757000 | O                | 31.309347000 | 25.844482000 | 17.083519000 |
| H            | 16.322082000 | 27.364756000 | 19.144577000 | <b>j. PC/DBU</b> |              |              |              |
| H            | 18.007515000 | 27.477656000 | 20.830009000 | N                | 26.670244000 | 21.871067000 | 20.401032000 |
| H            | 13.440450000 | 30.790903000 | 9.530447000  | N                | 26.468016000 | 19.915478000 | 18.459264000 |
| H            | 17.350453000 | 26.880900000 | 9.530447000  | C                | 26.632894000 | 20.574618000 | 20.796446000 |
| H            | 17.350453000 | 30.790903000 | 13.440450000 | C                | 26.681314000 | 22.849924000 | 21.323279000 |
| H            | 13.440450000 | 30.790903000 | 17.350453000 | C                | 26.513088000 | 19.000925000 | 17.480530000 |
| H            | 9.530447000  | 30.790903000 | 13.440450000 | C                | 26.650491000 | 19.521521000 | 19.738685000 |
| H            | 9.530447000  | 26.880900000 | 17.350453000 | C                | 26.605978000 | 20.270017000 | 22.164619000 |
| H            | 13.440450000 | 22.970897000 | 9.530447000  | C                | 26.697369000 | 22.625170000 | 22.703716000 |
| H            | 9.530447000  | 22.970897000 | 13.440450000 | C                | 26.719578000 | 17.626649000 | 17.692030000 |
| H            | 13.440450000 | 22.970897000 | 17.350453000 | C                | 26.880790000 | 18.172971000 | 20.042389000 |
| H            | 15.026933000 | 25.294417000 | 11.853967000 | C                | 26.654553000 | 21.284584000 | 23.110152000 |
| H            | 11.853967000 | 28.467383000 | 11.853967000 | C                | 26.903943000 | 17.231505000 | 19.023421000 |
| H            | 9.530447000  | 26.880900000 | 9.530447000  | C                | 26.809925000 | 23.730886000 | 23.728973000 |
| H            | 15.026933000 | 28.467383000 | 15.026933000 | C                | 26.809925000 | 16.592377000 | 16.590464000 |
| H            | 11.853967000 | 25.294417000 | 15.026933000 | O                | 26.880885000 | 24.934153000 | 23.334955000 |
| H            | 26.875637000 | 23.843373000 | 20.925941000 | O                | 26.880903000 | 23.334945000 | 24.934136000 |
| H            | 26.622371000 | 19.397256000 | 16.479768000 | O                | 26.880903000 | 15.387214000 | 16.986405000 |
| H            | 26.323581000 | 19.249749000 | 22.510212000 | O                | 26.880885000 | 16.986395000 | 15.387197000 |
| H            | 26.983400000 | 17.818193000 | 21.087218000 | Zr               | 26.878142000 | 26.881612000 | 24.237883000 |
| H            | 26.429919000 | 21.077866000 | 24.178603000 | Zr               | 26.878209000 | 24.239690000 | 26.880717000 |
| H            | 26.939449000 | 16.150334000 | 19.259933000 | Zr               | 26.878209000 | 13.440633000 | 16.808166000 |
| Cu           | 26.707811000 | 22.174618000 | 18.379399000 | Zr               | 26.878142000 | 16.083467000 | 13.439738000 |
| Cl           | 24.995075000 | 23.826302000 | 18.795497000 | O                | 24.934203000 | 26.880849000 | 23.334882000 |
| C            | 28.530790000 | 23.867621000 | 17.192786000 | O                | 25.848911000 | 25.848918000 | 25.848917000 |
| C            | 27.845984000 | 22.771948000 | 16.816781000 | O                | 25.849015000 | 27.912768000 | 25.849028000 |
| H            | 28.450566000 | 22.084239000 | 16.215358000 | O                | 27.912782000 | 25.849032000 | 25.849031000 |
| C            | 28.117098000 | 25.034968000 | 18.043530000 | O                | 27.912889000 | 27.912886000 | 25.848919000 |
| H            | 27.973214000 | 24.765200000 | 19.096758000 | O                | 26.880945000 | 28.827581000 | 23.334856000 |
| H            | 27.197979000 | 25.526116000 | 17.712139000 | O                | 28.827591000 | 26.880922000 | 23.334870000 |
| O            | 29.220522000 | 25.946184000 | 17.948493000 | O                | 24.934197000 | 23.334881000 | 26.880846000 |
| H            | 26.581431000 | 22.977210000 | 16.137015000 | O                | 25.849012000 | 25.849025000 | 27.912771000 |
| C            | 23.177085000 | 25.638342000 | 14.040254000 | O                | 27.912892000 | 25.848913000 | 27.912887000 |
| C            | 24.578590000 | 26.033901000 | 14.492456000 | O                | 26.880944000 | 23.334850000 | 28.827576000 |
| C            | 25.052893000 | 25.295126000 | 15.754660000 | O                | 28.827591000 | 23.334868000 | 26.880917000 |
| C            | 22.126026000 | 25.640281000 | 15.143765000 | O                | 25.849012000 | 12.408579000 | 14.472325000 |
| C            | 24.621215000 | 23.863872000 | 15.779395000 | O                | 25.848911000 | 14.472433000 | 14.472432000 |
| C            | 22.401048000 | 24.671373000 | 16.307115000 | O                | 24.934197000 | 13.440504000 | 16.986469000 |
| N            | 23.314236000 | 23.575402000 | 15.980104000 | O                | 26.880944000 | 11.493774000 | 16.986500000 |
| H            | 22.851672000 | 26.306346000 | 13.235894000 | O                | 27.912892000 | 12.408463000 | 14.472437000 |
| H            | 21.159163000 | 25.393791000 | 14.692710000 | O                | 27.912782000 | 14.472319000 | 14.472318000 |
| C            | 25.016891000 | 21.577651000 | 15.403341000 | O                | 28.827591000 | 13.440433000 | 16.986482000 |
| N            | 25.509473000 | 22.935120000 | 15.505650000 | O                | 25.849015000 | 14.472322000 | 12.408582000 |
| C            | 24.045444000 | 21.255383000 | 16.528313000 | O                | 24.934203000 | 16.986468000 | 13.440501000 |
| C            | 22.933916000 | 22.287605000 | 16.586926000 | O                | 27.912889000 | 14.472431000 | 12.408464000 |
| H            | 22.688322000 | 22.495688000 | 17.636340000 | O                | 26.880945000 | 16.986494000 | 11.493769000 |

## ARTICLE

## Journal Name

|    |              |              |              |    |              |              |              |
|----|--------------|--------------|--------------|----|--------------|--------------|--------------|
| O  | 28.827591000 | 16.986480000 | 13.440428000 | C  | 23.753697000 | 10.313401000 | 13.255234000 |
| C  | 23.755332000 | 26.686089000 | 23.755213000 | C  | 23.753135000 | 13.257746000 | 10.312720000 |
| Zr | 24.236612000 | 26.881475000 | 26.880552000 | C  | 26.696398000 | 10.313244000 | 10.313104000 |
| Zr | 26.880671000 | 29.524609000 | 26.880680000 | C  | 30.008286000 | 10.312930000 | 13.623934000 |
| Zr | 29.524440000 | 26.882357000 | 26.881381000 | C  | 30.007968000 | 13.625768000 | 10.313113000 |
| C  | 27.064326000 | 30.008530000 | 23.753165000 | H  | 27.351814000 | 30.759513000 | 23.002127000 |
| C  | 30.008123000 | 27.066993000 | 23.753823000 | H  | 30.758179000 | 27.358190000 | 23.003211000 |
| C  | 23.755714000 | 23.756676000 | 26.684338000 | H  | 23.008991000 | 23.009158000 | 26.377462000 |
| Zr | 26.880615000 | 26.881402000 | 29.524137000 | H  | 27.355985000 | 23.003402000 | 30.758391000 |
| C  | 27.065914000 | 23.754135000 | 30.008060000 | H  | 30.757581000 | 23.004153000 | 27.359935000 |
| C  | 30.007964000 | 23.754748000 | 27.067567000 | H  | 23.008991000 | 13.943888000 | 17.312192000 |
| Zr | 24.236612000 | 13.440798000 | 13.439875000 | H  | 27.355985000 | 9.562959000  | 17.317948000 |
| Zr | 26.880615000 | 10.797213000 | 13.439948000 | H  | 30.757582000 | 12.961415000 | 17.317197000 |
| C  | 23.755714000 | 13.637012000 | 16.564674000 | H  | 27.351814000 | 17.319223000 | 9.561837000  |
| C  | 27.065914000 | 10.313290000 | 16.567215000 | H  | 30.758179000 | 17.318139000 | 12.963160000 |
| Zr | 29.524440000 | 13.439969000 | 13.438993000 | H  | 23.003255000 | 27.356162000 | 30.758555000 |
| C  | 30.007964000 | 13.253783000 | 16.566602000 | H  | 23.001913000 | 30.759916000 | 27.349810000 |
| Zr | 26.880671000 | 13.440670000 | 10.796741000 | H  | 26.407446000 | 30.758917000 | 30.758911000 |
| C  | 23.755332000 | 16.566137000 | 13.635261000 | H  | 30.758582000 | 30.758568000 | 26.405278000 |
| C  | 27.064326000 | 16.568185000 | 10.312820000 | H  | 30.759373000 | 26.409850000 | 30.759355000 |
| C  | 30.008123000 | 16.567527000 | 13.254357000 | H  | 23.003255000 | 9.562795000  | 12.965188000 |
| O  | 23.334855000 | 26.880866000 | 24.934215000 | H  | 23.001913000 | 12.971540000 | 9.561434000  |
| O  | 23.334856000 | 24.934212000 | 26.880862000 | H  | 26.407446000 | 9.562439000  | 9.562434000  |
| O  | 25.848909000 | 27.912895000 | 27.912897000 | H  | 30.759373000 | 9.561995000  | 13.911500000 |
| O  | 23.334862000 | 26.880939000 | 28.827594000 | H  | 30.758582000 | 13.916071000 | 9.562782000  |
| O  | 23.334864000 | 28.827596000 | 26.880937000 | H  | 25.215026000 | 11.776433000 | 15.102845000 |
| O  | 24.934210000 | 30.426941000 | 26.880925000 | H  | 28.544134000 | 11.776251000 | 11.775822000 |
| O  | 26.880889000 | 30.426939000 | 24.934203000 | H  | 28.555271000 | 15.099035000 | 15.098322000 |
| O  | 26.880879000 | 30.426942000 | 28.827590000 | H  | 25.215244000 | 15.103495000 | 11.776660000 |
| O  | 27.912786000 | 27.912776000 | 27.912777000 | H  | 25.215244000 | 28.544690000 | 25.217855000 |
| O  | 28.827596000 | 30.426944000 | 26.880863000 | H  | 28.555271000 | 25.223028000 | 25.222315000 |
| O  | 30.426933000 | 24.934198000 | 26.880924000 | H  | 28.544134000 | 28.545528000 | 28.545099000 |
| O  | 30.426936000 | 26.880929000 | 24.934199000 | H  | 25.215026000 | 25.218505000 | 28.544917000 |
| O  | 30.426944000 | 26.880866000 | 28.827595000 | O  | 14.472677000 | 25.848673000 | 14.472677000 |
| O  | 30.426946000 | 28.827594000 | 26.880867000 | O  | 12.408223000 | 25.848673000 | 12.408223000 |
| O  | 24.934211000 | 26.880924000 | 30.426942000 | O  | 14.472677000 | 25.848673000 | 12.408223000 |
| O  | 26.880889000 | 24.934201000 | 30.426937000 | O  | 12.408223000 | 25.848673000 | 14.472677000 |
| O  | 26.880878000 | 28.827589000 | 30.426943000 | Zr | 13.440450000 | 24.397374000 | 13.440450000 |
| O  | 28.827598000 | 26.880862000 | 30.426940000 | O  | 11.493735000 | 23.335040000 | 13.440450000 |
| O  | 25.848909000 | 12.408453000 | 12.408455000 | C  | 10.287052000 | 23.727502000 | 13.440450000 |
| O  | 23.334862000 | 11.493756000 | 13.440411000 | O  | 15.387165000 | 23.335040000 | 13.440450000 |
| O  | 23.334855000 | 15.387135000 | 13.440484000 | C  | 16.593848000 | 23.727502000 | 13.440450000 |
| O  | 23.334864000 | 13.440413000 | 11.493754000 | C  | 17.650268000 | 22.671082000 | 13.440450000 |
| O  | 23.334856000 | 13.440488000 | 15.387138000 | C  | 19.634347000 | 20.687003000 | 13.440450000 |
| O  | 24.934211000 | 9.894408000  | 13.440426000 | C  | 18.960712000 | 22.988008000 | 13.761408000 |
| O  | 26.880889000 | 9.894413000  | 15.387149000 | C  | 19.936757000 | 22.003898000 | 13.776461000 |
| O  | 27.912786000 | 12.408573000 | 12.408574000 | H  | 19.144577000 | 23.999268000 | 13.924306000 |
| O  | 26.880878000 | 9.894407000  | 11.493761000 | H  | 20.830009000 | 22.313835000 | 14.037206000 |
| O  | 28.827598000 | 9.894410000  | 13.440488000 | O  | 9.894590000  | 24.934185000 | 13.440450000 |
| O  | 30.426944000 | 11.493755000 | 13.440484000 | O  | 16.986310000 | 24.934185000 | 13.440450000 |
| O  | 30.426936000 | 15.387151000 | 13.440421000 | C  | 17.333342000 | 21.360638000 | 13.119492000 |
| O  | 30.426946000 | 13.440483000 | 11.493756000 | C  | 18.317452000 | 20.384593000 | 13.104439000 |
| O  | 30.426933000 | 13.440426000 | 15.387152000 | H  | 16.322082000 | 21.176773000 | 12.956594000 |
| O  | 24.934210000 | 13.440425000 | 9.894409000  | H  | 18.007515000 | 19.491341000 | 12.843694000 |
| O  | 26.880879000 | 11.493760000 | 9.894408000  | C  | 22.988008000 | 26.559942000 | 21.360638000 |
| O  | 26.880889000 | 15.387147000 | 9.894411000  | C  | 22.003898000 | 26.544889000 | 20.384593000 |
| O  | 28.827596000 | 13.440487000 | 9.894406000  | H  | 23.999268000 | 26.397044000 | 21.176773000 |
| C  | 23.753697000 | 27.066116000 | 30.007949000 | H  | 22.313835000 | 26.284144000 | 19.491341000 |
| C  | 23.753135000 | 30.008630000 | 27.063604000 | C  | 22.671082000 | 17.650268000 | 13.440450000 |
| C  | 26.696398000 | 30.008246000 | 30.008106000 | C  | 20.687003000 | 19.634347000 | 13.440450000 |
| C  | 30.007968000 | 30.008237000 | 26.695581000 | O  | 13.440450000 | 24.934185000 | 9.894590000  |
| C  | 30.008286000 | 26.697416000 | 30.008420000 | C  | 13.440450000 | 23.727502000 | 10.287052000 |

| Journal Name | ARTICLE      |              |              |              |              |              |              |
|--------------|--------------|--------------|--------------|--------------|--------------|--------------|--------------|
| O            | 13.440450000 | 24.934185000 | 16.986310000 | H            | 17.350453000 | 26.880900000 | 9.530447000  |
| C            | 13.440450000 | 23.727502000 | 16.593848000 | H            | 17.350453000 | 30.790903000 | 13.440450000 |
| O            | 13.440450000 | 23.335040000 | 15.387165000 | H            | 13.440450000 | 30.790903000 | 17.350453000 |
| O            | 13.440450000 | 23.335040000 | 11.493735000 | H            | 9.530447000  | 30.790903000 | 13.440450000 |
| C            | 18.960712000 | 26.559942000 | 17.333342000 | H            | 9.530447000  | 26.880900000 | 17.350453000 |
| C            | 19.936757000 | 26.544889000 | 18.317452000 | H            | 13.440450000 | 22.970897000 | 9.530447000  |
| H            | 19.144577000 | 26.397044000 | 16.322082000 | H            | 9.530447000  | 22.970897000 | 13.440450000 |
| H            | 20.830009000 | 26.284144000 | 18.007515000 | H            | 13.440450000 | 22.970897000 | 17.350453000 |
| C            | 21.360638000 | 17.333342000 | 13.119492000 | H            | 15.026933000 | 25.294417000 | 11.853967000 |
| C            | 20.384593000 | 18.317452000 | 13.104439000 | H            | 11.853967000 | 28.467383000 | 11.853967000 |
| H            | 21.176773000 | 16.322082000 | 12.956594000 | H            | 9.530447000  | 26.880900000 | 9.530447000  |
| H            | 19.491341000 | 18.007515000 | 12.843694000 | H            | 15.026933000 | 28.467383000 | 15.026933000 |
| C            | 22.988008000 | 18.960712000 | 13.761408000 | H            | 11.853967000 | 25.294417000 | 15.026933000 |
| C            | 22.003898000 | 19.936757000 | 13.776461000 | H            | 26.690969000 | 23.862789000 | 20.932591000 |
| H            | 23.999268000 | 19.144577000 | 13.924306000 | H            | 26.370309000 | 19.380620000 | 16.469804000 |
| H            | 22.313835000 | 20.830009000 | 14.037206000 | H            | 26.555546000 | 19.238160000 | 22.494315000 |
| Zr           | 10.956924000 | 26.880900000 | 13.440450000 | H            | 27.078758000 | 17.859421000 | 21.061809000 |
| O            | 9.894590000  | 26.880900000 | 11.493735000 | H            | 26.663064000 | 21.054304000 | 24.170609000 |
| O            | 12.408223000 | 27.913127000 | 14.472677000 | H            | 27.087579000 | 16.184304000 | 19.240838000 |
| C            | 10.287052000 | 26.880900000 | 10.287052000 | Cu           | 26.875695000 | 22.267551000 | 18.363904000 |
| Zr           | 15.923976000 | 26.880900000 | 13.440450000 | Cl           | 25.120209000 | 23.492976000 | 17.734713000 |
| O            | 16.986310000 | 26.880900000 | 11.493735000 | C            | 28.961705000 | 22.025657000 | 18.335588000 |
| C            | 16.593848000 | 26.880900000 | 10.287052000 | C            | 28.453001000 | 22.236391000 | 17.075683000 |
| O            | 16.986310000 | 26.880900000 | 15.387165000 | H            | 28.318272000 | 21.399601000 | 16.397681000 |
| O            | 14.472677000 | 27.913127000 | 12.408223000 | C            | 29.605488000 | 22.982264000 | 19.294203000 |
| C            | 16.593848000 | 26.880900000 | 16.593848000 | H            | 28.974340000 | 23.826010000 | 19.580162000 |
| C            | 17.650268000 | 26.880900000 | 17.650268000 | H            | 30.553228000 | 23.386214000 | 18.916069000 |
| C            | 19.634347000 | 26.880900000 | 19.634347000 | O            | 29.879387000 | 22.148501000 | 20.435417000 |
| O            | 9.894590000  | 26.880900000 | 15.387165000 | H            | 28.491413000 | 23.237733000 | 16.664087000 |
| C            | 10.287052000 | 26.880900000 | 16.593848000 | C            | 26.557743000 | 28.564333000 | 19.554364000 |
| Zr           | 13.440450000 | 26.880900000 | 15.923976000 | C            | 26.962360000 | 27.378016000 | 20.420873000 |
| O            | 11.493735000 | 26.880900000 | 16.986310000 | C            | 27.043112000 | 26.025992000 | 19.688289000 |
| O            | 14.472677000 | 27.913127000 | 14.472677000 | C            | 25.233911000 | 28.411233000 | 18.814927000 |
| Zr           | 13.440450000 | 26.880900000 | 10.956924000 | C            | 27.355790000 | 26.092282000 | 18.218384000 |
| O            | 11.493735000 | 26.880900000 | 9.894590000  | C            | 25.126463000 | 27.102776000 | 18.023768000 |
| O            | 15.387165000 | 26.880900000 | 9.894590000  | N            | 26.390917000 | 26.677286000 | 17.433206000 |
| O            | 12.408223000 | 27.913127000 | 12.408223000 | H            | 26.523545000 | 29.464854000 | 20.179528000 |
| O            | 15.387165000 | 26.880900000 | 16.986310000 | H            | 25.113113000 | 29.265469000 | 18.137026000 |
| Zr           | 13.440450000 | 29.364426000 | 13.440450000 | C            | 28.747515000 | 25.749633000 | 16.386301000 |
| O            | 11.493735000 | 30.426760000 | 13.440450000 | N            | 28.498891000 | 25.627373000 | 17.813043000 |
| C            | 10.287052000 | 30.034298000 | 13.440450000 | C            | 27.485592000 | 25.540333000 | 15.563280000 |
| O            | 15.387165000 | 30.426760000 | 13.440450000 | C            | 26.446149000 | 26.558403000 | 15.979840000 |
| C            | 16.593848000 | 30.034298000 | 13.440450000 | H            | 25.455259000 | 26.247450000 | 15.626669000 |
| O            | 16.986310000 | 28.827615000 | 13.440450000 | H            | 29.526241000 | 25.027771000 | 16.101389000 |
| O            | 9.894590000  | 28.827615000 | 13.440450000 | H            | 27.348605000 | 28.740592000 | 18.813594000 |
| C            | 22.671082000 | 26.880900000 | 22.671082000 | H            | 24.394487000 | 28.461135000 | 19.520141000 |
| C            | 20.687003000 | 26.880900000 | 20.687003000 | H            | 26.657353000 | 27.543226000 | 15.532712000 |
| C            | 21.360638000 | 27.201858000 | 22.988008000 | H            | 29.173405000 | 26.742768000 | 16.164603000 |
| C            | 20.384593000 | 27.216911000 | 22.003898000 | H            | 26.266280000 | 27.282823000 | 21.261327000 |
| H            | 21.176773000 | 27.364756000 | 23.999268000 | H            | 27.937944000 | 27.599466000 | 20.864107000 |
| H            | 19.491341000 | 27.477656000 | 22.313835000 | H            | 27.677946000 | 25.618791000 | 14.488332000 |
| O            | 13.440450000 | 28.827615000 | 16.986310000 | H            | 27.082376000 | 24.539254000 | 15.762958000 |
| C            | 13.440450000 | 30.034298000 | 16.593848000 | H            | 27.833404000 | 25.425817000 | 20.148062000 |
| O            | 13.440450000 | 28.827615000 | 9.894590000  | H            | 26.105101000 | 25.468008000 | 19.805045000 |
| C            | 13.440450000 | 30.034298000 | 10.287052000 | H            | 24.728231000 | 26.290732000 | 18.643980000 |
| O            | 13.440450000 | 30.426760000 | 15.387165000 | H            | 24.409098000 | 27.216074000 | 17.206046000 |
| O            | 13.440450000 | 30.426760000 | 11.493735000 | C            | 29.730153000 | 20.854430000 | 20.097108000 |
| C            | 17.333342000 | 27.201858000 | 18.960712000 | O            | 29.294115000 | 20.750580000 | 18.799932000 |
| C            | 18.317452000 | 27.216911000 | 19.936757000 | O            | 29.928704000 | 19.914434000 | 20.810886000 |
| H            | 16.322082000 | 27.364756000 | 19.144577000 | <b>k. PC</b> |              |              |              |
| H            | 18.007515000 | 27.477656000 | 20.830009000 | N            | 26.670403000 | 21.857746000 | 20.402816000 |
| H            | 13.440450000 | 30.790903000 | 9.530447000  | N            | 26.513102000 | 19.914349000 | 18.466663000 |

## ARTICLE

## Journal Name

|    |              |              |              |   |              |              |              |
|----|--------------|--------------|--------------|---|--------------|--------------|--------------|
| C  | 26.628261000 | 20.564081000 | 20.807109000 | C | 27.064326000 | 16.568185000 | 10.312820000 |
| C  | 26.677955000 | 22.848297000 | 21.313613000 | C | 30.008123000 | 16.567527000 | 13.254357000 |
| C  | 26.557037000 | 19.003320000 | 17.482988000 | O | 23.334855000 | 26.880866000 | 24.934215000 |
| C  | 26.643038000 | 19.510001000 | 19.750745000 | O | 23.334856000 | 24.934212000 | 26.880862000 |
| C  | 26.602377000 | 20.267287000 | 22.176000000 | O | 25.848909000 | 27.912895000 | 27.912897000 |
| C  | 26.695462000 | 22.629132000 | 22.697819000 | O | 23.334862000 | 26.880939000 | 28.827594000 |
| C  | 26.715743000 | 17.623874000 | 17.694680000 | O | 23.334864000 | 28.827596000 | 26.880937000 |
| C  | 26.819133000 | 18.153511000 | 20.052865000 | O | 24.934210000 | 30.426941000 | 26.880925000 |
| C  | 26.654308000 | 21.290541000 | 23.111592000 | O | 26.880889000 | 30.426939000 | 24.934203000 |
| C  | 26.847078000 | 17.217257000 | 19.029331000 | O | 26.880879000 | 30.426942000 | 28.827590000 |
| C  | 26.809925000 | 23.730886000 | 23.728973000 | O | 27.912786000 | 27.912776000 | 27.912777000 |
| C  | 26.809925000 | 16.592377000 | 16.590464000 | O | 28.827596000 | 30.426944000 | 26.880863000 |
| O  | 26.880885000 | 24.934153000 | 23.334955000 | O | 30.426933000 | 24.934198000 | 26.880924000 |
| O  | 26.880903000 | 23.334945000 | 24.934136000 | O | 30.426936000 | 26.880929000 | 24.934199000 |
| O  | 26.880903000 | 15.387214000 | 16.986405000 | O | 30.426944000 | 26.880866000 | 28.827595000 |
| O  | 26.880885000 | 16.986395000 | 15.387197000 | O | 30.426946000 | 28.827594000 | 26.880867000 |
| Zr | 26.878142000 | 26.881612000 | 24.237883000 | O | 24.934211000 | 26.880924000 | 30.426942000 |
| Zr | 26.878209000 | 24.239690000 | 26.880717000 | O | 26.880889000 | 24.934201000 | 30.426937000 |
| Zr | 26.878209000 | 13.440633000 | 16.081660000 | O | 26.880878000 | 28.827589000 | 30.426943000 |
| Zr | 26.878142000 | 16.083467000 | 13.439738000 | O | 28.827598000 | 26.880862000 | 30.426940000 |
| O  | 24.934203000 | 26.880849000 | 23.334882000 | O | 25.848909000 | 12.408453000 | 12.408455000 |
| O  | 25.848911000 | 25.848918000 | 25.848917000 | O | 23.334862000 | 11.493756000 | 13.440411000 |
| O  | 25.849015000 | 27.912768000 | 25.849028000 | O | 23.334855000 | 15.387135000 | 13.440484000 |
| O  | 27.912782000 | 25.849032000 | 25.849031000 | O | 23.334864000 | 13.440413000 | 11.493754000 |
| O  | 27.912889000 | 27.912886000 | 25.848919000 | O | 23.334856000 | 13.440488000 | 15.387138000 |
| O  | 26.880945000 | 28.827581000 | 23.334856000 | O | 24.934211000 | 9.894408000  | 13.440426000 |
| O  | 28.827591000 | 26.880922000 | 23.334870000 | O | 26.880889000 | 9.894413000  | 15.387149000 |
| O  | 24.934197000 | 23.334881000 | 26.880846000 | O | 27.912786000 | 12.408573000 | 12.408574000 |
| O  | 25.849012000 | 25.849025000 | 27.912771000 | O | 26.880878000 | 9.894407000  | 11.493761000 |
| O  | 27.912892000 | 25.848913000 | 27.912887000 | O | 28.827598000 | 9.894410000  | 13.440488000 |
| O  | 26.880944000 | 23.334850000 | 28.827576000 | O | 30.426944000 | 11.493755000 | 13.440484000 |
| O  | 28.827591000 | 23.334868000 | 26.880917000 | O | 30.426936000 | 15.387151000 | 13.440421000 |
| O  | 25.849012000 | 12.408579000 | 14.472325000 | O | 30.426946000 | 13.440483000 | 11.493756000 |
| O  | 25.848911000 | 14.472433000 | 14.472432000 | O | 30.426933000 | 13.440426000 | 15.387152000 |
| O  | 24.934197000 | 13.440504000 | 16.986469000 | O | 24.934210000 | 13.440425000 | 9.894409000  |
| O  | 26.880944000 | 11.493774000 | 16.986500000 | O | 26.880879000 | 11.493760000 | 9.894408000  |
| O  | 27.912892000 | 12.408463000 | 14.472437000 | O | 26.880889000 | 15.387147000 | 9.894411000  |
| O  | 27.912782000 | 14.472319000 | 14.472318000 | O | 28.827596000 | 13.440487000 | 9.894406000  |
| O  | 28.827591000 | 13.440433000 | 16.986482000 | C | 23.753697000 | 27.066116000 | 30.007949000 |
| O  | 25.849015000 | 14.472322000 | 12.408582000 | C | 23.753135000 | 30.008630000 | 27.063604000 |
| O  | 24.934203000 | 16.986468000 | 13.440501000 | C | 26.696398000 | 30.008246000 | 30.008106000 |
| O  | 27.912889000 | 14.472431000 | 12.408464000 | C | 30.007968000 | 30.008237000 | 26.695581000 |
| O  | 26.880945000 | 16.986494000 | 11.493769000 | C | 30.008286000 | 26.697416000 | 30.008420000 |
| O  | 28.827591000 | 16.986480000 | 13.440428000 | C | 23.753697000 | 10.313401000 | 13.255234000 |
| C  | 23.755332000 | 26.686089000 | 23.755213000 | C | 23.753135000 | 13.257746000 | 10.312720000 |
| Zr | 24.236612000 | 26.881475000 | 26.880552000 | C | 26.696398000 | 10.313244000 | 10.313104000 |
| Zr | 26.880671000 | 29.524609000 | 26.880680000 | C | 30.008286000 | 10.312930000 | 13.623934000 |
| Zr | 29.524440000 | 26.882357000 | 26.881381000 | C | 30.007968000 | 13.625768000 | 10.313113000 |
| C  | 27.064326000 | 30.008530000 | 23.753165000 | H | 27.351814000 | 30.759513000 | 23.002127000 |
| C  | 30.008123000 | 27.066993000 | 23.753823000 | H | 30.758179000 | 27.358190000 | 23.003211000 |
| C  | 23.755714000 | 23.756676000 | 26.684338000 | H | 23.008991000 | 23.009158000 | 26.377462000 |
| Zr | 26.880615000 | 26.881402000 | 29.524137000 | H | 27.355985000 | 23.003402000 | 30.758391000 |
| C  | 27.065914000 | 23.754135000 | 30.008060000 | H | 30.757581000 | 23.004153000 | 27.359935000 |
| C  | 30.007964000 | 23.754748000 | 27.067567000 | H | 23.008991000 | 13.943888000 | 17.312192000 |
| Zr | 24.236612000 | 13.440798000 | 13.439875000 | H | 27.355985000 | 9.562959000  | 17.317948000 |
| Zr | 26.880615000 | 10.797213000 | 13.439948000 | H | 30.757582000 | 12.961415000 | 17.317197000 |
| C  | 23.755714000 | 13.637012000 | 16.564674000 | H | 27.351814000 | 17.319223000 | 9.561837000  |
| C  | 27.065914000 | 10.313290000 | 16.567215000 | H | 30.758179000 | 17.318139000 | 12.963160000 |
| Zr | 29.524440000 | 13.439969000 | 13.438993000 | H | 23.003255000 | 27.356162000 | 30.758555000 |
| C  | 30.007964000 | 13.253783000 | 16.566602000 | H | 23.001913000 | 30.759916000 | 27.349810000 |
| Zr | 26.880671000 | 13.440670000 | 10.796741000 | H | 26.407446000 | 30.758917000 | 30.758911000 |
| C  | 23.755332000 | 16.566137000 | 13.635261000 | H | 30.758582000 | 30.758568000 | 26.405278000 |

| Journal Name |              |              |              | ARTICLE |              |              |              |
|--------------|--------------|--------------|--------------|---------|--------------|--------------|--------------|
| H            | 30.759373000 | 26.409850000 | 30.759355000 | C       | 10.287052000 | 26.880900000 | 10.287052000 |
| H            | 23.003255000 | 9.562795000  | 12.965188000 | Zr      | 15.923976000 | 26.880900000 | 13.440450000 |
| H            | 23.001913000 | 12.971540000 | 9.561434000  | O       | 16.986310000 | 26.880900000 | 11.493735000 |
| H            | 26.407446000 | 9.562439000  | 9.562434000  | C       | 16.593848000 | 26.880900000 | 10.287052000 |
| H            | 30.759373000 | 9.561995000  | 13.911500000 | O       | 16.986310000 | 26.880900000 | 15.387165000 |
| H            | 30.758582000 | 13.916071000 | 9.562782000  | O       | 14.472677000 | 27.913127000 | 12.408223000 |
| H            | 25.215026000 | 11.776433000 | 15.102845000 | C       | 16.593848000 | 26.880900000 | 16.593848000 |
| H            | 28.544134000 | 11.776251000 | 11.775822000 | C       | 17.650268000 | 26.880900000 | 17.650268000 |
| H            | 28.555271000 | 15.099035000 | 15.098322000 | C       | 19.634347000 | 26.880900000 | 19.634347000 |
| H            | 25.215244000 | 15.103495000 | 11.776660000 | O       | 9.894590000  | 26.880900000 | 15.387165000 |
| H            | 25.215244000 | 28.544690000 | 25.217855000 | C       | 10.287052000 | 26.880900000 | 16.593848000 |
| H            | 28.555271000 | 25.223028000 | 25.222315000 | Zr      | 13.440450000 | 26.880900000 | 15.923976000 |
| H            | 28.544134000 | 28.545528000 | 28.545099000 | O       | 11.493735000 | 26.880900000 | 16.986310000 |
| H            | 25.215026000 | 25.218505000 | 28.544917000 | O       | 14.472677000 | 27.913127000 | 14.472677000 |
| O            | 14.472677000 | 25.848673000 | 14.472677000 | Zr      | 13.440450000 | 26.880900000 | 10.956924000 |
| O            | 12.408223000 | 25.848673000 | 12.408223000 | O       | 11.493735000 | 26.880900000 | 9.894590000  |
| O            | 14.472677000 | 25.848673000 | 12.408223000 | O       | 15.387165000 | 26.880900000 | 9.894590000  |
| O            | 12.408223000 | 25.848673000 | 14.472677000 | O       | 12.408223000 | 27.913127000 | 12.408223000 |
| Zr           | 13.440450000 | 24.397374000 | 13.440450000 | O       | 15.387165000 | 26.880900000 | 16.986310000 |
| O            | 11.493735000 | 23.335040000 | 13.440450000 | Zr      | 13.440450000 | 29.364426000 | 13.440450000 |
| C            | 10.287052000 | 23.727502000 | 13.440450000 | O       | 11.493735000 | 30.426760000 | 13.440450000 |
| O            | 15.387165000 | 23.335040000 | 13.440450000 | C       | 10.287052000 | 30.034298000 | 13.440450000 |
| C            | 16.593848000 | 23.727502000 | 13.440450000 | O       | 15.387165000 | 30.426760000 | 13.440450000 |
| C            | 17.650268000 | 22.671082000 | 13.440450000 | C       | 16.593848000 | 30.034298000 | 13.440450000 |
| C            | 19.634347000 | 20.687003000 | 13.440450000 | O       | 16.986310000 | 28.827615000 | 13.440450000 |
| C            | 18.960712000 | 22.988008000 | 13.761408000 | O       | 9.894590000  | 28.827615000 | 13.440450000 |
| C            | 19.936757000 | 22.003898000 | 13.776461000 | C       | 22.671082000 | 26.880900000 | 22.671082000 |
| H            | 19.144577000 | 23.999268000 | 13.924306000 | C       | 20.687003000 | 26.880900000 | 20.687003000 |
| H            | 20.830009000 | 22.313835000 | 14.037206000 | C       | 21.360638000 | 27.201858000 | 22.988008000 |
| O            | 9.894590000  | 24.934185000 | 13.440450000 | C       | 20.384593000 | 27.216911000 | 22.003898000 |
| O            | 16.986310000 | 24.934185000 | 13.440450000 | H       | 21.176773000 | 27.364756000 | 23.999268000 |
| C            | 17.333342000 | 21.360638000 | 13.119492000 | H       | 19.491341000 | 27.477656000 | 22.313835000 |
| C            | 18.317452000 | 20.384593000 | 13.104439000 | O       | 13.440450000 | 28.827615000 | 16.986310000 |
| H            | 16.322082000 | 21.176773000 | 12.956594000 | C       | 13.440450000 | 30.034298000 | 16.593848000 |
| H            | 18.007515000 | 19.491341000 | 12.843694000 | O       | 13.440450000 | 28.827615000 | 9.894590000  |
| C            | 22.988008000 | 26.559942000 | 21.360638000 | C       | 13.440450000 | 30.034298000 | 10.287052000 |
| C            | 22.003898000 | 26.544889000 | 20.384593000 | O       | 13.440450000 | 30.426760000 | 15.387165000 |
| H            | 23.999268000 | 26.397044000 | 21.176773000 | O       | 13.440450000 | 30.426760000 | 11.493735000 |
| H            | 22.313835000 | 26.284144000 | 19.491341000 | C       | 17.333342000 | 27.201858000 | 18.960712000 |
| C            | 22.671082000 | 17.650268000 | 13.440450000 | C       | 18.317452000 | 27.216911000 | 19.936757000 |
| C            | 20.687003000 | 19.634347000 | 13.440450000 | H       | 16.322082000 | 27.364756000 | 19.144577000 |
| O            | 13.440450000 | 24.934185000 | 9.894590000  | H       | 18.007515000 | 27.477656000 | 20.830009000 |
| C            | 13.440450000 | 23.727502000 | 10.287052000 | H       | 13.440450000 | 30.790903000 | 9.530447000  |
| O            | 13.440450000 | 24.934185000 | 16.986310000 | H       | 17.350453000 | 26.880900000 | 9.530447000  |
| C            | 13.440450000 | 23.727502000 | 16.593848000 | H       | 17.350453000 | 30.790903000 | 13.440450000 |
| O            | 13.440450000 | 23.335040000 | 15.387165000 | H       | 13.440450000 | 30.790903000 | 17.350453000 |
| O            | 13.440450000 | 23.335040000 | 11.493735000 | H       | 9.530447000  | 30.790903000 | 13.440450000 |
| C            | 18.960712000 | 26.559942000 | 17.333342000 | H       | 9.530447000  | 26.880900000 | 17.350453000 |
| C            | 19.936757000 | 26.544889000 | 18.317452000 | H       | 13.440450000 | 22.970897000 | 9.530447000  |
| H            | 19.144577000 | 26.397044000 | 16.322082000 | H       | 9.530447000  | 22.970897000 | 13.440450000 |
| H            | 20.830009000 | 26.284144000 | 18.007515000 | H       | 13.440450000 | 22.970897000 | 17.350453000 |
| C            | 21.360638000 | 17.333342000 | 13.119492000 | H       | 15.026933000 | 25.294417000 | 11.853967000 |
| C            | 20.384593000 | 18.317452000 | 13.104439000 | H       | 11.853967000 | 28.467383000 | 11.853967000 |
| H            | 21.176773000 | 16.322082000 | 12.956594000 | H       | 9.530447000  | 26.880900000 | 9.530447000  |
| H            | 19.491341000 | 18.007515000 | 12.843694000 | H       | 15.026933000 | 28.467383000 | 15.026933000 |
| C            | 22.988008000 | 18.960712000 | 13.761408000 | H       | 11.853967000 | 25.294417000 | 15.026933000 |
| C            | 22.003898000 | 19.936757000 | 13.776461000 | H       | 26.676961000 | 23.859568000 | 20.909974000 |
| H            | 23.999268000 | 19.144577000 | 13.924306000 | H       | 26.456869000 | 19.392888000 | 16.471164000 |
| H            | 22.313835000 | 20.830009000 | 14.037206000 | H       | 26.554203000 | 19.238251000 | 22.514767000 |
| Zr           | 10.956924000 | 26.880900000 | 13.440450000 | H       | 26.970028000 | 17.827714000 | 21.076430000 |
| O            | 9.894590000  | 26.880900000 | 11.493735000 | H       | 26.665891000 | 21.069518000 | 24.173887000 |
| O            | 12.408223000 | 27.913127000 | 14.472677000 | H       | 26.992251000 | 16.164067000 | 19.246212000 |

|                                   |              |              |              |    |              |              |              |
|-----------------------------------|--------------|--------------|--------------|----|--------------|--------------|--------------|
| Cu                                | 26.957638000 | 22.159661000 | 18.353341000 | Zr | 24.236612000 | 26.881475000 | 26.880552000 |
| Cl                                | 25.416470000 | 23.554747000 | 17.600763000 | Zr | 26.880671000 | 29.524609000 | 26.880680000 |
| C                                 | 29.046854000 | 21.925172000 | 18.435733000 | Zr | 29.524440000 | 26.882357000 | 26.881381000 |
| C                                 | 28.609955000 | 22.210661000 | 17.163346000 | C  | 27.064326000 | 30.008530000 | 23.753165000 |
| H                                 | 28.526769000 | 21.416205000 | 16.428746000 | C  | 30.008123000 | 27.066993000 | 23.753823000 |
| C                                 | 29.621618000 | 22.823061000 | 19.492360000 | C  | 23.755714000 | 23.756676000 | 26.684338000 |
| H                                 | 28.955684000 | 23.631309000 | 19.807462000 | Zr | 26.880615000 | 26.881402000 | 29.524137000 |
| H                                 | 30.591083000 | 23.252354000 | 19.205379000 | C  | 27.065914000 | 23.754135000 | 30.008060000 |
| O                                 | 29.828974000 | 21.928556000 | 20.593639000 | C  | 30.007964000 | 23.754748000 | 27.067567000 |
| H                                 | 28.635522000 | 23.232123000 | 16.800366000 | Zr | 24.236612000 | 13.440798000 | 13.439875000 |
| C                                 | 29.728993000 | 20.651804000 | 20.161662000 | Zr | 26.880615000 | 10.797213000 | 13.439948000 |
| O                                 | 29.377670000 | 20.627485000 | 18.838056000 | C  | 23.755714000 | 13.637012000 | 16.564674000 |
| O                                 | 29.905756000 | 19.676262000 | 20.829671000 | C  | 27.065914000 | 10.313290000 | 16.567215000 |
| <b>3. CuBr-UiO-67(bpy) system</b> |              |              |              |    |              |              |              |
| <b>a. Isolated</b>                |              |              |              |    |              |              |              |
| N                                 | 26.706241000 | 21.848241000 | 20.406162000 | Zr | 29.524440000 | 13.439969000 | 13.438993000 |
| N                                 | 26.609182000 | 19.928424000 | 18.458099000 | C  | 30.007964000 | 13.253783000 | 16.566602000 |
| C                                 | 26.629413000 | 20.564982000 | 20.818309000 | Zr | 26.880671000 | 13.440670000 | 10.796741000 |
| C                                 | 26.725952000 | 22.840130000 | 21.307492000 | C  | 23.755332000 | 16.566137000 | 13.635261000 |
| C                                 | 26.649925000 | 19.002752000 | 17.471156000 | C  | 27.064326000 | 16.568185000 | 10.312820000 |
| C                                 | 26.642836000 | 19.517322000 | 19.759255000 | C  | 30.008123000 | 16.567527000 | 13.254357000 |
| C                                 | 26.550976000 | 20.266194000 | 22.186340000 | O  | 23.334855000 | 26.880866000 | 24.934215000 |
| C                                 | 26.694996000 | 22.629873000 | 22.697140000 | O  | 23.334856000 | 24.934212000 | 26.880862000 |
| C                                 | 26.709655000 | 17.622766000 | 17.695070000 | O  | 25.848909000 | 27.912895000 | 27.912897000 |
| C                                 | 26.697383000 | 18.149949000 | 20.053089000 | O  | 23.334862000 | 26.880939000 | 28.827594000 |
| C                                 | 26.595364000 | 21.295668000 | 23.116784000 | O  | 23.334864000 | 28.827596000 | 26.880937000 |
| C                                 | 26.725204000 | 17.208244000 | 19.035041000 | O  | 24.934210000 | 30.426941000 | 26.880925000 |
| C                                 | 26.809925000 | 23.730886000 | 23.728973000 | O  | 26.880889000 | 30.426939000 | 24.934203000 |
| C                                 | 26.809925000 | 16.592377000 | 16.590464000 | O  | 26.880879000 | 30.426942000 | 28.827590000 |
| O                                 | 26.880885000 | 24.934153000 | 23.334955000 | O  | 27.912786000 | 27.912776000 | 27.912777000 |
| O                                 | 26.880903000 | 23.334945000 | 24.934136000 | O  | 28.827596000 | 30.426944000 | 26.880863000 |
| O                                 | 26.880903000 | 15.387214000 | 16.986405000 | O  | 30.426933000 | 24.934198000 | 26.880924000 |
| O                                 | 26.880885000 | 16.986395000 | 15.387197000 | O  | 30.426936000 | 26.880929000 | 24.934199000 |
| Zr                                | 26.878142000 | 26.881612000 | 24.237883000 | O  | 30.426944000 | 26.880866000 | 28.827595000 |
| Zr                                | 26.878209000 | 24.239690000 | 26.880717000 | O  | 30.426946000 | 28.827594000 | 26.880867000 |
| Zr                                | 26.878209000 | 13.440633000 | 16.081660000 | O  | 24.934211000 | 26.880924000 | 30.426942000 |
| Zr                                | 26.878142000 | 16.083467000 | 13.439738000 | O  | 26.880889000 | 24.934201000 | 30.426937000 |
| O                                 | 24.934203000 | 26.880849000 | 23.334882000 | O  | 26.880878000 | 28.827589000 | 30.426943000 |
| O                                 | 25.848911000 | 25.848918000 | 25.848917000 | O  | 28.827598000 | 26.880862000 | 30.426940000 |
| O                                 | 25.849015000 | 27.912768000 | 25.849028000 | O  | 25.848909000 | 12.408453000 | 12.408455000 |
| O                                 | 27.912782000 | 25.849032000 | 25.849031000 | O  | 23.334862000 | 11.493756000 | 13.440411000 |
| O                                 | 27.912889000 | 27.912886000 | 25.848919000 | O  | 23.334855000 | 15.387135000 | 13.440484000 |
| O                                 | 26.880945000 | 28.827581000 | 23.334856000 | O  | 23.334864000 | 13.440413000 | 11.493754000 |
| O                                 | 28.827591000 | 26.880922000 | 23.334870000 | O  | 23.334856000 | 13.440488000 | 15.387138000 |
| O                                 | 24.934197000 | 23.334881000 | 26.880846000 | O  | 24.934211000 | 9.894408000  | 13.440426000 |
| O                                 | 25.849012000 | 25.849025000 | 27.912771000 | O  | 26.880889000 | 9.894413000  | 15.387149000 |
| O                                 | 27.912892000 | 25.848913000 | 27.912887000 | O  | 27.912786000 | 12.408573000 | 12.408574000 |
| O                                 | 26.880944000 | 23.334850000 | 28.827576000 | O  | 26.880878000 | 9.894407000  | 11.493761000 |
| O                                 | 28.827591000 | 23.334868000 | 26.880917000 | O  | 28.827598000 | 9.894410000  | 13.440488000 |
| O                                 | 25.849012000 | 12.408579000 | 14.472325000 | O  | 30.426944000 | 11.493755000 | 13.440484000 |
| O                                 | 25.848911000 | 14.472433000 | 14.472432000 | O  | 30.426936000 | 15.387151000 | 13.440421000 |
| O                                 | 24.934197000 | 13.440504000 | 16.986469000 | O  | 30.426946000 | 13.440483000 | 11.493756000 |
| O                                 | 26.880944000 | 11.493774000 | 16.986500000 | O  | 30.426933000 | 13.440426000 | 15.387152000 |
| O                                 | 27.912892000 | 12.408463000 | 14.472437000 | O  | 24.934210000 | 13.440425000 | 9.894409000  |
| O                                 | 27.912782000 | 14.472319000 | 14.472318000 | O  | 26.880879000 | 11.493760000 | 9.894408000  |
| O                                 | 28.827591000 | 13.440433000 | 16.986482000 | O  | 26.880889000 | 15.387147000 | 9.894411000  |
| O                                 | 25.849015000 | 14.472322000 | 12.408582000 | O  | 28.827596000 | 13.440487000 | 9.894406000  |
| O                                 | 24.934203000 | 16.986468000 | 13.440501000 | C  | 23.753697000 | 27.066116000 | 30.007949000 |
| O                                 | 27.912889000 | 14.472431000 | 12.408464000 | C  | 23.753135000 | 30.008630000 | 27.063604000 |
| O                                 | 26.880945000 | 16.986494000 | 11.493769000 | C  | 26.696398000 | 30.008246000 | 30.008106000 |
| O                                 | 28.827591000 | 16.986480000 | 13.440428000 | C  | 30.007968000 | 30.008237000 | 26.695581000 |
| C                                 | 23.755332000 | 26.686089000 | 23.755213000 | C  | 30.008286000 | 26.697416000 | 30.008420000 |
|                                   |              |              |              | C  | 23.753697000 | 10.313401000 | 13.255234000 |
|                                   |              |              |              | C  | 23.753135000 | 13.257746000 | 10.312720000 |

|    |              |              |              |    |              |              |              |
|----|--------------|--------------|--------------|----|--------------|--------------|--------------|
| C  | 26.696398000 | 10.313244000 | 10.313104000 | O  | 13.440450000 | 23.335040000 | 15.387165000 |
| C  | 30.008286000 | 10.312930000 | 13.623934000 | O  | 13.440450000 | 23.335040000 | 11.493735000 |
| C  | 30.007968000 | 13.625768000 | 10.313113000 | C  | 18.960712000 | 26.559942000 | 17.333342000 |
| H  | 27.351814000 | 30.759513000 | 23.002127000 | C  | 19.936757000 | 26.544889000 | 18.317452000 |
| H  | 30.758179000 | 27.358190000 | 23.003211000 | H  | 19.144577000 | 26.397044000 | 16.322082000 |
| H  | 23.008991000 | 23.009158000 | 26.377462000 | H  | 20.830009000 | 26.284144000 | 18.007515000 |
| H  | 27.355985000 | 23.003402000 | 30.758391000 | C  | 21.360638000 | 17.333342000 | 13.119492000 |
| H  | 30.757581000 | 23.004153000 | 27.359935000 | C  | 20.384593000 | 18.317452000 | 13.104439000 |
| H  | 23.008991000 | 13.943888000 | 17.312192000 | H  | 21.176773000 | 16.322082000 | 12.956594000 |
| H  | 27.355985000 | 9.562959000  | 17.317948000 | H  | 19.491341000 | 18.007515000 | 12.843694000 |
| H  | 30.757582000 | 12.961415000 | 17.317197000 | C  | 22.988008000 | 18.960712000 | 13.761408000 |
| H  | 27.351814000 | 17.319223000 | 9.561837000  | C  | 22.003898000 | 19.936757000 | 13.776461000 |
| H  | 30.758179000 | 17.318139000 | 12.963160000 | H  | 23.999268000 | 19.144577000 | 13.924306000 |
| H  | 23.003255000 | 27.356162000 | 30.758555000 | H  | 22.313835000 | 20.830009000 | 14.037206000 |
| H  | 23.001913000 | 30.759916000 | 27.349810000 | Zr | 10.956924000 | 26.880900000 | 13.440450000 |
| H  | 26.407446000 | 30.758917000 | 30.758911000 | O  | 9.894590000  | 26.880900000 | 11.493735000 |
| H  | 30.758582000 | 30.758568000 | 26.405278000 | O  | 12.408223000 | 27.913127000 | 14.472677000 |
| H  | 30.759373000 | 26.409850000 | 30.759355000 | C  | 10.287052000 | 26.880900000 | 10.287052000 |
| H  | 23.003255000 | 9.562795000  | 12.965188000 | Zr | 15.923976000 | 26.880900000 | 13.440450000 |
| H  | 23.001913000 | 12.971540000 | 9.561434000  | O  | 16.986310000 | 26.880900000 | 11.493735000 |
| H  | 26.407446000 | 9.562439000  | 9.562434000  | C  | 16.593848000 | 26.880900000 | 10.287052000 |
| H  | 30.759373000 | 9.561995000  | 13.911500000 | O  | 16.986310000 | 26.880900000 | 15.387165000 |
| H  | 30.758582000 | 13.916071000 | 9.562782000  | O  | 14.472677000 | 27.913127000 | 12.408223000 |
| H  | 25.215026000 | 11.776433000 | 15.102845000 | C  | 16.593848000 | 26.880900000 | 16.593848000 |
| H  | 28.544134000 | 11.776251000 | 11.775822000 | C  | 17.650268000 | 26.880900000 | 17.650268000 |
| H  | 28.555271000 | 15.099035000 | 15.098322000 | C  | 19.634347000 | 26.880900000 | 19.634347000 |
| H  | 25.215244000 | 15.103495000 | 11.776660000 | O  | 9.894590000  | 26.880900000 | 15.387165000 |
| H  | 25.215244000 | 28.544690000 | 25.217855000 | C  | 10.287052000 | 26.880900000 | 16.593848000 |
| H  | 28.555271000 | 25.223028000 | 25.222315000 | Zr | 13.440450000 | 26.880900000 | 15.923976000 |
| H  | 28.544134000 | 28.545528000 | 28.545099000 | O  | 11.493735000 | 26.880900000 | 16.986310000 |
| H  | 25.215026000 | 25.218505000 | 28.544917000 | O  | 14.472677000 | 27.913127000 | 14.472677000 |
| O  | 14.472677000 | 25.848673000 | 14.472677000 | Zr | 13.440450000 | 26.880900000 | 10.956924000 |
| O  | 12.408223000 | 25.848673000 | 12.408223000 | O  | 11.493735000 | 26.880900000 | 9.894590000  |
| O  | 14.472677000 | 25.848673000 | 12.408223000 | O  | 15.387165000 | 26.880900000 | 9.894590000  |
| O  | 12.408223000 | 25.848673000 | 14.472677000 | O  | 12.408223000 | 27.913127000 | 12.408223000 |
| Zr | 13.440450000 | 24.397374000 | 13.440450000 | O  | 15.387165000 | 26.880900000 | 16.986310000 |
| O  | 11.493735000 | 23.335040000 | 13.440450000 | Zr | 13.440450000 | 29.364426000 | 13.440450000 |
| C  | 10.287052000 | 23.727502000 | 13.440450000 | O  | 11.493735000 | 30.426760000 | 13.440450000 |
| O  | 15.387165000 | 23.335040000 | 13.440450000 | C  | 10.287052000 | 30.034298000 | 13.440450000 |
| C  | 16.593848000 | 23.727502000 | 13.440450000 | O  | 15.387165000 | 30.426760000 | 13.440450000 |
| C  | 17.650268000 | 22.671082000 | 13.440450000 | C  | 16.593848000 | 30.034298000 | 13.440450000 |
| C  | 19.634347000 | 20.687003000 | 13.440450000 | O  | 16.986310000 | 28.827615000 | 13.440450000 |
| C  | 18.960712000 | 22.988008000 | 13.761408000 | O  | 9.894590000  | 28.827615000 | 13.440450000 |
| C  | 19.936757000 | 22.003898000 | 13.776461000 | C  | 22.671082000 | 26.880900000 | 22.671082000 |
| H  | 19.144577000 | 23.999268000 | 13.924306000 | C  | 20.687003000 | 26.880900000 | 20.687003000 |
| H  | 20.830009000 | 22.313835000 | 14.037206000 | C  | 21.360638000 | 27.201858000 | 22.988008000 |
| O  | 9.894590000  | 24.934185000 | 13.440450000 | C  | 20.384593000 | 27.216911000 | 22.003898000 |
| O  | 16.986310000 | 24.934185000 | 13.440450000 | H  | 21.176773000 | 27.364756000 | 23.999268000 |
| C  | 17.333342000 | 21.360638000 | 13.119492000 | H  | 19.491341000 | 27.477656000 | 22.313835000 |
| C  | 18.317452000 | 20.384593000 | 13.104439000 | O  | 13.440450000 | 28.827615000 | 16.986310000 |
| H  | 16.322082000 | 21.176773000 | 12.956594000 | C  | 13.440450000 | 30.034298000 | 16.593848000 |
| H  | 18.007515000 | 19.491341000 | 12.843694000 | O  | 13.440450000 | 28.827615000 | 9.894590000  |
| C  | 22.988008000 | 26.559942000 | 21.360638000 | C  | 13.440450000 | 30.034298000 | 10.287052000 |
| C  | 22.003898000 | 26.544889000 | 20.384593000 | O  | 13.440450000 | 30.426760000 | 15.387165000 |
| H  | 23.999268000 | 26.397044000 | 21.176773000 | O  | 13.440450000 | 30.426760000 | 11.493735000 |
| H  | 22.313835000 | 26.284144000 | 19.491341000 | C  | 17.333342000 | 27.201858000 | 18.960712000 |
| C  | 22.671082000 | 17.650268000 | 13.440450000 | C  | 18.317452000 | 27.216911000 | 19.936757000 |
| C  | 20.687003000 | 19.634347000 | 13.440450000 | H  | 16.322082000 | 27.364756000 | 19.144577000 |
| O  | 13.440450000 | 24.934185000 | 9.894590000  | H  | 18.007515000 | 27.477656000 | 20.830009000 |
| C  | 13.440450000 | 23.727502000 | 10.287052000 | H  | 13.440450000 | 30.790903000 | 9.530447000  |
| O  | 13.440450000 | 24.934185000 | 16.986310000 | H  | 17.350453000 | 26.880900000 | 9.530447000  |
| C  | 13.440450000 | 23.727502000 | 16.593848000 | H  | 17.350453000 | 30.790903000 | 13.440450000 |

## ARTICLE

## Journal Name

|              |              |              |              |    |              |              |               |
|--------------|--------------|--------------|--------------|----|--------------|--------------|---------------|
| H            | 13.440450000 | 30.790903000 | 17.350453000 | O  | 24.934203000 | 16.986468000 | 13.440501000  |
| H            | 9.530447000  | 30.790903000 | 13.440450000 | O  | 27.912889000 | 14.472431000 | 12.408464000  |
| H            | 9.530447000  | 26.880900000 | 17.350453000 | O  | 26.880945000 | 16.986494000 | 11.493769000  |
| H            | 13.440450000 | 22.970897000 | 9.530447000  | O  | 28.827591000 | 16.986480000 | 13.440428000  |
| H            | 9.530447000  | 22.970897000 | 13.440450000 | C  | 23.755332000 | 26.686089000 | 23.755213000  |
| H            | 13.440450000 | 22.970897000 | 17.350453000 | Zr | 24.236612000 | 26.881475000 | 26.880552000  |
| H            | 15.026933000 | 25.294417000 | 11.853967000 | Zr | 26.880671000 | 29.524609000 | 26.880680000  |
| H            | 11.853967000 | 28.467383000 | 11.853967000 | Zr | 29.524440000 | 26.882357000 | 26.881381000  |
| H            | 9.530447000  | 26.880900000 | 9.530447000  | C  | 27.064326000 | 30.008530000 | 23.753165000  |
| H            | 15.026933000 | 28.467383000 | 15.026933000 | C  | 30.008123000 | 27.066993000 | 23.753823000  |
| H            | 11.853967000 | 25.294417000 | 15.026933000 | C  | 23.755714000 | 23.756676000 | 26.684338000  |
| H            | 26.781175000 | 23.847605000 | 20.898484000 | Zr | 26.880615000 | 26.881402000 | 29.524137000  |
| H            | 26.634880000 | 19.392510000 | 16.457154000 | C  | 27.065914000 | 23.754135000 | 30.008060000  |
| H            | 26.457962000 | 19.241865000 | 22.532511000 | C  | 30.007964000 | 23.754748000 | 27.067567000  |
| H            | 26.734082000 | 17.816722000 | 21.084622000 | Zr | 24.236612000 | 13.440798000 | 13.439875000  |
| H            | 26.558693000 | 21.081992000 | 24.180288000 | Zr | 26.880615000 | 10.797213000 | 13.439948000  |
| H            | 26.775575000 | 16.147803000 | 19.258199000 | C  | 23.755714000 | 13.637012000 | 16.564674000  |
| Cu           | 26.497338000 | 21.856866000 | 18.117508000 | C  | 27.065914000 | 10.313290000 | 16.567215000  |
| Br           | 26.230162000 | 23.863041000 | 17.170980000 | Zr | 29.524440000 | 13.439969000 | 13.438993000  |
| <b>b. PA</b> |              |              |              | C  | 30.007964000 | 13.253783000 | 16.566602000  |
| N            | 26.712602000 | 21.883909000 | 20.389258000 | Zr | 26.880671000 | 13.440670000 | 10.796741000  |
| N            | 26.396711000 | 19.905339000 | 18.454258000 | C  | 23.755332000 | 16.566137000 | 13.635261000  |
| C            | 26.661087000 | 20.598091000 | 20.791799000 | C  | 27.064326000 | 16.568185000 | 10.312820000  |
| C            | 26.725047000 | 22.856937000 | 21.306744000 | C  | 30.008123000 | 16.567527000 | 13.254357000  |
| C            | 26.441243000 | 18.983088000 | 17.476126000 | O  | 23.334855000 | 26.880866000 | 24.934215000  |
| C            | 26.674521000 | 19.542817000 | 19.733384000 | O  | 23.334856000 | 24.934212000 | 26.880862000  |
| C            | 26.603925000 | 20.278421000 | 22.154861000 | O  | 25.848909000 | 27.912895000 | 27.912897000  |
| C            | 26.704986000 | 22.633847000 | 22.694774000 | O  | 23.334862000 | 26.880939000 | 28.827594000  |
| C            | 26.725572000 | 17.626831000 | 17.690333000 | O  | 23.334864000 | 28.827596000 | 26.880937000  |
| C            | 26.976191000 | 18.207098000 | 20.022872000 | O  | 24.934210000 | 30.426941000 | 26.880925000  |
| C            | 26.629798000 | 21.295784000 | 23.100118000 | O  | 26.880889000 | 30.426939000 | 24.934203000  |
| C            | 26.982150000 | 17.252628000 | 19.014879000 | O  | 26.880879000 | 30.426942000 | 28.827590000  |
| C            | 26.809925000 | 23.730886000 | 23.728973000 | O  | 27.912786000 | 27.912776000 | 27.912777000  |
| C            | 26.809925000 | 16.592377000 | 16.590464000 | O  | 28.827596000 | 30.426944000 | 26.880863000  |
| O            | 26.880885000 | 24.934153000 | 23.334955000 | O  | 30.426933000 | 24.934198000 | 26.880924000  |
| O            | 26.880903000 | 23.334945000 | 24.934136000 | O  | 30.426936000 | 26.880929000 | 24.934199000  |
| O            | 26.880903000 | 15.387214000 | 16.986405000 | O  | 30.426944000 | 26.880866000 | 26.8827595000 |
| O            | 26.880885000 | 16.986395000 | 15.387197000 | O  | 30.426946000 | 28.827594000 | 28.880867000  |
| Zr           | 26.878142000 | 26.881612000 | 24.237883000 | O  | 24.934211000 | 26.880924000 | 30.426942000  |
| Zr           | 26.878209000 | 24.239690000 | 26.880717000 | O  | 26.880889000 | 24.934201000 | 30.426937000  |
| Zr           | 26.878209000 | 13.440633000 | 16.081660000 | O  | 26.880878000 | 28.827589000 | 30.426943000  |
| Zr           | 26.878142000 | 16.083467000 | 13.439738000 | O  | 28.827598000 | 26.880862000 | 30.426940000  |
| O            | 24.934203000 | 26.880849000 | 23.334882000 | O  | 25.848909000 | 12.408453000 | 12.408455000  |
| O            | 25.848911000 | 25.848918000 | 25.848917000 | O  | 23.334862000 | 11.493756000 | 13.440411000  |
| O            | 25.849015000 | 27.912768000 | 25.849028000 | O  | 23.334855000 | 15.387135000 | 13.440484000  |
| O            | 27.912782000 | 25.849032000 | 25.849031000 | O  | 23.334864000 | 13.440413000 | 11.493754000  |
| O            | 27.912889000 | 27.912886000 | 25.848919000 | O  | 23.334856000 | 13.440488000 | 15.387138000  |
| O            | 26.880945000 | 28.827581000 | 23.334856000 | O  | 24.934211000 | 9.894408000  | 13.440426000  |
| O            | 28.827591000 | 26.880922000 | 23.334870000 | O  | 26.880889000 | 9.894413000  | 15.387149000  |
| O            | 24.934197000 | 23.334881000 | 26.880846000 | O  | 27.912786000 | 12.408573000 | 12.408574000  |
| O            | 25.849012000 | 25.849025000 | 27.912771000 | O  | 26.880878000 | 9.894407000  | 11.493761000  |
| O            | 27.912892000 | 25.848913000 | 27.912887000 | O  | 28.827598000 | 9.894410000  | 13.440488000  |
| O            | 26.880944000 | 23.334850000 | 28.827576000 | O  | 30.426944000 | 11.493755000 | 13.440484000  |
| O            | 28.827591000 | 23.334868000 | 26.880917000 | O  | 30.426936000 | 15.387151000 | 13.440421000  |
| O            | 25.849012000 | 12.408579000 | 14.472325000 | O  | 30.426946000 | 13.440483000 | 11.493756000  |
| O            | 25.848911000 | 14.472433000 | 14.472432000 | O  | 30.426933000 | 13.440426000 | 15.387152000  |
| O            | 24.934197000 | 13.440504000 | 16.986469000 | O  | 24.934210000 | 13.440425000 | 9.894409000   |
| O            | 26.880944000 | 11.493774000 | 16.986500000 | O  | 26.880879000 | 11.493760000 | 9.894408000   |
| O            | 27.912892000 | 12.408463000 | 14.472437000 | O  | 26.880889000 | 15.387147000 | 9.894411000   |
| O            | 27.912782000 | 14.472319000 | 14.472318000 | O  | 28.827596000 | 13.440487000 | 9.894406000   |
| O            | 28.827591000 | 13.440433000 | 16.986482000 | C  | 23.753697000 | 27.066116000 | 30.007949000  |
| O            | 25.849015000 | 14.472322000 | 12.408582000 | C  | 23.753135000 | 30.008630000 | 27.063604000  |



| Journal Name |              |              |              | ARTICLE |              |              |              |
|--------------|--------------|--------------|--------------|---------|--------------|--------------|--------------|
| C            | 26.696398000 | 30.008246000 | 30.008106000 | C       | 20.687003000 | 19.634347000 | 13.440450000 |
| C            | 30.007968000 | 30.008237000 | 26.695581000 | O       | 13.440450000 | 24.934185000 | 9.894590000  |
| C            | 30.008286000 | 26.697416000 | 30.008420000 | C       | 13.440450000 | 23.727502000 | 10.287052000 |
| C            | 23.753697000 | 10.313401000 | 13.255234000 | O       | 13.440450000 | 24.934185000 | 16.986310000 |
| C            | 23.753135000 | 13.257746000 | 10.312720000 | C       | 13.440450000 | 23.727502000 | 16.593848000 |
| C            | 26.696398000 | 10.313244000 | 10.313104000 | O       | 13.440450000 | 23.335040000 | 15.387165000 |
| C            | 30.008286000 | 10.312930000 | 13.623934000 | O       | 13.440450000 | 23.335040000 | 11.493735000 |
| C            | 30.007968000 | 13.625768000 | 10.313113000 | C       | 18.960712000 | 26.559942000 | 17.333342000 |
| H            | 27.351814000 | 30.759513000 | 23.002127000 | C       | 19.936757000 | 26.544889000 | 18.317452000 |
| H            | 30.758179000 | 27.358190000 | 23.003211000 | H       | 19.144577000 | 26.397044000 | 16.322082000 |
| H            | 23.008991000 | 23.009158000 | 26.377462000 | H       | 20.830009000 | 26.284144000 | 18.007515000 |
| H            | 27.355985000 | 23.003402000 | 30.758391000 | C       | 21.360638000 | 17.333342000 | 13.119492000 |
| H            | 30.757581000 | 23.004153000 | 27.359935000 | C       | 20.384593000 | 18.317452000 | 13.104439000 |
| H            | 23.008991000 | 13.943888000 | 17.312192000 | H       | 21.176773000 | 16.322082000 | 12.956594000 |
| H            | 27.355985000 | 9.562959000  | 17.317948000 | H       | 19.491341000 | 18.007515000 | 12.843694000 |
| H            | 30.757582000 | 12.961415000 | 17.317197000 | C       | 22.988008000 | 18.960712000 | 13.761408000 |
| H            | 27.351814000 | 17.319223000 | 9.561837000  | C       | 22.003898000 | 19.936757000 | 13.776461000 |
| H            | 30.758179000 | 17.318139000 | 12.963160000 | H       | 23.999268000 | 19.144577000 | 13.924306000 |
| H            | 23.003255000 | 27.356162000 | 30.758555000 | H       | 22.313835000 | 20.830009000 | 14.037206000 |
| H            | 23.001913000 | 30.759916000 | 27.349810000 | Zr      | 10.956924000 | 26.880900000 | 13.440450000 |
| H            | 26.407446000 | 30.758917000 | 30.758911000 | O       | 9.894590000  | 26.880900000 | 11.493735000 |
| H            | 30.758582000 | 30.758568000 | 26.405278000 | O       | 12.408223000 | 27.913127000 | 14.472677000 |
| H            | 30.759373000 | 26.409850000 | 30.759355000 | C       | 10.287052000 | 26.880900000 | 10.287052000 |
| H            | 23.003255000 | 9.562795000  | 12.965188000 | Zr      | 15.923976000 | 26.880900000 | 13.440450000 |
| H            | 23.001913000 | 12.971540000 | 9.561434000  | O       | 16.986310000 | 26.880900000 | 11.493735000 |
| H            | 26.407446000 | 9.562439000  | 9.562434000  | C       | 16.593848000 | 26.880900000 | 10.287052000 |
| H            | 30.759373000 | 9.561995000  | 13.911500000 | O       | 16.986310000 | 26.880900000 | 15.387165000 |
| H            | 30.758582000 | 13.916071000 | 9.562782000  | O       | 14.472677000 | 27.913127000 | 12.408223000 |
| H            | 25.215026000 | 11.776433000 | 15.102845000 | C       | 16.593848000 | 26.880900000 | 16.593848000 |
| H            | 28.544134000 | 11.776251000 | 11.775822000 | C       | 17.650268000 | 26.880900000 | 17.650268000 |
| H            | 28.555271000 | 15.099035000 | 15.098322000 | C       | 19.634347000 | 26.880900000 | 19.634347000 |
| H            | 25.215244000 | 15.103495000 | 11.776660000 | O       | 9.894590000  | 26.880900000 | 15.387165000 |
| H            | 25.215244000 | 28.544690000 | 25.217855000 | C       | 10.287052000 | 26.880900000 | 16.593848000 |
| H            | 28.555271000 | 25.223028000 | 25.222315000 | Zr      | 13.440450000 | 26.880900000 | 15.923976000 |
| H            | 28.544134000 | 28.545528000 | 28.545099000 | O       | 11.493735000 | 26.880900000 | 16.986310000 |
| H            | 25.215026000 | 25.218505000 | 28.544917000 | O       | 14.472677000 | 27.913127000 | 14.472677000 |
| O            | 14.472677000 | 25.848673000 | 14.472677000 | Zr      | 13.440450000 | 26.880900000 | 10.956924000 |
| O            | 12.408223000 | 25.848673000 | 12.408223000 | O       | 11.493735000 | 26.880900000 | 9.894590000  |
| O            | 14.472677000 | 25.848673000 | 12.408223000 | O       | 15.387165000 | 26.880900000 | 9.894590000  |
| O            | 12.408223000 | 25.848673000 | 14.472677000 | O       | 12.408223000 | 27.913127000 | 12.408223000 |
| Zr           | 13.440450000 | 24.397374000 | 13.440450000 | O       | 15.387165000 | 26.880900000 | 16.986310000 |
| O            | 11.493735000 | 23.335040000 | 13.440450000 | Zr      | 13.440450000 | 29.364426000 | 13.440450000 |
| C            | 10.287052000 | 23.727502000 | 13.440450000 | O       | 11.493735000 | 30.426760000 | 13.440450000 |
| O            | 15.387165000 | 23.335040000 | 13.440450000 | C       | 10.287052000 | 30.034298000 | 13.440450000 |
| C            | 16.593848000 | 23.727502000 | 13.440450000 | O       | 15.387165000 | 30.426760000 | 13.440450000 |
| C            | 17.650268000 | 22.671082000 | 13.440450000 | C       | 16.593848000 | 30.034298000 | 13.440450000 |
| C            | 19.634347000 | 20.687003000 | 13.440450000 | O       | 16.986310000 | 28.827615000 | 13.440450000 |
| C            | 18.960712000 | 22.988008000 | 13.761408000 | O       | 9.894590000  | 28.827615000 | 13.440450000 |
| C            | 19.936757000 | 22.003898000 | 13.776461000 | C       | 22.671082000 | 26.880900000 | 22.671082000 |
| H            | 19.144577000 | 23.999268000 | 13.924306000 | C       | 20.687003000 | 26.880900000 | 20.687003000 |
| H            | 20.830009000 | 22.313835000 | 14.037206000 | C       | 21.360638000 | 27.201858000 | 22.988008000 |
| O            | 9.894590000  | 24.934185000 | 13.440450000 | C       | 20.384593000 | 27.216911000 | 22.003898000 |
| O            | 16.986310000 | 24.934185000 | 13.440450000 | H       | 21.176773000 | 27.364756000 | 23.999268000 |
| C            | 17.333342000 | 21.360638000 | 13.119492000 | H       | 19.491341000 | 27.477656000 | 22.313835000 |
| C            | 18.317452000 | 20.384593000 | 13.104439000 | O       | 13.440450000 | 28.827615000 | 16.986310000 |
| H            | 16.322082000 | 21.176773000 | 12.956594000 | C       | 13.440450000 | 30.034298000 | 16.593848000 |
| H            | 18.007515000 | 19.491341000 | 12.843694000 | O       | 13.440450000 | 28.827615000 | 9.894590000  |
| C            | 22.988008000 | 26.559942000 | 21.360638000 | C       | 13.440450000 | 30.034298000 | 10.287052000 |
| C            | 22.003898000 | 26.544889000 | 20.384593000 | O       | 13.440450000 | 30.426760000 | 15.387165000 |
| H            | 23.999268000 | 26.397044000 | 21.176773000 | O       | 13.440450000 | 30.426760000 | 11.493735000 |
| H            | 22.313835000 | 26.284144000 | 19.491341000 | C       | 17.333342000 | 27.201858000 | 18.960712000 |
| C            | 22.671082000 | 17.650268000 | 13.440450000 | C       | 18.317452000 | 27.216911000 | 19.936757000 |

## ARTICLE

## Journal Name

|                  |              |              |              |    |              |              |              |
|------------------|--------------|--------------|--------------|----|--------------|--------------|--------------|
| H                | 16.322082000 | 27.364756000 | 19.144577000 | O  | 24.934197000 | 23.334881000 | 26.880846000 |
| H                | 18.007515000 | 27.477656000 | 20.830009000 | O  | 25.849012000 | 25.849025000 | 27.912771000 |
| H                | 13.440450000 | 30.790903000 | 9.530447000  | O  | 27.912892000 | 25.848913000 | 27.912887000 |
| H                | 17.350453000 | 26.880900000 | 9.530447000  | O  | 26.880944000 | 23.334850000 | 28.827576000 |
| H                | 17.350453000 | 30.790903000 | 13.440450000 | O  | 28.827591000 | 23.334868000 | 26.880917000 |
| H                | 13.440450000 | 30.790903000 | 17.350453000 | O  | 25.849012000 | 12.408579000 | 14.472325000 |
| H                | 9.530447000  | 30.790903000 | 13.440450000 | O  | 25.848911000 | 14.472433000 | 14.472432000 |
| H                | 9.530447000  | 26.880900000 | 17.350453000 | O  | 24.934197000 | 13.440504000 | 16.986469000 |
| H                | 13.440450000 | 22.970897000 | 9.530447000  | O  | 26.880944000 | 11.493774000 | 16.986500000 |
| H                | 9.530447000  | 22.970897000 | 13.440450000 | O  | 27.912892000 | 12.408463000 | 14.472437000 |
| H                | 13.440450000 | 22.970897000 | 17.350453000 | O  | 27.912782000 | 14.472319000 | 14.472318000 |
| H                | 15.026933000 | 25.294417000 | 11.853967000 | O  | 28.827591000 | 13.440433000 | 16.986482000 |
| H                | 11.853967000 | 28.467383000 | 11.853967000 | O  | 25.849015000 | 14.472322000 | 12.408582000 |
| H                | 9.530447000  | 26.880900000 | 9.530447000  | O  | 24.934203000 | 16.986468000 | 13.440501000 |
| H                | 15.026933000 | 28.467383000 | 15.026933000 | O  | 27.912889000 | 14.472431000 | 12.408464000 |
| H                | 11.853967000 | 25.294417000 | 15.026933000 | O  | 26.880945000 | 16.986494000 | 11.493769000 |
| H                | 26.759894000 | 23.875048000 | 20.921326000 | O  | 28.827591000 | 16.986480000 | 13.440428000 |
| H                | 26.221498000 | 19.343203000 | 16.473871000 | C  | 23.755332000 | 26.686089000 | 23.755213000 |
| H                | 26.516072000 | 19.247657000 | 22.482829000 | Zr | 24.236612000 | 26.881475000 | 26.880552000 |
| H                | 27.221273000 | 17.912869000 | 21.037746000 | Zr | 26.880671000 | 29.524609000 | 26.880680000 |
| H                | 26.593979000 | 21.068587000 | 24.160886000 | Zr | 29.524440000 | 26.882357000 | 26.881381000 |
| H                | 27.206286000 | 16.213652000 | 19.234360000 | C  | 27.064326000 | 30.008530000 | 23.753165000 |
| Cu               | 25.509789000 | 21.749682000 | 18.245533000 | C  | 30.008123000 | 27.066993000 | 23.753823000 |
| Br               | 23.490342000 | 21.306729000 | 19.444586000 | C  | 23.755714000 | 23.756676000 | 26.684338000 |
| C                | 25.224744000 | 23.516198000 | 17.447110000 | Zr | 26.880615000 | 26.881402000 | 29.524137000 |
| C                | 26.271472000 | 23.036464000 | 16.952881000 | C  | 27.065914000 | 23.754135000 | 30.008060000 |
| H                | 27.165025000 | 23.000509000 | 16.359587000 | C  | 30.007964000 | 23.754748000 | 27.067567000 |
| C                | 24.072493000 | 24.372614000 | 17.777526000 | Zr | 24.236612000 | 13.440798000 | 13.439875000 |
| H                | 24.128496000 | 24.641090000 | 18.837473000 | Zr | 26.880615000 | 10.797213000 | 13.439948000 |
| H                | 23.150001000 | 23.781948000 | 17.673200000 | C  | 23.755714000 | 13.637012000 | 16.564674000 |
| O                | 24.048667000 | 25.580730000 | 17.046969000 | C  | 27.065914000 | 10.313290000 | 16.567215000 |
| H                | 23.891816000 | 25.352180000 | 16.125731000 | Zr | 29.524440000 | 13.439969000 | 13.438993000 |
| <b>c. PA/DBU</b> |              |              |              | C  | 30.007964000 | 13.253783000 | 16.566602000 |
| N                | 27.029739000 | 21.817472000 | 20.447336000 | Zr | 26.880671000 | 13.440670000 | 10.796741000 |
| N                | 26.806249000 | 19.930819000 | 18.460742000 | C  | 23.755332000 | 16.566137000 | 13.635261000 |
| C                | 26.669204000 | 20.572713000 | 20.816333000 | C  | 27.064326000 | 16.568185000 | 10.312820000 |
| C                | 27.017215000 | 22.808219000 | 21.345898000 | C  | 30.008123000 | 16.567527000 | 13.254357000 |
| C                | 26.812689000 | 19.011294000 | 17.477095000 | O  | 23.334855000 | 26.880866000 | 23.934215000 |
| C                | 26.674149000 | 19.526425000 | 19.752061000 | O  | 23.334856000 | 24.934212000 | 26.880862000 |
| C                | 26.304006000 | 20.308518000 | 22.144914000 | O  | 25.848909000 | 27.912895000 | 27.912897000 |
| C                | 26.703878000 | 22.629893000 | 22.700670000 | O  | 23.334862000 | 26.880939000 | 28.827594000 |
| C                | 26.712771000 | 17.628223000 | 17.691048000 | O  | 23.334864000 | 28.827596000 | 26.880937000 |
| C                | 26.558251000 | 18.160930000 | 20.043712000 | O  | 24.934210000 | 30.426941000 | 26.880925000 |
| C                | 26.345355000 | 21.330519000 | 23.085180000 | O  | 26.880889000 | 30.426939000 | 24.934203000 |
| C                | 26.584356000 | 17.219026000 | 19.025204000 | O  | 26.880879000 | 30.426942000 | 28.827590000 |
| C                | 26.809925000 | 23.730886000 | 23.728973000 | O  | 27.912786000 | 27.912776000 | 27.912777000 |
| C                | 26.809925000 | 16.592377000 | 16.590464000 | O  | 28.827596000 | 30.426944000 | 26.880863000 |
| O                | 26.880885000 | 24.934153000 | 23.334955000 | O  | 30.426933000 | 24.934198000 | 26.880924000 |
| O                | 26.880903000 | 23.334945000 | 24.934136000 | O  | 30.426936000 | 26.880929000 | 24.934199000 |
| O                | 26.880903000 | 15.387214000 | 16.986405000 | O  | 30.426944000 | 26.880866000 | 28.827595000 |
| O                | 26.880885000 | 16.986395000 | 15.387197000 | O  | 30.426946000 | 28.827594000 | 26.880867000 |
| Zr               | 26.878142000 | 26.881612000 | 24.237883000 | O  | 24.934211000 | 26.880924000 | 30.426942000 |
| Zr               | 26.878209000 | 24.239690000 | 26.880717000 | O  | 26.880889000 | 24.934201000 | 30.426937000 |
| Zr               | 26.878209000 | 13.440633000 | 16.081660000 | O  | 26.880878000 | 28.827589000 | 30.426943000 |
| Zr               | 26.878142000 | 16.083467000 | 13.439738000 | O  | 28.827598000 | 26.880862000 | 30.426940000 |
| O                | 24.934203000 | 26.880849000 | 23.334882000 | O  | 25.848909000 | 12.408453000 | 12.408455000 |
| O                | 25.848911000 | 25.848918000 | 25.848917000 | O  | 23.334862000 | 11.493756000 | 13.440411000 |
| O                | 25.849015000 | 27.912768000 | 25.849028000 | O  | 23.334855000 | 15.387135000 | 13.440484000 |
| O                | 27.912782000 | 25.849032000 | 25.849031000 | O  | 23.334864000 | 13.440413000 | 11.493754000 |
| O                | 27.912889000 | 27.912886000 | 25.848919000 | O  | 23.334856000 | 13.440488000 | 15.387138000 |
| O                | 26.880945000 | 28.827581000 | 23.334856000 | O  | 24.934211000 | 9.894408000  | 13.440426000 |
| O                | 28.827591000 | 26.880922000 | 23.334870000 | O  | 26.880889000 | 9.894413000  | 15.387149000 |

| Journal Name | ARTICLE      |              |              |    |              |              |              |
|--------------|--------------|--------------|--------------|----|--------------|--------------|--------------|
| O            | 27.912786000 | 12.408573000 | 12.408574000 | H  | 19.144577000 | 23.999268000 | 13.924306000 |
| O            | 26.880878000 | 9.894407000  | 11.493761000 | H  | 20.830009000 | 22.313835000 | 14.037206000 |
| O            | 28.827598000 | 9.894410000  | 13.440488000 | O  | 9.894590000  | 24.934185000 | 13.440450000 |
| O            | 30.426944000 | 11.493755000 | 13.440484000 | O  | 16.986310000 | 24.934185000 | 13.440450000 |
| O            | 30.426936000 | 15.387151000 | 13.440421000 | C  | 17.333342000 | 21.360638000 | 13.119492000 |
| O            | 30.426946000 | 13.440483000 | 11.493756000 | C  | 18.317452000 | 20.384593000 | 13.104439000 |
| O            | 30.426933000 | 13.440426000 | 15.387152000 | H  | 16.322082000 | 21.176773000 | 12.956594000 |
| O            | 24.934210000 | 13.440425000 | 9.894409000  | H  | 18.007515000 | 19.491341000 | 12.843694000 |
| O            | 26.880879000 | 11.493760000 | 9.894408000  | C  | 22.988008000 | 26.559942000 | 21.360638000 |
| O            | 26.880889000 | 15.387147000 | 9.894411000  | C  | 22.003898000 | 26.544889000 | 20.384593000 |
| O            | 28.827596000 | 13.440487000 | 9.894406000  | H  | 23.999268000 | 26.397044000 | 21.176773000 |
| C            | 23.753697000 | 27.066116000 | 30.007949000 | H  | 22.313835000 | 26.284144000 | 19.491341000 |
| C            | 23.753135000 | 30.008630000 | 27.063604000 | C  | 22.671082000 | 17.650268000 | 13.440450000 |
| C            | 26.696398000 | 30.008246000 | 30.008106000 | C  | 20.687003000 | 19.634347000 | 13.440450000 |
| C            | 30.007968000 | 30.008237000 | 26.695581000 | O  | 13.440450000 | 24.934185000 | 9.894590000  |
| C            | 30.008286000 | 26.697416000 | 30.008420000 | C  | 13.440450000 | 23.727502000 | 10.287052000 |
| C            | 23.753697000 | 10.313401000 | 13.255234000 | O  | 13.440450000 | 24.934185000 | 16.986310000 |
| C            | 23.753135000 | 13.257746000 | 10.312720000 | C  | 13.440450000 | 23.727502000 | 16.593848000 |
| C            | 26.696398000 | 10.313244000 | 10.313104000 | O  | 13.440450000 | 23.335040000 | 15.387165000 |
| C            | 30.008286000 | 10.312930000 | 13.623934000 | O  | 13.440450000 | 23.335040000 | 11.493735000 |
| C            | 30.007968000 | 13.625768000 | 10.313113000 | C  | 18.960712000 | 26.559942000 | 17.333342000 |
| H            | 27.351814000 | 30.759513000 | 23.002127000 | C  | 19.936757000 | 26.544889000 | 18.317452000 |
| H            | 30.758179000 | 27.358190000 | 23.003211000 | H  | 19.144577000 | 26.397044000 | 16.322082000 |
| H            | 23.008991000 | 23.009158000 | 26.377462000 | H  | 20.830009000 | 26.284144000 | 18.007515000 |
| H            | 27.355985000 | 23.003402000 | 30.758391000 | C  | 21.360638000 | 17.333342000 | 13.119492000 |
| H            | 30.757581000 | 23.004153000 | 27.359935000 | C  | 20.384593000 | 18.317452000 | 13.104439000 |
| H            | 23.008991000 | 13.943888000 | 17.312192000 | H  | 21.176773000 | 16.322082000 | 12.956594000 |
| H            | 27.355985000 | 9.562959000  | 17.317948000 | H  | 19.491341000 | 18.007515000 | 12.843694000 |
| H            | 30.757582000 | 12.961415000 | 17.317197000 | C  | 22.988008000 | 18.960712000 | 13.761408000 |
| H            | 27.351814000 | 17.319223000 | 9.561837000  | C  | 22.003898000 | 19.936757000 | 13.776461000 |
| H            | 30.758179000 | 17.318139000 | 12.963160000 | H  | 23.999268000 | 19.144577000 | 13.924306000 |
| H            | 23.003255000 | 27.356162000 | 30.758555000 | H  | 22.313835000 | 20.830009000 | 14.037206000 |
| H            | 23.001913000 | 30.759916000 | 27.349810000 | Zr | 10.956924000 | 26.880900000 | 13.440450000 |
| H            | 26.407446000 | 30.758917000 | 30.758911000 | O  | 9.894590000  | 26.880900000 | 11.493735000 |
| H            | 30.758582000 | 30.758568000 | 26.405278000 | O  | 12.408223000 | 27.913127000 | 14.472677000 |
| H            | 30.759373000 | 26.409850000 | 30.759355000 | C  | 10.287052000 | 26.880900000 | 10.287052000 |
| H            | 23.003255000 | 9.562795000  | 12.965188000 | Zr | 15.923976000 | 26.880900000 | 13.440450000 |
| H            | 23.001913000 | 12.971540000 | 9.561434000  | O  | 16.986310000 | 26.880900000 | 11.493735000 |
| H            | 26.407446000 | 9.562439000  | 9.562434000  | C  | 16.593848000 | 26.880900000 | 10.287052000 |
| H            | 30.759373000 | 9.561995000  | 13.911500000 | O  | 16.986310000 | 26.880900000 | 15.387165000 |
| H            | 30.758582000 | 13.916071000 | 9.562782000  | O  | 14.472677000 | 27.913127000 | 12.408223000 |
| H            | 25.215026000 | 11.776433000 | 15.102845000 | C  | 16.593848000 | 26.880900000 | 16.593848000 |
| H            | 28.544134000 | 11.776251000 | 11.775822000 | C  | 17.650268000 | 26.880900000 | 17.650268000 |
| H            | 28.555271000 | 15.099035000 | 15.098322000 | C  | 19.634347000 | 26.880900000 | 19.634347000 |
| H            | 25.215244000 | 15.103495000 | 11.776660000 | O  | 9.894590000  | 26.880900000 | 15.387165000 |
| H            | 25.215244000 | 28.544690000 | 25.217855000 | C  | 10.287052000 | 26.880900000 | 16.593848000 |
| H            | 28.555271000 | 25.223028000 | 25.222315000 | Zr | 13.440450000 | 26.880900000 | 15.923976000 |
| H            | 28.544134000 | 28.545528000 | 28.545099000 | O  | 11.493735000 | 26.880900000 | 16.986310000 |
| H            | 25.215026000 | 25.218505000 | 28.544917000 | O  | 14.472677000 | 27.913127000 | 14.472677000 |
| O            | 14.472677000 | 25.848673000 | 14.472677000 | Zr | 13.440450000 | 26.880900000 | 10.956924000 |
| O            | 12.408223000 | 25.848673000 | 12.408223000 | O  | 11.493735000 | 26.880900000 | 9.894590000  |
| O            | 14.472677000 | 25.848673000 | 12.408223000 | O  | 15.387165000 | 26.880900000 | 9.894590000  |
| O            | 12.408223000 | 25.848673000 | 14.472677000 | O  | 12.408223000 | 27.913127000 | 12.408223000 |
| Zr           | 13.440450000 | 24.397374000 | 13.440450000 | O  | 15.387165000 | 26.880900000 | 16.986310000 |
| O            | 11.493735000 | 23.335040000 | 13.440450000 | Zr | 13.440450000 | 29.364426000 | 13.440450000 |
| C            | 10.287052000 | 23.727502000 | 13.440450000 | O  | 11.493735000 | 30.426760000 | 13.440450000 |
| O            | 15.387165000 | 23.335040000 | 13.440450000 | C  | 10.287052000 | 30.034298000 | 13.440450000 |
| C            | 16.593848000 | 23.727502000 | 13.440450000 | O  | 15.387165000 | 30.426760000 | 13.440450000 |
| C            | 17.650268000 | 22.671082000 | 13.440450000 | C  | 16.593848000 | 30.034298000 | 13.440450000 |
| C            | 19.634347000 | 20.687003000 | 13.440450000 | O  | 16.986310000 | 28.827615000 | 13.440450000 |
| C            | 18.960712000 | 22.988008000 | 13.761408000 | O  | 9.894590000  | 28.827615000 | 13.440450000 |
| C            | 19.936757000 | 22.003898000 | 13.776461000 | C  | 22.671082000 | 26.880900000 | 22.671082000 |

## ARTICLE

## Journal Name

|    |              |              |              |                                 |              |              |              |
|----|--------------|--------------|--------------|---------------------------------|--------------|--------------|--------------|
| C  | 20.687003000 | 26.880900000 | 20.687003000 | H                               | 24.054667000 | 22.535431000 | 13.664766000 |
| C  | 21.360638000 | 27.201858000 | 22.988008000 | H                               | 26.436390000 | 23.909462000 | 13.169253000 |
| C  | 20.384593000 | 27.216911000 | 22.003898000 | H                               | 22.859863000 | 27.163153000 | 16.629053000 |
| H  | 21.176773000 | 27.364756000 | 23.999268000 | H                               | 24.016937000 | 27.924366000 | 15.563445000 |
| H  | 19.491341000 | 27.477656000 | 22.313835000 | H                               | 26.224473000 | 21.571391000 | 14.036243000 |
| O  | 13.440450000 | 28.827615000 | 16.986310000 | H                               | 26.296170000 | 22.195065000 | 15.693961000 |
| C  | 13.440450000 | 30.034298000 | 16.593848000 | H                               | 25.608557000 | 26.613307000 | 16.550832000 |
| O  | 13.440450000 | 28.827615000 | 9.894590000  | H                               | 24.406353000 | 25.600965000 | 17.333460000 |
| C  | 13.440450000 | 30.034298000 | 10.287052000 | H                               | 22.812066000 | 24.458504000 | 16.754021000 |
| O  | 13.440450000 | 30.426760000 | 15.387165000 | H                               | 22.287069000 | 23.177551000 | 15.704924000 |
| O  | 13.440450000 | 30.426760000 | 11.493735000 | <b>d. PA/DBU/CO<sub>2</sub></b> |              |              |              |
| C  | 17.333342000 | 27.201858000 | 18.960712000 | N                               | 27.040767000 | 21.812901000 | 20.452588000 |
| C  | 18.317452000 | 27.216911000 | 19.936757000 | N                               | 26.820609000 | 19.927391000 | 18.464578000 |
| H  | 16.322082000 | 27.364756000 | 19.144577000 | C                               | 26.676229000 | 20.568850000 | 20.820429000 |
| H  | 18.007515000 | 27.477656000 | 20.830009000 | C                               | 27.026946000 | 22.804490000 | 21.350005000 |
| H  | 13.440450000 | 30.790903000 | 9.530447000  | C                               | 26.823982000 | 19.009446000 | 17.479743000 |
| H  | 17.350453000 | 26.880900000 | 9.530447000  | C                               | 26.680624000 | 19.523066000 | 19.755383000 |
| H  | 17.350453000 | 30.790903000 | 13.440450000 | C                               | 26.306107000 | 20.306420000 | 22.147805000 |
| H  | 13.440450000 | 30.790903000 | 17.350453000 | C                               | 26.705779000 | 22.628237000 | 22.702649000 |
| H  | 9.530447000  | 30.790903000 | 13.440450000 | C                               | 26.714516000 | 17.627080000 | 17.691877000 |
| H  | 9.530447000  | 26.880900000 | 17.350453000 | C                               | 26.554883000 | 18.158114000 | 20.044740000 |
| H  | 13.440450000 | 22.970897000 | 9.530447000  | C                               | 26.344123000 | 21.329757000 | 23.087029000 |
| H  | 9.530447000  | 22.970897000 | 13.440450000 | C                               | 26.579111000 | 17.217271000 | 19.025122000 |
| H  | 13.440450000 | 22.970897000 | 17.350453000 | C                               | 26.809925000 | 23.730886000 | 23.728973000 |
| H  | 15.026933000 | 25.294417000 | 11.853967000 | C                               | 26.809925000 | 16.592377000 | 16.590464000 |
| H  | 11.853967000 | 28.467383000 | 11.853967000 | O                               | 26.880885000 | 24.934153000 | 23.334955000 |
| H  | 9.530447000  | 26.880900000 | 9.530447000  | O                               | 26.880903000 | 23.334945000 | 24.934136000 |
| H  | 15.026933000 | 28.467383000 | 15.026933000 | O                               | 26.880903000 | 15.387214000 | 16.986405000 |
| H  | 11.853967000 | 25.294417000 | 15.026933000 | O                               | 26.880885000 | 16.986395000 | 15.387197000 |
| H  | 27.288074000 | 23.794373000 | 20.973111000 | Zr                              | 26.878142000 | 26.881612000 | 24.237883000 |
| H  | 26.915800000 | 19.400415000 | 16.466202000 | Zr                              | 26.878209000 | 24.239690000 | 26.880717000 |
| H  | 25.983313000 | 19.317317000 | 22.449713000 | Zr                              | 26.878209000 | 13.440633000 | 16.081660000 |
| H  | 26.473692000 | 17.829707000 | 21.073389000 | Zr                              | 26.878142000 | 16.083467000 | 13.439738000 |
| H  | 26.095351000 | 21.137230000 | 24.123960000 | O                               | 24.934203000 | 26.880849000 | 23.334882000 |
| H  | 26.520484000 | 16.158525000 | 19.246905000 | O                               | 25.848911000 | 25.848918000 | 25.848917000 |
| Cu | 26.932343000 | 21.992269000 | 18.176725000 | O                               | 25.849015000 | 27.912768000 | 25.849028000 |
| Br | 24.619058000 | 22.711229000 | 18.343228000 | O                               | 27.912782000 | 25.849032000 | 25.849031000 |
| C  | 28.053117000 | 23.582232000 | 17.623044000 | O                               | 27.912889000 | 27.912886000 | 25.848919000 |
| C  | 28.631540000 | 22.529862000 | 17.282042000 | O                               | 26.880945000 | 28.827581000 | 23.334856000 |
| H  | 29.391247000 | 21.890547000 | 16.875771000 | O                               | 28.827591000 | 26.880922000 | 23.334870000 |
| C  | 27.654451000 | 24.990232000 | 17.855321000 | O                               | 24.934197000 | 23.334881000 | 26.880846000 |
| H  | 28.097420000 | 25.310486000 | 18.808183000 | O                               | 25.849012000 | 25.849025000 | 27.912771000 |
| H  | 26.560465000 | 25.014766000 | 17.994263000 | O                               | 27.912892000 | 25.848913000 | 27.912887000 |
| O  | 28.106675000 | 25.854014000 | 16.857734000 | O                               | 26.880944000 | 23.334850000 | 28.827576000 |
| H  | 27.559142000 | 25.622496000 | 16.060030000 | O                               | 28.827591000 | 23.334868000 | 26.880917000 |
| C  | 22.832498000 | 26.428879000 | 14.601968000 | O                               | 25.849012000 | 12.408579000 | 14.472325000 |
| C  | 23.578041000 | 26.956210000 | 15.825393000 | O                               | 25.848911000 | 14.472433000 | 14.472432000 |
| C  | 24.699283000 | 26.035120000 | 16.367784000 | O                               | 24.934197000 | 13.440504000 | 16.986469000 |
| C  | 22.013310000 | 25.168047000 | 14.863535000 | O                               | 26.880944000 | 11.493774000 | 16.986500000 |
| C  | 25.103144000 | 24.883345000 | 15.482825000 | O                               | 27.912892000 | 12.408463000 | 14.472437000 |
| C  | 22.780626000 | 24.152692000 | 15.701006000 | O                               | 27.912782000 | 14.472319000 | 14.472318000 |
| N  | 24.135864000 | 23.958423000 | 15.208643000 | O                               | 28.827591000 | 13.440433000 | 16.986482000 |
| H  | 22.179180000 | 27.214083000 | 14.205205000 | O                               | 25.849015000 | 14.472322000 | 12.408582000 |
| H  | 21.718256000 | 24.723703000 | 13.904881000 | O                               | 24.934203000 | 16.986468000 | 13.440501000 |
| C  | 26.681627000 | 23.695555000 | 14.222915000 | O                               | 27.912889000 | 14.472431000 | 12.408464000 |
| N  | 26.327467000 | 24.837410000 | 15.046770000 | O                               | 26.880945000 | 16.986494000 | 11.493769000 |
| C  | 25.973205000 | 22.428547000 | 14.670913000 | O                               | 28.827591000 | 16.986480000 | 13.440428000 |
| C  | 24.476002000 | 22.645359000 | 14.676764000 | C                               | 23.755332000 | 26.686089000 | 23.755213000 |
| H  | 24.002228000 | 21.897663000 | 15.326608000 | Zr                              | 24.236612000 | 26.881475000 | 26.880552000 |
| H  | 27.769745000 | 23.565198000 | 14.266043000 | Zr                              | 26.880671000 | 29.524609000 | 26.880680000 |
| H  | 23.564857000 | 26.221169000 | 13.811010000 | Zr                              | 29.524440000 | 26.882357000 | 26.881381000 |
| H  | 21.084830000 | 25.415524000 | 15.389776000 | C                               | 27.064326000 | 30.008530000 | 23.753165000 |

|    |              |              |              |    |              |              |              |
|----|--------------|--------------|--------------|----|--------------|--------------|--------------|
| C  | 30.008123000 | 27.066993000 | 23.753823000 | H  | 30.758179000 | 27.358190000 | 23.003211000 |
| C  | 23.755714000 | 23.756676000 | 26.684338000 | H  | 23.008991000 | 23.009158000 | 26.377462000 |
| Zr | 26.880615000 | 26.881402000 | 29.524137000 | H  | 27.355985000 | 23.003402000 | 30.758391000 |
| C  | 27.065914000 | 23.754135000 | 30.008060000 | H  | 30.757581000 | 23.004153000 | 27.359935000 |
| C  | 30.007964000 | 23.754748000 | 27.067567000 | H  | 23.008991000 | 13.943888000 | 17.312192000 |
| Zr | 24.236612000 | 13.440798000 | 13.439875000 | H  | 27.355985000 | 9.562959000  | 17.317948000 |
| Zr | 26.880615000 | 10.797213000 | 13.439948000 | H  | 30.757582000 | 12.961415000 | 17.317197000 |
| C  | 23.755714000 | 13.637012000 | 16.564674000 | H  | 27.351814000 | 17.319223000 | 9.561837000  |
| C  | 27.065914000 | 10.313290000 | 16.567215000 | H  | 30.758179000 | 17.318139000 | 12.963160000 |
| Zr | 29.524440000 | 13.439969000 | 13.438993000 | H  | 23.003255000 | 27.356162000 | 30.758555000 |
| C  | 30.007964000 | 13.253783000 | 16.566602000 | H  | 23.001913000 | 30.759916000 | 27.349810000 |
| Zr | 26.880671000 | 13.440670000 | 10.796741000 | H  | 26.407446000 | 30.758917000 | 30.758911000 |
| C  | 23.755332000 | 16.566137000 | 13.635261000 | H  | 30.758582000 | 30.758568000 | 26.405278000 |
| C  | 27.064326000 | 16.568185000 | 10.312820000 | H  | 30.759373000 | 26.409850000 | 30.759355000 |
| C  | 30.008123000 | 16.567527000 | 13.254357000 | H  | 23.003255000 | 9.562795000  | 12.965188000 |
| O  | 23.334855000 | 26.880866000 | 24.934215000 | H  | 23.001913000 | 12.971540000 | 9.561434000  |
| O  | 23.334856000 | 24.934212000 | 26.880862000 | H  | 26.407446000 | 9.562439000  | 9.562434000  |
| O  | 25.848909000 | 27.912895000 | 27.912897000 | H  | 30.759373000 | 9.561995000  | 13.911500000 |
| O  | 23.334862000 | 26.880939000 | 28.827594000 | H  | 30.758582000 | 13.916071000 | 9.562782000  |
| O  | 23.334864000 | 28.827596000 | 26.880937000 | H  | 25.215026000 | 11.776433000 | 15.102845000 |
| O  | 24.934210000 | 30.426941000 | 26.880925000 | H  | 28.544134000 | 11.776251000 | 11.775822000 |
| O  | 26.880889000 | 30.426939000 | 24.934203000 | H  | 28.555271000 | 15.099035000 | 15.098322000 |
| O  | 26.880879000 | 30.426942000 | 28.827590000 | H  | 25.215244000 | 15.103495000 | 11.776660000 |
| O  | 27.912786000 | 27.912776000 | 27.912777000 | H  | 25.215244000 | 28.544690000 | 25.217855000 |
| O  | 28.827596000 | 30.426944000 | 26.880863000 | H  | 28.555271000 | 25.223028000 | 25.222315000 |
| O  | 30.426933000 | 24.934198000 | 26.880924000 | H  | 28.544134000 | 28.545528000 | 28.545099000 |
| O  | 30.426936000 | 26.880929000 | 24.934199000 | H  | 25.215026000 | 25.218505000 | 28.544917000 |
| O  | 30.426944000 | 26.880866000 | 28.827595000 | O  | 14.472677000 | 25.848673000 | 14.472677000 |
| O  | 30.426946000 | 28.827594000 | 26.880867000 | O  | 12.408223000 | 25.848673000 | 12.408223000 |
| O  | 24.934211000 | 26.880924000 | 30.426942000 | O  | 14.472677000 | 25.848673000 | 12.408223000 |
| O  | 26.880889000 | 24.934201000 | 30.426937000 | O  | 12.408223000 | 25.848673000 | 14.472677000 |
| O  | 26.880878000 | 28.827589000 | 30.426943000 | Zr | 13.440450000 | 24.397374000 | 13.440450000 |
| O  | 28.827598000 | 26.880862000 | 30.426940000 | O  | 11.493735000 | 23.335040000 | 13.440450000 |
| O  | 25.848909000 | 12.408453000 | 12.408455000 | C  | 10.287052000 | 23.727502000 | 13.440450000 |
| O  | 23.334862000 | 11.493756000 | 13.440411000 | O  | 15.387165000 | 23.335040000 | 13.440450000 |
| O  | 23.334855000 | 15.387135000 | 13.440484000 | C  | 16.593848000 | 23.727502000 | 13.440450000 |
| O  | 23.334864000 | 13.440413000 | 11.493754000 | C  | 17.650268000 | 22.671082000 | 13.440450000 |
| O  | 23.334856000 | 13.440488000 | 15.387138000 | C  | 19.634347000 | 20.687003000 | 13.440450000 |
| O  | 24.934211000 | 9.894408000  | 13.440426000 | C  | 18.960712000 | 22.988008000 | 13.761408000 |
| O  | 26.880889000 | 9.894413000  | 15.387149000 | C  | 19.936757000 | 22.003898000 | 13.776461000 |
| O  | 27.912786000 | 12.408573000 | 12.408574000 | H  | 19.144577000 | 23.999268000 | 13.924306000 |
| O  | 26.880878000 | 9.894407000  | 11.493761000 | H  | 20.830009000 | 22.313835000 | 14.037206000 |
| O  | 28.827598000 | 9.894410000  | 13.440488000 | O  | 9.894590000  | 24.934185000 | 13.440450000 |
| O  | 30.426944000 | 11.493755000 | 13.440484000 | O  | 16.986310000 | 24.934185000 | 13.440450000 |
| O  | 30.426936000 | 15.387151000 | 13.440421000 | C  | 17.333342000 | 21.360638000 | 13.119492000 |
| O  | 30.426946000 | 13.440483000 | 11.493756000 | C  | 18.317452000 | 20.384593000 | 13.104439000 |
| O  | 30.426933000 | 13.440426000 | 15.387152000 | H  | 16.322082000 | 21.176773000 | 12.956594000 |
| O  | 24.934210000 | 13.440425000 | 9.894409000  | H  | 18.007515000 | 19.491341000 | 12.843694000 |
| O  | 26.880879000 | 11.493760000 | 9.894408000  | C  | 22.988008000 | 26.559942000 | 21.360638000 |
| O  | 26.880889000 | 15.387147000 | 9.894411000  | C  | 22.003898000 | 26.544889000 | 20.384593000 |
| O  | 28.827596000 | 13.440487000 | 9.894406000  | H  | 23.999268000 | 26.397044000 | 21.176773000 |
| C  | 23.753697000 | 27.066116000 | 30.007949000 | H  | 22.313835000 | 26.284144000 | 19.491341000 |
| C  | 23.753135000 | 30.008630000 | 27.063604000 | C  | 22.671082000 | 17.650268000 | 13.440450000 |
| C  | 26.696398000 | 30.008246000 | 30.008106000 | C  | 20.687003000 | 19.634347000 | 13.440450000 |
| C  | 30.007968000 | 30.008237000 | 26.695581000 | O  | 13.440450000 | 24.934185000 | 9.894590000  |
| C  | 30.008286000 | 26.697416000 | 30.008420000 | C  | 13.440450000 | 23.727502000 | 10.287052000 |
| C  | 23.753697000 | 10.313401000 | 13.255234000 | O  | 13.440450000 | 24.934185000 | 16.986310000 |
| C  | 23.753135000 | 13.257746000 | 10.312720000 | C  | 13.440450000 | 23.727502000 | 16.593848000 |
| C  | 26.696398000 | 10.313244000 | 10.313104000 | O  | 13.440450000 | 23.335040000 | 15.387165000 |
| C  | 30.008286000 | 10.312930000 | 13.623934000 | O  | 13.440450000 | 23.335040000 | 11.493735000 |
| C  | 30.007968000 | 13.625768000 | 10.313113000 | C  | 18.960712000 | 26.559942000 | 17.333342000 |
| H  | 27.351814000 | 30.759513000 | 23.002127000 | C  | 19.936757000 | 26.544889000 | 18.317452000 |

## ARTICLE

## Journal Name

|    |              |              |              |               |              |              |              |
|----|--------------|--------------|--------------|---------------|--------------|--------------|--------------|
| H  | 19.144577000 | 26.397044000 | 16.322082000 | H             | 9.530447000  | 22.970897000 | 13.440450000 |
| H  | 20.830009000 | 26.284144000 | 18.007515000 | H             | 13.440450000 | 22.970897000 | 17.350453000 |
| C  | 21.360638000 | 17.333342000 | 13.119492000 | H             | 15.026933000 | 25.294417000 | 11.853967000 |
| C  | 20.384593000 | 18.317452000 | 13.104439000 | H             | 11.853967000 | 28.467383000 | 11.853967000 |
| H  | 21.176773000 | 16.322082000 | 12.956594000 | H             | 9.530447000  | 26.880900000 | 9.530447000  |
| H  | 19.491341000 | 18.007515000 | 12.843694000 | H             | 15.026933000 | 28.467383000 | 15.026933000 |
| C  | 22.988008000 | 18.960712000 | 13.761408000 | H             | 11.853967000 | 25.294417000 | 15.026933000 |
| C  | 22.003898000 | 19.936757000 | 13.776461000 | H             | 27.302981000 | 23.790136000 | 20.979638000 |
| H  | 23.999268000 | 19.144577000 | 13.924306000 | H             | 26.932405000 | 19.398980000 | 16.469630000 |
| H  | 22.313835000 | 20.830009000 | 14.037206000 | H             | 25.983790000 | 19.315801000 | 22.452758000 |
| Zr | 10.956924000 | 26.880900000 | 13.440450000 | H             | 26.463252000 | 17.826194000 | 21.073571000 |
| O  | 9.894590000  | 26.880900000 | 11.493735000 | H             | 26.089370000 | 21.137934000 | 24.124920000 |
| O  | 12.408223000 | 27.913127000 | 14.472677000 | H             | 26.507853000 | 16.156970000 | 19.245461000 |
| C  | 10.287052000 | 26.880900000 | 10.287052000 | Cu            | 26.928268000 | 21.985433000 | 18.192015000 |
| Zr | 15.923976000 | 26.880900000 | 13.440450000 | Br            | 24.592483000 | 22.642639000 | 18.375525000 |
| O  | 16.986310000 | 26.880900000 | 11.493735000 | C             | 28.014551000 | 23.616018000 | 17.691466000 |
| C  | 16.593848000 | 26.880900000 | 10.287052000 | C             | 28.608473000 | 22.592242000 | 17.297016000 |
| O  | 16.986310000 | 26.880900000 | 15.387165000 | H             | 29.374018000 | 21.986688000 | 16.852036000 |
| O  | 14.472677000 | 27.913127000 | 12.408223000 | C             | 27.579316000 | 24.988444000 | 18.023642000 |
| C  | 16.593848000 | 26.880900000 | 16.593848000 | H             | 28.029688000 | 25.266684000 | 18.985067000 |
| C  | 17.650268000 | 26.880900000 | 17.650268000 | H             | 26.486741000 | 24.972669000 | 18.180190000 |
| C  | 19.634347000 | 26.880900000 | 19.634347000 | O             | 27.982903000 | 25.938044000 | 17.076603000 |
| O  | 9.894590000  | 26.880900000 | 15.387165000 | H             | 27.471126000 | 25.701068000 | 16.253374000 |
| C  | 10.287052000 | 26.880900000 | 16.593848000 | C             | 22.821906000 | 26.430584000 | 14.704285000 |
| Zr | 13.440450000 | 26.880900000 | 15.923976000 | C             | 23.541676000 | 26.936736000 | 15.951973000 |
| O  | 11.493735000 | 26.880900000 | 16.986310000 | C             | 24.633490000 | 25.994862000 | 16.514663000 |
| O  | 14.472677000 | 27.913127000 | 14.472677000 | C             | 22.004949000 | 25.158430000 | 14.915845000 |
| Zr | 13.440450000 | 26.880900000 | 10.956924000 | C             | 25.077880000 | 24.878190000 | 15.606405000 |
| O  | 11.493735000 | 26.880900000 | 9.894590000  | C             | 22.760712000 | 24.119243000 | 15.734969000 |
| O  | 15.387165000 | 26.880900000 | 9.894590000  | N             | 24.129746000 | 23.954685000 | 15.270836000 |
| O  | 12.408223000 | 27.913127000 | 12.408223000 | H             | 22.172272000 | 27.220919000 | 14.311779000 |
| O  | 15.387165000 | 26.880900000 | 16.986310000 | H             | 21.728781000 | 24.742310000 | 13.938969000 |
| Zr | 13.440450000 | 29.364426000 | 13.440450000 | C             | 26.701662000 | 23.759899000 | 14.341655000 |
| O  | 11.493735000 | 30.426760000 | 13.440450000 | N             | 26.314769000 | 24.862273000 | 15.203695000 |
| C  | 10.287052000 | 30.034298000 | 13.440450000 | C             | 25.996759000 | 22.467174000 | 14.717045000 |
| O  | 15.387165000 | 30.426760000 | 13.440450000 | C             | 24.496682000 | 22.665213000 | 14.701068000 |
| C  | 16.593848000 | 30.034298000 | 13.440450000 | H             | 24.021019000 | 21.889218000 | 15.315393000 |
| O  | 16.986310000 | 28.827615000 | 13.440450000 | H             | 27.789664000 | 23.637818000 | 14.406114000 |
| O  | 9.894590000  | 28.827615000 | 13.440450000 | H             | 23.571143000 | 26.245052000 | 13.923664000 |
| C  | 22.671082000 | 26.880900000 | 22.671082000 | H             | 21.065929000 | 25.384355000 | 15.432177000 |
| C  | 20.687003000 | 26.880900000 | 20.687003000 | H             | 24.093675000 | 22.583796000 | 13.678981000 |
| C  | 21.360638000 | 27.201858000 | 22.988008000 | H             | 26.479764000 | 24.016843000 | 13.292475000 |
| C  | 20.384593000 | 27.216911000 | 22.003898000 | H             | 22.807712000 | 27.149395000 | 16.739143000 |
| H  | 21.176773000 | 27.364756000 | 23.999268000 | H             | 24.006270000 | 27.899003000 | 15.711795000 |
| H  | 19.491341000 | 27.477656000 | 22.313835000 | H             | 26.272395000 | 21.641762000 | 14.051197000 |
| O  | 13.440450000 | 28.827615000 | 16.986310000 | H             | 26.300921000 | 22.192018000 | 15.735444000 |
| C  | 13.440450000 | 30.034298000 | 16.593848000 | H             | 25.530541000 | 26.570300000 | 16.750026000 |
| O  | 13.440450000 | 28.827615000 | 9.894590000  | H             | 24.300707000 | 25.528280000 | 17.451521000 |
| C  | 13.440450000 | 30.034298000 | 10.287052000 | H             | 22.762859000 | 24.385322000 | 16.798989000 |
| O  | 13.440450000 | 30.426760000 | 15.387165000 | H             | 22.277472000 | 23.140232000 | 15.691046000 |
| O  | 13.440450000 | 30.426760000 | 11.493735000 | C             | 27.177617000 | 28.264605000 | 18.374264000 |
| C  | 17.333342000 | 27.201858000 | 18.960712000 | O             | 27.589848000 | 27.823529000 | 19.376165000 |
| C  | 18.317452000 | 27.216911000 | 19.936757000 | O             | 26.743873000 | 28.757656000 | 17.406568000 |
| H  | 16.322082000 | 27.364756000 | 19.144577000 | <b>e. TS1</b> |              |              |              |
| H  | 18.007515000 | 27.477656000 | 20.830009000 | N             | 26.516182000 | 21.876816000 | 20.391322000 |
| H  | 13.440450000 | 30.790903000 | 9.530447000  | N             | 26.805017000 | 19.926708000 | 18.438493000 |
| H  | 17.350453000 | 26.880900000 | 9.530447000  | C             | 26.653045000 | 20.593593000 | 20.783136000 |
| H  | 17.350453000 | 30.790903000 | 13.440450000 | C             | 26.561198000 | 22.851882000 | 21.309281000 |
| H  | 13.440450000 | 30.790903000 | 17.350453000 | C             | 26.809759000 | 18.999110000 | 17.463652000 |
| H  | 9.530447000  | 30.790903000 | 13.440450000 | C             | 26.641787000 | 19.540198000 | 19.725385000 |
| H  | 9.530447000  | 26.880900000 | 17.350453000 | C             | 26.817358000 | 20.278009000 | 22.141055000 |
| H  | 13.440450000 | 22.970897000 | 9.530447000  | C             | 26.715165000 | 22.632242000 | 22.690535000 |

| Journal Name |              |              |              | ARTICLE |              |              |              |
|--------------|--------------|--------------|--------------|---------|--------------|--------------|--------------|
| C            | 26.701338000 | 17.622947000 | 17.687478000 | O       | 23.334864000 | 28.827596000 | 26.880937000 |
| C            | 26.470846000 | 18.179560000 | 20.027035000 | O       | 24.934210000 | 30.426941000 | 26.880925000 |
| C            | 26.835997000 | 21.293608000 | 23.087357000 | O       | 26.880889000 | 30.426939000 | 24.934203000 |
| C            | 26.517282000 | 17.226795000 | 19.020475000 | O       | 26.880879000 | 30.426942000 | 28.827590000 |
| C            | 26.809925000 | 23.730886000 | 23.728973000 | O       | 27.912786000 | 27.912776000 | 27.912777000 |
| C            | 26.809925000 | 16.592377000 | 16.590464000 | O       | 28.827596000 | 30.426944000 | 26.880863000 |
| O            | 26.880885000 | 24.934153000 | 23.334955000 | O       | 30.426933000 | 24.934198000 | 26.880924000 |
| O            | 26.880903000 | 23.334945000 | 24.934136000 | O       | 30.426936000 | 26.880929000 | 24.934199000 |
| O            | 26.880903000 | 15.387214000 | 16.986405000 | O       | 30.426944000 | 26.880866000 | 28.827595000 |
| O            | 26.880885000 | 16.986395000 | 15.387197000 | O       | 30.426946000 | 28.827594000 | 26.880867000 |
| Zr           | 26.878142000 | 26.881612000 | 24.237883000 | O       | 24.934211000 | 26.880924000 | 30.426942000 |
| Zr           | 26.878209000 | 24.239690000 | 26.880717000 | O       | 26.880889000 | 24.934201000 | 30.426937000 |
| Zr           | 26.878209000 | 13.440633000 | 16.081660000 | O       | 26.880878000 | 28.827589000 | 30.426943000 |
| Zr           | 26.878142000 | 16.083467000 | 13.439738000 | O       | 28.827598000 | 26.880862000 | 30.426940000 |
| O            | 24.934203000 | 26.880849000 | 23.334882000 | O       | 25.848909000 | 12.408453000 | 12.408455000 |
| O            | 25.848911000 | 25.848918000 | 25.848917000 | O       | 23.334862000 | 11.493756000 | 13.440411000 |
| O            | 25.849015000 | 27.912768000 | 25.849028000 | O       | 23.334855000 | 15.387135000 | 13.440484000 |
| O            | 27.912782000 | 25.849032000 | 25.849031000 | O       | 23.334864000 | 13.440413000 | 11.493754000 |
| O            | 27.912889000 | 27.912886000 | 25.848919000 | O       | 23.334856000 | 13.440488000 | 15.387138000 |
| O            | 26.880945000 | 28.827581000 | 23.334856000 | O       | 24.934211000 | 9.894408000  | 13.440426000 |
| O            | 28.827591000 | 26.880922000 | 23.334870000 | O       | 26.880889000 | 9.894413000  | 15.387149000 |
| O            | 24.934197000 | 23.334881000 | 26.880846000 | O       | 27.912786000 | 12.408573000 | 12.408574000 |
| O            | 25.849012000 | 25.849025000 | 27.912771000 | O       | 26.880878000 | 9.894407000  | 11.493761000 |
| O            | 27.912892000 | 25.848913000 | 27.912887000 | O       | 28.827598000 | 9.894410000  | 13.440488000 |
| O            | 26.880944000 | 23.334850000 | 28.827576000 | O       | 30.426944000 | 11.493755000 | 13.440484000 |
| O            | 28.827591000 | 23.334868000 | 26.880917000 | O       | 30.426936000 | 15.387151000 | 13.440421000 |
| O            | 25.849012000 | 12.408579000 | 14.472325000 | O       | 30.426946000 | 13.440483000 | 11.493756000 |
| O            | 25.848911000 | 14.472433000 | 14.472432000 | O       | 30.426933000 | 13.440426000 | 15.387152000 |
| O            | 24.934197000 | 13.440504000 | 16.986469000 | O       | 24.934210000 | 13.440425000 | 9.894409000  |
| O            | 26.880944000 | 11.493774000 | 16.986500000 | O       | 26.880879000 | 11.493760000 | 9.894408000  |
| O            | 27.912892000 | 12.408463000 | 14.472437000 | O       | 26.880889000 | 15.387147000 | 9.894411000  |
| O            | 27.912782000 | 14.472319000 | 14.472318000 | O       | 28.827596000 | 13.440487000 | 9.894406000  |
| O            | 28.827591000 | 13.440433000 | 16.986482000 | C       | 23.753697000 | 27.066116000 | 30.007949000 |
| O            | 25.849015000 | 14.472322000 | 12.408582000 | C       | 23.753135000 | 30.008630000 | 27.063604000 |
| O            | 24.934203000 | 16.986468000 | 13.440501000 | C       | 26.696398000 | 30.008246000 | 30.008106000 |
| O            | 27.912889000 | 14.472431000 | 12.408464000 | C       | 30.007968000 | 30.008237000 | 26.695581000 |
| O            | 26.880945000 | 16.986494000 | 11.493769000 | C       | 30.008286000 | 26.697416000 | 30.008420000 |
| O            | 28.827591000 | 16.986480000 | 13.440428000 | C       | 23.753697000 | 10.313401000 | 13.255234000 |
| C            | 23.755332000 | 26.686089000 | 23.755213000 | C       | 23.753135000 | 13.257746000 | 10.312720000 |
| Zr           | 24.236612000 | 26.881475000 | 26.880552000 | C       | 26.696398000 | 10.313244000 | 10.313104000 |
| Zr           | 26.880671000 | 29.524609000 | 26.880680000 | C       | 30.008286000 | 10.312930000 | 13.623934000 |
| Zr           | 29.524440000 | 26.882357000 | 26.881381000 | C       | 30.007968000 | 13.625768000 | 10.313113000 |
| C            | 27.064326000 | 30.008530000 | 23.753165000 | H       | 27.351814000 | 30.759513000 | 23.002127000 |
| C            | 30.008123000 | 27.066993000 | 23.753823000 | H       | 30.758179000 | 27.358190000 | 23.003211000 |
| C            | 23.755714000 | 23.756676000 | 26.684338000 | H       | 23.008991000 | 23.009158000 | 26.377462000 |
| Zr           | 26.880615000 | 26.881402000 | 29.524137000 | H       | 27.355985000 | 23.003402000 | 30.758391000 |
| C            | 27.065914000 | 23.754135000 | 30.008060000 | H       | 30.757581000 | 23.004153000 | 27.359935000 |
| C            | 30.007964000 | 23.754748000 | 27.067567000 | H       | 23.008991000 | 13.943888000 | 17.312192000 |
| Zr           | 24.236612000 | 13.440798000 | 13.439875000 | H       | 27.355985000 | 9.562959000  | 17.317948000 |
| Zr           | 26.880615000 | 10.797213000 | 13.439948000 | H       | 30.757582000 | 12.961415000 | 17.317197000 |
| C            | 23.755714000 | 13.637012000 | 16.564674000 | H       | 27.351814000 | 17.319223000 | 9.561837000  |
| C            | 27.065914000 | 10.313290000 | 16.567215000 | H       | 30.758179000 | 17.318139000 | 12.963160000 |
| Zr           | 29.524440000 | 13.439969000 | 13.438993000 | H       | 23.003255000 | 27.356162000 | 30.758555000 |
| C            | 30.007964000 | 13.253783000 | 16.566602000 | H       | 23.001913000 | 30.759916000 | 27.349810000 |
| Zr           | 26.880671000 | 13.440670000 | 10.796741000 | H       | 26.407446000 | 30.758917000 | 30.758911000 |
| C            | 23.755332000 | 16.566137000 | 13.635261000 | H       | 30.758582000 | 30.758568000 | 26.405278000 |
| C            | 27.064326000 | 16.568185000 | 10.312820000 | H       | 30.759373000 | 26.409850000 | 30.759355000 |
| C            | 30.008123000 | 16.567527000 | 13.254357000 | H       | 23.003255000 | 9.562795000  | 12.965188000 |
| O            | 23.334855000 | 26.880866000 | 24.934215000 | H       | 23.001913000 | 12.971540000 | 9.561434000  |
| O            | 23.334856000 | 24.934212000 | 26.880862000 | H       | 26.407446000 | 9.562439000  | 9.562434000  |
| O            | 25.848909000 | 27.912895000 | 27.912897000 | H       | 30.759373000 | 9.561995000  | 13.911500000 |
| O            | 23.334862000 | 26.880939000 | 28.827594000 | H       | 30.758582000 | 13.916071000 | 9.562782000  |

## ARTICLE

## Journal Name

|    |              |              |              |    |              |              |              |
|----|--------------|--------------|--------------|----|--------------|--------------|--------------|
| H  | 25.215026000 | 11.776433000 | 15.102845000 | C  | 16.593848000 | 26.880900000 | 16.593848000 |
| H  | 28.544134000 | 11.776251000 | 11.775822000 | C  | 17.650268000 | 26.880900000 | 17.650268000 |
| H  | 28.555271000 | 15.099035000 | 15.098322000 | C  | 19.634347000 | 26.880900000 | 19.634347000 |
| H  | 25.215244000 | 15.103495000 | 11.776660000 | O  | 9.894590000  | 26.880900000 | 15.387165000 |
| H  | 25.215244000 | 28.544690000 | 25.217855000 | C  | 10.287052000 | 26.880900000 | 16.593848000 |
| H  | 28.555271000 | 25.223028000 | 25.222315000 | Zr | 13.440450000 | 26.880900000 | 15.923976000 |
| H  | 28.544134000 | 28.545528000 | 28.545099000 | O  | 11.493735000 | 26.880900000 | 16.986310000 |
| H  | 25.215026000 | 25.218505000 | 28.544917000 | O  | 14.472677000 | 27.913127000 | 14.472677000 |
| O  | 14.472677000 | 25.848673000 | 14.472677000 | Zr | 13.440450000 | 26.880900000 | 10.956924000 |
| O  | 12.408223000 | 25.848673000 | 12.408223000 | O  | 11.493735000 | 26.880900000 | 9.894590000  |
| O  | 14.472677000 | 25.848673000 | 12.408223000 | O  | 15.387165000 | 26.880900000 | 9.894590000  |
| O  | 12.408223000 | 25.848673000 | 14.472677000 | O  | 12.408223000 | 27.913127000 | 12.408223000 |
| Zr | 13.440450000 | 24.397374000 | 13.440450000 | O  | 15.387165000 | 26.880900000 | 16.986310000 |
| O  | 11.493735000 | 23.335040000 | 13.440450000 | Zr | 13.440450000 | 29.364426000 | 13.440450000 |
| C  | 10.287052000 | 23.727502000 | 13.440450000 | O  | 11.493735000 | 30.426760000 | 13.440450000 |
| O  | 15.387165000 | 23.335040000 | 13.440450000 | C  | 10.287052000 | 30.034298000 | 13.440450000 |
| C  | 16.593848000 | 23.727502000 | 13.440450000 | O  | 15.387165000 | 30.426760000 | 13.440450000 |
| C  | 17.650268000 | 22.671082000 | 13.440450000 | C  | 16.593848000 | 30.034298000 | 13.440450000 |
| C  | 19.634347000 | 20.687003000 | 13.440450000 | O  | 16.986310000 | 28.827615000 | 13.440450000 |
| C  | 18.960712000 | 22.988008000 | 13.761408000 | O  | 9.894590000  | 28.827615000 | 13.440450000 |
| C  | 19.936757000 | 22.003898000 | 13.776461000 | C  | 22.671082000 | 26.880900000 | 22.671082000 |
| H  | 19.144577000 | 23.999268000 | 13.924306000 | C  | 20.687003000 | 26.880900000 | 20.687003000 |
| H  | 20.830009000 | 22.313835000 | 14.037206000 | C  | 21.360638000 | 27.201858000 | 22.988008000 |
| O  | 9.894590000  | 24.934185000 | 13.440450000 | C  | 20.384593000 | 27.216911000 | 22.003898000 |
| O  | 16.986310000 | 24.934185000 | 13.440450000 | H  | 21.176773000 | 27.364756000 | 23.999268000 |
| C  | 17.333342000 | 21.360638000 | 13.119492000 | H  | 19.491341000 | 27.477656000 | 22.313835000 |
| C  | 18.317452000 | 20.384593000 | 13.104439000 | O  | 13.440450000 | 28.827615000 | 16.986310000 |
| H  | 16.322082000 | 21.176773000 | 12.956594000 | C  | 13.440450000 | 30.034298000 | 16.593848000 |
| H  | 18.007515000 | 19.491341000 | 12.843694000 | O  | 13.440450000 | 28.827615000 | 9.894590000  |
| C  | 22.988008000 | 26.559942000 | 21.360638000 | C  | 13.440450000 | 30.034298000 | 10.287052000 |
| C  | 22.003898000 | 26.544889000 | 20.384593000 | O  | 13.440450000 | 30.426760000 | 15.387165000 |
| H  | 23.999268000 | 26.397044000 | 21.176773000 | O  | 13.440450000 | 30.426760000 | 11.493735000 |
| H  | 22.313835000 | 26.284144000 | 19.491341000 | C  | 17.333342000 | 27.201858000 | 18.960712000 |
| C  | 22.671082000 | 17.650268000 | 13.440450000 | C  | 18.317452000 | 27.216911000 | 19.936757000 |
| C  | 20.687003000 | 19.634347000 | 13.440450000 | H  | 16.322082000 | 27.364756000 | 19.144577000 |
| O  | 13.440450000 | 24.934185000 | 9.894590000  | H  | 18.007515000 | 27.477656000 | 20.830009000 |
| C  | 13.440450000 | 23.727502000 | 10.287052000 | H  | 13.440450000 | 30.790903000 | 9.530447000  |
| O  | 13.440450000 | 24.934185000 | 16.986310000 | H  | 17.350453000 | 26.880900000 | 9.530447000  |
| C  | 13.440450000 | 23.727502000 | 16.593848000 | H  | 17.350453000 | 30.790903000 | 13.440450000 |
| O  | 13.440450000 | 23.335040000 | 15.387165000 | H  | 13.440450000 | 30.790903000 | 17.350453000 |
| O  | 13.440450000 | 23.335040000 | 11.493735000 | H  | 9.530447000  | 30.790903000 | 13.440450000 |
| C  | 18.960712000 | 26.559942000 | 17.333342000 | H  | 9.530447000  | 26.880900000 | 17.350453000 |
| C  | 19.936757000 | 26.544889000 | 18.317452000 | H  | 13.440450000 | 22.970897000 | 9.530447000  |
| H  | 19.144577000 | 26.397044000 | 16.322082000 | H  | 9.530447000  | 22.970897000 | 13.440450000 |
| H  | 20.830009000 | 26.284144000 | 18.007515000 | H  | 13.440450000 | 22.970897000 | 17.350453000 |
| C  | 21.360638000 | 17.333342000 | 13.119492000 | H  | 15.026933000 | 25.294417000 | 11.853967000 |
| C  | 20.384593000 | 18.317452000 | 13.104439000 | H  | 11.853967000 | 28.467383000 | 11.853967000 |
| H  | 21.176773000 | 16.322082000 | 12.956594000 | H  | 9.530447000  | 26.880900000 | 9.530447000  |
| H  | 19.491341000 | 18.007515000 | 12.843694000 | H  | 15.026933000 | 28.467383000 | 15.026933000 |
| C  | 22.988008000 | 18.960712000 | 13.761408000 | H  | 11.853967000 | 25.294417000 | 15.026933000 |
| C  | 22.003898000 | 19.936757000 | 13.776461000 | H  | 26.467029000 | 23.866686000 | 20.925171000 |
| H  | 23.999268000 | 19.144577000 | 13.924306000 | H  | 26.907903000 | 19.383185000 | 16.450835000 |
| H  | 22.313835000 | 20.830009000 | 14.037206000 | H  | 26.956318000 | 19.249979000 | 22.460803000 |
| Zr | 10.956924000 | 26.880900000 | 13.440450000 | H  | 26.287817000 | 17.866393000 | 21.049580000 |
| O  | 9.894590000  | 26.880900000 | 11.493735000 | H  | 26.966392000 | 21.067317000 | 24.140946000 |
| O  | 12.408223000 | 27.913127000 | 14.472677000 | H  | 26.406793000 | 16.171295000 | 19.248247000 |
| C  | 10.287052000 | 26.880900000 | 10.287052000 | Cu | 26.565872000 | 21.916197000 | 17.874328000 |
| Zr | 15.923976000 | 26.880900000 | 13.440450000 | Br | 24.441635000 | 21.481325000 | 16.855140000 |
| O  | 16.986310000 | 26.880900000 | 11.493735000 | C  | 27.246045000 | 23.756120000 | 17.369967000 |
| C  | 16.593848000 | 26.880900000 | 10.287052000 | C  | 28.176687000 | 23.065424000 | 17.839830000 |
| O  | 16.986310000 | 26.880900000 | 15.387165000 | H  | 29.161051000 | 22.829578000 | 18.195564000 |
| O  | 14.472677000 | 27.913127000 | 12.408223000 | C  | 26.448950000 | 24.811034000 | 16.684968000 |



| Journal Name  |              |              |              | ARTICLE |              |              |              |
|---------------|--------------|--------------|--------------|---------|--------------|--------------|--------------|
| H             | 26.967331000 | 25.759064000 | 16.928035000 | O       | 26.880945000 | 28.827581000 | 23.334856000 |
| H             | 25.451113000 | 24.856730000 | 17.155400000 | O       | 28.827591000 | 26.880922000 | 23.334870000 |
| O             | 26.368299000 | 24.628451000 | 15.327375000 | O       | 24.934197000 | 23.334881000 | 26.880846000 |
| H             | 26.404966000 | 23.217043000 | 14.765431000 | O       | 25.849012000 | 25.849025000 | 27.912771000 |
| C             | 25.382066000 | 23.622795000 | 10.899903000 | O       | 27.912892000 | 25.848913000 | 27.912887000 |
| C             | 24.585391000 | 24.262034000 | 12.035685000 | O       | 26.880944000 | 23.334850000 | 28.827576000 |
| C             | 24.391360000 | 23.365436000 | 13.282247000 | O       | 28.827591000 | 23.334868000 | 26.880917000 |
| C             | 24.764783000 | 22.366363000 | 10.287817000 | O       | 25.849012000 | 12.408579000 | 14.472325000 |
| C             | 25.381969000 | 22.247458000 | 13.319248000 | O       | 25.848911000 | 14.472433000 | 14.472432000 |
| C             | 24.306797000 | 21.354249000 | 11.340371000 | O       | 24.934197000 | 13.440504000 | 16.986469000 |
| N             | 25.245675000 | 21.223258000 | 12.451158000 | O       | 26.880944000 | 11.493774000 | 16.986500000 |
| H             | 25.540426000 | 24.363820000 | 10.109905000 | O       | 27.912892000 | 12.408463000 | 14.472437000 |
| H             | 25.491932000 | 21.900492000 | 9.611080000  | O       | 27.912782000 | 14.472319000 | 14.472318000 |
| C             | 27.421049000 | 21.332842000 | 14.272740000 | O       | 28.827591000 | 13.440433000 | 16.986482000 |
| N             | 26.374671000 | 22.324829000 | 14.161196000 | O       | 25.849015000 | 14.472322000 | 12.408582000 |
| C             | 26.955030000 | 20.007277000 | 13.700475000 | O       | 24.934203000 | 16.986468000 | 13.440501000 |
| C             | 26.301756000 | 20.219996000 | 12.347639000 | O       | 27.912889000 | 14.472431000 | 12.408464000 |
| H             | 25.853441000 | 19.292224000 | 11.983237000 | O       | 26.880945000 | 16.986494000 | 11.493769000 |
| H             | 27.673613000 | 21.243998000 | 15.338641000 | O       | 28.827591000 | 16.986480000 | 13.440428000 |
| H             | 26.386597000 | 23.391219000 | 11.279154000 | C       | 23.755332000 | 26.686089000 | 23.755213000 |
| H             | 23.895537000 | 22.624822000 | 9.670217000  | Zr      | 24.236612000 | 26.881475000 | 26.880552000 |
| H             | 27.047982000 | 20.539422000 | 11.601416000 | Zr      | 26.880671000 | 29.524609000 | 26.880680000 |
| H             | 28.319064000 | 21.707897000 | 13.761409000 | Zr      | 29.524440000 | 26.882357000 | 26.881381000 |
| H             | 23.604064000 | 24.591892000 | 11.673816000 | C       | 27.064326000 | 30.008530000 | 23.753165000 |
| H             | 25.127983000 | 25.156092000 | 12.354587000 | C       | 30.008123000 | 27.066993000 | 23.753823000 |
| H             | 27.788271000 | 19.304623000 | 13.605198000 | C       | 23.755714000 | 23.756676000 | 26.684338000 |
| H             | 26.226105000 | 19.559823000 | 14.385229000 | Zr      | 26.880615000 | 26.881402000 | 29.524137000 |
| H             | 24.527027000 | 23.950191000 | 14.194683000 | C       | 27.065914000 | 23.754135000 | 30.008060000 |
| H             | 23.385888000 | 22.936115000 | 13.316780000 | C       | 30.007964000 | 23.754748000 | 27.067567000 |
| H             | 23.332602000 | 21.645987000 | 11.742856000 | Zr      | 24.236612000 | 13.440798000 | 13.439875000 |
| H             | 24.175946000 | 20.356252000 | 10.911031000 | Zr      | 26.880615000 | 10.797213000 | 13.439948000 |
| C             | 27.890814000 | 25.350968000 | 14.334010000 | C       | 23.755714000 | 13.637012000 | 16.564674000 |
| O             | 28.507210000 | 25.996996000 | 15.122476000 | C       | 27.065914000 | 10.313290000 | 16.567215000 |
| O             | 27.699630000 | 24.894374000 | 13.245442000 | Zr      | 29.524440000 | 13.439969000 | 13.438993000 |
| <b>f. IM1</b> |              |              |              | C       | 30.007964000 | 13.253783000 | 16.566602000 |
| N             | 26.631685000 | 21.878151000 | 20.385536000 | Zr      | 26.880671000 | 13.440670000 | 10.796741000 |
| N             | 26.838967000 | 19.914414000 | 18.454526000 | C       | 23.755332000 | 16.566137000 | 13.635261000 |
| C             | 26.654299000 | 20.591355000 | 20.790446000 | C       | 27.064326000 | 16.568185000 | 10.312820000 |
| C             | 26.670310000 | 22.852903000 | 21.303849000 | C       | 30.008123000 | 16.567527000 | 13.254357000 |
| C             | 26.822481000 | 18.995485000 | 17.473330000 | O       | 23.334855000 | 26.880866000 | 24.934215000 |
| C             | 26.637854000 | 19.533387000 | 19.736329000 | O       | 23.334856000 | 24.934212000 | 26.880862000 |
| C             | 26.706089000 | 20.273852000 | 22.156527000 | O       | 25.848909000 | 27.912895000 | 27.912897000 |
| C             | 26.715568000 | 22.631702000 | 22.692492000 | O       | 23.334862000 | 26.880939000 | 28.827594000 |
| C             | 26.689665000 | 17.620355000 | 17.690323000 | O       | 23.334864000 | 28.827596000 | 26.880937000 |
| C             | 26.430326000 | 18.175876000 | 20.028895000 | O       | 24.934210000 | 30.426941000 | 26.880925000 |
| C             | 26.730141000 | 21.291713000 | 23.100223000 | O       | 26.880889000 | 30.426939000 | 24.934203000 |
| C             | 26.484756000 | 17.224238000 | 19.019939000 | O       | 26.880879000 | 30.426942000 | 28.827590000 |
| C             | 26.809925000 | 23.730886000 | 23.728973000 | O       | 27.912786000 | 27.912776000 | 27.912777000 |
| C             | 26.809925000 | 16.592377000 | 16.590464000 | O       | 28.827596000 | 30.426944000 | 26.880863000 |
| O             | 26.880885000 | 24.934153000 | 23.334955000 | O       | 30.426933000 | 24.934198000 | 26.880924000 |
| O             | 26.880903000 | 23.334945000 | 24.934136000 | O       | 30.426936000 | 26.880929000 | 24.934199000 |
| O             | 26.880903000 | 15.387214000 | 16.986405000 | O       | 30.426944000 | 26.880866000 | 28.827595000 |
| O             | 26.880885000 | 16.986395000 | 15.387197000 | O       | 30.426946000 | 28.827594000 | 26.880867000 |
| Zr            | 26.878142000 | 26.881612000 | 24.237883000 | O       | 24.934211000 | 26.880924000 | 30.426942000 |
| Zr            | 26.878209000 | 24.239690000 | 26.880717000 | O       | 26.880889000 | 24.934201000 | 30.426937000 |
| Zr            | 26.878209000 | 13.440633000 | 16.081660000 | O       | 26.880878000 | 28.827589000 | 30.426943000 |
| Zr            | 26.878142000 | 16.083467000 | 13.439738000 | O       | 28.827598000 | 26.880862000 | 30.426940000 |
| O             | 24.934203000 | 26.880849000 | 23.334882000 | O       | 25.848909000 | 12.408453000 | 12.408455000 |
| O             | 25.848911000 | 25.848918000 | 25.848917000 | O       | 23.334862000 | 11.493756000 | 13.440411000 |
| O             | 25.849015000 | 27.912768000 | 25.849028000 | O       | 23.334855000 | 15.387135000 | 13.440484000 |
| O             | 27.912782000 | 25.849032000 | 25.849031000 | O       | 23.334864000 | 13.440413000 | 11.493754000 |
| O             | 27.912889000 | 27.912886000 | 25.848919000 | O       | 23.334856000 | 13.440488000 | 15.387138000 |

## ARTICLE

## Journal Name

|    |              |              |              |    |              |              |              |
|----|--------------|--------------|--------------|----|--------------|--------------|--------------|
| O  | 24.934211000 | 9.894408000  | 13.440426000 | C  | 18.960712000 | 22.988008000 | 13.761408000 |
| O  | 26.880889000 | 9.894413000  | 15.387149000 | C  | 19.936757000 | 22.003898000 | 13.776461000 |
| O  | 27.912786000 | 12.408573000 | 12.408574000 | H  | 19.144577000 | 23.999268000 | 13.924306000 |
| O  | 26.880878000 | 9.894407000  | 11.493761000 | H  | 20.830009000 | 22.313835000 | 14.037206000 |
| O  | 28.827598000 | 9.894410000  | 13.440488000 | O  | 9.894590000  | 24.934185000 | 13.440450000 |
| O  | 30.426944000 | 11.493755000 | 13.440484000 | O  | 16.986310000 | 24.934185000 | 13.440450000 |
| O  | 30.426936000 | 15.387151000 | 13.440421000 | C  | 17.333342000 | 21.360638000 | 13.119492000 |
| O  | 30.426946000 | 13.440483000 | 11.493756000 | C  | 18.317452000 | 20.384593000 | 13.104439000 |
| O  | 30.426933000 | 13.440426000 | 15.387152000 | H  | 16.322082000 | 21.176773000 | 12.956594000 |
| O  | 24.934210000 | 13.440425000 | 9.894409000  | H  | 18.007515000 | 19.491341000 | 12.843694000 |
| O  | 26.880879000 | 11.493760000 | 9.894408000  | C  | 22.988008000 | 26.559942000 | 21.360638000 |
| O  | 26.880889000 | 15.387147000 | 9.894411000  | C  | 22.003898000 | 26.544889000 | 20.384593000 |
| O  | 28.827596000 | 13.440487000 | 9.894406000  | H  | 23.999268000 | 26.397044000 | 21.176773000 |
| C  | 23.753697000 | 27.066116000 | 30.007949000 | H  | 22.313835000 | 26.284144000 | 19.491341000 |
| C  | 23.753135000 | 30.008630000 | 27.063604000 | C  | 22.671082000 | 17.650268000 | 13.440450000 |
| C  | 26.696398000 | 30.008246000 | 30.008106000 | C  | 20.687003000 | 19.634347000 | 13.440450000 |
| C  | 30.007968000 | 30.008237000 | 26.695581000 | O  | 13.440450000 | 24.934185000 | 9.894590000  |
| C  | 30.008286000 | 26.697416000 | 30.008420000 | C  | 13.440450000 | 23.727502000 | 10.287052000 |
| C  | 23.753697000 | 10.313401000 | 13.255234000 | O  | 13.440450000 | 24.934185000 | 16.986310000 |
| C  | 23.753135000 | 13.257746000 | 10.312720000 | C  | 13.440450000 | 23.727502000 | 16.593848000 |
| C  | 26.696398000 | 10.313244000 | 10.313104000 | O  | 13.440450000 | 23.335040000 | 15.387165000 |
| C  | 30.008286000 | 10.312930000 | 13.623934000 | O  | 13.440450000 | 23.335040000 | 11.493735000 |
| C  | 30.007968000 | 13.625768000 | 10.313113000 | C  | 18.960712000 | 26.559942000 | 17.333342000 |
| H  | 27.351814000 | 30.759513000 | 23.002127000 | C  | 19.936757000 | 26.544889000 | 18.317452000 |
| H  | 30.758179000 | 27.358190000 | 23.003211000 | H  | 19.144577000 | 26.397044000 | 16.322082000 |
| H  | 23.008991000 | 23.009158000 | 26.377462000 | H  | 20.830009000 | 26.284144000 | 12.007515000 |
| H  | 27.355985000 | 23.003402000 | 30.758391000 | C  | 21.360638000 | 17.333342000 | 13.119492000 |
| H  | 30.757581000 | 23.004153000 | 27.359935000 | C  | 20.384593000 | 18.317452000 | 13.104439000 |
| H  | 23.008991000 | 13.943888000 | 17.312192000 | H  | 21.176773000 | 16.322082000 | 12.956594000 |
| H  | 27.355985000 | 9.562959000  | 17.317948000 | H  | 19.491341000 | 18.007515000 | 12.843694000 |
| H  | 30.757582000 | 12.961415000 | 17.317197000 | C  | 22.988008000 | 18.960712000 | 13.761408000 |
| H  | 27.351814000 | 17.319223000 | 9.561837000  | C  | 22.003898000 | 19.936757000 | 13.776461000 |
| H  | 30.758179000 | 17.318139000 | 12.963160000 | H  | 23.999268000 | 19.144577000 | 13.924306000 |
| H  | 23.003255000 | 27.356162000 | 30.758555000 | H  | 22.313835000 | 20.830009000 | 14.037206000 |
| H  | 23.001913000 | 30.759916000 | 27.349810000 | Zr | 10.956924000 | 26.880900000 | 13.440450000 |
| H  | 26.407446000 | 30.758917000 | 30.758911000 | O  | 9.894590000  | 26.880900000 | 11.493735000 |
| H  | 30.758582000 | 30.758568000 | 26.405278000 | O  | 12.408223000 | 27.913127000 | 14.472677000 |
| H  | 30.759373000 | 26.409850000 | 30.759355000 | C  | 10.287052000 | 26.880900000 | 10.287052000 |
| H  | 23.003255000 | 9.562795000  | 12.965188000 | Zr | 15.923976000 | 26.880900000 | 13.440450000 |
| H  | 23.001913000 | 12.971540000 | 9.561434000  | O  | 16.986310000 | 26.880900000 | 11.493735000 |
| H  | 26.407446000 | 9.562439000  | 9.562434000  | C  | 16.593848000 | 26.880900000 | 10.287052000 |
| H  | 30.759373000 | 9.561995000  | 13.911500000 | O  | 16.986310000 | 26.880900000 | 15.387165000 |
| H  | 30.758582000 | 13.916071000 | 9.562782000  | O  | 14.472677000 | 27.913127000 | 12.408223000 |
| H  | 25.215026000 | 11.776433000 | 15.102845000 | C  | 16.593848000 | 26.880900000 | 16.593848000 |
| H  | 28.544134000 | 11.776251000 | 11.775822000 | C  | 17.650268000 | 26.880900000 | 17.650268000 |
| H  | 28.555271000 | 15.099035000 | 15.098322000 | C  | 19.634347000 | 26.880900000 | 19.634347000 |
| H  | 25.215244000 | 15.103495000 | 11.776660000 | O  | 9.894590000  | 26.880900000 | 15.387165000 |
| H  | 25.215244000 | 28.544690000 | 25.217855000 | C  | 10.287052000 | 26.880900000 | 16.593848000 |
| H  | 28.555271000 | 25.223028000 | 25.223150000 | Zr | 13.440450000 | 26.880900000 | 15.923976000 |
| H  | 28.544134000 | 28.545528000 | 28.545099000 | O  | 11.493735000 | 26.880900000 | 16.986310000 |
| H  | 25.215026000 | 25.218505000 | 28.544917000 | O  | 14.472677000 | 27.913127000 | 14.472677000 |
| O  | 14.472677000 | 25.848673000 | 14.472677000 | Zr | 13.440450000 | 26.880900000 | 10.956924000 |
| O  | 12.408223000 | 25.848673000 | 12.408223000 | O  | 11.493735000 | 26.880900000 | 9.894590000  |
| O  | 14.472677000 | 25.848673000 | 12.408223000 | O  | 15.387165000 | 26.880900000 | 9.894590000  |
| O  | 12.408223000 | 25.848673000 | 14.472677000 | O  | 12.408223000 | 27.913127000 | 12.408223000 |
| Zr | 13.440450000 | 24.397374000 | 13.440450000 | O  | 15.387165000 | 26.880900000 | 16.986310000 |
| O  | 11.493735000 | 23.335040000 | 13.440450000 | Zr | 13.440450000 | 29.364426000 | 13.440450000 |
| C  | 10.287052000 | 23.727502000 | 13.440450000 | O  | 11.493735000 | 30.426760000 | 13.440450000 |
| O  | 15.387165000 | 23.335040000 | 13.440450000 | C  | 10.287052000 | 30.034298000 | 13.440450000 |
| C  | 16.593848000 | 23.727502000 | 13.440450000 | O  | 15.387165000 | 30.426760000 | 13.440450000 |
| C  | 17.650268000 | 22.671082000 | 13.440450000 | C  | 16.593848000 | 30.034298000 | 13.440450000 |
| C  | 19.634347000 | 20.687003000 | 13.440450000 | O  | 16.986310000 | 28.827615000 | 13.440450000 |

|    |              |              |              |               |              |              |              |
|----|--------------|--------------|--------------|---------------|--------------|--------------|--------------|
| O  | 9.894590000  | 28.827615000 | 13.440450000 | H             | 27.154524000 | 21.839379000 | 10.486952000 |
| C  | 22.671082000 | 26.880900000 | 22.671082000 | H             | 24.253018000 | 22.457655000 | 11.204680000 |
| C  | 20.687003000 | 26.880900000 | 20.687003000 | H             | 27.077666000 | 19.431132000 | 12.979345000 |
| C  | 21.360638000 | 27.201858000 | 22.988008000 | H             | 29.728378000 | 20.019060000 | 12.849696000 |
| C  | 20.384593000 | 27.216911000 | 22.003898000 | H             | 26.037126000 | 24.594913000 | 11.198732000 |
| H  | 21.176773000 | 27.364756000 | 23.999268000 | H             | 27.569034000 | 24.284815000 | 10.416409000 |
| H  | 19.491341000 | 27.477656000 | 22.313835000 | H             | 28.610765000 | 19.199477000 | 14.885031000 |
| O  | 13.440450000 | 28.827615000 | 16.986310000 | H             | 28.275833000 | 20.874477000 | 15.403084000 |
| C  | 13.440450000 | 30.034298000 | 16.593848000 | H             | 28.489029000 | 24.318457000 | 12.534717000 |
| O  | 13.440450000 | 28.827615000 | 9.894590000  | H             | 26.933129000 | 24.205728000 | 13.304540000 |
| C  | 13.440450000 | 30.034298000 | 10.287052000 | H             | 25.315729000 | 22.933715000 | 13.293734000 |
| O  | 13.440450000 | 30.426760000 | 15.387165000 | H             | 24.809338000 | 21.283470000 | 13.430265000 |
| O  | 13.440450000 | 30.426760000 | 11.493735000 | C             | 30.282622000 | 24.353189000 | 14.980259000 |
| C  | 17.333342000 | 27.201858000 | 18.960712000 | O             | 30.823155000 | 25.001638000 | 15.863022000 |
| C  | 18.317452000 | 27.216911000 | 19.936757000 | O             | 30.678125000 | 23.941247000 | 13.858325000 |
| H  | 16.322082000 | 27.364756000 | 19.144577000 | <b>g. TS2</b> |              |              |              |
| H  | 18.007515000 | 27.477656000 | 20.830009000 | N             | 26.389579000 | 21.813822000 | 20.425811000 |
| H  | 13.440450000 | 30.790903000 | 9.530447000  | N             | 26.675599000 | 19.912140000 | 18.482348000 |
| H  | 17.350453000 | 26.880900000 | 9.530447000  | C             | 26.700310000 | 20.546271000 | 20.815112000 |
| H  | 17.350453000 | 30.790903000 | 13.440450000 | C             | 26.442046000 | 22.809004000 | 21.334252000 |
| H  | 13.440450000 | 30.790903000 | 17.350453000 | C             | 26.657815000 | 18.994434000 | 17.495744000 |
| H  | 9.530447000  | 30.790903000 | 13.440450000 | C             | 26.681548000 | 19.494867000 | 19.775035000 |
| H  | 9.530447000  | 26.880900000 | 17.350453000 | C             | 27.025122000 | 20.281377000 | 22.154337000 |
| H  | 13.440450000 | 22.970897000 | 9.530447000  | C             | 26.733991000 | 22.623427000 | 22.695077000 |
| H  | 9.530447000  | 22.970897000 | 13.440450000 | C             | 26.708113000 | 17.612095000 | 17.701220000 |
| H  | 13.440450000 | 22.970897000 | 17.350453000 | C             | 26.657514000 | 18.120631000 | 20.068760000 |
| H  | 15.026933000 | 25.294417000 | 11.853967000 | C             | 27.016668000 | 21.303182000 | 23.089705000 |
| H  | 11.853967000 | 28.467383000 | 11.853967000 | C             | 26.689046000 | 17.188242000 | 19.045256000 |
| H  | 9.530447000  | 26.880900000 | 9.530447000  | C             | 26.809925000 | 23.730886000 | 23.728973000 |
| H  | 15.026933000 | 28.467383000 | 15.026933000 | C             | 26.809925000 | 16.592377000 | 16.590464000 |
| H  | 11.853967000 | 25.294417000 | 15.026933000 | O             | 26.880885000 | 24.934153000 | 23.334955000 |
| H  | 26.668824000 | 23.870264000 | 20.915934000 | O             | 26.880903000 | 23.334945000 | 24.934136000 |
| H  | 26.929512000 | 19.392908000 | 16.467379000 | O             | 26.880903000 | 15.387214000 | 16.986405000 |
| H  | 26.752081000 | 19.241310000 | 22.487943000 | O             | 26.880885000 | 16.986395000 | 15.387197000 |
| H  | 26.225250000 | 17.859771000 | 21.046217000 | Zr            | 26.878142000 | 26.881612000 | 24.237883000 |
| H  | 26.779713000 | 21.064929000 | 24.160507000 | Zr            | 26.878209000 | 24.239690000 | 26.880717000 |
| H  | 26.362626000 | 16.169279000 | 19.244897000 | Zr            | 26.878209000 | 13.440633000 | 16.081660000 |
| Cu | 27.201470000 | 21.872659000 | 17.876917000 | Zr            | 26.878142000 | 16.083467000 | 16.439738000 |
| Br | 25.400200000 | 22.081032000 | 16.321723000 | O             | 24.934203000 | 26.880849000 | 23.334882000 |
| C  | 28.522902000 | 23.329818000 | 17.458330000 | O             | 25.848911000 | 25.848918000 | 25.848917000 |
| C  | 29.008019000 | 22.548023000 | 18.303341000 | O             | 25.849015000 | 27.912768000 | 25.849028000 |
| H  | 29.721135000 | 22.159600000 | 19.004773000 | O             | 27.912782000 | 25.849032000 | 25.849031000 |
| C  | 28.339082000 | 24.361333000 | 16.419742000 | O             | 27.912889000 | 27.912886000 | 25.848919000 |
| H  | 28.843415000 | 25.273754000 | 16.766430000 | O             | 26.880945000 | 28.827581000 | 23.334856000 |
| H  | 27.271578000 | 24.549340000 | 16.262920000 | O             | 28.827591000 | 26.880922000 | 23.334870000 |
| O  | 28.891871000 | 23.949942000 | 15.192043000 | O             | 24.934197000 | 23.334881000 | 26.880846000 |
| H  | 29.793275000 | 22.826690000 | 13.261583000 | O             | 25.849012000 | 25.849025000 | 27.912771000 |
| C  | 26.322552000 | 22.553050000 | 10.561957000 | O             | 27.912892000 | 25.848913000 | 27.912887000 |
| C  | 26.854752000 | 23.867403000 | 11.132447000 | O             | 26.880944000 | 23.334850000 | 28.827576000 |
| C  | 27.548440000 | 23.763565000 | 12.513680000 | O             | 28.827591000 | 23.334868000 | 26.880917000 |
| C  | 25.194169000 | 21.920523000 | 11.374540000 | O             | 25.849012000 | 12.408579000 | 14.472325000 |
| C  | 27.855622000 | 22.364952000 | 12.947822000 | O             | 25.848911000 | 14.472433000 | 14.472432000 |
| C  | 25.477447000 | 21.937171000 | 12.871698000 | O             | 24.934197000 | 13.440504000 | 16.986469000 |
| N  | 26.845798000 | 21.520706000 | 13.175884000 | O             | 26.880944000 | 11.493774000 | 16.986500000 |
| H  | 25.983973000 | 22.715955000 | 9.533389000  | O             | 27.912892000 | 12.408463000 | 14.472437000 |
| H  | 25.029775000 | 20.890402000 | 11.034246000 | O             | 27.912782000 | 14.472319000 | 14.472318000 |
| C  | 29.499141000 | 20.735397000 | 13.651321000 | O             | 28.827591000 | 13.440433000 | 16.986482000 |
| N  | 29.120676000 | 22.012403000 | 13.067777000 | O             | 25.849015000 | 14.472322000 | 12.408582000 |
| C  | 28.386513000 | 20.209776000 | 14.533578000 | O             | 24.934203000 | 16.986468000 | 13.440501000 |
| C  | 27.080767000 | 20.201836000 | 13.765919000 | O             | 27.912889000 | 14.472431000 | 12.408464000 |
| H  | 26.240763000 | 20.008976000 | 14.441842000 | O             | 26.880945000 | 16.986494000 | 11.493769000 |
| H  | 30.420205000 | 20.904586000 | 14.216735000 | O             | 28.827591000 | 16.986480000 | 13.440428000 |

## ARTICLE

## Journal Name

|    |              |              |              |    |              |              |              |
|----|--------------|--------------|--------------|----|--------------|--------------|--------------|
| C  | 23.755332000 | 26.686089000 | 23.755213000 | C  | 23.753135000 | 13.257746000 | 10.312720000 |
| Zr | 24.236612000 | 26.881475000 | 26.880552000 | C  | 26.696398000 | 10.313244000 | 10.313104000 |
| Zr | 26.880671000 | 29.524609000 | 26.880680000 | C  | 30.008286000 | 10.312930000 | 13.623934000 |
| Zr | 29.524440000 | 26.882357000 | 26.881381000 | C  | 30.007968000 | 13.625768000 | 10.313113000 |
| C  | 27.064326000 | 30.008530000 | 23.753165000 | H  | 27.351814000 | 30.759513000 | 23.002127000 |
| C  | 30.008123000 | 27.066993000 | 23.753823000 | H  | 30.758179000 | 27.358190000 | 23.003211000 |
| C  | 23.755714000 | 23.756676000 | 26.684338000 | H  | 23.008991000 | 23.009158000 | 26.377462000 |
| Zr | 26.880615000 | 26.881402000 | 29.524137000 | H  | 27.355985000 | 23.003402000 | 30.758391000 |
| C  | 27.065914000 | 23.754135000 | 30.008060000 | H  | 30.757581000 | 23.004153000 | 27.359935000 |
| C  | 30.007964000 | 23.754748000 | 27.067567000 | H  | 23.008991000 | 13.943888000 | 17.312192000 |
| Zr | 24.236612000 | 13.440798000 | 13.439875000 | H  | 27.355985000 | 9.562959000  | 17.317948000 |
| Zr | 26.880615000 | 10.797213000 | 13.439948000 | H  | 30.757582000 | 12.961415000 | 17.317197000 |
| C  | 23.755714000 | 13.637012000 | 16.564674000 | H  | 27.351814000 | 17.319223000 | 9.561837000  |
| C  | 27.065914000 | 10.313290000 | 16.567215000 | H  | 30.758179000 | 17.318139000 | 12.963160000 |
| Zr | 29.524440000 | 13.439969000 | 13.438993000 | H  | 23.003255000 | 27.356162000 | 30.758555000 |
| C  | 30.007964000 | 13.253783000 | 16.566602000 | H  | 23.001913000 | 30.759916000 | 27.349810000 |
| Zr | 26.880671000 | 13.440670000 | 10.796741000 | H  | 26.407446000 | 30.758917000 | 30.758911000 |
| C  | 23.755332000 | 16.566137000 | 13.635261000 | H  | 30.758582000 | 30.758568000 | 26.405278000 |
| C  | 27.064326000 | 16.568185000 | 10.312820000 | H  | 30.759373000 | 26.409850000 | 30.759355000 |
| C  | 30.008123000 | 16.567527000 | 13.254357000 | H  | 23.003255000 | 9.562795000  | 12.965188000 |
| O  | 23.334855000 | 26.880866000 | 24.934215000 | H  | 23.001913000 | 12.971540000 | 9.561434000  |
| O  | 23.334856000 | 24.934212000 | 26.880862000 | H  | 26.407446000 | 9.562439000  | 9.562434000  |
| O  | 25.848909000 | 27.912895000 | 27.912897000 | H  | 30.759373000 | 9.561995000  | 13.911500000 |
| O  | 23.334862000 | 26.880939000 | 28.827594000 | H  | 30.758582000 | 13.916071000 | 9.562782000  |
| O  | 23.334864000 | 28.827596000 | 26.880937000 | H  | 25.215026000 | 11.776433000 | 15.102845000 |
| O  | 24.934210000 | 30.426941000 | 26.880925000 | H  | 28.544134000 | 11.776251000 | 11.775822000 |
| O  | 26.880889000 | 30.426939000 | 24.934203000 | H  | 28.555271000 | 15.099035000 | 15.098322000 |
| O  | 26.880879000 | 30.426942000 | 28.827590000 | H  | 25.215244000 | 15.103495000 | 11.776660000 |
| O  | 27.912786000 | 27.912776000 | 27.912777000 | H  | 25.215244000 | 28.544690000 | 25.217855000 |
| O  | 28.827596000 | 30.426944000 | 26.880863000 | H  | 28.555271000 | 25.223028000 | 25.222315000 |
| O  | 30.426933000 | 24.934198000 | 26.880924000 | H  | 28.544134000 | 28.545528000 | 28.545099000 |
| O  | 30.426936000 | 26.880929000 | 24.934199000 | H  | 25.215026000 | 25.218505000 | 28.544917000 |
| O  | 30.426944000 | 26.880866000 | 28.827595000 | O  | 14.472677000 | 25.848673000 | 14.472677000 |
| O  | 30.426946000 | 28.827594000 | 26.880867000 | O  | 12.408223000 | 25.848673000 | 12.408223000 |
| O  | 24.934211000 | 26.880924000 | 30.426942000 | O  | 14.472677000 | 25.848673000 | 12.408223000 |
| O  | 26.880889000 | 24.934201000 | 30.426937000 | O  | 12.408223000 | 25.848673000 | 14.472677000 |
| O  | 26.880878000 | 28.827589000 | 30.426943000 | Zr | 13.440450000 | 24.397374000 | 13.440450000 |
| O  | 28.827598000 | 26.880862000 | 30.426940000 | O  | 11.493735000 | 23.335040000 | 13.440450000 |
| O  | 25.848909000 | 12.408453000 | 12.408455000 | C  | 10.287052000 | 23.727502000 | 13.440450000 |
| O  | 23.334862000 | 11.493756000 | 13.440411000 | O  | 15.387165000 | 23.335040000 | 13.440450000 |
| O  | 23.334855000 | 15.387135000 | 13.440484000 | C  | 16.593848000 | 23.727502000 | 13.440450000 |
| O  | 23.334864000 | 13.440413000 | 11.493754000 | C  | 17.650268000 | 22.671082000 | 13.440450000 |
| O  | 23.334856000 | 13.440488000 | 15.387138000 | C  | 19.634347000 | 20.687003000 | 13.440450000 |
| O  | 24.934211000 | 9.894408000  | 13.440426000 | C  | 18.960712000 | 22.988008000 | 13.761408000 |
| O  | 26.880889000 | 9.894413000  | 15.387149000 | C  | 19.936757000 | 22.003898000 | 13.776461000 |
| O  | 27.912786000 | 12.408573000 | 12.408574000 | H  | 19.144577000 | 23.999268000 | 13.924306000 |
| O  | 26.880878000 | 9.894407000  | 11.493761000 | H  | 20.830009000 | 22.313835000 | 14.037206000 |
| O  | 28.827598000 | 9.894410000  | 13.440488000 | O  | 9.894590000  | 24.934185000 | 13.440450000 |
| O  | 30.426944000 | 11.493755000 | 13.440484000 | O  | 16.986310000 | 24.934185000 | 13.440450000 |
| O  | 30.426936000 | 15.387151000 | 13.440421000 | C  | 17.333342000 | 21.360638000 | 13.119492000 |
| O  | 30.426946000 | 13.440483000 | 11.493756000 | C  | 18.317452000 | 20.384593000 | 13.104439000 |
| O  | 30.426933000 | 13.440426000 | 15.387152000 | H  | 16.322082000 | 21.176773000 | 12.956594000 |
| O  | 24.934210000 | 13.440425000 | 9.894409000  | H  | 18.007515000 | 19.491341000 | 12.843694000 |
| O  | 26.880879000 | 11.493760000 | 9.894408000  | C  | 22.988008000 | 26.559942000 | 21.360638000 |
| O  | 26.880889000 | 15.387147000 | 9.894411000  | C  | 22.003898000 | 26.544889000 | 20.384593000 |
| O  | 28.827596000 | 13.440487000 | 9.894406000  | H  | 23.999268000 | 26.397044000 | 21.176773000 |
| C  | 23.753697000 | 27.066116000 | 30.007949000 | H  | 22.313835000 | 26.284144000 | 19.491341000 |
| C  | 23.753135000 | 30.008630000 | 27.063604000 | C  | 22.671082000 | 17.650268000 | 13.440450000 |
| C  | 26.696398000 | 30.008246000 | 30.008106000 | C  | 20.687003000 | 19.634347000 | 13.440450000 |
| C  | 30.007968000 | 30.008237000 | 26.695581000 | O  | 13.440450000 | 24.934185000 | 9.894590000  |
| C  | 30.008286000 | 26.697416000 | 30.008420000 | C  | 13.440450000 | 23.727502000 | 10.287052000 |
| C  | 23.753697000 | 10.313401000 | 13.255234000 | O  | 13.440450000 | 24.934185000 | 16.986310000 |

| Journal Name | ARTICLE      |              |              |               |              |              |              |
|--------------|--------------|--------------|--------------|---------------|--------------|--------------|--------------|
| C            | 13.440450000 | 23.727502000 | 16.593848000 | H             | 17.350453000 | 30.790903000 | 13.440450000 |
| O            | 13.440450000 | 23.335040000 | 15.387165000 | H             | 13.440450000 | 30.790903000 | 17.350453000 |
| O            | 13.440450000 | 23.335040000 | 11.493735000 | H             | 9.530447000  | 30.790903000 | 13.440450000 |
| C            | 18.960712000 | 26.559942000 | 17.333342000 | H             | 9.530447000  | 26.880900000 | 17.350453000 |
| C            | 19.936757000 | 26.544889000 | 18.317452000 | H             | 13.440450000 | 22.970897000 | 9.530447000  |
| H            | 19.144577000 | 26.397044000 | 16.322082000 | H             | 9.530447000  | 22.970897000 | 13.440450000 |
| H            | 20.830009000 | 26.284144000 | 18.007515000 | H             | 13.440450000 | 22.970897000 | 17.350453000 |
| C            | 21.360638000 | 17.333342000 | 13.119492000 | H             | 15.026933000 | 25.294417000 | 11.853967000 |
| C            | 20.384593000 | 18.317452000 | 13.104439000 | H             | 11.853967000 | 28.467383000 | 11.853967000 |
| H            | 21.176773000 | 16.322082000 | 12.956594000 | H             | 9.530447000  | 26.880900000 | 9.530447000  |
| H            | 19.491341000 | 18.007515000 | 12.843694000 | H             | 15.026933000 | 28.467383000 | 15.026933000 |
| C            | 22.988008000 | 18.960712000 | 13.761408000 | H             | 11.853967000 | 25.294417000 | 15.026933000 |
| C            | 22.003898000 | 19.936757000 | 13.776461000 | H             | 26.222677000 | 23.803714000 | 20.950803000 |
| H            | 23.999268000 | 19.144577000 | 13.924306000 | H             | 26.598983000 | 19.394083000 | 16.487101000 |
| H            | 22.313835000 | 20.830009000 | 14.037206000 | H             | 27.302401000 | 19.276974000 | 22.459591000 |
| Zr           | 10.956924000 | 26.880900000 | 13.440450000 | H             | 26.598025000 | 17.783425000 | 21.099085000 |
| O            | 9.894590000  | 26.880900000 | 11.493735000 | H             | 27.256079000 | 21.105638000 | 24.129466000 |
| O            | 12.408223000 | 27.913127000 | 14.472677000 | H             | 26.690468000 | 16.125439000 | 19.262915000 |
| C            | 10.287052000 | 26.880900000 | 10.287052000 | Cu            | 26.068226000 | 21.926668000 | 18.267512000 |
| Zr           | 15.923976000 | 26.880900000 | 13.440450000 | Br            | 24.052617000 | 21.223229000 | 17.015108000 |
| O            | 16.986310000 | 26.880900000 | 11.493735000 | C             | 26.155241000 | 24.230650000 | 16.820933000 |
| C            | 16.593848000 | 26.880900000 | 10.287052000 | C             | 26.981045000 | 23.526686000 | 17.481377000 |
| O            | 16.986310000 | 26.880900000 | 15.387165000 | H             | 28.062767000 | 23.577099000 | 17.472783000 |
| O            | 14.472677000 | 27.913127000 | 12.408223000 | C             | 24.812260000 | 24.630115000 | 16.421163000 |
| C            | 16.593848000 | 26.880900000 | 16.593848000 | H             | 24.594786000 | 25.653064000 | 16.757672000 |
| C            | 17.650268000 | 26.880900000 | 17.650268000 | H             | 24.082116000 | 23.934034000 | 16.853126000 |
| C            | 19.634347000 | 26.880900000 | 19.634347000 | O             | 24.698601000 | 24.549136000 | 15.005633000 |
| O            | 9.894590000  | 26.880900000 | 15.387165000 | H             | 25.089120000 | 22.752727000 | 14.561961000 |
| C            | 10.287052000 | 26.880900000 | 16.593848000 | C             | 25.708743000 | 23.268348000 | 10.456910000 |
| Zr           | 13.440450000 | 26.880900000 | 15.923976000 | C             | 24.327424000 | 23.485549000 | 11.066695000 |
| O            | 11.493735000 | 26.880900000 | 16.986310000 | C             | 23.993138000 | 22.584239000 | 12.284876000 |
| O            | 14.472677000 | 27.913127000 | 14.472677000 | C             | 25.891935000 | 21.914228000 | 9.775377000  |
| Zr           | 13.440450000 | 26.880900000 | 10.956924000 | C             | 25.160372000 | 21.806076000 | 12.804640000 |
| O            | 11.493735000 | 26.880900000 | 9.894590000  | C             | 25.350807000 | 20.768546000 | 10.626505000 |
| O            | 15.387165000 | 26.880900000 | 9.894590000  | N             | 25.747284000 | 20.883274000 | 12.027799000 |
| O            | 12.408223000 | 27.913127000 | 12.408223000 | H             | 25.910983000 | 24.065999000 | 9.735915000  |
| O            | 15.387165000 | 26.880900000 | 16.986310000 | H             | 26.952983000 | 21.748813000 | 9.551508000  |
| Zr           | 13.440450000 | 29.364426000 | 13.440450000 | C             | 26.787488000 | 21.457239000 | 14.601903000 |
| O            | 11.493735000 | 30.426760000 | 13.440450000 | N             | 25.591381000 | 22.042034000 | 14.021736000 |
| C            | 10.287052000 | 30.034298000 | 13.440450000 | C             | 27.061870000 | 20.119008000 | 13.950305000 |
| O            | 15.387165000 | 30.426760000 | 13.440450000 | C             | 26.998941000 | 20.242677000 | 12.440774000 |
| C            | 16.593848000 | 30.034298000 | 13.440450000 | H             | 27.037026000 | 19.258032000 | 11.965702000 |
| O            | 16.986310000 | 28.827615000 | 13.440450000 | H             | 26.605388000 | 21.371098000 | 15.679055000 |
| O            | 9.894590000  | 28.827615000 | 13.440450000 | H             | 26.453624000 | 23.407124000 | 11.250871000 |
| C            | 22.671082000 | 26.880900000 | 22.671082000 | H             | 25.367135000 | 21.891506000 | 8.812183000  |
| C            | 20.687003000 | 26.880900000 | 20.687003000 | H             | 27.845320000 | 20.835181000 | 12.060975000 |
| C            | 21.360638000 | 27.201858000 | 22.988008000 | H             | 27.618943000 | 22.162141000 | 14.463620000 |
| C            | 20.384593000 | 27.216911000 | 22.003898000 | H             | 23.553090000 | 23.347845000 | 10.301432000 |
| H            | 21.176773000 | 27.364756000 | 23.999268000 | H             | 24.280031000 | 24.518970000 | 11.410980000 |
| H            | 19.491341000 | 27.477656000 | 22.313835000 | H             | 28.042093000 | 19.737893000 | 14.247820000 |
| O            | 13.440450000 | 28.827615000 | 16.986310000 | H             | 26.321010000 | 19.386402000 | 14.288322000 |
| C            | 13.440450000 | 30.034298000 | 16.593848000 | H             | 23.617094000 | 23.196196000 | 13.107915000 |
| O            | 13.440450000 | 28.827615000 | 9.894590000  | H             | 23.202985000 | 21.871558000 | 12.024821000 |
| C            | 13.440450000 | 30.034298000 | 10.287052000 | H             | 24.257185000 | 20.742659000 | 10.581162000 |
| O            | 13.440450000 | 30.426760000 | 15.387165000 | H             | 25.697412000 | 19.791632000 | 10.276005000 |
| O            | 13.440450000 | 30.426760000 | 11.493735000 | C             | 25.916203000 | 25.011772000 | 14.376321000 |
| C            | 17.333342000 | 27.201858000 | 18.960712000 | O             | 26.819056000 | 25.311464000 | 15.205770000 |
| C            | 18.317452000 | 27.216911000 | 19.936757000 | O             | 25.889183000 | 24.985768000 | 13.152249000 |
| H            | 16.322082000 | 27.364756000 | 19.144577000 | <b>h. IM2</b> |              |              |              |
| H            | 18.007515000 | 27.477656000 | 20.830009000 | N             | 26.651727000 | 21.838119000 | 20.413268000 |
| H            | 13.440450000 | 30.790903000 | 9.530447000  | N             | 26.501923000 | 19.924445000 | 18.482354000 |
| H            | 17.350453000 | 26.880900000 | 9.530447000  | C             | 26.654700000 | 20.545220000 | 20.826167000 |

## ARTICLE

## Journal Name

|    |              |              |              |   |              |              |              |
|----|--------------|--------------|--------------|---|--------------|--------------|--------------|
| C  | 26.634899000 | 22.827579000 | 21.325744000 | C | 30.008123000 | 16.567527000 | 13.254357000 |
| C  | 26.551603000 | 19.005049000 | 17.496071000 | O | 23.334855000 | 26.880866000 | 24.934215000 |
| C  | 26.677771000 | 19.510866000 | 19.771161000 | O | 23.334856000 | 24.934212000 | 26.880862000 |
| C  | 26.643067000 | 20.252883000 | 22.201831000 | O | 25.848909000 | 27.912895000 | 27.912897000 |
| C  | 26.697119000 | 22.622111000 | 22.708571000 | O | 23.334862000 | 26.880939000 | 28.827594000 |
| C  | 26.728100000 | 17.626372000 | 17.695017000 | O | 23.334864000 | 28.827596000 | 26.880937000 |
| C  | 26.885686000 | 18.150471000 | 20.051826000 | O | 24.934210000 | 30.426941000 | 26.880925000 |
| C  | 26.685650000 | 21.277698000 | 23.131782000 | O | 26.880889000 | 30.426939000 | 24.934203000 |
| C  | 26.891330000 | 17.215264000 | 19.031798000 | O | 26.880879000 | 30.426942000 | 28.827590000 |
| C  | 26.809925000 | 23.730886000 | 23.728973000 | O | 27.912786000 | 27.912776000 | 27.912777000 |
| C  | 26.809925000 | 16.592377000 | 16.590464000 | O | 28.827596000 | 30.426944000 | 26.880863000 |
| O  | 26.880885000 | 24.934153000 | 23.334955000 | O | 30.426933000 | 24.934198000 | 26.880924000 |
| O  | 26.880903000 | 23.334945000 | 24.934136000 | O | 30.426936000 | 26.880929000 | 24.934199000 |
| O  | 26.880903000 | 15.387214000 | 16.986405000 | O | 30.426944000 | 26.880866000 | 28.827595000 |
| O  | 26.880885000 | 16.986395000 | 15.387197000 | O | 30.426946000 | 28.827594000 | 26.880867000 |
| Zr | 26.878142000 | 26.881612000 | 24.237883000 | O | 24.934211000 | 26.880924000 | 30.426942000 |
| Zr | 26.878209000 | 24.239690000 | 26.880717000 | O | 26.880889000 | 24.934201000 | 30.426937000 |
| Zr | 26.878209000 | 13.440633000 | 16.081660000 | O | 26.880878000 | 28.827589000 | 30.426943000 |
| Zr | 26.878142000 | 16.083467000 | 13.439738000 | O | 28.827598000 | 26.880862000 | 30.426940000 |
| O  | 24.934203000 | 26.880849000 | 23.334882000 | O | 25.848909000 | 12.408453000 | 12.408455000 |
| O  | 25.848911000 | 25.848918000 | 25.848917000 | O | 23.334862000 | 11.493756000 | 13.440411000 |
| O  | 25.849015000 | 27.912768000 | 25.849028000 | O | 23.334855000 | 15.387135000 | 13.440484000 |
| O  | 27.912782000 | 25.849032000 | 25.849031000 | O | 23.334864000 | 13.440413000 | 11.493754000 |
| O  | 27.912889000 | 27.912886000 | 25.848919000 | O | 23.334856000 | 13.440488000 | 15.387138000 |
| O  | 26.880945000 | 28.827581000 | 23.334856000 | O | 24.934211000 | 9.894408000  | 13.440426000 |
| O  | 28.827591000 | 26.880922000 | 23.334870000 | O | 26.880889000 | 9.894413000  | 15.387149000 |
| O  | 24.934197000 | 23.334881000 | 26.880846000 | O | 27.912786000 | 12.408573000 | 12.408574000 |
| O  | 25.849012000 | 25.849025000 | 27.912771000 | O | 26.880878000 | 9.894407000  | 11.493761000 |
| O  | 27.912892000 | 25.848913000 | 27.912887000 | O | 28.827598000 | 9.894410000  | 13.440488000 |
| O  | 26.880944000 | 23.334850000 | 28.827576000 | O | 30.426944000 | 11.493755000 | 13.440484000 |
| O  | 28.827591000 | 23.334868000 | 26.880917000 | O | 30.426936000 | 15.387151000 | 13.440421000 |
| O  | 25.849012000 | 12.408579000 | 14.472325000 | O | 30.426946000 | 13.440483000 | 11.493756000 |
| O  | 25.848911000 | 14.472433000 | 14.472432000 | O | 30.426933000 | 13.440426000 | 15.387152000 |
| O  | 24.934197000 | 13.440504000 | 16.986469000 | O | 24.934210000 | 13.440425000 | 9.894409000  |
| O  | 26.880944000 | 11.493774000 | 16.986500000 | O | 26.880879000 | 11.493760000 | 9.894408000  |
| O  | 27.912892000 | 12.408463000 | 14.472437000 | O | 26.880889000 | 15.387147000 | 9.894411000  |
| O  | 27.912782000 | 14.472319000 | 14.472318000 | O | 28.827596000 | 13.440487000 | 9.894406000  |
| O  | 28.827591000 | 13.440433000 | 16.986482000 | C | 23.753697000 | 27.066116000 | 30.007949000 |
| O  | 25.849015000 | 14.472322000 | 12.408582000 | C | 23.753135000 | 30.008630000 | 27.063604000 |
| O  | 24.934203000 | 16.986468000 | 13.440501000 | C | 26.696398000 | 30.008246000 | 30.008106000 |
| O  | 27.912889000 | 14.472431000 | 12.408464000 | C | 30.007968000 | 30.008237000 | 26.695581000 |
| O  | 26.880945000 | 16.986494000 | 11.493769000 | C | 30.008286000 | 26.697416000 | 30.008420000 |
| O  | 28.827591000 | 16.986480000 | 13.440428000 | C | 23.753697000 | 10.313401000 | 13.255234000 |
| C  | 23.755332000 | 26.686089000 | 23.755213000 | C | 23.753135000 | 13.257746000 | 10.312720000 |
| Zr | 24.236612000 | 26.881475000 | 26.880552000 | C | 26.696398000 | 10.313244000 | 10.313104000 |
| Zr | 26.880671000 | 29.524609000 | 26.880680000 | C | 30.008286000 | 10.312930000 | 13.623934000 |
| Zr | 29.524440000 | 26.882357000 | 26.881381000 | C | 30.007968000 | 13.625768000 | 10.313113000 |
| C  | 27.064326000 | 30.008530000 | 23.753165000 | H | 27.351814000 | 30.759513000 | 23.002127000 |
| C  | 30.008123000 | 27.066993000 | 23.753823000 | H | 30.758179000 | 27.358190000 | 23.003211000 |
| C  | 23.755714000 | 23.756676000 | 26.684338000 | H | 23.008991000 | 23.009158000 | 26.377462000 |
| Zr | 26.880615000 | 26.881402000 | 29.524137000 | H | 27.355985000 | 23.003402000 | 30.758391000 |
| C  | 27.065914000 | 23.754135000 | 30.008060000 | H | 30.757581000 | 23.004153000 | 27.359935000 |
| C  | 30.007964000 | 23.754748000 | 27.067567000 | H | 23.008991000 | 13.943888000 | 17.312192000 |
| Zr | 24.236612000 | 13.440798000 | 13.439875000 | H | 27.355985000 | 9.562959000  | 17.317948000 |
| Zr | 26.880615000 | 10.797213000 | 13.439948000 | H | 30.757582000 | 12.961415000 | 17.317197000 |
| C  | 23.755714000 | 13.637012000 | 16.564674000 | H | 27.351814000 | 17.319223000 | 9.561837000  |
| C  | 27.065914000 | 10.313290000 | 16.567215000 | H | 30.758179000 | 17.318139000 | 12.963160000 |
| Zr | 29.524440000 | 13.439969000 | 13.438993000 | H | 23.003255000 | 27.356162000 | 30.758555000 |
| C  | 30.007964000 | 13.253783000 | 16.566602000 | H | 23.001913000 | 30.759916000 | 27.349810000 |
| Zr | 26.880671000 | 13.440670000 | 10.796741000 | H | 26.407446000 | 30.758917000 | 30.758911000 |
| C  | 23.755332000 | 16.566137000 | 13.635261000 | H | 30.758582000 | 30.758588000 | 26.405278000 |
| C  | 27.064326000 | 16.568185000 | 10.312820000 | H | 30.759373000 | 26.409850000 | 30.759355000 |

| Journal Name |              |              |              | ARTICLE |              |              |              |
|--------------|--------------|--------------|--------------|---------|--------------|--------------|--------------|
| H            | 23.003255000 | 9.562795000  | 12.965188000 | Zr      | 15.923976000 | 26.880900000 | 13.440450000 |
| H            | 23.001913000 | 12.971540000 | 9.561434000  | O       | 16.986310000 | 26.880900000 | 11.493735000 |
| H            | 26.407446000 | 9.562439000  | 9.562434000  | C       | 16.593848000 | 26.880900000 | 10.287052000 |
| H            | 30.759373000 | 9.561995000  | 13.911500000 | O       | 16.986310000 | 26.880900000 | 15.387165000 |
| H            | 30.758582000 | 13.916071000 | 9.562782000  | O       | 14.472677000 | 27.913127000 | 12.408223000 |
| H            | 25.215026000 | 11.776433000 | 15.102845000 | C       | 16.593848000 | 26.880900000 | 16.593848000 |
| H            | 28.544134000 | 11.776251000 | 11.775822000 | C       | 17.650268000 | 26.880900000 | 17.650268000 |
| H            | 28.555271000 | 15.099035000 | 15.098322000 | C       | 19.634347000 | 26.880900000 | 19.634347000 |
| H            | 25.215244000 | 15.103495000 | 11.776660000 | O       | 9.894590000  | 26.880900000 | 15.387165000 |
| H            | 25.215244000 | 28.544690000 | 25.217855000 | C       | 10.287052000 | 26.880900000 | 16.593848000 |
| H            | 28.555271000 | 25.223028000 | 25.222315000 | Zr      | 13.440450000 | 26.880900000 | 15.923976000 |
| H            | 28.544134000 | 28.545528000 | 28.545099000 | O       | 11.493735000 | 26.880900000 | 16.986310000 |
| H            | 25.215026000 | 25.218505000 | 28.544917000 | O       | 14.472677000 | 27.913127000 | 14.472677000 |
| O            | 14.472677000 | 25.848673000 | 14.472677000 | Zr      | 13.440450000 | 26.880900000 | 10.956924000 |
| O            | 12.408223000 | 25.848673000 | 12.408223000 | O       | 11.493735000 | 26.880900000 | 9.894590000  |
| O            | 14.472677000 | 25.848673000 | 12.408223000 | O       | 15.387165000 | 26.880900000 | 9.894590000  |
| O            | 12.408223000 | 25.848673000 | 14.472677000 | O       | 12.408223000 | 27.913127000 | 12.408223000 |
| Zr           | 13.440450000 | 24.397374000 | 13.440450000 | O       | 15.387165000 | 26.880900000 | 16.986310000 |
| O            | 11.493735000 | 23.335040000 | 13.440450000 | Zr      | 13.440450000 | 29.364426000 | 13.440450000 |
| C            | 10.287052000 | 23.727502000 | 13.440450000 | O       | 11.493735000 | 30.426760000 | 13.440450000 |
| O            | 15.387165000 | 23.335040000 | 13.440450000 | C       | 10.287052000 | 30.034298000 | 13.440450000 |
| C            | 16.593848000 | 23.727502000 | 13.440450000 | O       | 15.387165000 | 30.426760000 | 13.440450000 |
| C            | 17.650268000 | 22.671082000 | 13.440450000 | C       | 16.593848000 | 30.034298000 | 13.440450000 |
| C            | 19.634347000 | 20.687003000 | 13.440450000 | O       | 16.986310000 | 28.827615000 | 13.440450000 |
| C            | 18.960712000 | 22.988008000 | 13.761408000 | O       | 9.894590000  | 28.827615000 | 13.440450000 |
| C            | 19.936757000 | 22.003898000 | 13.776461000 | C       | 22.671082000 | 26.880900000 | 22.671082000 |
| H            | 19.144577000 | 23.999268000 | 13.924306000 | C       | 20.687003000 | 26.880900000 | 20.687003000 |
| H            | 20.830009000 | 22.313835000 | 14.037206000 | C       | 21.360638000 | 27.201858000 | 22.988008000 |
| O            | 9.894590000  | 24.934185000 | 13.440450000 | C       | 20.384593000 | 27.216911000 | 22.003898000 |
| O            | 16.986310000 | 24.934185000 | 13.440450000 | H       | 21.176773000 | 27.364756000 | 23.999268000 |
| C            | 17.333342000 | 21.360638000 | 13.119492000 | H       | 19.491341000 | 27.477656000 | 22.313835000 |
| C            | 18.317452000 | 20.384593000 | 13.104439000 | O       | 13.440450000 | 28.827615000 | 16.986310000 |
| H            | 16.322082000 | 21.176773000 | 12.956594000 | C       | 13.440450000 | 30.034298000 | 16.593848000 |
| H            | 18.007515000 | 19.491341000 | 12.843694000 | O       | 13.440450000 | 28.827615000 | 9.894590000  |
| C            | 22.988008000 | 26.559942000 | 21.360638000 | C       | 13.440450000 | 30.034298000 | 10.287052000 |
| C            | 22.003898000 | 26.544889000 | 20.384593000 | O       | 13.440450000 | 30.426760000 | 15.387165000 |
| H            | 23.999268000 | 26.397044000 | 21.176773000 | O       | 13.440450000 | 30.426760000 | 11.493735000 |
| H            | 22.313835000 | 26.284144000 | 19.491341000 | C       | 17.333342000 | 27.201858000 | 18.960712000 |
| C            | 22.671082000 | 17.650268000 | 13.440450000 | C       | 18.317452000 | 27.216911000 | 19.936757000 |
| C            | 20.687003000 | 19.634347000 | 13.440450000 | H       | 16.322082000 | 27.364756000 | 19.144577000 |
| O            | 13.440450000 | 24.934185000 | 9.894590000  | H       | 18.007515000 | 27.477656000 | 20.830009000 |
| C            | 13.440450000 | 23.727502000 | 10.287052000 | H       | 13.440450000 | 30.790903000 | 9.530447000  |
| O            | 13.440450000 | 24.934185000 | 16.986310000 | H       | 17.350453000 | 26.880900000 | 9.530447000  |
| C            | 13.440450000 | 23.727502000 | 16.593848000 | H       | 17.350453000 | 30.790903000 | 13.440450000 |
| O            | 13.440450000 | 23.335040000 | 15.387165000 | H       | 13.440450000 | 30.790903000 | 17.350453000 |
| O            | 13.440450000 | 23.335040000 | 11.493735000 | H       | 9.530447000  | 30.790903000 | 13.440450000 |
| C            | 18.960712000 | 26.559942000 | 17.333342000 | H       | 9.530447000  | 26.880900000 | 17.350453000 |
| C            | 19.936757000 | 26.544889000 | 18.317452000 | H       | 13.440450000 | 22.970897000 | 9.530447000  |
| H            | 19.144577000 | 26.397044000 | 16.322082000 | H       | 9.530447000  | 22.970897000 | 13.440450000 |
| H            | 20.830009000 | 26.284144000 | 18.007515000 | H       | 13.440450000 | 22.970897000 | 17.350453000 |
| C            | 21.360638000 | 17.333342000 | 13.119492000 | H       | 15.026933000 | 25.294417000 | 11.853967000 |
| C            | 20.384593000 | 18.317452000 | 13.104439000 | H       | 11.853967000 | 28.467383000 | 11.853967000 |
| H            | 21.176773000 | 16.322082000 | 12.956594000 | H       | 9.530447000  | 26.880900000 | 9.530447000  |
| H            | 19.491341000 | 18.007515000 | 12.843694000 | H       | 15.026933000 | 28.467383000 | 15.026933000 |
| C            | 22.988008000 | 18.960712000 | 13.761408000 | H       | 11.853967000 | 25.294417000 | 15.026933000 |
| C            | 22.003898000 | 19.936757000 | 13.776461000 | H       | 26.567262000 | 23.835577000 | 20.920775000 |
| H            | 23.999268000 | 19.144577000 | 13.924306000 | H       | 26.437468000 | 19.396672000 | 16.486679000 |
| H            | 22.313835000 | 20.830009000 | 14.037206000 | H       | 26.595635000 | 19.224130000 | 22.545257000 |
| Zr           | 10.956924000 | 26.880900000 | 13.440450000 | H       | 27.057994000 | 17.824887000 | 21.072963000 |
| O            | 9.894590000  | 26.880900000 | 11.493735000 | H       | 26.704809000 | 21.061020000 | 24.194702000 |
| O            | 12.408223000 | 27.913127000 | 14.472677000 | H       | 27.046437000 | 16.162718000 | 19.244032000 |
| C            | 10.287052000 | 26.880900000 | 10.287052000 | Cu      | 26.562106000 | 22.125428000 | 18.325843000 |

## ARTICLE

## Journal Name

|               |              |              |              |    |              |              |              |
|---------------|--------------|--------------|--------------|----|--------------|--------------|--------------|
| Br            | 24.398571000 | 23.484048000 | 18.620640000 | O  | 24.934203000 | 26.880849000 | 23.334882000 |
| C             | 28.353794000 | 24.137105000 | 17.476355000 | O  | 25.848911000 | 25.848918000 | 25.848917000 |
| C             | 27.797554000 | 22.985619000 | 17.095036000 | O  | 25.849015000 | 27.912768000 | 25.849028000 |
| H             | 28.071947000 | 22.670150000 | 16.080555000 | O  | 27.912782000 | 25.849032000 | 25.849031000 |
| C             | 28.253978000 | 24.856349000 | 18.783298000 | O  | 27.912889000 | 27.912886000 | 25.848919000 |
| H             | 28.897098000 | 24.433986000 | 19.567719000 | O  | 26.880945000 | 28.827581000 | 23.334856000 |
| H             | 27.223028000 | 24.896324000 | 19.162239000 | O  | 28.827591000 | 26.880922000 | 23.334870000 |
| O             | 28.711798000 | 26.188483000 | 18.487527000 | O  | 24.934197000 | 23.334881000 | 26.880846000 |
| H             | 26.408738000 | 24.424830000 | 16.345137000 | O  | 25.849012000 | 25.849025000 | 27.912771000 |
| C             | 25.154288000 | 28.451988000 | 15.513399000 | O  | 27.912892000 | 25.848913000 | 27.912887000 |
| C             | 25.760772000 | 28.063455000 | 16.859346000 | O  | 26.880944000 | 23.334850000 | 28.827576000 |
| C             | 25.503141000 | 26.600879000 | 17.299321000 | O  | 28.827591000 | 23.334868000 | 26.880917000 |
| C             | 23.627579000 | 28.472581000 | 15.498247000 | O  | 25.849012000 | 12.408579000 | 14.472325000 |
| C             | 24.895398000 | 25.721519000 | 16.256255000 | O  | 25.848911000 | 14.472433000 | 14.472432000 |
| C             | 23.022338000 | 27.251587000 | 16.184320000 | O  | 24.934197000 | 13.440504000 | 16.986469000 |
| N             | 23.677542000 | 26.005256000 | 15.790045000 | O  | 26.880944000 | 11.493774000 | 16.986500000 |
| H             | 25.532401000 | 29.433907000 | 15.213943000 | O  | 27.912892000 | 12.408463000 | 14.472437000 |
| H             | 23.268176000 | 28.540349000 | 14.464570000 | O  | 27.912782000 | 14.472319000 | 14.472318000 |
| C             | 25.025432000 | 23.633412000 | 14.977027000 | O  | 28.827591000 | 13.440433000 | 16.986482000 |
| N             | 25.595606000 | 24.707755000 | 15.782095000 | O  | 25.849015000 | 14.472322000 | 12.408582000 |
| C             | 23.513844000 | 23.715967000 | 14.985753000 | O  | 24.934203000 | 16.986468000 | 13.440501000 |
| C             | 23.060354000 | 25.147556000 | 14.781023000 | O  | 27.912889000 | 14.472431000 | 12.408464000 |
| H             | 21.975894000 | 25.236612000 | 14.894393000 | O  | 26.880945000 | 16.986494000 | 11.493769000 |
| H             | 25.368267000 | 22.695064000 | 15.429149000 | O  | 28.827591000 | 16.986480000 | 13.440428000 |
| H             | 25.516434000 | 27.755160000 | 14.744990000 | C  | 23.755332000 | 26.686089000 | 23.755213000 |
| H             | 23.252006000 | 29.363759000 | 16.015002000 | Zr | 24.236612000 | 26.881475000 | 26.880552000 |
| H             | 23.317624000 | 25.515406000 | 13.776096000 | Zr | 26.880671000 | 29.524609000 | 26.880680000 |
| H             | 25.435324000 | 23.692544000 | 13.961241000 | Zr | 29.524440000 | 26.882357000 | 26.881381000 |
| H             | 25.391126000 | 28.738964000 | 17.639356000 | C  | 27.064326000 | 30.008530000 | 23.753165000 |
| H             | 26.842384000 | 28.220298000 | 16.815345000 | C  | 30.008123000 | 27.066993000 | 23.753823000 |
| H             | 23.103477000 | 23.084031000 | 14.197760000 | C  | 23.755714000 | 23.756676000 | 26.684338000 |
| H             | 23.151291000 | 23.361611000 | 15.956948000 | Zr | 26.880615000 | 26.881402000 | 29.524137000 |
| H             | 26.435605000 | 26.135590000 | 17.616390000 | C  | 27.065914000 | 23.754135000 | 30.008060000 |
| H             | 24.846561000 | 26.536036000 | 18.174316000 | C  | 30.007964000 | 23.754748000 | 27.067567000 |
| H             | 23.093934000 | 27.346562000 | 17.272640000 | Zr | 24.236612000 | 13.440798000 | 13.439875000 |
| H             | 21.960670000 | 27.147084000 | 15.948826000 | Zr | 26.880615000 | 10.797213000 | 13.439948000 |
| C             | 29.282822000 | 26.197674000 | 17.253770000 | C  | 23.755714000 | 13.637012000 | 16.564674000 |
| O             | 29.172722000 | 24.985261000 | 16.665905000 | C  | 27.065914000 | 10.313290000 | 16.567215000 |
| O             | 29.785836000 | 27.167009000 | 16.755914000 | Zr | 29.524440000 | 13.439969000 | 13.438993000 |
| <b>i. TS3</b> |              |              |              | C  | 30.007964000 | 13.253783000 | 16.566602000 |
| N             | 26.886316000 | 21.844394000 | 20.416933000 | Zr | 26.880671000 | 13.440670000 | 10.796741000 |
| N             | 26.625729000 | 19.934988000 | 18.469953000 | C  | 23.755332000 | 16.566137000 | 13.635261000 |
| C             | 26.685016000 | 20.561922000 | 20.815924000 | C  | 27.064326000 | 16.568185000 | 10.312820000 |
| C             | 26.861996000 | 22.834927000 | 21.333128000 | C  | 30.008123000 | 16.567527000 | 13.254357000 |
| C             | 26.672870000 | 19.010863000 | 17.491648000 | O  | 23.334855000 | 26.880866000 | 24.934215000 |
| C             | 26.711581000 | 19.521160000 | 19.764892000 | O  | 23.334856000 | 24.934212000 | 26.880862000 |
| C             | 26.458872000 | 20.278109000 | 22.173886000 | O  | 25.848909000 | 27.912895000 | 27.912897000 |
| C             | 26.709406000 | 22.625507000 | 22.705444000 | O  | 23.334862000 | 26.880939000 | 28.827594000 |
| C             | 26.743205000 | 17.624623000 | 17.698357000 | O  | 23.334864000 | 28.827596000 | 26.880937000 |
| C             | 26.824410000 | 18.152159000 | 20.059163000 | O  | 24.934210000 | 30.426941000 | 26.880925000 |
| C             | 26.494684000 | 21.295566000 | 23.113360000 | O  | 26.880889000 | 30.426939000 | 24.934203000 |
| C             | 26.818845000 | 17.212325000 | 19.041253000 | O  | 26.880879000 | 30.426942000 | 28.827590000 |
| C             | 26.809925000 | 23.730886000 | 23.728973000 | O  | 27.912786000 | 27.912776000 | 27.912777000 |
| C             | 26.809925000 | 16.592377000 | 16.590464000 | O  | 28.827596000 | 30.426944000 | 26.880863000 |
| O             | 26.880885000 | 24.934153000 | 23.334955000 | O  | 30.426933000 | 24.934198000 | 26.880924000 |
| O             | 26.880903000 | 23.334945000 | 24.934136000 | O  | 30.426936000 | 26.880929000 | 24.934199000 |
| O             | 26.880903000 | 15.387214000 | 16.986405000 | O  | 30.426944000 | 26.880866000 | 28.827595000 |
| O             | 26.880885000 | 16.986395000 | 15.387197000 | O  | 30.426946000 | 28.827594000 | 26.880867000 |
| Zr            | 26.878142000 | 26.881612000 | 24.237883000 | O  | 24.934211000 | 26.880924000 | 30.426942000 |
| Zr            | 26.878209000 | 24.239690000 | 26.880717000 | O  | 26.880889000 | 24.934201000 | 30.426937000 |
| Zr            | 26.878209000 | 13.440633000 | 16.081660000 | O  | 26.880878000 | 28.827589000 | 30.426943000 |
| Zr            | 26.878142000 | 16.083467000 | 13.439738000 | O  | 28.827598000 | 26.880862000 | 30.426940000 |



|    |              |              |              |    |              |              |              |
|----|--------------|--------------|--------------|----|--------------|--------------|--------------|
| O  | 25.848909000 | 12.408453000 | 12.408455000 | C  | 10.287052000 | 23.727502000 | 13.440450000 |
| O  | 23.334862000 | 11.493756000 | 13.440411000 | O  | 15.387165000 | 23.335040000 | 13.440450000 |
| O  | 23.334855000 | 15.387135000 | 13.440484000 | C  | 16.593848000 | 23.727502000 | 13.440450000 |
| O  | 23.334864000 | 13.440413000 | 11.493754000 | C  | 17.650268000 | 22.671082000 | 13.440450000 |
| O  | 23.334856000 | 13.440488000 | 15.387138000 | C  | 19.634347000 | 20.687003000 | 13.440450000 |
| O  | 24.934211000 | 9.894408000  | 13.440426000 | C  | 18.960712000 | 22.988008000 | 13.761408000 |
| O  | 26.880889000 | 9.894413000  | 15.387149000 | C  | 19.936757000 | 22.003898000 | 13.776461000 |
| O  | 27.912786000 | 12.408573000 | 12.408574000 | H  | 19.144577000 | 23.999268000 | 13.924306000 |
| O  | 26.880878000 | 9.894407000  | 11.493761000 | H  | 20.830009000 | 22.313835000 | 14.037206000 |
| O  | 28.827598000 | 9.894410000  | 13.440488000 | O  | 9.894590000  | 24.934185000 | 13.440450000 |
| O  | 30.426944000 | 11.493755000 | 13.440484000 | O  | 16.986310000 | 24.934185000 | 13.440450000 |
| O  | 30.426936000 | 15.387151000 | 13.440421000 | C  | 17.333342000 | 21.360638000 | 13.119492000 |
| O  | 30.426946000 | 13.440483000 | 11.493756000 | C  | 18.317452000 | 20.384593000 | 13.104439000 |
| O  | 30.426933000 | 13.440426000 | 15.387152000 | H  | 16.322082000 | 21.176773000 | 12.956594000 |
| O  | 24.934210000 | 13.440425000 | 9.894409000  | H  | 18.007515000 | 19.491341000 | 12.843694000 |
| O  | 26.880879000 | 11.493760000 | 9.894408000  | C  | 22.988008000 | 26.559942000 | 21.360638000 |
| O  | 26.880889000 | 15.387147000 | 9.894411000  | C  | 22.003898000 | 26.544889000 | 20.384593000 |
| O  | 28.827596000 | 13.440487000 | 9.894406000  | H  | 23.999268000 | 26.397044000 | 21.176773000 |
| C  | 23.753697000 | 27.066116000 | 30.007949000 | H  | 22.313835000 | 26.284144000 | 19.491341000 |
| C  | 23.753135000 | 30.008630000 | 27.063604000 | C  | 22.671082000 | 17.650268000 | 13.440450000 |
| C  | 26.696398000 | 30.008246000 | 30.008106000 | C  | 20.687003000 | 19.634347000 | 13.440450000 |
| C  | 30.007968000 | 30.008237000 | 26.695581000 | O  | 13.440450000 | 24.934185000 | 9.894590000  |
| C  | 30.008286000 | 26.697416000 | 30.008420000 | C  | 13.440450000 | 23.727502000 | 10.287052000 |
| C  | 23.753697000 | 10.313401000 | 13.255234000 | O  | 13.440450000 | 24.934185000 | 16.986310000 |
| C  | 23.753135000 | 13.257746000 | 10.312720000 | C  | 13.440450000 | 23.727502000 | 16.593848000 |
| C  | 26.696398000 | 10.313244000 | 10.313104000 | O  | 13.440450000 | 23.335040000 | 15.387165000 |
| C  | 30.008286000 | 10.312930000 | 13.623934000 | O  | 13.440450000 | 23.335040000 | 11.493735000 |
| C  | 30.007968000 | 13.625768000 | 10.313113000 | C  | 18.960712000 | 26.559942000 | 17.333342000 |
| H  | 27.351814000 | 30.759513000 | 23.002127000 | C  | 19.936757000 | 26.544889000 | 18.317452000 |
| H  | 30.758179000 | 27.358190000 | 23.003211000 | H  | 19.144577000 | 26.397044000 | 16.322082000 |
| H  | 23.008991000 | 23.009158000 | 26.377462000 | H  | 20.830009000 | 26.284144000 | 18.007515000 |
| H  | 27.355985000 | 23.003402000 | 30.758391000 | C  | 21.360638000 | 17.333342000 | 13.119492000 |
| H  | 30.757581000 | 23.004153000 | 27.359935000 | C  | 20.384593000 | 18.317452000 | 13.104439000 |
| H  | 23.008991000 | 13.943888000 | 17.312192000 | H  | 21.176773000 | 16.322082000 | 12.956594000 |
| H  | 27.355985000 | 9.562959000  | 17.317948000 | H  | 19.491341000 | 18.007515000 | 12.843694000 |
| H  | 30.757582000 | 12.961415000 | 17.317197000 | C  | 22.988008000 | 18.960712000 | 13.761408000 |
| H  | 27.351814000 | 17.319223000 | 9.561837000  | C  | 22.003898000 | 19.936757000 | 13.776461000 |
| H  | 30.758179000 | 17.318139000 | 12.963160000 | H  | 23.999268000 | 19.144577000 | 13.924306000 |
| H  | 23.003255000 | 27.356162000 | 30.758555000 | H  | 22.313835000 | 20.830009000 | 14.037206000 |
| H  | 23.001913000 | 30.759916000 | 27.349810000 | Zr | 10.956924000 | 26.880900000 | 13.440450000 |
| H  | 26.407446000 | 30.758917000 | 30.758911000 | O  | 9.894590000  | 26.880900000 | 11.493735000 |
| H  | 30.758582000 | 30.758568000 | 26.405278000 | O  | 12.408223000 | 27.913127000 | 14.472677000 |
| H  | 30.759373000 | 26.409850000 | 30.759355000 | C  | 10.287052000 | 26.880900000 | 10.287052000 |
| H  | 23.003255000 | 9.562795000  | 12.965188000 | Zr | 15.923976000 | 26.880900000 | 13.440450000 |
| H  | 23.001913000 | 12.971540000 | 9.561434000  | O  | 16.986310000 | 26.880900000 | 11.493735000 |
| H  | 26.407446000 | 9.562439000  | 9.562434000  | C  | 16.593848000 | 26.880900000 | 10.287052000 |
| H  | 30.759373000 | 9.561995000  | 13.911500000 | O  | 16.986310000 | 26.880900000 | 15.387165000 |
| H  | 30.758582000 | 13.916071000 | 9.562782000  | O  | 14.472677000 | 27.913127000 | 12.408223000 |
| H  | 25.215026000 | 11.776433000 | 15.102845000 | C  | 16.593848000 | 26.880900000 | 16.593848000 |
| H  | 28.544134000 | 11.776251000 | 11.775822000 | C  | 17.650268000 | 26.880900000 | 17.650268000 |
| H  | 28.555271000 | 15.099035000 | 15.098322000 | C  | 19.634347000 | 26.880900000 | 19.634347000 |
| H  | 25.215244000 | 15.103495000 | 11.776660000 | O  | 9.894590000  | 26.880900000 | 15.387165000 |
| H  | 25.215244000 | 28.544690000 | 25.217855000 | C  | 10.287052000 | 26.880900000 | 16.593848000 |
| H  | 28.555271000 | 25.223028000 | 25.222315000 | Zr | 13.440450000 | 26.880900000 | 15.923976000 |
| H  | 28.544134000 | 28.545528000 | 28.545099000 | O  | 11.493735000 | 26.880900000 | 16.986310000 |
| H  | 25.215026000 | 25.218505000 | 28.544917000 | O  | 14.472677000 | 27.913127000 | 14.472677000 |
| O  | 14.472677000 | 25.848673000 | 14.472677000 | Zr | 13.440450000 | 26.880900000 | 10.956924000 |
| O  | 12.408223000 | 25.848673000 | 12.408223000 | O  | 11.493735000 | 26.880900000 | 9.894590000  |
| O  | 14.472677000 | 25.848673000 | 12.408223000 | O  | 15.387165000 | 26.880900000 | 9.894590000  |
| O  | 12.408223000 | 25.848673000 | 14.472677000 | O  | 12.408223000 | 27.913127000 | 12.408223000 |
| Zr | 13.440450000 | 24.397374000 | 13.440450000 | O  | 15.387165000 | 26.880900000 | 16.986310000 |
| O  | 11.493735000 | 23.335040000 | 13.440450000 | Zr | 13.440450000 | 29.364426000 | 13.440450000 |

| ARTICLE | Journal Name |              |              |                  |              |              |              |
|---------|--------------|--------------|--------------|------------------|--------------|--------------|--------------|
| O       | 11.493735000 | 30.426760000 | 13.440450000 | N                | 25.478730000 | 22.935571000 | 15.508853000 |
| C       | 10.287052000 | 30.034298000 | 13.440450000 | C                | 24.025508000 | 21.253537000 | 16.543138000 |
| O       | 15.387165000 | 30.426760000 | 13.440450000 | C                | 22.901475000 | 22.273584000 | 16.576441000 |
| C       | 16.593848000 | 30.034298000 | 13.440450000 | H                | 22.651524000 | 22.500704000 | 17.621258000 |
| O       | 16.986310000 | 28.827615000 | 13.440450000 | H                | 25.881792000 | 20.914325000 | 15.463331000 |
| O       | 9.894590000  | 28.827615000 | 13.440450000 | H                | 23.125659000 | 24.578714000 | 13.559589000 |
| C       | 22.671082000 | 26.880900000 | 22.671082000 | H                | 22.032594000 | 26.644633000 | 15.526375000 |
| C       | 20.687003000 | 26.880900000 | 20.687003000 | H                | 21.989043000 | 21.913537000 | 16.090135000 |
| C       | 21.360638000 | 27.201858000 | 22.988008000 | H                | 24.549955000 | 21.435056000 | 14.436535000 |
| C       | 20.384593000 | 27.216911000 | 22.003898000 | H                | 24.594484000 | 27.062743000 | 14.548961000 |
| H       | 21.176773000 | 27.364756000 | 23.999268000 | H                | 25.221810000 | 25.730020000 | 13.594205000 |
| H       | 19.491341000 | 27.477656000 | 22.313835000 | H                | 23.622240000 | 20.240539000 | 16.444425000 |
| O       | 13.440450000 | 28.827615000 | 16.986310000 | H                | 24.570995000 | 21.295918000 | 17.492832000 |
| C       | 13.440450000 | 30.034298000 | 16.593848000 | H                | 26.076945000 | 25.324917000 | 15.771123000 |
| O       | 13.440450000 | 28.827615000 | 9.894590000  | H                | 24.591806000 | 25.808834000 | 16.579760000 |
| C       | 13.440450000 | 30.034298000 | 10.287052000 | H                | 22.717141000 | 25.140417000 | 17.168365000 |
| O       | 13.440450000 | 30.426760000 | 15.387165000 | H                | 21.401880000 | 24.163907000 | 16.547678000 |
| O       | 13.440450000 | 30.426760000 | 11.493735000 | C                | 30.210855000 | 25.407667000 | 17.183612000 |
| C       | 17.333342000 | 27.201858000 | 18.960712000 | O                | 29.825301000 | 24.155878000 | 16.776430000 |
| C       | 18.317452000 | 27.216911000 | 19.936757000 | O                | 31.281349000 | 25.888516000 | 16.959174000 |
| H       | 16.322082000 | 27.364756000 | 19.144577000 | <b>j. PC/DBU</b> |              |              |              |
| H       | 18.007515000 | 27.477656000 | 20.830009000 | N                | 26.671414000 | 21.866639000 | 20.402508000 |
| H       | 13.440450000 | 30.790903000 | 9.530447000  | N                | 26.490087000 | 19.914921000 | 18.462769000 |
| H       | 17.350453000 | 26.880900000 | 9.530447000  | C                | 26.639050000 | 20.570616000 | 20.800373000 |
| H       | 17.350453000 | 30.790903000 | 13.440450000 | C                | 26.680659000 | 22.847315000 | 21.323171000 |
| H       | 13.440450000 | 30.790903000 | 17.350453000 | C                | 26.530830000 | 19.002444000 | 17.482041000 |
| H       | 9.530447000  | 30.790903000 | 13.440450000 | C                | 26.655426000 | 19.517264000 | 19.743376000 |
| H       | 9.530447000  | 26.880900000 | 17.350453000 | C                | 26.615881000 | 20.268034000 | 22.168935000 |
| H       | 13.440450000 | 22.970897000 | 9.530447000  | C                | 26.699488000 | 22.624563000 | 22.703947000 |
| H       | 9.530447000  | 22.970897000 | 13.440450000 | C                | 26.719197000 | 17.625646000 | 17.692842000 |
| H       | 13.440450000 | 22.970897000 | 17.350453000 | C                | 26.862391000 | 18.164868000 | 20.046441000 |
| H       | 15.026933000 | 25.294417000 | 11.853967000 | C                | 26.662101000 | 21.284332000 | 23.112509000 |
| H       | 11.853967000 | 28.467383000 | 11.853967000 | C                | 26.884725000 | 17.225702000 | 19.025394000 |
| H       | 9.530447000  | 26.880900000 | 9.530447000  | C                | 26.809925000 | 23.730886000 | 23.728973000 |
| H       | 15.026933000 | 28.467383000 | 15.026933000 | C                | 26.809925000 | 16.592377000 | 16.590464000 |
| H       | 11.853967000 | 25.294417000 | 15.026933000 | O                | 26.880885000 | 24.934153000 | 23.334955000 |
| H       | 26.969492000 | 23.842950000 | 20.941926000 | O                | 26.880903000 | 23.334945000 | 24.934136000 |
| H       | 26.646956000 | 19.397257000 | 16.474217000 | O                | 26.880903000 | 15.387214000 | 16.986405000 |
| H       | 26.241225000 | 19.262887000 | 22.491018000 | O                | 26.880885000 | 16.986395000 | 15.387197000 |
| H       | 26.935390000 | 17.824478000 | 21.088157000 | Zr               | 26.878142000 | 26.881612000 | 24.237883000 |
| H       | 26.347357000 | 21.084245000 | 24.167626000 | Zr               | 26.878209000 | 24.239690000 | 26.880717000 |
| H       | 26.900893000 | 16.153338000 | 19.263169000 | Zr               | 26.878209000 | 13.440633000 | 16.081660000 |
| Cu      | 26.721065000 | 22.204390000 | 18.390151000 | Zr               | 26.878142000 | 16.083467000 | 13.439738000 |
| Br      | 24.877874000 | 23.925724000 | 18.913072000 | O                | 24.934203000 | 26.880849000 | 23.334882000 |
| C       | 28.509106000 | 23.910365000 | 17.152362000 | O                | 25.848911000 | 25.848918000 | 25.848917000 |
| C       | 27.820945000 | 22.806098000 | 16.807437000 | O                | 25.849015000 | 27.912768000 | 25.849028000 |
| H       | 28.418854000 | 22.111607000 | 16.206880000 | O                | 27.912782000 | 25.849032000 | 25.849031000 |
| C       | 28.106287000 | 25.093939000 | 17.985627000 | O                | 27.912889000 | 27.912886000 | 25.848919000 |
| H       | 27.976758000 | 24.845689000 | 19.046071000 | O                | 26.880945000 | 28.827581000 | 23.334856000 |
| H       | 27.181939000 | 25.577521000 | 17.656630000 | O                | 28.827591000 | 26.880922000 | 23.334870000 |
| O       | 29.206795000 | 26.003968000 | 17.856454000 | O                | 24.934197000 | 23.334881000 | 26.880846000 |
| H       | 26.554263000 | 22.998774000 | 16.140957000 | O                | 25.849012000 | 25.849025000 | 27.912771000 |
| C       | 23.112630000 | 25.591233000 | 13.982295000 | O                | 27.912892000 | 25.848913000 | 27.912887000 |
| C       | 24.526352000 | 25.978637000 | 14.403303000 | O                | 26.880944000 | 23.334850000 | 28.827576000 |
| C       | 24.986691000 | 25.293099000 | 15.698375000 | O                | 28.827591000 | 23.334868000 | 26.880917000 |
| C       | 22.087353000 | 25.631724000 | 15.109241000 | O                | 25.849012000 | 12.408579000 | 14.472325000 |
| C       | 24.575364000 | 23.856668000 | 15.756206000 | O                | 25.848911000 | 14.472433000 | 14.472432000 |
| C       | 22.342129000 | 24.643364000 | 16.262660000 | O                | 24.934197000 | 13.440504000 | 16.986469000 |
| N       | 23.268836000 | 23.554378000 | 15.945615000 | O                | 26.880944000 | 11.493774000 | 16.986500000 |
| H       | 22.779987000 | 26.248260000 | 13.171960000 | O                | 27.912892000 | 12.408463000 | 14.472437000 |
| H       | 21.100492000 | 25.432519000 | 14.679594000 | O                | 27.912782000 | 14.472319000 | 14.472318000 |
| C       | 25.006187000 | 21.570233000 | 15.424662000 | O                | 28.827591000 | 13.440433000 | 16.986482000 |

| Journal Name | ARTICLE      |              |              |    |              |              |              |
|--------------|--------------|--------------|--------------|----|--------------|--------------|--------------|
| O            | 25.849015000 | 14.472322000 | 12.408582000 | C  | 23.753135000 | 30.008630000 | 27.063604000 |
| O            | 24.934203000 | 16.986468000 | 13.440501000 | C  | 26.696398000 | 30.008246000 | 30.008106000 |
| O            | 27.912889000 | 14.472431000 | 12.408464000 | C  | 30.007968000 | 30.008237000 | 26.695581000 |
| O            | 26.880945000 | 16.986494000 | 11.493769000 | C  | 30.008286000 | 26.697416000 | 30.008420000 |
| O            | 28.827591000 | 16.986480000 | 13.440428000 | C  | 23.753697000 | 10.313401000 | 13.255234000 |
| C            | 23.755332000 | 26.686089000 | 23.755213000 | C  | 23.753135000 | 13.257746000 | 10.312720000 |
| Zr           | 24.236612000 | 26.881475000 | 26.880552000 | C  | 26.696398000 | 10.313244000 | 10.313104000 |
| Zr           | 26.880671000 | 29.524609000 | 26.880680000 | C  | 30.008286000 | 10.312930000 | 13.623934000 |
| Zr           | 29.524440000 | 26.882357000 | 26.881381000 | C  | 30.007968000 | 13.625768000 | 10.313113000 |
| C            | 27.064326000 | 30.008530000 | 23.753165000 | H  | 27.351814000 | 30.759513000 | 23.002127000 |
| C            | 30.008123000 | 27.066993000 | 23.753823000 | H  | 30.758179000 | 27.358190000 | 23.003211000 |
| C            | 23.755714000 | 23.756676000 | 26.684338000 | H  | 23.008991000 | 23.009158000 | 26.377462000 |
| Zr           | 26.880615000 | 26.881402000 | 29.524137000 | H  | 27.355985000 | 23.003402000 | 30.758391000 |
| C            | 27.065914000 | 23.754135000 | 30.008060000 | H  | 30.757581000 | 23.004153000 | 27.359935000 |
| C            | 30.007964000 | 23.754748000 | 27.067567000 | H  | 23.008991000 | 13.943888000 | 17.312192000 |
| Zr           | 24.236612000 | 13.440798000 | 13.439875000 | H  | 27.355985000 | 9.562959000  | 17.317948000 |
| Zr           | 26.880615000 | 10.797213000 | 13.439948000 | H  | 30.757582000 | 12.961415000 | 17.317197000 |
| C            | 23.755714000 | 13.637012000 | 16.564674000 | H  | 27.351814000 | 17.319223000 | 9.561837000  |
| C            | 27.065914000 | 10.313290000 | 16.567215000 | H  | 30.758179000 | 17.318139000 | 12.963160000 |
| Zr           | 29.524440000 | 13.439969000 | 13.438993000 | H  | 23.003255000 | 27.356162000 | 30.758555000 |
| C            | 30.007964000 | 13.253783000 | 16.566602000 | H  | 23.001913000 | 30.759916000 | 27.349810000 |
| Zr           | 26.880671000 | 13.440670000 | 10.796741000 | H  | 26.407446000 | 30.758917000 | 30.758911000 |
| C            | 23.755332000 | 16.566137000 | 13.635261000 | H  | 30.758582000 | 30.758568000 | 26.405278000 |
| C            | 27.064326000 | 16.568185000 | 10.312820000 | H  | 30.759373000 | 26.409850000 | 30.759355000 |
| C            | 30.008123000 | 16.567527000 | 13.254357000 | H  | 23.003255000 | 9.562795000  | 12.965188000 |
| O            | 23.334855000 | 26.880866000 | 24.934215000 | H  | 23.001913000 | 12.971540000 | 9.561434000  |
| O            | 23.334856000 | 24.934212000 | 26.880862000 | H  | 26.407446000 | 9.562439000  | 9.562434000  |
| O            | 25.848909000 | 27.912895000 | 27.912897000 | H  | 30.759373000 | 9.561995000  | 13.911500000 |
| O            | 23.334862000 | 26.880939000 | 28.827594000 | H  | 30.758582000 | 13.916071000 | 9.562782000  |
| O            | 23.334864000 | 28.827596000 | 26.880937000 | H  | 25.215026000 | 11.776433000 | 15.102845000 |
| O            | 24.934210000 | 30.426941000 | 26.880925000 | H  | 28.544134000 | 11.776251000 | 11.775822000 |
| O            | 26.880889000 | 30.426939000 | 24.934203000 | H  | 28.555271000 | 15.099035000 | 15.098322000 |
| O            | 26.880879000 | 30.426942000 | 28.827590000 | H  | 25.215244000 | 15.103495000 | 11.776660000 |
| O            | 27.912786000 | 27.912776000 | 27.912777000 | H  | 25.215244000 | 28.544690000 | 25.217855000 |
| O            | 28.827596000 | 30.426944000 | 26.880863000 | H  | 28.555271000 | 25.223028000 | 25.222315000 |
| O            | 30.426933000 | 24.934198000 | 26.880924000 | H  | 28.544134000 | 28.545528000 | 28.545099000 |
| O            | 30.426936000 | 26.880929000 | 24.934199000 | H  | 25.215026000 | 25.218505000 | 28.544917000 |
| O            | 30.426944000 | 26.880866000 | 28.827595000 | O  | 14.472677000 | 25.848673000 | 12.472677000 |
| O            | 30.426946000 | 28.827594000 | 26.880867000 | O  | 12.408223000 | 25.848673000 | 12.408223000 |
| O            | 24.934211000 | 26.880924000 | 30.426942000 | O  | 14.472677000 | 25.848673000 | 12.408223000 |
| O            | 26.880889000 | 24.934201000 | 30.426937000 | O  | 12.408223000 | 25.848673000 | 14.472677000 |
| O            | 26.880878000 | 28.827589000 | 30.426943000 | Zr | 13.440450000 | 24.397374000 | 13.440450000 |
| O            | 28.827598000 | 26.880862000 | 30.426940000 | O  | 11.493735000 | 23.335040000 | 13.440450000 |
| O            | 25.848909000 | 12.408453000 | 12.408455000 | C  | 10.287052000 | 23.727502000 | 13.440450000 |
| O            | 23.334862000 | 11.493756000 | 13.440411000 | O  | 15.387165000 | 23.335040000 | 13.440450000 |
| O            | 23.334855000 | 15.387135000 | 13.440484000 | C  | 16.593848000 | 23.727502000 | 13.440450000 |
| O            | 23.334864000 | 13.440413000 | 11.493754000 | C  | 17.650268000 | 22.671082000 | 13.440450000 |
| O            | 23.334856000 | 13.440488000 | 15.387138000 | C  | 19.634347000 | 20.687003000 | 13.440450000 |
| O            | 24.934211000 | 9.894408000  | 13.440426000 | C  | 18.960712000 | 22.988008000 | 13.761408000 |
| O            | 26.880889000 | 9.894413000  | 15.387149000 | C  | 19.936757000 | 22.003898000 | 13.776461000 |
| O            | 27.912786000 | 12.408573000 | 12.408574000 | H  | 19.144577000 | 23.999268000 | 13.924306000 |
| O            | 26.880878000 | 9.894407000  | 11.493761000 | H  | 20.830009000 | 22.313835000 | 14.037206000 |
| O            | 28.827598000 | 9.894410000  | 13.440488000 | O  | 9.894590000  | 24.934185000 | 13.440450000 |
| O            | 30.426944000 | 11.493755000 | 13.440484000 | O  | 16.986310000 | 24.934185000 | 13.440450000 |
| O            | 30.426936000 | 15.387151000 | 13.440421000 | C  | 17.333342000 | 21.360638000 | 13.119492000 |
| O            | 30.426946000 | 13.440483000 | 11.493756000 | C  | 18.317452000 | 20.384593000 | 13.104439000 |
| O            | 30.426933000 | 13.440426000 | 15.387152000 | H  | 16.322082000 | 21.176773000 | 12.956594000 |
| O            | 24.934210000 | 13.440425000 | 9.894409000  | H  | 18.007515000 | 19.491341000 | 12.843694000 |
| O            | 26.880879000 | 11.493760000 | 9.894408000  | C  | 22.988008000 | 26.559942000 | 21.360638000 |
| O            | 26.880889000 | 15.387147000 | 9.894411000  | C  | 22.003898000 | 26.544889000 | 20.384593000 |
| O            | 28.827596000 | 13.440487000 | 9.894406000  | H  | 23.999268000 | 26.397044000 | 21.176773000 |
| C            | 23.753697000 | 27.066116000 | 30.007949000 | H  | 22.313835000 | 26.284144000 | 19.491341000 |

## ARTICLE

## Journal Name

|    |              |              |              |    |              |              |              |
|----|--------------|--------------|--------------|----|--------------|--------------|--------------|
| C  | 22.671082000 | 17.650268000 | 13.440450000 | C  | 18.317452000 | 27.216911000 | 19.936757000 |
| C  | 20.687003000 | 19.634347000 | 13.440450000 | H  | 16.322082000 | 27.364756000 | 19.144577000 |
| O  | 13.440450000 | 24.934185000 | 9.894590000  | H  | 18.007515000 | 27.477656000 | 20.830009000 |
| C  | 13.440450000 | 23.727502000 | 10.287052000 | H  | 13.440450000 | 30.790903000 | 9.530447000  |
| O  | 13.440450000 | 24.934185000 | 16.986310000 | H  | 17.350453000 | 26.880900000 | 9.530447000  |
| C  | 13.440450000 | 23.727502000 | 16.593848000 | H  | 17.350453000 | 30.790903000 | 13.440450000 |
| O  | 13.440450000 | 23.335040000 | 15.387165000 | H  | 13.440450000 | 30.790903000 | 17.350453000 |
| O  | 13.440450000 | 23.335040000 | 11.493735000 | H  | 9.530447000  | 30.790903000 | 13.440450000 |
| C  | 18.960712000 | 26.559942000 | 17.333342000 | H  | 9.530447000  | 26.880900000 | 17.350453000 |
| C  | 19.936757000 | 26.544889000 | 18.317452000 | H  | 13.440450000 | 22.970897000 | 9.530447000  |
| H  | 19.144577000 | 26.397044000 | 16.322082000 | H  | 9.530447000  | 22.970897000 | 13.440450000 |
| H  | 20.830009000 | 26.284144000 | 18.007515000 | H  | 13.440450000 | 22.970897000 | 17.350453000 |
| C  | 21.360638000 | 17.333342000 | 13.119492000 | H  | 15.026933000 | 25.294417000 | 11.853967000 |
| C  | 20.384593000 | 18.317452000 | 13.104439000 | H  | 11.853967000 | 28.467383000 | 11.853967000 |
| H  | 21.176773000 | 16.322082000 | 12.956594000 | H  | 9.530447000  | 26.880900000 | 9.530447000  |
| H  | 19.491341000 | 18.007515000 | 12.843694000 | H  | 15.026933000 | 28.467383000 | 15.026933000 |
| C  | 22.988008000 | 18.960712000 | 13.761408000 | H  | 11.853967000 | 25.294417000 | 15.026933000 |
| C  | 22.003898000 | 19.936757000 | 13.776461000 | H  | 26.685278000 | 23.859979000 | 20.930859000 |
| H  | 23.999268000 | 19.144577000 | 13.924306000 | H  | 26.400014000 | 19.386734000 | 16.471398000 |
| H  | 22.313835000 | 20.830009000 | 14.037206000 | H  | 26.571045000 | 19.236666000 | 22.500861000 |
| Zr | 10.956924000 | 26.880900000 | 13.440450000 | H  | 27.040058000 | 17.844924000 | 21.067587000 |
| O  | 9.894590000  | 26.880900000 | 11.493735000 | H  | 26.673220000 | 21.055918000 | 24.173301000 |
| O  | 12.408223000 | 27.913127000 | 14.472677000 | H  | 27.051961000 | 16.175706000 | 19.242402000 |
| C  | 10.287052000 | 26.880900000 | 10.287052000 | Cu | 26.852495000 | 22.244582000 | 18.359252000 |
| Zr | 15.923976000 | 26.880900000 | 13.440450000 | Br | 24.963116000 | 23.470025000 | 17.656786000 |
| O  | 16.986310000 | 26.880900000 | 11.493735000 | C  | 28.958922000 | 22.055933000 | 18.333120000 |
| C  | 16.593848000 | 26.880900000 | 10.287052000 | C  | 28.444246000 | 22.257480000 | 17.075722000 |
| O  | 16.986310000 | 26.880900000 | 15.387165000 | H  | 28.324832000 | 21.419901000 | 16.395906000 |
| O  | 14.472677000 | 27.913127000 | 12.408223000 | C  | 29.579242000 | 23.024441000 | 19.294523000 |
| C  | 16.593848000 | 26.880900000 | 16.593848000 | H  | 28.927760000 | 23.851496000 | 19.582832000 |
| C  | 17.650268000 | 26.880900000 | 17.650268000 | H  | 30.516708000 | 23.453031000 | 18.918417000 |
| C  | 19.634347000 | 26.880900000 | 19.634347000 | O  | 29.871650000 | 22.195314000 | 20.434255000 |
| O  | 9.894590000  | 26.880900000 | 15.387165000 | H  | 28.460313000 | 23.260975000 | 16.667715000 |
| C  | 10.287052000 | 26.880900000 | 16.593848000 | C  | 26.558126000 | 28.586242000 | 19.560530000 |
| Zr | 13.440450000 | 26.880900000 | 15.923976000 | C  | 26.955214000 | 27.393774000 | 20.421611000 |
| O  | 11.493735000 | 26.880900000 | 16.986310000 | C  | 27.021428000 | 26.044693000 | 19.682496000 |
| O  | 14.472677000 | 27.913127000 | 14.472677000 | C  | 25.229241000 | 28.446887000 | 18.827922000 |
| Zr | 13.440450000 | 26.880900000 | 10.956924000 | C  | 27.326310000 | 26.115635000 | 18.211011000 |
| O  | 11.493735000 | 26.880900000 | 9.894590000  | C  | 25.104106000 | 27.143721000 | 18.031398000 |
| O  | 15.387165000 | 26.880900000 | 9.894590000  | N  | 26.360401000 | 26.707029000 | 17.430566000 |
| O  | 12.408223000 | 27.913127000 | 12.408223000 | H  | 26.535018000 | 29.485476000 | 20.188028000 |
| O  | 15.387165000 | 26.880900000 | 16.986310000 | H  | 25.111383000 | 29.305003000 | 18.154570000 |
| Zr | 13.440450000 | 29.364426000 | 13.440450000 | C  | 28.702815000 | 25.788128000 | 16.369225000 |
| O  | 11.493735000 | 30.426760000 | 13.440450000 | N  | 28.465792000 | 25.650498000 | 17.796467000 |
| C  | 10.287052000 | 30.034298000 | 13.440450000 | C  | 27.439267000 | 25.551950000 | 15.555848000 |
| O  | 15.387165000 | 30.426760000 | 13.440450000 | C  | 26.376489000 | 26.542979000 | 15.979092000 |
| C  | 16.593848000 | 30.034298000 | 13.440450000 | H  | 25.388212000 | 26.179647000 | 15.668927000 |
| O  | 16.986310000 | 28.827615000 | 13.440450000 | H  | 29.496503000 | 25.087290000 | 16.074188000 |
| O  | 9.894590000  | 28.827615000 | 13.440450000 | H  | 27.346818000 | 28.757105000 | 18.816237000 |
| C  | 22.671082000 | 26.880900000 | 22.671082000 | H  | 24.394506000 | 28.500150000 | 19.538543000 |
| C  | 20.687003000 | 26.880900000 | 20.687003000 | H  | 26.532502000 | 27.522268000 | 15.499457000 |
| C  | 21.360638000 | 27.201858000 | 22.988008000 | H  | 29.100338000 | 26.793929000 | 16.151365000 |
| C  | 20.384593000 | 27.216911000 | 22.003898000 | H  | 26.261384000 | 27.301638000 | 21.264044000 |
| H  | 21.176773000 | 27.364756000 | 23.999268000 | H  | 27.934398000 | 27.604520000 | 20.862173000 |
| H  | 19.491341000 | 27.477656000 | 22.313835000 | H  | 27.620521000 | 25.633671000 | 14.479267000 |
| O  | 13.440450000 | 28.827615000 | 16.986310000 | H  | 27.061469000 | 24.541745000 | 15.758357000 |
| C  | 13.440450000 | 30.034298000 | 16.593848000 | H  | 27.810775000 | 25.437786000 | 20.134606000 |
| O  | 13.440450000 | 28.827615000 | 9.894590000  | H  | 26.080799000 | 25.491127000 | 19.802937000 |
| C  | 13.440450000 | 30.034298000 | 10.287052000 | H  | 24.699065000 | 26.332526000 | 18.648888000 |
| O  | 13.440450000 | 30.426760000 | 15.387165000 | H  | 24.383991000 | 27.270176000 | 17.217969000 |
| O  | 13.440450000 | 30.426760000 | 11.493735000 | C  | 29.743149000 | 20.898853000 | 20.097159000 |
| C  | 17.333342000 | 27.201858000 | 18.960712000 | O  | 29.308131000 | 20.787410000 | 18.799835000 |

|              |              |              |              |    |              |              |              |
|--------------|--------------|--------------|--------------|----|--------------|--------------|--------------|
| O            | 29.957651000 | 19.962642000 | 20.810946000 | Zr | 29.524440000 | 13.439969000 | 13.438993000 |
| <b>k. PC</b> |              |              |              | C  | 30.007964000 | 13.253783000 | 16.566602000 |
| N            | 26.639011000 | 21.856523000 | 20.404758000 | Zr | 26.880671000 | 13.440670000 | 10.796741000 |
| N            | 26.484100000 | 19.910263000 | 18.471583000 | C  | 23.755332000 | 16.566137000 | 13.635261000 |
| C            | 26.639224000 | 20.562396000 | 20.809239000 | C  | 27.064326000 | 16.568185000 | 10.312820000 |
| C            | 26.643437000 | 22.846784000 | 21.315969000 | C  | 30.008123000 | 16.567527000 | 13.254357000 |
| C            | 26.526765000 | 18.999285000 | 17.487021000 | O  | 23.334855000 | 26.880866000 | 24.934215000 |
| C            | 26.657638000 | 19.510218000 | 19.752648000 | O  | 23.334856000 | 24.934212000 | 26.880862000 |
| C            | 26.645608000 | 20.264619000 | 22.178195000 | O  | 25.848909000 | 27.912895000 | 27.912897000 |
| C            | 26.697275000 | 22.628034000 | 22.698855000 | O  | 23.334862000 | 26.880939000 | 28.827594000 |
| C            | 26.720686000 | 17.624074000 | 17.695101000 | O  | 23.334864000 | 28.827596000 | 26.880937000 |
| C            | 26.871591000 | 18.158032000 | 20.049595000 | O  | 24.934210000 | 30.426941000 | 26.880925000 |
| C            | 26.691868000 | 21.288573000 | 23.112906000 | O  | 26.880889000 | 30.426939000 | 24.934203000 |
| C            | 26.892295000 | 17.221287000 | 19.026533000 | O  | 26.880879000 | 30.426942000 | 28.827590000 |
| C            | 26.809925000 | 23.730886000 | 23.728973000 | O  | 27.912786000 | 27.912776000 | 27.912777000 |
| C            | 26.809925000 | 16.592377000 | 16.590464000 | O  | 28.827596000 | 30.426944000 | 26.880863000 |
| O            | 26.880885000 | 24.934153000 | 23.334955000 | O  | 30.426933000 | 24.934198000 | 26.880924000 |
| O            | 26.880903000 | 23.334945000 | 24.934136000 | O  | 30.426936000 | 26.880929000 | 24.934199000 |
| O            | 26.880903000 | 15.387214000 | 16.986405000 | O  | 30.426944000 | 26.880866000 | 28.827595000 |
| O            | 26.880885000 | 16.986395000 | 15.387197000 | O  | 30.426946000 | 28.827594000 | 26.880867000 |
| Zr           | 26.878142000 | 26.881612000 | 24.237883000 | O  | 24.934211000 | 26.880924000 | 30.426942000 |
| Zr           | 26.878209000 | 24.239690000 | 26.880717000 | O  | 26.880889000 | 24.934201000 | 30.426937000 |
| Zr           | 26.878209000 | 13.440633000 | 16.081660000 | O  | 26.880878000 | 28.827589000 | 30.426943000 |
| Zr           | 26.878142000 | 16.083467000 | 13.439738000 | O  | 28.827598000 | 26.880862000 | 30.426940000 |
| O            | 24.934203000 | 26.880849000 | 23.334882000 | O  | 25.848909000 | 12.408453000 | 12.408455000 |
| O            | 25.848911000 | 25.848918000 | 25.848917000 | O  | 23.334862000 | 11.493756000 | 13.440411000 |
| O            | 25.849015000 | 27.912768000 | 25.849028000 | O  | 23.334855000 | 15.387135000 | 13.440484000 |
| O            | 27.912782000 | 25.849032000 | 25.849031000 | O  | 23.334864000 | 13.440413000 | 11.493754000 |
| O            | 27.912889000 | 27.912886000 | 25.848919000 | O  | 23.334856000 | 13.440488000 | 15.387138000 |
| O            | 26.880945000 | 28.827581000 | 23.334856000 | O  | 24.934211000 | 9.894408000  | 13.440426000 |
| O            | 28.827591000 | 26.880922000 | 23.334870000 | O  | 26.880889000 | 9.894413000  | 15.387149000 |
| O            | 24.934197000 | 23.334881000 | 26.880846000 | O  | 27.912786000 | 12.408573000 | 12.408574000 |
| O            | 25.849012000 | 25.849025000 | 27.912771000 | O  | 26.880878000 | 9.894407000  | 11.493761000 |
| O            | 27.912892000 | 25.848913000 | 27.912887000 | O  | 28.827598000 | 9.894410000  | 13.440488000 |
| O            | 26.880944000 | 23.334850000 | 28.827576000 | O  | 30.426944000 | 11.493755000 | 13.440484000 |
| O            | 28.827591000 | 23.334868000 | 26.880917000 | O  | 30.426936000 | 15.387151000 | 13.440421000 |
| O            | 25.849012000 | 12.408579000 | 14.472325000 | O  | 30.426946000 | 13.440483000 | 11.493756000 |
| O            | 25.848911000 | 14.472433000 | 14.472432000 | O  | 30.426933000 | 13.440426000 | 15.387152000 |
| O            | 24.934197000 | 13.440504000 | 16.986469000 | O  | 24.934210000 | 13.440425000 | 9.894409000  |
| O            | 26.880944000 | 11.493774000 | 16.986500000 | O  | 26.880879000 | 11.493760000 | 9.894408000  |
| O            | 27.912892000 | 12.408463000 | 14.472437000 | O  | 26.880889000 | 15.387147000 | 9.894411000  |
| O            | 27.912782000 | 14.472319000 | 14.472318000 | O  | 28.827596000 | 13.440487000 | 9.894406000  |
| O            | 28.827591000 | 13.440433000 | 16.986482000 | C  | 23.753697000 | 27.066116000 | 30.007949000 |
| O            | 25.849015000 | 14.472322000 | 12.408582000 | C  | 23.753135000 | 30.008630000 | 27.063604000 |
| O            | 24.934203000 | 16.986468000 | 13.440501000 | C  | 26.696398000 | 30.008246000 | 30.008106000 |
| O            | 27.912889000 | 14.472431000 | 12.408464000 | C  | 30.007968000 | 30.008237000 | 26.695581000 |
| O            | 26.880945000 | 16.986494000 | 11.493769000 | C  | 30.008286000 | 26.697416000 | 30.008420000 |
| O            | 28.827591000 | 16.986480000 | 13.440428000 | C  | 23.753697000 | 10.313401000 | 13.255234000 |
| C            | 23.755332000 | 26.686089000 | 23.755213000 | C  | 23.753135000 | 13.257746000 | 10.312720000 |
| Zr           | 24.236612000 | 26.881475000 | 26.880552000 | C  | 26.696398000 | 10.313244000 | 10.313104000 |
| Zr           | 26.880671000 | 29.524609000 | 26.880680000 | C  | 30.008286000 | 10.312930000 | 13.623934000 |
| Zr           | 29.524440000 | 26.882357000 | 26.881381000 | C  | 30.007968000 | 13.625768000 | 10.313113000 |
| C            | 27.064326000 | 30.008530000 | 23.753165000 | H  | 27.351814000 | 30.759513000 | 23.002127000 |
| C            | 30.008123000 | 27.066993000 | 23.753823000 | H  | 30.758179000 | 27.358190000 | 23.003211000 |
| C            | 23.755714000 | 23.756676000 | 26.684338000 | H  | 23.008991000 | 23.009158000 | 26.377462000 |
| Zr           | 26.880615000 | 26.881402000 | 29.524137000 | H  | 27.355985000 | 23.003402000 | 30.758391000 |
| C            | 27.065914000 | 23.754135000 | 30.008060000 | H  | 30.757581000 | 23.004153000 | 27.359935000 |
| C            | 30.007964000 | 23.754748000 | 27.067567000 | H  | 23.008991000 | 13.943888000 | 17.312192000 |
| Zr           | 24.236612000 | 13.440798000 | 13.439875000 | H  | 27.355985000 | 9.562959000  | 17.317948000 |
| Zr           | 26.880615000 | 10.797213000 | 13.439948000 | H  | 30.757582000 | 12.961415000 | 17.317197000 |
| C            | 23.755714000 | 13.637012000 | 16.564674000 | H  | 27.351814000 | 17.319223000 | 9.561837000  |
| C            | 27.065914000 | 10.313290000 | 16.567215000 | H  | 30.758179000 | 17.318139000 | 12.963160000 |

## ARTICLE

## Journal Name

|    |              |              |              |    |              |              |              |
|----|--------------|--------------|--------------|----|--------------|--------------|--------------|
| H  | 23.003255000 | 27.356162000 | 30.758555000 | H  | 22.313835000 | 20.830009000 | 14.037206000 |
| H  | 23.001913000 | 30.759916000 | 27.349810000 | Zr | 10.956924000 | 26.880900000 | 13.440450000 |
| H  | 26.407446000 | 30.758917000 | 30.758911000 | O  | 9.894590000  | 26.880900000 | 11.493735000 |
| H  | 30.758582000 | 30.758568000 | 26.405278000 | O  | 12.408223000 | 27.913127000 | 14.472677000 |
| H  | 30.759373000 | 26.409850000 | 30.759355000 | C  | 10.287052000 | 26.880900000 | 10.287052000 |
| H  | 23.003255000 | 9.562795000  | 12.965188000 | Zr | 15.923976000 | 26.880900000 | 13.440450000 |
| H  | 23.001913000 | 12.971540000 | 9.561434000  | O  | 16.986310000 | 26.880900000 | 11.493735000 |
| H  | 26.407446000 | 9.562439000  | 9.562434000  | C  | 16.593848000 | 26.880900000 | 10.287052000 |
| H  | 30.759373000 | 9.561995000  | 13.911500000 | O  | 16.986310000 | 26.880900000 | 15.387165000 |
| H  | 30.758582000 | 13.916071000 | 9.562782000  | O  | 14.472677000 | 27.913127000 | 12.408223000 |
| H  | 25.215026000 | 11.776433000 | 15.102845000 | C  | 16.593848000 | 26.880900000 | 16.593848000 |
| H  | 28.544134000 | 11.776251000 | 11.775822000 | C  | 17.650268000 | 26.880900000 | 17.650268000 |
| H  | 28.555271000 | 15.099035000 | 15.098322000 | C  | 19.634347000 | 26.880900000 | 19.634347000 |
| H  | 25.215244000 | 15.103495000 | 11.776660000 | O  | 9.894590000  | 26.880900000 | 15.387165000 |
| H  | 25.215244000 | 28.544690000 | 25.217855000 | C  | 10.287052000 | 26.880900000 | 16.593848000 |
| H  | 28.555271000 | 25.223028000 | 25.222315000 | Zr | 13.440450000 | 26.880900000 | 15.923976000 |
| H  | 28.544134000 | 28.545528000 | 28.545099000 | O  | 11.493735000 | 26.880900000 | 16.986310000 |
| H  | 25.215026000 | 25.218505000 | 28.544917000 | O  | 14.472677000 | 27.913127000 | 14.472677000 |
| O  | 14.472677000 | 25.848673000 | 14.472677000 | Zr | 13.440450000 | 26.880900000 | 10.956924000 |
| O  | 12.408223000 | 25.848673000 | 12.408223000 | O  | 11.493735000 | 26.880900000 | 9.894590000  |
| O  | 14.472677000 | 25.848673000 | 12.408223000 | O  | 15.387165000 | 26.880900000 | 9.894590000  |
| O  | 12.408223000 | 25.848673000 | 14.472677000 | O  | 12.408223000 | 27.913127000 | 12.408223000 |
| Zr | 13.440450000 | 24.397374000 | 13.440450000 | O  | 15.387165000 | 26.880900000 | 16.986310000 |
| O  | 11.493735000 | 23.335040000 | 13.440450000 | Zr | 13.440450000 | 29.364426000 | 13.440450000 |
| C  | 10.287052000 | 23.727502000 | 13.440450000 | O  | 11.493735000 | 30.426760000 | 13.440450000 |
| O  | 15.387165000 | 23.335040000 | 13.440450000 | C  | 10.287052000 | 30.034298000 | 13.440450000 |
| C  | 16.593848000 | 23.727502000 | 13.440450000 | O  | 15.387165000 | 30.426760000 | 13.440450000 |
| C  | 17.650268000 | 22.671082000 | 13.440450000 | C  | 16.593848000 | 30.034298000 | 13.440450000 |
| C  | 19.634347000 | 20.687003000 | 13.440450000 | O  | 16.986310000 | 28.827615000 | 13.440450000 |
| C  | 18.960712000 | 22.988008000 | 13.761408000 | O  | 9.894590000  | 28.827615000 | 13.440450000 |
| C  | 19.936757000 | 22.003898000 | 13.776461000 | C  | 22.671082000 | 26.880900000 | 22.671082000 |
| H  | 19.144577000 | 23.999268000 | 13.924306000 | C  | 20.687003000 | 26.880900000 | 20.687003000 |
| H  | 20.830009000 | 22.313835000 | 14.037206000 | C  | 21.360638000 | 27.201858000 | 22.988008000 |
| O  | 9.894590000  | 24.934185000 | 13.440450000 | C  | 20.384593000 | 27.216911000 | 22.003898000 |
| O  | 16.986310000 | 24.934185000 | 13.440450000 | H  | 21.176773000 | 27.364756000 | 23.999268000 |
| C  | 17.333342000 | 21.360638000 | 13.119492000 | H  | 19.491341000 | 27.477656000 | 22.313835000 |
| C  | 18.317452000 | 20.384593000 | 13.104439000 | O  | 13.440450000 | 28.827615000 | 16.986310000 |
| H  | 16.322082000 | 21.176773000 | 12.956594000 | C  | 13.440450000 | 30.034298000 | 16.593848000 |
| H  | 18.007515000 | 19.491341000 | 12.843694000 | O  | 13.440450000 | 28.827615000 | 9.894590000  |
| C  | 22.988008000 | 26.559942000 | 21.360638000 | C  | 13.440450000 | 30.034298000 | 10.287052000 |
| C  | 22.003898000 | 26.544889000 | 20.384593000 | O  | 13.440450000 | 30.426760000 | 15.387165000 |
| H  | 23.999268000 | 26.397044000 | 21.176773000 | O  | 13.440450000 | 30.426760000 | 11.493735000 |
| H  | 22.313835000 | 26.284144000 | 19.491341000 | C  | 17.333342000 | 27.201858000 | 18.960712000 |
| C  | 22.671082000 | 17.650268000 | 13.440450000 | C  | 18.317452000 | 27.216911000 | 19.936757000 |
| C  | 20.687003000 | 19.634347000 | 13.440450000 | H  | 16.322082000 | 27.364756000 | 19.144577000 |
| O  | 13.440450000 | 24.934185000 | 9.894590000  | H  | 18.007515000 | 27.477656000 | 20.830009000 |
| C  | 13.440450000 | 23.727502000 | 10.287052000 | H  | 13.440450000 | 30.790903000 | 9.530447000  |
| O  | 13.440450000 | 24.934185000 | 16.986310000 | H  | 17.350453000 | 26.880900000 | 9.530447000  |
| C  | 13.440450000 | 23.727502000 | 16.593848000 | H  | 17.350453000 | 30.790903000 | 13.440450000 |
| O  | 13.440450000 | 23.335040000 | 15.387165000 | H  | 13.440450000 | 30.790903000 | 17.350453000 |
| O  | 13.440450000 | 23.335040000 | 11.493735000 | H  | 9.530447000  | 30.790903000 | 13.440450000 |
| C  | 18.960712000 | 26.559942000 | 17.333342000 | H  | 9.530447000  | 26.880900000 | 17.350453000 |
| C  | 19.936757000 | 26.544889000 | 18.317452000 | H  | 13.440450000 | 22.970897000 | 9.530447000  |
| H  | 19.144577000 | 26.397044000 | 16.322082000 | H  | 9.530447000  | 22.970897000 | 13.440450000 |
| H  | 20.830009000 | 26.284144000 | 18.007515000 | H  | 13.440450000 | 22.970897000 | 17.350453000 |
| C  | 21.360638000 | 17.333342000 | 13.119492000 | H  | 15.026933000 | 25.294417000 | 11.853967000 |
| C  | 20.384593000 | 18.317452000 | 13.104439000 | H  | 11.853967000 | 28.467383000 | 11.853967000 |
| H  | 21.176773000 | 16.322082000 | 12.956594000 | H  | 9.530447000  | 26.880900000 | 9.530447000  |
| H  | 19.491341000 | 18.007515000 | 12.843694000 | H  | 15.026933000 | 28.467383000 | 15.026933000 |
| C  | 22.988008000 | 18.960712000 | 13.761408000 | H  | 11.853967000 | 25.294417000 | 15.026933000 |
| C  | 22.003898000 | 19.936757000 | 13.776461000 | H  | 26.606085000 | 23.857706000 | 20.913070000 |
| H  | 23.999268000 | 19.144577000 | 13.924306000 | H  | 26.390881000 | 19.385127000 | 16.477931000 |

|                                  |              |              |              |    |              |              |              |
|----------------------------------|--------------|--------------|--------------|----|--------------|--------------|--------------|
| H                                | 26.62510000  | 19.234783000 | 22.517383000 | O  | 27.912889000 | 14.472431000 | 12.408464000 |
| H                                | 27.052215000 | 17.836369000 | 21.069655000 | O  | 26.880945000 | 16.986494000 | 11.493769000 |
| H                                | 26.726690000 | 21.067916000 | 24.174703000 | O  | 28.827591000 | 16.986480000 | 11.440428000 |
| H                                | 27.062474000 | 16.171175000 | 19.240211000 | C  | 23.755332000 | 26.686089000 | 23.755213000 |
| Cu                               | 26.774522000 | 22.158613000 | 18.338062000 | Zr | 24.236612000 | 26.881475000 | 26.880552000 |
| Br                               | 25.067740000 | 23.608416000 | 17.672151000 | Zr | 26.880671000 | 29.524609000 | 26.880680000 |
| C                                | 28.894967000 | 22.075747000 | 18.310770000 | Zr | 29.524440000 | 26.882357000 | 26.881381000 |
| C                                | 28.375610000 | 22.271652000 | 17.055320000 | C  | 27.064326000 | 30.008530000 | 23.753165000 |
| H                                | 28.307698000 | 21.440409000 | 16.361156000 | C  | 30.008123000 | 27.066993000 | 23.753823000 |
| C                                | 29.440616000 | 23.060755000 | 19.302590000 | C  | 23.755714000 | 23.756676000 | 26.684338000 |
| H                                | 28.723791000 | 23.826530000 | 19.613337000 | Zr | 26.880615000 | 26.881402000 | 29.524137000 |
| H                                | 30.357978000 | 23.553573000 | 18.953900000 | C  | 27.065914000 | 23.754135000 | 30.008060000 |
| O                                | 29.767637000 | 22.235372000 | 20.428066000 | C  | 30.007964000 | 23.754748000 | 27.067567000 |
| H                                | 28.311795000 | 23.275256000 | 16.650539000 | Zr | 24.236612000 | 13.440798000 | 13.439875000 |
| C                                | 29.725012000 | 20.935187000 | 20.063732000 | Zr | 26.880615000 | 10.797213000 | 13.439948000 |
| O                                | 29.318996000 | 20.823650000 | 18.759150000 | C  | 23.755714000 | 13.637012000 | 16.564674000 |
| O                                | 29.989565000 | 20.006050000 | 20.767408000 | C  | 27.065914000 | 10.313290000 | 16.567215000 |
| <b>4. CuI-UiO-67(bpy) system</b> |              |              |              | Zr | 29.524440000 | 13.439969000 | 13.438993000 |
| <b>a. Isolated</b>               |              |              |              | C  | 30.007964000 | 13.253783000 | 16.566602000 |
| N                                | 26.673404000 | 21.843107000 | 20.407035000 | Zr | 26.880671000 | 13.440670000 | 10.796741000 |
| N                                | 26.548494000 | 19.917228000 | 18.473356000 | C  | 23.755332000 | 16.566137000 | 13.635261000 |
| C                                | 26.634605000 | 20.556559000 | 20.824339000 | C  | 27.064326000 | 16.568185000 | 10.312820000 |
| C                                | 26.690278000 | 22.837395000 | 21.309520000 | C  | 30.008123000 | 16.567527000 | 13.254357000 |
| C                                | 26.593839000 | 19.001415000 | 17.481257000 | O  | 23.334855000 | 26.880866000 | 24.934215000 |
| C                                | 26.652823000 | 19.506913000 | 19.768327000 | O  | 23.334856000 | 24.934212000 | 26.880862000 |
| C                                | 26.585990000 | 20.260904000 | 22.193424000 | O  | 25.848909000 | 27.912895000 | 27.912897000 |
| C                                | 26.694847000 | 22.627307000 | 22.698587000 | O  | 23.334862000 | 26.880939000 | 28.827594000 |
| C                                | 26.715414000 | 17.622345000 | 17.697145000 | O  | 23.334864000 | 28.827596000 | 26.880937000 |
| C                                | 26.777350000 | 18.143350000 | 20.058111000 | O  | 24.934210000 | 30.426941000 | 26.880925000 |
| C                                | 26.627510000 | 21.291889000 | 23.122047000 | O  | 26.880889000 | 30.426939000 | 24.934203000 |
| C                                | 26.798116000 | 17.207120000 | 19.034409000 | O  | 26.880879000 | 30.426942000 | 28.827590000 |
| C                                | 26.809925000 | 23.730886000 | 23.728973000 | O  | 27.912786000 | 27.912776000 | 27.912777000 |
| C                                | 26.809925000 | 16.592377000 | 16.590464000 | O  | 28.827596000 | 30.426944000 | 26.880863000 |
| O                                | 26.880885000 | 24.934153000 | 23.334955000 | O  | 30.426933000 | 24.934198000 | 26.880924000 |
| O                                | 26.880903000 | 23.334945000 | 24.934136000 | O  | 30.426936000 | 26.880929000 | 24.934199000 |
| O                                | 26.880903000 | 15.387214000 | 16.986405000 | O  | 30.426944000 | 26.880866000 | 28.827595000 |
| O                                | 26.880885000 | 16.986395000 | 15.387197000 | O  | 30.426946000 | 28.827594000 | 26.880867000 |
| Zr                               | 26.878142000 | 26.881612000 | 24.237883000 | O  | 24.934211000 | 26.880924000 | 30.426942000 |
| Zr                               | 26.878209000 | 24.239690000 | 26.880717000 | O  | 26.880889000 | 24.934201000 | 30.426937000 |
| Zr                               | 26.878209000 | 13.440633000 | 16.081660000 | O  | 26.880878000 | 28.827589000 | 30.426943000 |
| Zr                               | 26.878142000 | 16.083467000 | 13.439738000 | O  | 28.827598000 | 26.880862000 | 30.426940000 |
| O                                | 24.934203000 | 26.880849000 | 23.334882000 | O  | 25.848909000 | 12.408453000 | 12.408455000 |
| O                                | 25.848911000 | 25.848918000 | 25.848917000 | O  | 23.334862000 | 11.493756000 | 13.440411000 |
| O                                | 25.849015000 | 27.912768000 | 25.849028000 | O  | 23.334855000 | 15.387135000 | 13.440484000 |
| O                                | 27.912782000 | 25.849032000 | 25.849031000 | O  | 23.334864000 | 13.440413000 | 11.493754000 |
| O                                | 27.912889000 | 27.912886000 | 25.848919000 | O  | 23.334856000 | 13.440488000 | 15.387138000 |
| O                                | 26.880945000 | 28.827581000 | 23.334856000 | O  | 24.934211000 | 9.894408000  | 13.440426000 |
| O                                | 28.827591000 | 26.880922000 | 23.334870000 | O  | 26.880889000 | 9.894413000  | 15.387149000 |
| O                                | 24.934197000 | 23.334881000 | 26.880846000 | O  | 27.912786000 | 12.408573000 | 12.408574000 |
| O                                | 25.849012000 | 25.849025000 | 27.912771000 | O  | 26.880878000 | 9.894407000  | 11.493761000 |
| O                                | 27.912892000 | 25.848913000 | 27.912887000 | O  | 28.827598000 | 9.894410000  | 13.440488000 |
| O                                | 26.880944000 | 23.334850000 | 28.827576000 | O  | 30.426944000 | 11.493755000 | 13.440484000 |
| O                                | 28.827591000 | 23.334868000 | 26.880917000 | O  | 30.426936000 | 15.387151000 | 13.440421000 |
| O                                | 25.849012000 | 12.408579000 | 14.472325000 | O  | 30.426946000 | 13.440483000 | 11.493756000 |
| O                                | 25.848911000 | 14.472433000 | 14.472432000 | O  | 30.426933000 | 13.440426000 | 15.387152000 |
| O                                | 24.934197000 | 13.440504000 | 16.986469000 | O  | 24.934210000 | 13.440425000 | 9.894409000  |
| O                                | 26.880944000 | 11.493774000 | 16.986500000 | O  | 26.880879000 | 11.493760000 | 9.894408000  |
| O                                | 27.912892000 | 12.408463000 | 14.472437000 | O  | 26.880889000 | 15.387147000 | 9.894411000  |
| O                                | 27.912782000 | 14.472319000 | 14.472318000 | O  | 28.827596000 | 13.440487000 | 9.894406000  |
| O                                | 28.827591000 | 13.440433000 | 16.986482000 | C  | 23.753697000 | 27.066116000 | 30.007949000 |
| O                                | 25.849015000 | 14.472322000 | 12.408582000 | C  | 23.753135000 | 30.008630000 | 27.063604000 |
| O                                | 24.934203000 | 16.986468000 | 13.440501000 | C  | 26.696398000 | 30.008246000 | 30.008106000 |

## ARTICLE

## Journal Name

|    |              |              |              |    |              |              |              |
|----|--------------|--------------|--------------|----|--------------|--------------|--------------|
| C  | 30.007968000 | 30.008237000 | 26.695581000 | O  | 13.440450000 | 24.934185000 | 9.894590000  |
| C  | 30.008286000 | 26.697416000 | 30.008420000 | C  | 13.440450000 | 23.727502000 | 10.287052000 |
| C  | 23.753697000 | 10.313401000 | 13.255234000 | O  | 13.440450000 | 24.934185000 | 16.986310000 |
| C  | 23.753135000 | 13.257746000 | 10.312720000 | C  | 13.440450000 | 23.727502000 | 16.593848000 |
| C  | 26.696398000 | 10.313244000 | 10.313104000 | O  | 13.440450000 | 23.335040000 | 15.387165000 |
| C  | 30.008286000 | 10.312930000 | 13.623934000 | O  | 13.440450000 | 23.335040000 | 11.493735000 |
| C  | 30.007968000 | 13.625768000 | 10.313113000 | C  | 18.960712000 | 26.559942000 | 17.333342000 |
| H  | 27.351814000 | 30.759513000 | 23.002127000 | C  | 19.936757000 | 26.544889000 | 18.317452000 |
| H  | 30.758179000 | 27.358190000 | 23.003211000 | H  | 19.144577000 | 26.397044000 | 16.322082000 |
| H  | 23.008991000 | 23.009158000 | 26.377462000 | H  | 20.830009000 | 26.284144000 | 18.007515000 |
| H  | 27.355985000 | 23.003402000 | 30.758391000 | C  | 21.360638000 | 17.333342000 | 13.119492000 |
| H  | 30.757581000 | 23.004153000 | 27.359935000 | C  | 20.384593000 | 18.317452000 | 13.104439000 |
| H  | 23.008991000 | 13.943888000 | 17.312192000 | H  | 21.176773000 | 16.322082000 | 12.956594000 |
| H  | 27.355985000 | 9.562959000  | 17.317948000 | H  | 19.491341000 | 18.007515000 | 12.843694000 |
| H  | 30.757582000 | 12.961415000 | 17.317197000 | C  | 22.988008000 | 18.960712000 | 13.761408000 |
| H  | 27.351814000 | 17.319223000 | 9.561837000  | C  | 22.003898000 | 19.936757000 | 13.776461000 |
| H  | 30.758179000 | 17.318139000 | 12.963160000 | H  | 23.999268000 | 19.144577000 | 13.924306000 |
| H  | 23.003255000 | 27.356162000 | 30.758555000 | H  | 22.313835000 | 20.830009000 | 14.037206000 |
| H  | 23.001913000 | 30.759916000 | 27.349810000 | Zr | 10.956924000 | 26.880900000 | 13.440450000 |
| H  | 26.407446000 | 30.758917000 | 30.758911000 | O  | 9.894590000  | 26.880900000 | 11.493735000 |
| H  | 30.758582000 | 30.758568000 | 26.405278000 | O  | 12.408223000 | 27.913127000 | 14.472677000 |
| H  | 30.759373000 | 26.409850000 | 30.759355000 | C  | 10.287052000 | 26.880900000 | 10.287052000 |
| H  | 23.003255000 | 9.562795000  | 12.965188000 | Zr | 15.923976000 | 26.880900000 | 13.440450000 |
| H  | 23.001913000 | 12.971540000 | 9.561434000  | O  | 16.986310000 | 26.880900000 | 11.493735000 |
| H  | 26.407446000 | 9.562439000  | 9.562434000  | C  | 16.593848000 | 26.880900000 | 10.287052000 |
| H  | 30.759373000 | 9.561995000  | 13.911500000 | O  | 16.986310000 | 26.880900000 | 15.387165000 |
| H  | 30.758582000 | 13.916071000 | 9.562782000  | O  | 14.472677000 | 27.913127000 | 12.408223000 |
| H  | 25.215026000 | 11.776433000 | 15.102845000 | C  | 16.593848000 | 26.880900000 | 16.593848000 |
| H  | 28.544134000 | 11.776251000 | 11.775822000 | C  | 17.650268000 | 26.880900000 | 17.650268000 |
| H  | 28.555271000 | 15.099035000 | 15.098322000 | C  | 19.634347000 | 26.880900000 | 19.634347000 |
| H  | 25.215244000 | 15.103495000 | 11.776660000 | O  | 9.894590000  | 26.880900000 | 15.387165000 |
| H  | 25.215244000 | 28.544690000 | 25.217855000 | C  | 10.287052000 | 26.880900000 | 16.593848000 |
| H  | 28.555271000 | 25.223028000 | 25.222315000 | Zr | 13.440450000 | 26.880900000 | 15.923976000 |
| H  | 28.544134000 | 28.545528000 | 28.545099000 | O  | 11.493735000 | 26.880900000 | 16.986310000 |
| H  | 25.215026000 | 25.218505000 | 28.544917000 | O  | 14.472677000 | 27.913127000 | 14.472677000 |
| O  | 14.472677000 | 25.848673000 | 14.472677000 | Zr | 13.440450000 | 26.880900000 | 10.956924000 |
| O  | 12.408223000 | 25.848673000 | 12.408223000 | O  | 11.493735000 | 26.880900000 | 9.894590000  |
| O  | 14.472677000 | 25.848673000 | 12.408223000 | O  | 15.387165000 | 26.880900000 | 9.894590000  |
| O  | 12.408223000 | 25.848673000 | 14.472677000 | O  | 12.408223000 | 27.913127000 | 12.408223000 |
| Zr | 13.440450000 | 24.397374000 | 13.440450000 | O  | 15.387165000 | 26.880900000 | 16.986310000 |
| O  | 11.493735000 | 23.335040000 | 13.440450000 | Zr | 13.440450000 | 29.364426000 | 13.440450000 |
| C  | 10.287052000 | 23.727502000 | 13.440450000 | O  | 11.493735000 | 30.426760000 | 13.440450000 |
| O  | 15.387165000 | 23.335040000 | 13.440450000 | C  | 10.287052000 | 30.034298000 | 13.440450000 |
| C  | 16.593848000 | 23.727502000 | 13.440450000 | O  | 15.387165000 | 30.426760000 | 13.440450000 |
| C  | 17.650268000 | 22.671082000 | 13.440450000 | C  | 16.593848000 | 30.034298000 | 13.440450000 |
| C  | 19.634347000 | 20.687003000 | 13.440450000 | O  | 16.986310000 | 28.827615000 | 13.440450000 |
| C  | 18.960712000 | 22.988008000 | 13.761408000 | O  | 9.894590000  | 28.827615000 | 13.440450000 |
| C  | 19.936757000 | 22.003898000 | 13.776461000 | C  | 22.671082000 | 26.880900000 | 22.671082000 |
| H  | 19.144577000 | 23.999268000 | 13.924306000 | C  | 20.687003000 | 26.880900000 | 20.687003000 |
| H  | 20.830009000 | 22.313835000 | 14.037206000 | C  | 21.360638000 | 27.201858000 | 22.988008000 |
| O  | 9.894590000  | 24.934185000 | 13.440450000 | C  | 20.384593000 | 27.216911000 | 22.003898000 |
| O  | 16.986310000 | 24.934185000 | 13.440450000 | H  | 21.176773000 | 27.364756000 | 23.999268000 |
| C  | 17.333342000 | 21.360638000 | 13.119492000 | H  | 19.491341000 | 27.477656000 | 22.313835000 |
| C  | 18.317452000 | 20.384593000 | 13.104439000 | O  | 13.440450000 | 28.827615000 | 16.986310000 |
| H  | 16.322082000 | 21.176773000 | 12.956594000 | C  | 13.440450000 | 30.034298000 | 16.593848000 |
| H  | 18.007515000 | 19.491341000 | 12.843694000 | O  | 13.440450000 | 28.827615000 | 9.894590000  |
| C  | 22.988008000 | 26.559942000 | 21.360638000 | C  | 13.440450000 | 30.034298000 | 10.287052000 |
| C  | 22.003898000 | 26.544889000 | 20.384593000 | O  | 13.440450000 | 30.426760000 | 15.387165000 |
| H  | 23.999268000 | 26.397044000 | 21.176773000 | O  | 13.440450000 | 30.426760000 | 11.493735000 |
| H  | 22.313835000 | 26.284144000 | 19.491341000 | C  | 17.333342000 | 27.201858000 | 18.960712000 |
| C  | 22.671082000 | 17.650268000 | 13.440450000 | C  | 18.317452000 | 27.216911000 | 19.936757000 |
| C  | 20.687003000 | 19.634347000 | 13.440450000 | H  | 16.322082000 | 27.364756000 | 19.144577000 |



|              |              |              |              |    |              |              |              |
|--------------|--------------|--------------|--------------|----|--------------|--------------|--------------|
| H            | 18.007515000 | 27.477656000 | 20.830009000 | O  | 25.848911000 | 14.472433000 | 14.472432000 |
| H            | 13.440450000 | 30.790903000 | 9.530447000  | O  | 24.934197000 | 13.440504000 | 16.986469000 |
| H            | 17.350453000 | 26.880900000 | 9.530447000  | O  | 26.880944000 | 11.493774000 | 16.986500000 |
| H            | 17.350453000 | 30.790903000 | 13.440450000 | O  | 27.912892000 | 12.408463000 | 14.472437000 |
| H            | 13.440450000 | 30.790903000 | 17.350453000 | O  | 27.912782000 | 14.472319000 | 14.472318000 |
| H            | 9.530447000  | 30.790903000 | 13.440450000 | O  | 28.827591000 | 13.440433000 | 16.986482000 |
| H            | 9.530447000  | 26.880900000 | 17.350453000 | O  | 25.849015000 | 14.472322000 | 12.408582000 |
| H            | 13.440450000 | 22.970897000 | 9.530447000  | O  | 24.934203000 | 16.986468000 | 13.440501000 |
| H            | 9.530447000  | 22.970897000 | 13.440450000 | O  | 27.912889000 | 14.472431000 | 12.408464000 |
| H            | 13.440450000 | 22.970897000 | 17.350453000 | O  | 26.880945000 | 16.986494000 | 11.493769000 |
| H            | 15.026933000 | 25.294417000 | 11.853967000 | O  | 28.827591000 | 16.986480000 | 13.440428000 |
| H            | 11.853967000 | 28.467383000 | 11.853967000 | O  | 23.755332000 | 26.686089000 | 23.755213000 |
| H            | 9.530447000  | 26.880900000 | 9.530447000  | C  | 24.236612000 | 26.881475000 | 26.880552000 |
| H            | 15.026933000 | 28.467383000 | 15.026933000 | Zr | 26.880671000 | 29.524609000 | 26.880680000 |
| H            | 11.853967000 | 25.294417000 | 15.026933000 | Zr | 29.524440000 | 26.882357000 | 26.881381000 |
| H            | 26.711019000 | 23.845681000 | 20.900209000 | Zr | 27.064326000 | 30.008530000 | 23.753165000 |
| H            | 26.523458000 | 19.395445000 | 16.470802000 | C  | 30.008123000 | 27.066993000 | 23.753823000 |
| H            | 26.514856000 | 19.234945000 | 22.540008000 | C  | 23.755714000 | 23.756676000 | 26.684338000 |
| H            | 26.873662000 | 17.809869000 | 21.085882000 | C  | Zr           | 26.880615000 | 26.881402000 |
| H            | 26.612401000 | 21.079631000 | 24.186201000 | C  | 27.065914000 | 23.754135000 | 30.008060000 |
| H            | 26.896304000 | 16.148647000 | 19.251114000 | Zr | C            | 30.007964000 | 23.754748000 |
| Cu           | 26.287256000 | 21.892984000 | 18.227258000 | C  | Zr           | 24.236612000 | 13.440798000 |
| I            | 25.620748000 | 23.949076000 | 17.074077000 | Zr | Zr           | 26.880615000 | 10.797213000 |
| <b>b. PA</b> |              |              |              | C  | C            | 23.755714000 | 13.637012000 |
| N            | 26.513792000 | 21.866411000 | 20.406325000 | C  | C            | 27.065914000 | 10.313290000 |
| N            | 26.599793000 | 19.929708000 | 18.436610000 | Zr | Zr           | 29.524440000 | 13.439969000 |
| C            | 26.686713000 | 20.586554000 | 20.793804000 | C  | C            | 30.007964000 | 13.253783000 |
| C            | 26.541832000 | 22.844356000 | 21.319963000 | Zr | Zr           | 26.880671000 | 13.440670000 |
| C            | 26.602244000 | 19.002490000 | 17.460110000 | C  | C            | 23.755332000 | 16.566137000 |
| C            | 26.681256000 | 19.537355000 | 19.733306000 | C  | C            | 27.064326000 | 16.568185000 |
| C            | 26.856810000 | 20.277045000 | 22.152419000 | C  | C            | 30.008123000 | 16.567527000 |
| C            | 26.719119000 | 22.630540000 | 22.697640000 | O  | O            | 23.334855000 | 26.880866000 |
| C            | 26.713680000 | 17.624532000 | 17.688760000 | O  | O            | 23.334856000 | 24.934212000 |
| C            | 26.745470000 | 18.170681000 | 20.041224000 | O  | O            | 25.848909000 | 27.912895000 |
| C            | 26.865744000 | 21.294427000 | 23.094738000 | O  | O            | 23.334862000 | 26.880939000 |
| C            | 26.771855000 | 17.223937000 | 19.029878000 | O  | O            | 23.334864000 | 28.827596000 |
| C            | 26.809925000 | 23.730886000 | 23.728973000 | O  | O            | 24.934210000 | 30.426941000 |
| C            | 26.809925000 | 16.592377000 | 16.590464000 | O  | O            | 26.880889000 | 30.426939000 |
| O            | 26.880885000 | 24.934153000 | 23.334955000 | O  | O            | 26.880879000 | 30.426942000 |
| O            | 26.880903000 | 23.334945000 | 24.934136000 | O  | O            | 27.912786000 | 27.912776000 |
| O            | 26.880903000 | 15.387214000 | 16.986405000 | O  | O            | 28.827596000 | 30.426944000 |
| O            | 26.880885000 | 16.986395000 | 15.387197000 | O  | O            | 30.426933000 | 24.934198000 |
| Zr           | 26.878142000 | 26.881612000 | 24.237883000 | O  | O            | 30.426936000 | 26.880929000 |
| Zr           | 26.878209000 | 24.239690000 | 26.880717000 | O  | O            | 30.426944000 | 26.880866000 |
| Zr           | 26.878209000 | 13.440633000 | 16.081660000 | O  | O            | 30.426946000 | 28.827594000 |
| Zr           | 26.878142000 | 16.083467000 | 13.439738000 | O  | O            | 24.934211000 | 26.880924000 |
| O            | 24.934203000 | 26.880849000 | 23.334882000 | O  | O            | 26.880889000 | 24.934201000 |
| O            | 25.848911000 | 25.848918000 | 25.848917000 | O  | O            | 28.827598000 | 26.880862000 |
| O            | 25.849015000 | 27.912768000 | 25.849028000 | O  | O            | 25.848909000 | 12.408453000 |
| O            | 27.912782000 | 25.849032000 | 25.849031000 | O  | O            | 23.334862000 | 11.493756000 |
| O            | 27.912889000 | 27.912886000 | 25.848919000 | O  | O            | 24.934211000 | 9.894408000  |
| O            | 26.880945000 | 28.827581000 | 23.334856000 | O  | O            | 26.880889000 | 9.894413000  |
| O            | 28.827591000 | 26.880922000 | 23.334870000 | O  | O            | 27.912786000 | 12.408573000 |
| O            | 24.934197000 | 23.334881000 | 26.880846000 | O  | O            | 14.472325000 |              |
| O            | 25.849012000 | 25.849025000 | 27.912771000 |    |              |              |              |
| O            | 27.912892000 | 25.848913000 | 27.912887000 |    |              |              |              |
| O            | 26.880944000 | 23.334850000 | 28.827576000 |    |              |              |              |
| O            | 28.827591000 | 23.334868000 | 26.880917000 |    |              |              |              |
| O            | 25.849012000 | 12.408579000 | 14.472325000 |    |              |              |              |

## ARTICLE

## Journal Name

|    |              |              |              |    |              |              |              |
|----|--------------|--------------|--------------|----|--------------|--------------|--------------|
| O  | 26.880878000 | 9.894407000  | 11.493761000 | C  | 17.650268000 | 22.671082000 | 13.440450000 |
| O  | 28.827598000 | 9.894410000  | 13.440488000 | C  | 19.634347000 | 20.687003000 | 13.440450000 |
| O  | 30.426944000 | 11.493755000 | 13.440484000 | C  | 18.960712000 | 22.988008000 | 13.761408000 |
| O  | 30.426936000 | 15.387151000 | 13.440421000 | C  | 19.936757000 | 22.003898000 | 13.776461000 |
| O  | 30.426946000 | 13.440483000 | 11.493756000 | H  | 19.144577000 | 23.999268000 | 13.924306000 |
| O  | 30.426933000 | 13.440426000 | 15.387152000 | H  | 20.830009000 | 22.313835000 | 14.037206000 |
| O  | 24.934210000 | 13.440425000 | 9.894409000  | O  | 9.894590000  | 24.934185000 | 13.440450000 |
| O  | 26.880879000 | 11.493760000 | 9.894408000  | O  | 16.986310000 | 24.934185000 | 13.440450000 |
| O  | 26.880889000 | 15.387147000 | 9.894411000  | C  | 17.333342000 | 21.360638000 | 13.119492000 |
| O  | 28.827596000 | 13.440487000 | 9.894406000  | C  | 18.317452000 | 20.384593000 | 13.104439000 |
| C  | 23.753697000 | 27.066116000 | 30.007949000 | H  | 16.322082000 | 21.176773000 | 12.956594000 |
| C  | 23.753135000 | 30.008630000 | 27.063604000 | H  | 18.007515000 | 19.491341000 | 12.843694000 |
| C  | 26.696398000 | 30.008246000 | 30.008106000 | C  | 22.988008000 | 26.559942000 | 21.360638000 |
| C  | 30.007968000 | 30.008237000 | 26.695581000 | C  | 22.003898000 | 26.544889000 | 20.384593000 |
| C  | 30.008286000 | 26.697416000 | 30.008420000 | H  | 23.999268000 | 26.397044000 | 21.176773000 |
| C  | 23.753697000 | 10.313401000 | 13.255234000 | H  | 22.313835000 | 26.284144000 | 19.491341000 |
| C  | 23.753135000 | 13.257746000 | 10.312720000 | C  | 22.671082000 | 17.650268000 | 13.440450000 |
| C  | 26.696398000 | 10.313244000 | 10.313104000 | C  | 20.687003000 | 19.634347000 | 13.440450000 |
| C  | 30.008286000 | 10.312930000 | 13.623934000 | O  | 13.440450000 | 24.934185000 | 9.894590000  |
| C  | 30.007968000 | 13.625768000 | 10.313113000 | C  | 13.440450000 | 23.727502000 | 10.287052000 |
| H  | 27.351814000 | 30.759513000 | 23.002127000 | O  | 13.440450000 | 24.934185000 | 16.986310000 |
| H  | 30.758179000 | 27.358190000 | 23.003211000 | C  | 13.440450000 | 23.727502000 | 16.593848000 |
| H  | 23.008991000 | 23.009158000 | 26.377462000 | O  | 13.440450000 | 23.335040000 | 15.387165000 |
| H  | 27.355985000 | 23.003402000 | 30.758391000 | O  | 13.440450000 | 23.335040000 | 11.493735000 |
| H  | 30.757581000 | 23.004153000 | 27.359935000 | C  | 18.960712000 | 26.559942000 | 17.333342000 |
| H  | 23.008991000 | 13.943888000 | 17.312192000 | C  | 19.936757000 | 26.544889000 | 18.317452000 |
| H  | 27.355985000 | 9.562959000  | 17.317948000 | H  | 19.144577000 | 26.397044000 | 16.322082000 |
| H  | 30.757582000 | 12.961415000 | 17.317197000 | H  | 20.830009000 | 26.284144000 | 18.007515000 |
| H  | 27.351814000 | 17.319223000 | 9.561837000  | C  | 21.360638000 | 17.333342000 | 13.119492000 |
| H  | 30.758179000 | 17.318139000 | 12.963160000 | C  | 20.384593000 | 18.317452000 | 13.104439000 |
| H  | 23.003255000 | 27.356162000 | 30.758555000 | H  | 21.176773000 | 16.322082000 | 12.956594000 |
| H  | 23.001913000 | 30.759916000 | 27.349810000 | H  | 19.491341000 | 18.007515000 | 12.843694000 |
| H  | 26.407446000 | 30.758917000 | 30.758911000 | C  | 22.988008000 | 18.960712000 | 13.761408000 |
| H  | 30.758582000 | 30.758568000 | 26.405278000 | C  | 22.003898000 | 19.936757000 | 13.776461000 |
| H  | 30.759373000 | 26.409850000 | 30.759355000 | H  | 23.999268000 | 19.144577000 | 13.924306000 |
| H  | 23.003255000 | 9.562795000  | 12.965188000 | H  | 22.313835000 | 20.830009000 | 14.037206000 |
| H  | 23.001913000 | 12.971540000 | 9.561434000  | Zr | 10.956924000 | 26.880900000 | 13.440450000 |
| H  | 26.407446000 | 9.562439000  | 9.562434000  | O  | 9.894590000  | 26.880900000 | 11.493735000 |
| H  | 30.759373000 | 9.561995000  | 13.911500000 | O  | 12.408223000 | 27.913127000 | 14.472677000 |
| H  | 30.758582000 | 13.916071000 | 9.562782000  | C  | 10.287052000 | 26.880900000 | 10.287052000 |
| H  | 25.215026000 | 11.776433000 | 15.102845000 | Zr | 15.923976000 | 26.880900000 | 13.440450000 |
| H  | 28.544134000 | 11.776251000 | 11.775822000 | O  | 16.986310000 | 26.880900000 | 11.493735000 |
| H  | 28.555271000 | 15.099035000 | 15.098322000 | C  | 16.593848000 | 26.880900000 | 10.287052000 |
| H  | 25.215244000 | 15.103495000 | 11.776660000 | O  | 16.986310000 | 26.880900000 | 15.387165000 |
| H  | 25.215244000 | 28.544690000 | 25.217855000 | O  | 14.472677000 | 27.913127000 | 12.408223000 |
| H  | 28.555271000 | 25.223028000 | 25.222315000 | C  | 16.593848000 | 26.880900000 | 16.593848000 |
| H  | 28.544134000 | 28.545528000 | 28.545099000 | C  | 17.650268000 | 26.880900000 | 17.650268000 |
| H  | 25.215026000 | 25.218505000 | 28.544917000 | C  | 19.634347000 | 26.880900000 | 19.634347000 |
| O  | 14.472677000 | 25.848673000 | 14.472677000 | O  | 9.894590000  | 26.880900000 | 15.387165000 |
| O  | 12.408223000 | 25.848673000 | 12.408223000 | C  | 10.287052000 | 26.880900000 | 16.593848000 |
| O  | 14.472677000 | 25.848673000 | 12.408223000 | Zr | 13.440450000 | 26.880900000 | 15.923976000 |
| O  | 12.408223000 | 25.848673000 | 14.472677000 | O  | 11.493735000 | 26.880900000 | 16.986310000 |
| Zr | 13.440450000 | 24.397374000 | 13.440450000 | O  | 14.472677000 | 27.913127000 | 14.472677000 |
| O  | 11.493735000 | 23.335040000 | 13.440450000 | Zr | 13.440450000 | 26.880900000 | 10.956924000 |
| C  | 10.287052000 | 23.727502000 | 13.440450000 | O  | 11.493735000 | 26.880900000 | 9.894590000  |
| O  | 15.387165000 | 23.335040000 | 13.440450000 | O  | 15.387165000 | 26.880900000 | 9.894590000  |
| C  | 16.593848000 | 23.727502000 | 13.440450000 | O  | 12.408223000 | 27.913127000 | 12.408223000 |

| Journal Name     |              |              |              | ARTICLE |              |              |              |
|------------------|--------------|--------------|--------------|---------|--------------|--------------|--------------|
| O                | 15.387165000 | 26.880900000 | 16.986310000 | C       | 26.651869000 | 20.598321000 | 20.777256000 |
| Zr               | 13.440450000 | 29.364426000 | 13.440450000 | C       | 26.582311000 | 22.857133000 | 21.304991000 |
| O                | 11.493735000 | 30.426760000 | 13.440450000 | C       | 26.731675000 | 18.995649000 | 17.453943000 |
| C                | 10.287052000 | 30.034298000 | 13.440450000 | C       | 26.634864000 | 19.542065000 | 19.722018000 |
| O                | 15.387165000 | 30.426760000 | 13.440450000 | C       | 26.795229000 | 20.280885000 | 22.137326000 |
| C                | 16.593848000 | 30.034298000 | 13.440450000 | C       | 26.715262000 | 22.634408000 | 22.688213000 |
| O                | 16.986310000 | 28.827615000 | 13.440450000 | C       | 26.692569000 | 17.619007000 | 17.689125000 |
| O                | 9.894590000  | 28.827615000 | 13.440450000 | C       | 26.520054000 | 18.177310000 | 20.032033000 |
| C                | 22.671082000 | 26.880900000 | 22.671082000 | C       | 26.815392000 | 21.294619000 | 23.084975000 |
| C                | 20.687003000 | 26.880900000 | 20.687003000 | C       | 26.570963000 | 17.221841000 | 19.028140000 |
| C                | 21.360638000 | 27.201858000 | 22.988008000 | C       | 26.809925000 | 23.730886000 | 23.728973000 |
| C                | 20.384593000 | 27.216911000 | 22.003898000 | C       | 26.809925000 | 16.592377000 | 16.590464000 |
| H                | 21.176773000 | 27.364756000 | 23.999268000 | O       | 26.880885000 | 24.934153000 | 23.334955000 |
| H                | 19.491341000 | 27.477656000 | 22.313835000 | O       | 26.880903000 | 23.334945000 | 24.934136000 |
| O                | 13.440450000 | 28.827615000 | 16.986310000 | O       | 26.880903000 | 15.387214000 | 16.986405000 |
| C                | 13.440450000 | 30.034298000 | 16.593848000 | O       | 26.880885000 | 16.986395000 | 15.387197000 |
| O                | 13.440450000 | 28.827615000 | 9.894590000  | Zr      | 26.878142000 | 26.881612000 | 24.237883000 |
| C                | 13.440450000 | 30.034298000 | 10.287052000 | Zr      | 26.878209000 | 24.239690000 | 26.880717000 |
| O                | 13.440450000 | 30.426760000 | 15.387165000 | Zr      | 26.878209000 | 13.440633000 | 16.081660000 |
| O                | 13.440450000 | 30.426760000 | 11.493735000 | Zr      | 26.878142000 | 16.083467000 | 13.439738000 |
| C                | 17.333342000 | 27.201858000 | 18.960712000 | O       | 24.934203000 | 26.880849000 | 23.334882000 |
| C                | 18.317452000 | 27.216911000 | 19.936757000 | O       | 25.848911000 | 25.848918000 | 25.848917000 |
| H                | 16.322082000 | 27.364756000 | 19.144577000 | O       | 25.849015000 | 27.912768000 | 25.849028000 |
| H                | 18.007515000 | 27.477656000 | 20.830009000 | O       | 27.912782000 | 25.849032000 | 25.849031000 |
| H                | 13.440450000 | 30.790903000 | 9.530447000  | O       | 27.912889000 | 27.912886000 | 25.848919000 |
| H                | 17.350453000 | 26.880900000 | 9.530447000  | O       | 26.880945000 | 28.827581000 | 23.334856000 |
| H                | 17.350453000 | 30.790903000 | 13.440450000 | O       | 28.827591000 | 26.880922000 | 23.334870000 |
| H                | 13.440450000 | 30.790903000 | 17.350453000 | O       | 24.934197000 | 23.334881000 | 26.880846000 |
| H                | 9.530447000  | 30.790903000 | 13.440450000 | O       | 25.849012000 | 25.849025000 | 27.912771000 |
| H                | 9.530447000  | 26.880900000 | 17.350453000 | O       | 27.912892000 | 25.848913000 | 27.912887000 |
| H                | 13.440450000 | 22.970897000 | 9.530447000  | O       | 26.880944000 | 23.334850000 | 28.827576000 |
| H                | 9.530447000  | 22.970897000 | 13.440450000 | O       | 28.827591000 | 23.334868000 | 26.880917000 |
| H                | 13.440450000 | 22.970897000 | 17.350453000 | O       | 25.849012000 | 12.408579000 | 14.472325000 |
| H                | 15.026933000 | 25.294417000 | 11.853967000 | O       | 25.848911000 | 14.472433000 | 14.472432000 |
| H                | 11.853967000 | 28.467383000 | 11.853967000 | O       | 24.934197000 | 13.440504000 | 16.986469000 |
| H                | 9.530447000  | 26.880900000 | 9.530447000  | O       | 26.880944000 | 11.493774000 | 16.986500000 |
| H                | 15.026933000 | 28.467383000 | 15.026933000 | O       | 27.912892000 | 12.408463000 | 14.472437000 |
| H                | 11.853967000 | 25.294417000 | 15.026933000 | O       | 27.912782000 | 14.472319000 | 14.472318000 |
| H                | 26.409890000 | 23.854924000 | 20.937766000 | O       | 28.827591000 | 13.440433000 | 16.986482000 |
| H                | 26.502764000 | 19.382346000 | 16.447256000 | O       | 25.849015000 | 14.472322000 | 12.408582000 |
| H                | 26.993833000 | 19.252248000 | 22.480586000 | O       | 24.934203000 | 16.986468000 | 13.440501000 |
| H                | 26.766452000 | 17.841560000 | 21.074118000 | O       | 27.912889000 | 14.472431000 | 12.408464000 |
| H                | 27.002633000 | 21.074185000 | 24.147107000 | O       | 26.880945000 | 16.986494000 | 11.493769000 |
| H                | 26.837052000 | 16.166489000 | 19.258506000 | O       | 28.827591000 | 16.986480000 | 13.440428000 |
| Cu               | 26.128402000 | 21.902047000 | 18.029104000 | C       | 23.755332000 | 26.686089000 | 23.755213000 |
| I                | 23.557889000 | 21.697913000 | 17.851415000 | Zr      | 24.236612000 | 26.881475000 | 26.880552000 |
| C                | 26.621752000 | 23.690026000 | 17.300085000 | Zr      | 26.880671000 | 29.524609000 | 26.880680000 |
| C                | 27.656820000 | 22.991730000 | 17.359901000 | Zr      | 29.524440000 | 26.882357000 | 26.881381000 |
| H                | 28.689995000 | 22.710795000 | 17.297758000 | C       | 27.064326000 | 30.008530000 | 23.753165000 |
| C                | 25.689569000 | 24.800771000 | 17.028005000 | C       | 30.008123000 | 27.066993000 | 23.753823000 |
| H                | 25.566777000 | 25.383601000 | 17.947551000 | C       | 23.755714000 | 23.756676000 | 26.684338000 |
| H                | 24.698887000 | 24.393920000 | 16.781187000 | Zr      | 26.880615000 | 26.881402000 | 29.524137000 |
| O                | 26.178247000 | 25.703498000 | 16.056783000 | C       | 27.065914000 | 23.754135000 | 30.008060000 |
| H                | 26.163339000 | 25.253052000 | 15.215790000 | C       | 30.007964000 | 23.754748000 | 27.067567000 |
| <b>c. PA/DBU</b> |              |              |              | Zr      | 24.236612000 | 13.440798000 | 13.439875000 |
| N                | 26.538138000 | 21.884132000 | 20.384017000 | Zr      | 26.880615000 | 10.797213000 | 13.439948000 |
| N                | 26.736835000 | 19.926164000 | 18.427497000 | C       | 23.755714000 | 13.637012000 | 16.564674000 |

## ARTICLE

## Journal Name

|    |              |              |              |    |              |              |              |
|----|--------------|--------------|--------------|----|--------------|--------------|--------------|
| C  | 27.065914000 | 10.313290000 | 16.567215000 | H  | 30.757581000 | 23.004153000 | 27.359935000 |
| Zr | 29.524440000 | 13.439969000 | 13.438993000 | H  | 23.008991000 | 13.943888000 | 17.312192000 |
| C  | 30.007964000 | 13.253783000 | 16.566602000 | H  | 27.355985000 | 9.562959000  | 17.317948000 |
| Zr | 26.880671000 | 13.440670000 | 10.796741000 | H  | 30.757582000 | 12.961415000 | 17.317197000 |
| C  | 23.755332000 | 16.566137000 | 13.635261000 | H  | 27.351814000 | 17.319223000 | 9.561837000  |
| C  | 27.064326000 | 16.568185000 | 10.312820000 | H  | 30.758179000 | 17.318139000 | 12.963160000 |
| C  | 30.008123000 | 16.567527000 | 13.254357000 | H  | 23.003255000 | 27.356162000 | 30.758555000 |
| O  | 23.334855000 | 26.880866000 | 24.934215000 | H  | 23.001913000 | 30.759916000 | 27.349810000 |
| O  | 23.334856000 | 24.934212000 | 26.880862000 | H  | 26.407446000 | 30.758917000 | 30.758911000 |
| O  | 25.848909000 | 27.912895000 | 27.912897000 | H  | 30.758582000 | 30.758568000 | 26.405278000 |
| O  | 23.334862000 | 26.880939000 | 28.827594000 | H  | 30.759373000 | 26.409850000 | 30.759355000 |
| O  | 23.334864000 | 28.827596000 | 26.880937000 | H  | 23.003255000 | 9.562795000  | 12.965188000 |
| O  | 24.934210000 | 30.426941000 | 26.880925000 | H  | 23.001913000 | 12.971540000 | 9.561434000  |
| O  | 26.880889000 | 30.426939000 | 24.934203000 | H  | 26.407446000 | 9.562439000  | 9.562434000  |
| O  | 26.880879000 | 30.426942000 | 28.827590000 | H  | 30.759373000 | 9.561995000  | 13.911500000 |
| O  | 27.912786000 | 27.912776000 | 27.912777000 | H  | 30.758582000 | 13.916071000 | 9.562782000  |
| O  | 28.827596000 | 30.426944000 | 26.880863000 | H  | 25.215026000 | 11.776433000 | 15.102845000 |
| O  | 30.426933000 | 24.934198000 | 26.880924000 | H  | 28.544134000 | 11.776251000 | 11.775822000 |
| O  | 30.426936000 | 26.880929000 | 24.934199000 | H  | 28.555271000 | 15.099035000 | 15.098322000 |
| O  | 30.426944000 | 26.880866000 | 28.827595000 | H  | 25.215244000 | 15.103495000 | 11.776660000 |
| O  | 30.426946000 | 28.827594000 | 26.880867000 | H  | 25.215244000 | 28.544690000 | 25.217855000 |
| O  | 24.934211000 | 26.880924000 | 30.426942000 | H  | 28.555271000 | 25.223028000 | 25.222315000 |
| O  | 26.880889000 | 24.934201000 | 30.426937000 | H  | 28.544134000 | 28.545528000 | 28.545099000 |
| O  | 26.880878000 | 28.827589000 | 30.426943000 | H  | 25.215026000 | 25.218505000 | 28.544917000 |
| O  | 28.827598000 | 26.880862000 | 30.426940000 | O  | 14.472677000 | 25.848673000 | 14.472677000 |
| O  | 25.848909000 | 12.408453000 | 12.408455000 | O  | 12.408223000 | 25.848673000 | 12.408223000 |
| O  | 23.334862000 | 11.493756000 | 13.440411000 | O  | 14.472677000 | 25.848673000 | 12.408223000 |
| O  | 23.334855000 | 15.387135000 | 13.440484000 | O  | 12.408223000 | 25.848673000 | 14.472677000 |
| O  | 23.334864000 | 13.440413000 | 11.493754000 | Zr | 13.440450000 | 24.397374000 | 13.440450000 |
| O  | 23.334856000 | 13.440488000 | 15.387138000 | O  | 11.493735000 | 23.335040000 | 13.440450000 |
| O  | 24.934211000 | 9.894408000  | 13.440426000 | C  | 10.287052000 | 23.727502000 | 13.440450000 |
| O  | 26.880889000 | 9.894413000  | 15.387149000 | O  | 15.387165000 | 23.335040000 | 13.440450000 |
| O  | 27.912786000 | 12.408573000 | 12.408574000 | C  | 16.593848000 | 23.727502000 | 13.440450000 |
| O  | 26.880878000 | 9.894407000  | 11.493761000 | C  | 17.650268000 | 22.671082000 | 13.440450000 |
| O  | 28.827598000 | 9.894410000  | 13.440488000 | C  | 19.634347000 | 20.687003000 | 13.440450000 |
| O  | 30.426944000 | 11.493755000 | 13.440484000 | C  | 18.960712000 | 22.988008000 | 13.761408000 |
| O  | 30.426936000 | 15.387151000 | 13.440421000 | C  | 19.936757000 | 22.003898000 | 13.776461000 |
| O  | 30.426946000 | 13.440483000 | 11.493756000 | H  | 19.144577000 | 23.999268000 | 13.924306000 |
| O  | 30.426933000 | 13.440426000 | 15.387152000 | H  | 20.830009000 | 22.313835000 | 14.037206000 |
| O  | 24.934210000 | 13.440425000 | 9.894409000  | O  | 9.894590000  | 24.934185000 | 13.440450000 |
| O  | 26.880879000 | 11.493760000 | 9.894408000  | O  | 16.986310000 | 24.934185000 | 13.440450000 |
| O  | 26.880889000 | 15.387147000 | 9.894411000  | C  | 17.333342000 | 21.360638000 | 13.119492000 |
| O  | 28.827596000 | 13.440487000 | 9.894406000  | C  | 18.317452000 | 20.384593000 | 13.104439000 |
| C  | 23.753697000 | 27.066116000 | 30.007949000 | H  | 16.322082000 | 21.176773000 | 12.956594000 |
| C  | 23.753135000 | 30.008630000 | 27.063604000 | H  | 18.007515000 | 19.491341000 | 12.843694000 |
| C  | 26.696398000 | 30.008246000 | 30.008106000 | C  | 22.988008000 | 26.559942000 | 21.360638000 |
| C  | 30.007968000 | 30.008237000 | 26.695581000 | C  | 22.003898000 | 26.544889000 | 20.384593000 |
| C  | 30.008286000 | 26.697416000 | 30.008420000 | H  | 23.999268000 | 26.397044000 | 21.176773000 |
| C  | 23.753697000 | 10.313401000 | 13.255234000 | H  | 22.313835000 | 26.284144000 | 19.491341000 |
| C  | 23.753135000 | 13.257746000 | 10.312720000 | C  | 22.671082000 | 17.650268000 | 13.440450000 |
| C  | 26.696398000 | 10.313244000 | 10.313104000 | C  | 20.687003000 | 19.634347000 | 13.440450000 |
| C  | 30.008286000 | 10.312930000 | 13.623934000 | O  | 13.440450000 | 24.934185000 | 9.894590000  |
| C  | 30.007968000 | 13.625768000 | 10.313113000 | C  | 13.440450000 | 23.727502000 | 10.287052000 |
| H  | 27.351814000 | 30.759513000 | 23.002127000 | O  | 13.440450000 | 24.934185000 | 16.986310000 |
| H  | 30.758179000 | 27.358190000 | 23.003211000 | C  | 13.440450000 | 23.727502000 | 16.593848000 |
| H  | 23.008991000 | 23.009158000 | 26.377462000 | O  | 13.440450000 | 23.335040000 | 15.387165000 |
| H  | 27.355985000 | 23.003402000 | 30.758391000 | O  | 13.440450000 | 23.335040000 | 11.493735000 |

| Journal Name |              |              |              | ARTICLE |              |              |              |
|--------------|--------------|--------------|--------------|---------|--------------|--------------|--------------|
| C            | 18.960712000 | 26.559942000 | 17.333342000 | H       | 13.440450000 | 30.790903000 | 9.530447000  |
| C            | 19.936757000 | 26.544889000 | 18.317452000 | H       | 17.350453000 | 26.880900000 | 9.530447000  |
| H            | 19.144577000 | 26.397044000 | 16.322082000 | H       | 17.350453000 | 30.790903000 | 13.440450000 |
| H            | 20.830009000 | 26.284144000 | 18.007515000 | H       | 13.440450000 | 30.790903000 | 17.350453000 |
| C            | 21.360638000 | 17.333342000 | 13.119492000 | H       | 9.530447000  | 30.790903000 | 13.440450000 |
| C            | 20.384593000 | 18.317452000 | 13.104439000 | H       | 9.530447000  | 26.880900000 | 17.350453000 |
| H            | 21.176773000 | 16.322082000 | 12.956594000 | H       | 13.440450000 | 22.970897000 | 9.530447000  |
| H            | 19.491341000 | 18.007515000 | 12.843694000 | H       | 9.530447000  | 22.970897000 | 13.440450000 |
| C            | 22.988008000 | 18.960712000 | 13.761408000 | H       | 13.440450000 | 22.970897000 | 17.350453000 |
| C            | 22.003898000 | 19.936757000 | 13.776461000 | H       | 15.026933000 | 25.294417000 | 11.853967000 |
| H            | 23.999268000 | 19.144577000 | 13.924306000 | H       | 11.853967000 | 28.467383000 | 11.853967000 |
| H            | 22.313835000 | 20.830009000 | 14.037206000 | H       | 9.530447000  | 26.880900000 | 9.530447000  |
| Zr           | 10.956924000 | 26.880900000 | 13.440450000 | H       | 15.026933000 | 28.467383000 | 15.026933000 |
| O            | 9.894590000  | 26.880900000 | 11.493735000 | H       | 11.853967000 | 25.294417000 | 15.026933000 |
| O            | 12.408223000 | 27.913127000 | 14.472677000 | H       | 26.506281000 | 23.873943000 | 20.922641000 |
| C            | 10.287052000 | 26.880900000 | 10.287052000 | H       | 26.756339000 | 19.376896000 | 16.436005000 |
| Zr           | 15.923976000 | 26.880900000 | 13.440450000 | H       | 26.913176000 | 19.251643000 | 22.460256000 |
| O            | 16.986310000 | 26.880900000 | 11.493735000 | H       | 26.385073000 | 17.859983000 | 21.060344000 |
| C            | 16.593848000 | 26.880900000 | 10.287052000 | H       | 26.929122000 | 21.065489000 | 24.139864000 |
| O            | 16.986310000 | 26.880900000 | 15.387165000 | H       | 26.511769000 | 16.163760000 | 19.262837000 |
| O            | 14.472677000 | 27.913127000 | 12.408223000 | Cu      | 26.722708000 | 21.905801000 | 17.852488000 |
| C            | 16.593848000 | 26.880900000 | 16.593848000 | I       | 24.519574000 | 21.797035000 | 16.462344000 |
| C            | 17.650268000 | 26.880900000 | 17.650268000 | C       | 27.680515000 | 23.580548000 | 17.308274000 |
| C            | 19.634347000 | 26.880900000 | 19.634347000 | C       | 28.479754000 | 22.835741000 | 17.916035000 |
| O            | 9.894590000  | 26.880900000 | 15.387165000 | H       | 29.381871000 | 22.490848000 | 18.382378000 |
| C            | 10.287052000 | 26.880900000 | 16.593848000 | C       | 27.126103000 | 24.679863000 | 16.482378000 |
| Zr           | 13.440450000 | 26.880900000 | 15.923976000 | H       | 26.716533000 | 25.441192000 | 17.157967000 |
| O            | 11.493735000 | 26.880900000 | 16.986310000 | H       | 26.272120000 | 24.280562000 | 15.911012000 |
| O            | 14.472677000 | 27.913127000 | 14.472677000 | O       | 28.096093000 | 25.280311000 | 15.676741000 |
| Zr           | 13.440450000 | 26.880900000 | 10.956924000 | H       | 28.342752000 | 24.578411000 | 15.020677000 |
| O            | 11.493735000 | 26.880900000 | 9.894590000  | C       | 26.601592000 | 22.873433000 | 10.761235000 |
| O            | 15.387165000 | 26.880900000 | 9.894590000  | C       | 26.019796000 | 23.952018000 | 11.670908000 |
| O            | 12.408223000 | 27.913127000 | 12.408223000 | C       | 26.233430000 | 23.716936000 | 13.186970000 |
| O            | 15.387165000 | 26.880900000 | 16.986310000 | C       | 25.932670000 | 21.510047000 | 10.902653000 |
| Zr           | 13.440450000 | 29.364426000 | 13.440450000 | C       | 27.238890000 | 22.649792000 | 13.531690000 |
| O            | 11.493735000 | 30.426760000 | 13.440450000 | C       | 25.735631000 | 21.098847000 | 12.361245000 |
| C            | 10.287052000 | 30.034298000 | 13.440450000 | N       | 26.900719000 | 21.367193000 | 13.189513000 |
| O            | 15.387165000 | 30.426760000 | 13.440450000 | H       | 26.542248000 | 23.202365000 | 9.717783000  |
| C            | 16.593848000 | 30.034298000 | 13.440450000 | H       | 26.534417000 | 20.754017000 | 10.381178000 |
| O            | 16.986310000 | 28.827615000 | 13.440450000 | C       | 29.296025000 | 21.961921000 | 14.437287000 |
| O            | 9.894590000  | 28.827615000 | 13.440450000 | N       | 28.342295000 | 23.009330000 | 14.116410000 |
| C            | 22.671082000 | 26.880900000 | 22.671082000 | C       | 28.608846000 | 20.647470000 | 14.762638000 |
| C            | 20.687003000 | 26.880900000 | 20.687003000 | C       | 27.716006000 | 20.239298000 | 13.609821000 |
| C            | 21.360638000 | 27.201858000 | 22.988008000 | H       | 27.041848000 | 19.424338000 | 13.911709000 |
| C            | 20.384593000 | 27.216911000 | 22.003898000 | H       | 29.900885000 | 22.300003000 | 15.287684000 |
| H            | 21.176773000 | 27.364756000 | 23.999268000 | H       | 27.673104000 | 22.771666000 | 10.980425000 |
| H            | 19.491341000 | 27.477656000 | 22.313835000 | H       | 24.949832000 | 21.514586000 | 10.413469000 |
| O            | 13.440450000 | 28.827615000 | 16.986310000 | H       | 28.313528000 | 19.854189000 | 12.767066000 |
| C            | 13.440450000 | 30.034298000 | 16.593848000 | H       | 29.994659000 | 21.827942000 | 13.594990000 |
| O            | 13.440450000 | 28.827615000 | 9.894590000  | H       | 24.947251000 | 24.062779000 | 11.467284000 |
| C            | 13.440450000 | 30.034298000 | 10.287052000 | H       | 26.475497000 | 24.909072000 | 11.397759000 |
| O            | 13.440450000 | 30.426760000 | 15.387165000 | H       | 29.318174000 | 19.842991000 | 14.988472000 |
| O            | 13.440450000 | 30.426760000 | 11.493735000 | H       | 27.993143000 | 20.814891000 | 15.657646000 |
| C            | 17.333342000 | 27.201858000 | 18.960712000 | H       | 26.586363000 | 24.635854000 | 13.661387000 |
| C            | 18.317452000 | 27.216911000 | 19.936757000 | H       | 25.287326000 | 23.457011000 | 13.679168000 |
| H            | 16.322082000 | 27.364756000 | 19.144577000 | H       | 24.860692000 | 21.602997000 | 12.790908000 |
| H            | 18.007515000 | 27.477656000 | 20.830009000 | H       | 25.533541000 | 20.026817000 | 12.423162000 |

| d. PA/DBU/CO <sub>2</sub> |              |              |              |    |              |              |              |
|---------------------------|--------------|--------------|--------------|----|--------------|--------------|--------------|
| N                         | 26.501713000 | 21.872616000 | 20.394452000 | Zr | 24.236612000 | 13.440798000 | 13.439875000 |
| N                         | 26.731379000 | 19.927277000 | 18.436371000 | Zr | 26.880615000 | 10.797213000 | 13.439948000 |
| C                         | 26.642125000 | 20.589156000 | 20.786885000 | C  | 23.755714000 | 13.637012000 | 16.564674000 |
| C                         | 26.549906000 | 22.849850000 | 21.310902000 | C  | 27.065914000 | 10.313290000 | 16.567215000 |
| C                         | 26.736246000 | 18.999630000 | 17.459531000 | Zr | 29.524440000 | 13.439969000 | 13.438993000 |
| C                         | 26.628901000 | 19.535989000 | 19.729729000 | C  | 30.007964000 | 13.253783000 | 16.566602000 |
| C                         | 26.812355000 | 20.276836000 | 22.144616000 | Zr | 26.880671000 | 13.440670000 | 10.796741000 |
| C                         | 26.711674000 | 22.631836000 | 22.691032000 | C  | 23.755332000 | 16.566137000 | 13.635261000 |
| C                         | 26.694162000 | 17.621092000 | 17.689801000 | C  | 27.064326000 | 16.568185000 | 10.312820000 |
| C                         | 26.518731000 | 18.170594000 | 20.035234000 | C  | 30.008123000 | 16.567527000 | 13.254357000 |
| C                         | 26.834773000 | 21.293792000 | 23.088962000 | O  | 23.334855000 | 26.880866000 | 24.934215000 |
| C                         | 26.569455000 | 17.219409000 | 19.027313000 | O  | 23.334856000 | 24.934212000 | 26.880862000 |
| C                         | 26.809925000 | 23.730886000 | 23.728973000 | O  | 25.848909000 | 27.912895000 | 27.912897000 |
| C                         | 26.809925000 | 16.592377000 | 16.590464000 | O  | 23.334862000 | 26.880939000 | 28.827594000 |
| O                         | 26.880885000 | 24.934153000 | 23.334955000 | O  | 23.334864000 | 28.827596000 | 26.880937000 |
| O                         | 26.880903000 | 23.334945000 | 24.934136000 | O  | 24.934210000 | 30.426941000 | 26.880925000 |
| O                         | 26.880903000 | 15.387214000 | 16.986405000 | O  | 26.880889000 | 30.426939000 | 24.934203000 |
| O                         | 26.880885000 | 16.986395000 | 15.387197000 | O  | 26.880879000 | 30.426942000 | 28.827590000 |
| Zr                        | 26.878142000 | 26.881612000 | 24.237883000 | O  | 27.912786000 | 27.912776000 | 27.912777000 |
| Zr                        | 26.878209000 | 24.239690000 | 26.880717000 | O  | 28.827596000 | 30.426944000 | 26.880863000 |
| Zr                        | 26.878209000 | 13.440633000 | 16.081660000 | O  | 30.426933000 | 24.934198000 | 26.880924000 |
| Zr                        | 26.878142000 | 16.083467000 | 13.439738000 | O  | 30.426936000 | 26.880929000 | 24.934199000 |
| O                         | 24.934203000 | 26.880849000 | 23.334882000 | O  | 30.426944000 | 26.880866000 | 28.827595000 |
| O                         | 25.848911000 | 25.848918000 | 25.848917000 | O  | 30.426946000 | 28.827594000 | 26.880867000 |
| O                         | 25.849015000 | 27.912768000 | 25.849028000 | O  | 24.934211000 | 26.880924000 | 30.426942000 |
| O                         | 27.912782000 | 25.849032000 | 25.849031000 | O  | 26.880889000 | 24.934201000 | 30.426937000 |
| O                         | 27.912889000 | 27.912886000 | 25.848919000 | O  | 26.880878000 | 28.827589000 | 30.426943000 |
| O                         | 26.880945000 | 28.827581000 | 23.334856000 | O  | 28.827598000 | 26.880862000 | 30.426940000 |
| O                         | 28.827591000 | 26.880922000 | 23.334870000 | O  | 25.848909000 | 12.408453000 | 12.408455000 |
| O                         | 24.934197000 | 23.334881000 | 26.880846000 | O  | 23.334862000 | 11.493756000 | 13.440411000 |
| O                         | 25.849012000 | 25.849025000 | 27.912771000 | O  | 23.334855000 | 15.387135000 | 13.440484000 |
| O                         | 27.912892000 | 25.848913000 | 27.912887000 | O  | 23.334864000 | 13.440413000 | 11.493754000 |
| O                         | 26.880944000 | 23.334850000 | 28.827576000 | O  | 23.334856000 | 13.440488000 | 15.387138000 |
| O                         | 28.827591000 | 23.334868000 | 26.880917000 | O  | 24.934211000 | 9.894408000  | 13.440426000 |
| O                         | 25.849012000 | 12.408579000 | 14.472325000 | O  | 26.880889000 | 9.894413000  | 15.387149000 |
| O                         | 25.848911000 | 14.472433000 | 14.472432000 | O  | 27.912786000 | 12.408573000 | 12.408574000 |
| O                         | 24.934197000 | 13.440504000 | 16.986469000 | O  | 26.880878000 | 9.894407000  | 11.493761000 |
| O                         | 26.880944000 | 11.493774000 | 16.986500000 | O  | 28.827598000 | 9.894410000  | 13.440488000 |
| O                         | 27.912892000 | 12.408463000 | 14.472437000 | O  | 30.426944000 | 11.493755000 | 13.440484000 |
| O                         | 27.912782000 | 14.472319000 | 14.472318000 | O  | 30.426936000 | 15.387151000 | 13.440421000 |
| O                         | 28.827591000 | 13.440433000 | 16.986482000 | O  | 30.426946000 | 13.440483000 | 11.493756000 |
| O                         | 25.849015000 | 14.472322000 | 12.408582000 | O  | 30.426933000 | 13.440426000 | 15.387152000 |
| O                         | 24.934203000 | 16.986468000 | 13.440501000 | O  | 24.934210000 | 13.440425000 | 9.894409000  |
| O                         | 27.912889000 | 14.472431000 | 12.408464000 | O  | 26.880879000 | 11.493760000 | 9.894408000  |
| O                         | 26.880945000 | 16.986494000 | 11.493769000 | O  | 26.880889000 | 15.387147000 | 9.894411000  |
| O                         | 28.827591000 | 16.986480000 | 13.440428000 | O  | 28.827596000 | 13.440487000 | 9.894406000  |
| C                         | 23.755332000 | 26.686089000 | 23.755213000 | C  | 23.753697000 | 27.066116000 | 30.007949000 |
| Zr                        | 24.236612000 | 26.881475000 | 26.880552000 | C  | 23.753135000 | 30.008630000 | 27.063604000 |
| Zr                        | 26.880671000 | 29.524609000 | 26.880680000 | C  | 26.696398000 | 30.008246000 | 30.008106000 |
| Zr                        | 29.524440000 | 26.882357000 | 26.881381000 | C  | 30.007968000 | 30.008237000 | 26.695581000 |
| C                         | 27.064326000 | 30.008530000 | 23.753165000 | C  | 30.008286000 | 26.697416000 | 30.008420000 |
| C                         | 30.008123000 | 27.066993000 | 23.753823000 | C  | 23.753697000 | 10.313401000 | 13.255234000 |
| C                         | 23.755714000 | 23.756676000 | 26.684338000 | C  | 23.753135000 | 13.257746000 | 10.312720000 |
| Zr                        | 26.880615000 | 26.881402000 | 29.524137000 | C  | 26.696398000 | 10.313244000 | 10.313104000 |
| C                         | 27.065914000 | 23.754135000 | 30.008060000 | C  | 30.008286000 | 10.312930000 | 13.623934000 |
| C                         | 30.007964000 | 23.754748000 | 27.067567000 | C  | 30.007968000 | 13.625768000 | 10.313113000 |
|                           |              |              |              | H  | 27.351814000 | 30.759513000 | 23.002127000 |

| Journal Name |              |              |              | ARTICLE |              |              |              |
|--------------|--------------|--------------|--------------|---------|--------------|--------------|--------------|
| H            | 30.758179000 | 27.358190000 | 23.003211000 | C       | 13.440450000 | 23.727502000 | 16.593848000 |
| H            | 23.008991000 | 23.009158000 | 26.377462000 | O       | 13.440450000 | 23.335040000 | 15.387165000 |
| H            | 27.355985000 | 23.003402000 | 30.758391000 | O       | 13.440450000 | 23.335040000 | 11.493735000 |
| H            | 30.757581000 | 23.004153000 | 27.359935000 | C       | 18.960712000 | 26.559942000 | 17.333342000 |
| H            | 23.008991000 | 13.943888000 | 17.312192000 | C       | 19.936757000 | 26.544889000 | 18.317452000 |
| H            | 27.355985000 | 9.562959000  | 17.317948000 | H       | 19.144577000 | 26.397044000 | 16.322082000 |
| H            | 30.757582000 | 12.961415000 | 17.317197000 | H       | 20.830009000 | 26.284144000 | 18.007515000 |
| H            | 27.351814000 | 17.319223000 | 9.561837000  | C       | 21.360638000 | 17.333342000 | 13.119492000 |
| H            | 30.758179000 | 17.318139000 | 12.963160000 | C       | 20.384593000 | 18.317452000 | 13.104439000 |
| H            | 23.003255000 | 27.356162000 | 30.758555000 | H       | 21.176773000 | 16.322082000 | 12.956594000 |
| H            | 23.001913000 | 30.759916000 | 27.349810000 | H       | 19.491341000 | 18.007515000 | 12.843694000 |
| H            | 26.407446000 | 30.758917000 | 30.758911000 | C       | 22.988008000 | 18.960712000 | 13.761408000 |
| H            | 30.758582000 | 30.758568000 | 26.405278000 | C       | 22.003898000 | 19.936757000 | 13.776461000 |
| H            | 30.759373000 | 26.409850000 | 30.759355000 | H       | 23.999268000 | 19.144577000 | 13.924306000 |
| H            | 23.003255000 | 9.562795000  | 12.965188000 | H       | 22.313835000 | 20.830009000 | 14.037206000 |
| H            | 23.001913000 | 12.971540000 | 9.561434000  | Zr      | 10.956924000 | 26.880900000 | 13.440450000 |
| H            | 26.407446000 | 9.562439000  | 9.562434000  | O       | 9.894590000  | 26.880900000 | 11.493735000 |
| H            | 30.759373000 | 9.561995000  | 13.911500000 | O       | 12.408223000 | 27.913127000 | 14.472677000 |
| H            | 30.758582000 | 13.916071000 | 9.562782000  | C       | 10.287052000 | 26.880900000 | 10.287052000 |
| H            | 25.215026000 | 11.776433000 | 15.102845000 | Zr      | 15.923976000 | 26.880900000 | 13.440450000 |
| H            | 28.544134000 | 11.776251000 | 11.775822000 | O       | 16.986310000 | 26.880900000 | 11.493735000 |
| H            | 28.555271000 | 15.099035000 | 15.098322000 | C       | 16.593848000 | 26.880900000 | 10.287052000 |
| H            | 25.215244000 | 15.103495000 | 11.776660000 | O       | 16.986310000 | 26.880900000 | 15.387165000 |
| H            | 25.215244000 | 28.544690000 | 25.217855000 | O       | 14.472677000 | 27.913127000 | 12.408223000 |
| H            | 28.555271000 | 25.223028000 | 25.222315000 | C       | 16.593848000 | 26.880900000 | 16.593848000 |
| H            | 28.544134000 | 28.545528000 | 28.545099000 | C       | 17.650268000 | 26.880900000 | 17.650268000 |
| H            | 25.215026000 | 25.218505000 | 28.544917000 | C       | 19.634347000 | 26.880900000 | 19.634347000 |
| O            | 14.472677000 | 25.848673000 | 14.472677000 | O       | 9.894590000  | 26.880900000 | 15.387165000 |
| O            | 12.408223000 | 25.848673000 | 12.408223000 | C       | 10.287052000 | 26.880900000 | 16.593848000 |
| O            | 14.472677000 | 25.848673000 | 12.408223000 | Zr      | 13.440450000 | 26.880900000 | 15.923976000 |
| O            | 12.408223000 | 25.848673000 | 14.472677000 | O       | 11.493735000 | 26.880900000 | 16.986310000 |
| Zr           | 13.440450000 | 24.397374000 | 13.440450000 | O       | 14.472677000 | 27.913127000 | 14.472677000 |
| O            | 11.493735000 | 23.335040000 | 13.440450000 | Zr      | 13.440450000 | 26.880900000 | 10.956924000 |
| C            | 10.287052000 | 23.727502000 | 13.440450000 | O       | 11.493735000 | 26.880900000 | 9.894590000  |
| O            | 15.387165000 | 23.335040000 | 13.440450000 | O       | 15.387165000 | 26.880900000 | 9.894590000  |
| C            | 16.593848000 | 23.727502000 | 13.440450000 | O       | 12.408223000 | 27.913127000 | 12.408223000 |
| C            | 17.650268000 | 22.671082000 | 13.440450000 | O       | 15.387165000 | 26.880900000 | 16.986310000 |
| C            | 19.634347000 | 20.687003000 | 13.440450000 | Zr      | 13.440450000 | 29.364426000 | 13.440450000 |
| C            | 18.960712000 | 22.988008000 | 13.761408000 | O       | 11.493735000 | 30.426760000 | 13.440450000 |
| C            | 19.936757000 | 22.003898000 | 13.776461000 | C       | 10.287052000 | 30.034298000 | 13.440450000 |
| H            | 19.144577000 | 23.999268000 | 13.924306000 | O       | 15.387165000 | 30.426760000 | 13.440450000 |
| H            | 20.830009000 | 22.313835000 | 14.037206000 | C       | 16.593848000 | 30.034298000 | 13.440450000 |
| O            | 9.894590000  | 24.934185000 | 13.440450000 | O       | 16.986310000 | 28.827615000 | 13.440450000 |
| O            | 16.986310000 | 24.934185000 | 13.440450000 | O       | 9.894590000  | 28.827615000 | 13.440450000 |
| C            | 17.333342000 | 21.360638000 | 13.119492000 | C       | 22.671082000 | 26.880900000 | 22.671082000 |
| C            | 18.317452000 | 20.384593000 | 13.104439000 | C       | 20.687003000 | 26.880900000 | 20.687003000 |
| H            | 16.322082000 | 21.176773000 | 12.956594000 | C       | 21.360638000 | 27.201858000 | 22.988008000 |
| H            | 18.007515000 | 19.491341000 | 12.843694000 | C       | 20.384593000 | 27.216911000 | 22.003898000 |
| C            | 22.988008000 | 26.559942000 | 21.360638000 | H       | 21.176773000 | 27.364756000 | 23.999268000 |
| C            | 22.003898000 | 26.544889000 | 20.384593000 | H       | 19.491341000 | 27.477656000 | 22.313835000 |
| H            | 23.999268000 | 26.397044000 | 21.176773000 | O       | 13.440450000 | 28.827615000 | 16.986310000 |
| H            | 22.313835000 | 26.284144000 | 19.491341000 | C       | 13.440450000 | 30.034298000 | 16.593848000 |
| C            | 22.671082000 | 17.650268000 | 13.440450000 | O       | 13.440450000 | 28.827615000 | 9.894590000  |
| C            | 20.687003000 | 19.634347000 | 13.440450000 | C       | 13.440450000 | 30.034298000 | 10.287052000 |
| O            | 13.440450000 | 24.934185000 | 9.894590000  | O       | 13.440450000 | 30.426760000 | 15.387165000 |
| C            | 13.440450000 | 23.727502000 | 10.287052000 | O       | 13.440450000 | 30.426760000 | 11.493735000 |
| O            | 13.440450000 | 24.934185000 | 16.986310000 | C       | 17.333342000 | 27.201858000 | 18.960712000 |

## ARTICLE

## Journal Name

|    |              |              |              |               |              |              |              |
|----|--------------|--------------|--------------|---------------|--------------|--------------|--------------|
| C  | 18.317452000 | 27.216911000 | 19.936757000 | H             | 24.659700000 | 23.738914000 | 13.956016000 |
| H  | 16.322082000 | 27.364756000 | 19.144577000 | H             | 24.284721000 | 21.988815000 | 12.898311000 |
| H  | 18.007515000 | 27.477656000 | 20.830009000 | H             | 25.012793000 | 20.514605000 | 12.291113000 |
| H  | 13.440450000 | 30.790903000 | 9.530447000  | C             | 26.046840000 | 27.666202000 | 15.085129000 |
| H  | 17.350453000 | 26.880900000 | 9.530447000  | O             | 25.609402000 | 27.796295000 | 16.161824000 |
| H  | 17.350453000 | 30.790903000 | 13.440450000 | O             | 26.440043000 | 27.586992000 | 13.986105000 |
| H  | 13.440450000 | 30.790903000 | 17.350453000 | <b>e. TS1</b> |              |              |              |
| H  | 9.530447000  | 30.790903000 | 13.440450000 | N             | 26.541802000 | 21.872171000 | 20.392432000 |
| H  | 9.530447000  | 26.880900000 | 17.350453000 | N             | 26.779211000 | 19.926658000 | 18.443875000 |
| H  | 13.440450000 | 22.970897000 | 9.530447000  | C             | 26.645586000 | 20.586867000 | 20.789699000 |
| H  | 9.530447000  | 22.970897000 | 13.440450000 | C             | 26.584125000 | 22.850101000 | 21.307787000 |
| H  | 13.440450000 | 22.970897000 | 17.350453000 | C             | 26.792977000 | 18.999427000 | 17.467977000 |
| H  | 15.026933000 | 25.294417000 | 11.853967000 | C             | 26.634955000 | 19.534349000 | 19.732705000 |
| H  | 11.853967000 | 28.467383000 | 11.853967000 | C             | 26.777368000 | 20.273471000 | 22.151392000 |
| H  | 9.530447000  | 26.880900000 | 9.530447000  | C             | 26.711304000 | 22.631477000 | 22.691683000 |
| H  | 15.026933000 | 28.467383000 | 15.026933000 | C             | 26.700022000 | 17.621883000 | 17.689111000 |
| H  | 11.853967000 | 25.294417000 | 15.026933000 | C             | 26.482213000 | 18.171374000 | 20.031817000 |
| H  | 26.451947000 | 23.864015000 | 20.926150000 | C             | 26.800528000 | 21.291910000 | 23.094165000 |
| H  | 26.774890000 | 19.383322000 | 16.442911000 | C             | 26.528452000 | 17.221457000 | 19.022830000 |
| H  | 26.950734000 | 19.249823000 | 22.466925000 | C             | 26.809925000 | 23.730886000 | 23.728973000 |
| H  | 26.384470000 | 17.850399000 | 21.062897000 | C             | 26.809925000 | 16.592377000 | 16.590464000 |
| H  | 26.969039000 | 21.069162000 | 24.142361000 | O             | 26.880885000 | 24.934153000 | 23.334955000 |
| H  | 26.508962000 | 16.160445000 | 19.257417000 | O             | 26.880903000 | 23.334945000 | 24.934136000 |
| Cu | 26.593042000 | 21.925664000 | 17.934374000 | O             | 26.880903000 | 15.387214000 | 16.986405000 |
| I  | 24.319263000 | 21.747494000 | 16.663210000 | O             | 26.880885000 | 16.986395000 | 15.387197000 |
| C  | 27.401642000 | 23.700340000 | 17.448005000 | Zr            | 26.878142000 | 26.881612000 | 24.237883000 |
| C  | 28.297788000 | 22.960691000 | 17.906361000 | Zr            | 26.878209000 | 24.239690000 | 26.880717000 |
| H  | 29.256647000 | 22.632310000 | 18.256487000 | Zr            | 26.878209000 | 13.440633000 | 16.081660000 |
| C  | 26.697387000 | 24.826773000 | 16.797244000 | Zr            | 26.878142000 | 16.083467000 | 13.439738000 |
| H  | 26.337188000 | 25.510099000 | 17.576102000 | O             | 24.934203000 | 26.880849000 | 23.334882000 |
| H  | 25.801775000 | 24.430063000 | 16.290660000 | O             | 25.848911000 | 25.848918000 | 25.848917000 |
| O  | 27.535710000 | 25.548615000 | 15.936696000 | O             | 25.849015000 | 27.912768000 | 25.849028000 |
| H  | 27.753464000 | 24.906005000 | 15.207775000 | O             | 27.912782000 | 25.849032000 | 25.849031000 |
| C  | 25.842096000 | 23.599730000 | 10.945332000 | O             | 27.912889000 | 27.912886000 | 25.848919000 |
| C  | 25.278405000 | 24.538191000 | 12.007694000 | O             | 26.880945000 | 28.827581000 | 23.334856000 |
| C  | 25.567506000 | 24.115335000 | 13.467462000 | O             | 28.827591000 | 26.880922000 | 23.334870000 |
| C  | 25.237094000 | 22.199823000 | 10.957498000 | O             | 24.934197000 | 23.334881000 | 26.880846000 |
| C  | 26.640725000 | 23.073049000 | 13.635413000 | O             | 25.849012000 | 25.849025000 | 27.912771000 |
| C  | 25.156498000 | 21.595779000 | 12.359726000 | O             | 27.912892000 | 25.848913000 | 27.912887000 |
| N  | 26.357059000 | 21.824364000 | 13.149032000 | O             | 26.880944000 | 23.334850000 | 28.827576000 |
| H  | 25.707078000 | 24.044987000 | 9.953413000  | O             | 28.827591000 | 23.334868000 | 26.880917000 |
| H  | 25.828898000 | 21.545192000 | 10.305025000 | O             | 25.849012000 | 12.408579000 | 14.472325000 |
| C  | 28.752603000 | 22.379360000 | 14.379717000 | O             | 25.848911000 | 14.472433000 | 14.472432000 |
| N  | 27.749613000 | 23.416656000 | 14.219334000 | O             | 24.934197000 | 13.440504000 | 16.986469000 |
| C  | 28.114129000 | 21.025109000 | 14.634655000 | O             | 26.880944000 | 11.493774000 | 16.986500000 |
| C  | 27.186567000 | 20.676077000 | 13.489925000 | O             | 27.912892000 | 12.408463000 | 14.472437000 |
| H  | 26.521246000 | 19.846732000 | 13.770236000 | O             | 27.912782000 | 14.472319000 | 14.472318000 |
| H  | 29.407023000 | 22.661642000 | 15.213199000 | O             | 28.827591000 | 13.440433000 | 16.986482000 |
| H  | 26.927784000 | 23.521019000 | 11.090184000 | O             | 25.849015000 | 14.472322000 | 12.408582000 |
| H  | 24.222817000 | 22.219468000 | 10.537945000 | O             | 24.934203000 | 16.986468000 | 13.440501000 |
| H  | 27.757498000 | 20.340381000 | 12.608924000 | O             | 27.912889000 | 14.472431000 | 12.408464000 |
| H  | 29.391051000 | 22.334682000 | 13.481889000 | O             | 26.880945000 | 16.986494000 | 11.493769000 |
| H  | 24.195227000 | 24.644280000 | 11.867856000 | O             | 28.827591000 | 16.986480000 | 13.440428000 |
| H  | 25.701810000 | 25.534591000 | 11.845368000 | C             | 23.755332000 | 26.686089000 | 23.755213000 |
| H  | 28.853826000 | 20.228954000 | 14.773718000 | Zr            | 24.236612000 | 26.881475000 | 26.880552000 |
| H  | 27.527190000 | 21.109535000 | 15.560988000 | Zr            | 26.880671000 | 29.524609000 | 26.880680000 |
| H  | 25.893755000 | 24.983441000 | 14.043691000 | Zr            | 29.524440000 | 26.882357000 | 26.881381000 |



| Journal Name |              |              |              | ARTICLE |              |              |              |
|--------------|--------------|--------------|--------------|---------|--------------|--------------|--------------|
| C            | 27.064326000 | 30.008530000 | 23.753165000 | C       | 23.753697000 | 10.313401000 | 13.255234000 |
| C            | 30.008123000 | 27.066993000 | 23.753823000 | C       | 23.753135000 | 13.257746000 | 10.312720000 |
| C            | 23.755714000 | 23.756676000 | 26.684338000 | C       | 26.696398000 | 10.313244000 | 10.313104000 |
| Zr           | 26.880615000 | 26.881402000 | 29.524137000 | C       | 30.008286000 | 10.312930000 | 13.623934000 |
| C            | 27.065914000 | 23.754135000 | 30.008060000 | C       | 30.007968000 | 13.625768000 | 10.313113000 |
| C            | 30.007964000 | 23.754748000 | 27.067567000 | H       | 27.351814000 | 30.759513000 | 23.002127000 |
| Zr           | 24.236612000 | 13.440798000 | 13.439875000 | H       | 30.758179000 | 27.358190000 | 23.003211000 |
| Zr           | 26.880615000 | 10.797213000 | 13.439948000 | H       | 23.008991000 | 23.009158000 | 26.377462000 |
| C            | 23.755714000 | 13.637012000 | 16.564674000 | H       | 27.355985000 | 23.003402000 | 30.758391000 |
| C            | 27.065914000 | 10.313290000 | 16.567215000 | H       | 30.757581000 | 23.004153000 | 27.359935000 |
| Zr           | 29.524440000 | 13.439969000 | 13.438993000 | H       | 23.008991000 | 13.943888000 | 17.312192000 |
| C            | 30.007964000 | 13.253783000 | 16.566602000 | H       | 27.355985000 | 9.562959000  | 17.317948000 |
| Zr           | 26.880671000 | 13.440670000 | 10.796741000 | H       | 30.757582000 | 12.961415000 | 17.317197000 |
| C            | 23.755332000 | 16.566137000 | 13.635261000 | H       | 27.351814000 | 17.319223000 | 9.561837000  |
| C            | 27.064326000 | 16.568185000 | 10.312820000 | H       | 30.758179000 | 17.318139000 | 12.963160000 |
| C            | 30.008123000 | 16.567527000 | 13.254357000 | H       | 23.003255000 | 27.356162000 | 30.758555000 |
| O            | 23.334855000 | 26.880866000 | 24.934215000 | H       | 23.001913000 | 30.759916000 | 27.349810000 |
| O            | 23.334856000 | 24.934212000 | 26.880862000 | H       | 26.407446000 | 30.758917000 | 30.758911000 |
| O            | 25.848909000 | 27.912895000 | 27.912897000 | H       | 30.758582000 | 30.758568000 | 26.405278000 |
| O            | 23.334862000 | 26.880939000 | 28.827594000 | H       | 30.759373000 | 26.409850000 | 30.759355000 |
| O            | 23.334864000 | 28.827596000 | 26.880937000 | H       | 23.003255000 | 9.562795000  | 12.965188000 |
| O            | 24.934210000 | 30.426941000 | 26.880925000 | H       | 23.001913000 | 12.971540000 | 9.561434000  |
| O            | 26.880889000 | 30.426939000 | 24.934203000 | H       | 26.407446000 | 9.562439000  | 9.562434000  |
| O            | 26.880879000 | 30.426942000 | 28.827590000 | H       | 30.759373000 | 9.561995000  | 13.911500000 |
| O            | 27.912786000 | 27.912776000 | 27.912777000 | H       | 30.758582000 | 13.916071000 | 9.562782000  |
| O            | 28.827596000 | 30.426944000 | 26.880863000 | H       | 25.215026000 | 11.776433000 | 15.102845000 |
| O            | 30.426933000 | 24.934198000 | 26.880924000 | H       | 28.544134000 | 11.776251000 | 11.775822000 |
| O            | 30.426936000 | 26.880929000 | 24.934199000 | H       | 28.555271000 | 15.099035000 | 15.098322000 |
| O            | 30.426944000 | 26.880866000 | 28.827595000 | H       | 25.215244000 | 15.103495000 | 11.776660000 |
| O            | 30.426946000 | 28.827594000 | 26.880867000 | H       | 25.215244000 | 28.544690000 | 25.217855000 |
| O            | 24.934211000 | 26.880924000 | 30.426942000 | H       | 28.555271000 | 25.223028000 | 25.222315000 |
| O            | 26.880889000 | 24.934201000 | 30.426937000 | H       | 28.544134000 | 28.545528000 | 28.545099000 |
| O            | 26.880878000 | 28.827589000 | 30.426943000 | H       | 25.215026000 | 25.218505000 | 28.544917000 |
| O            | 28.827598000 | 26.880862000 | 30.426940000 | O       | 14.472677000 | 25.848673000 | 14.472677000 |
| O            | 25.848909000 | 12.408453000 | 12.408455000 | O       | 12.408223000 | 25.848673000 | 12.408223000 |
| O            | 23.334862000 | 11.493756000 | 13.440411000 | O       | 14.472677000 | 25.848673000 | 12.408223000 |
| O            | 23.334855000 | 15.387135000 | 13.440484000 | O       | 12.408223000 | 25.848673000 | 14.472677000 |
| O            | 23.334864000 | 13.440413000 | 11.493754000 | Zr      | 13.440450000 | 24.397374000 | 13.440450000 |
| O            | 23.334856000 | 13.440488000 | 15.387138000 | O       | 11.493735000 | 23.335040000 | 13.440450000 |
| O            | 24.934211000 | 9.894408000  | 13.440426000 | C       | 10.287052000 | 23.727502000 | 13.440450000 |
| O            | 26.880889000 | 9.894413000  | 15.387149000 | O       | 15.387165000 | 23.335040000 | 13.440450000 |
| O            | 27.912786000 | 12.408573000 | 12.408574000 | C       | 16.593848000 | 23.727502000 | 13.440450000 |
| O            | 26.880878000 | 9.894407000  | 11.493761000 | C       | 17.650268000 | 22.671082000 | 13.440450000 |
| O            | 28.827598000 | 9.894410000  | 13.440488000 | C       | 19.634347000 | 20.687003000 | 13.440450000 |
| O            | 30.426944000 | 11.493755000 | 13.440484000 | C       | 18.960712000 | 22.988008000 | 13.761408000 |
| O            | 30.426936000 | 15.387151000 | 13.440421000 | C       | 19.936757000 | 22.003898000 | 13.776461000 |
| O            | 30.426946000 | 13.440483000 | 11.493756000 | H       | 19.144577000 | 23.999268000 | 13.924306000 |
| O            | 30.426933000 | 13.440426000 | 15.387152000 | H       | 20.830009000 | 22.313835000 | 14.037206000 |
| O            | 24.934210000 | 13.440425000 | 9.894409000  | O       | 9.894590000  | 24.934185000 | 13.440450000 |
| O            | 26.880879000 | 11.493760000 | 9.894408000  | O       | 16.986310000 | 24.934185000 | 13.440450000 |
| O            | 26.880889000 | 15.387147000 | 9.894411000  | C       | 17.333342000 | 21.360638000 | 13.119492000 |
| O            | 28.827596000 | 13.440487000 | 9.894406000  | C       | 18.317452000 | 20.384593000 | 13.104439000 |
| C            | 23.753697000 | 27.066116000 | 30.007949000 | H       | 16.322082000 | 21.176773000 | 12.956594000 |
| C            | 23.753135000 | 30.008630000 | 27.063604000 | H       | 18.007515000 | 19.491341000 | 12.843694000 |
| C            | 26.696398000 | 30.008246000 | 30.008106000 | C       | 22.988008000 | 26.559942000 | 21.360638000 |
| C            | 30.007968000 | 30.008237000 | 26.695581000 | C       | 22.003898000 | 26.544889000 | 20.384593000 |
| C            | 30.008286000 | 26.697416000 | 30.008420000 | H       | 23.999268000 | 26.397044000 | 21.176773000 |

## ARTICLE

## Journal Name

|    |              |              |              |    |              |              |              |
|----|--------------|--------------|--------------|----|--------------|--------------|--------------|
| H  | 22.313835000 | 26.284144000 | 19.491341000 | C  | 13.440450000 | 30.034298000 | 16.593848000 |
| C  | 22.671082000 | 17.650268000 | 13.440450000 | O  | 13.440450000 | 28.827615000 | 9.894590000  |
| C  | 20.687003000 | 19.634347000 | 13.440450000 | C  | 13.440450000 | 30.034298000 | 10.287052000 |
| O  | 13.440450000 | 24.934185000 | 9.894590000  | O  | 13.440450000 | 30.426760000 | 15.387165000 |
| C  | 13.440450000 | 23.727502000 | 10.287052000 | O  | 13.440450000 | 30.426760000 | 11.493735000 |
| O  | 13.440450000 | 24.934185000 | 16.986310000 | C  | 17.333342000 | 27.201858000 | 18.960712000 |
| C  | 13.440450000 | 23.727502000 | 16.593848000 | C  | 18.317452000 | 27.216911000 | 19.936757000 |
| O  | 13.440450000 | 23.335040000 | 15.387165000 | H  | 16.322082000 | 27.364756000 | 19.144577000 |
| O  | 13.440450000 | 23.335040000 | 11.493735000 | H  | 18.007515000 | 27.477656000 | 20.830009000 |
| C  | 18.960712000 | 26.559942000 | 17.333342000 | H  | 13.440450000 | 30.790903000 | 9.530447000  |
| C  | 19.936757000 | 26.544889000 | 18.317452000 | H  | 17.350453000 | 26.880900000 | 9.530447000  |
| H  | 19.144577000 | 26.397044000 | 16.322082000 | H  | 17.350453000 | 30.790903000 | 13.440450000 |
| H  | 20.830009000 | 26.284144000 | 18.007515000 | H  | 13.440450000 | 30.790903000 | 17.350453000 |
| C  | 21.360638000 | 17.333342000 | 13.119492000 | H  | 9.530447000  | 30.790903000 | 13.440450000 |
| C  | 20.384593000 | 18.317452000 | 13.104439000 | H  | 9.530447000  | 26.880900000 | 17.350453000 |
| H  | 21.176773000 | 16.322082000 | 12.956594000 | H  | 13.440450000 | 22.970897000 | 9.530447000  |
| H  | 19.491341000 | 18.007515000 | 12.843694000 | H  | 9.530447000  | 22.970897000 | 13.440450000 |
| C  | 22.988008000 | 18.960712000 | 13.761408000 | H  | 13.440450000 | 22.970897000 | 17.350453000 |
| C  | 22.003898000 | 19.936757000 | 13.776461000 | H  | 15.026933000 | 25.294417000 | 11.853967000 |
| H  | 23.999268000 | 19.144577000 | 13.924306000 | H  | 11.853967000 | 28.467383000 | 11.853967000 |
| H  | 22.313835000 | 20.830009000 | 14.037206000 | H  | 9.530447000  | 26.880900000 | 9.530447000  |
| Zr | 10.956924000 | 26.880900000 | 13.440450000 | H  | 15.026933000 | 28.467383000 | 15.026933000 |
| O  | 9.894590000  | 26.880900000 | 11.493735000 | H  | 11.853967000 | 25.294417000 | 15.026933000 |
| O  | 12.408223000 | 27.913127000 | 14.472677000 | H  | 26.512695000 | 23.864718000 | 20.918629000 |
| C  | 10.287052000 | 26.880900000 | 10.287052000 | H  | 26.884105000 | 19.384736000 | 16.454877000 |
| Zr | 15.923976000 | 26.880900000 | 13.440450000 | H  | 26.886256000 | 19.244211000 | 22.478211000 |
| O  | 16.986310000 | 26.880900000 | 11.493735000 | H  | 26.315402000 | 17.852667000 | 21.055289000 |
| C  | 16.593848000 | 26.880900000 | 10.287052000 | H  | 26.908119000 | 21.066697000 | 24.150475000 |
| O  | 16.986310000 | 26.880900000 | 15.387165000 | H  | 26.429630000 | 16.164601000 | 19.249060000 |
| O  | 14.472677000 | 27.913127000 | 12.408223000 | Cu | 26.495015000 | 21.924644000 | 17.943102000 |
| C  | 16.593848000 | 26.880900000 | 16.593848000 | I  | 24.053834000 | 21.551584000 | 17.078834000 |
| C  | 17.650268000 | 26.880900000 | 17.650268000 | C  | 27.149856000 | 23.751245000 | 17.320135000 |
| C  | 19.634347000 | 26.880900000 | 19.634347000 | C  | 28.113697000 | 23.060891000 | 17.715447000 |
| O  | 9.894590000  | 26.880900000 | 15.387165000 | H  | 29.119114000 | 22.805203000 | 17.987840000 |
| C  | 10.287052000 | 26.880900000 | 16.593848000 | C  | 26.314912000 | 24.792898000 | 16.655589000 |
| Zr | 13.440450000 | 26.880900000 | 15.923976000 | H  | 26.804069000 | 25.751883000 | 16.918275000 |
| O  | 11.493735000 | 26.880900000 | 16.986310000 | H  | 25.317311000 | 24.798682000 | 17.129298000 |
| O  | 14.472677000 | 27.913127000 | 14.472677000 | O  | 26.246040000 | 24.624509000 | 15.297154000 |
| Zr | 13.440450000 | 26.880900000 | 10.956924000 | H  | 26.298989000 | 23.233621000 | 14.764378000 |
| O  | 11.493735000 | 26.880900000 | 9.894590000  | C  | 25.396282000 | 23.567386000 | 10.850567000 |
| O  | 15.387165000 | 26.880900000 | 9.894590000  | C  | 24.564918000 | 24.209584000 | 11.959361000 |
| O  | 12.408223000 | 27.913127000 | 12.408223000 | C  | 24.335810000 | 23.320975000 | 13.205546000 |
| O  | 15.387165000 | 26.880900000 | 16.986310000 | C  | 24.808630000 | 22.298225000 | 10.236058000 |
| Zr | 13.440450000 | 29.364426000 | 13.440450000 | C  | 25.341095000 | 22.218100000 | 13.291468000 |
| O  | 11.493735000 | 30.426760000 | 13.440450000 | C  | 24.346724000 | 21.285764000 | 11.287056000 |
| C  | 10.287052000 | 30.034298000 | 13.440450000 | N  | 25.259208000 | 21.188112000 | 12.423039000 |
| O  | 15.387165000 | 30.426760000 | 13.440450000 | H  | 25.565873000 | 24.302314000 | 10.057163000 |
| C  | 16.593848000 | 30.034298000 | 13.440450000 | H  | 25.555777000 | 21.838991000 | 9.576786000  |
| O  | 16.986310000 | 28.827615000 | 13.440450000 | C  | 27.365655000 | 21.353929000 | 14.317669000 |
| O  | 9.894590000  | 28.827615000 | 13.440450000 | N  | 26.294013000 | 22.315970000 | 14.177996000 |
| C  | 22.671082000 | 26.880900000 | 22.671082000 | C  | 26.966681000 | 20.017660000 | 13.720023000 |
| C  | 20.687003000 | 26.880900000 | 20.687003000 | C  | 26.348260000 | 20.217440000 | 12.349302000 |
| C  | 21.360638000 | 27.201858000 | 22.988008000 | H  | 25.942637000 | 19.277342000 | 11.966593000 |
| C  | 20.384593000 | 27.216911000 | 22.003898000 | H  | 27.587300000 | 21.265725000 | 15.390348000 |
| H  | 21.176773000 | 27.364756000 | 23.999268000 | H  | 26.393870000 | 23.349574000 | 11.255623000 |
| H  | 19.491341000 | 27.477656000 | 22.313835000 | H  | 23.948123000 | 22.539638000 | 9.599793000  |
| O  | 13.440450000 | 28.827615000 | 16.986310000 | H  | 27.106682000 | 20.564876000 | 11.628412000 |

| Journal Name  |              |              |              | ARTICLE |              |              |              |
|---------------|--------------|--------------|--------------|---------|--------------|--------------|--------------|
| H             | 28.268426000 | 21.760559000 | 13.839632000 | O       | 26.880945000 | 16.986494000 | 11.493769000 |
| H             | 23.593288000 | 24.533101000 | 11.567227000 | O       | 28.827591000 | 16.986480000 | 13.440428000 |
| H             | 25.092674000 | 25.109056000 | 12.288053000 | C       | 23.755332000 | 26.686089000 | 23.755213000 |
| H             | 27.829060000 | 19.348644000 | 13.644887000 | Zr      | 24.236612000 | 26.881475000 | 26.880552000 |
| H             | 26.236621000 | 19.530015000 | 14.375245000 | Zr      | 26.880671000 | 29.524609000 | 26.880680000 |
| H             | 24.426952000 | 23.917047000 | 14.116461000 | Zr      | 29.524440000 | 26.882357000 | 26.881381000 |
| H             | 23.334813000 | 22.880709000 | 13.203940000 | C       | 27.064326000 | 30.008530000 | 23.753165000 |
| H             | 23.355681000 | 21.555928000 | 11.662317000 | C       | 30.008123000 | 27.066993000 | 23.753823000 |
| H             | 24.251656000 | 20.280768000 | 10.864714000 | C       | 23.755714000 | 23.756676000 | 26.684338000 |
| C             | 27.853939000 | 25.345836000 | 14.310251000 | Zr      | 26.880615000 | 26.881402000 | 29.524137000 |
| O             | 28.431906000 | 25.985536000 | 15.127064000 | C       | 27.065914000 | 23.754135000 | 30.008060000 |
| O             | 27.673667000 | 24.871928000 | 13.231425000 | C       | 30.007964000 | 23.754748000 | 27.067567000 |
| <b>f. IM1</b> |              |              |              | Zr      | 24.236612000 | 13.440798000 | 13.439875000 |
| N             | 26.604122000 | 21.873207000 | 20.387501000 | Zr      | 26.880615000 | 10.797213000 | 13.439948000 |
| N             | 26.762945000 | 19.916655000 | 18.451256000 | C       | 23.755714000 | 13.637012000 | 16.564674000 |
| C             | 26.648153000 | 20.586669000 | 20.793301000 | C       | 27.065914000 | 10.313290000 | 16.567215000 |
| C             | 26.645219000 | 22.850550000 | 21.303854000 | Zr      | 29.524440000 | 13.439969000 | 13.438993000 |
| C             | 26.748598000 | 18.995859000 | 17.471325000 | C       | 30.007964000 | 13.253783000 | 16.566602000 |
| C             | 26.631537000 | 19.528196000 | 19.740462000 | Zr      | 26.880671000 | 13.440670000 | 10.796741000 |
| C             | 26.721216000 | 20.272604000 | 22.159025000 | C       | 23.755332000 | 16.566137000 | 13.635261000 |
| C             | 26.713274000 | 22.631336000 | 22.692037000 | C       | 27.064326000 | 16.568185000 | 10.312820000 |
| C             | 26.687406000 | 17.616984000 | 17.692704000 | C       | 30.008123000 | 16.567527000 | 13.254357000 |
| C             | 26.491954000 | 18.163289000 | 20.039569000 | O       | 23.334855000 | 26.880866000 | 24.934215000 |
| C             | 26.746428000 | 21.291976000 | 23.100719000 | O       | 23.334856000 | 24.934212000 | 26.880862000 |
| C             | 26.547625000 | 17.214099000 | 19.029022000 | O       | 25.848909000 | 27.912895000 | 27.912897000 |
| C             | 26.809925000 | 23.730886000 | 23.728973000 | O       | 23.334862000 | 26.880939000 | 28.827594000 |
| C             | 26.809925000 | 16.592377000 | 16.590464000 | O       | 23.334864000 | 28.827596000 | 26.880937000 |
| O             | 26.880885000 | 24.934153000 | 23.334955000 | O       | 24.934210000 | 30.426941000 | 26.880925000 |
| O             | 26.880903000 | 23.334945000 | 24.934136000 | O       | 26.880889000 | 30.426939000 | 24.934203000 |
| O             | 26.880903000 | 15.387214000 | 16.986405000 | O       | 26.880879000 | 30.426942000 | 28.827590000 |
| O             | 26.880885000 | 16.986395000 | 15.387197000 | O       | 27.912786000 | 27.912776000 | 27.912777000 |
| Zr            | 26.878142000 | 26.881612000 | 24.237883000 | O       | 28.827596000 | 30.426944000 | 26.880863000 |
| Zr            | 26.878209000 | 24.239690000 | 26.880717000 | O       | 30.426933000 | 24.934198000 | 26.880924000 |
| Zr            | 26.878209000 | 13.440633000 | 16.081660000 | O       | 30.426936000 | 26.880929000 | 24.934199000 |
| Zr            | 26.878142000 | 16.083467000 | 13.439738000 | O       | 30.426944000 | 26.880866000 | 28.827595000 |
| O             | 24.934203000 | 26.880849000 | 23.334882000 | O       | 30.426946000 | 28.827594000 | 26.880867000 |
| O             | 25.848911000 | 25.848918000 | 25.848917000 | O       | 24.934211000 | 26.880924000 | 30.426942000 |
| O             | 25.849015000 | 27.912768000 | 25.849028000 | O       | 26.880889000 | 24.934201000 | 30.426937000 |
| O             | 27.912782000 | 25.849032000 | 25.849031000 | O       | 26.880878000 | 28.827589000 | 30.426943000 |
| O             | 27.912889000 | 27.912886000 | 25.848919000 | O       | 28.827598000 | 26.880862000 | 30.426940000 |
| O             | 26.880945000 | 28.827581000 | 23.334856000 | O       | 25.848909000 | 12.408453000 | 12.408455000 |
| O             | 28.827591000 | 26.880922000 | 23.334870000 | O       | 23.334862000 | 11.493756000 | 13.440411000 |
| O             | 24.934197000 | 23.334881000 | 26.880846000 | O       | 23.334855000 | 15.387135000 | 13.440484000 |
| O             | 25.849012000 | 25.849025000 | 27.912771000 | O       | 23.334864000 | 13.440413000 | 11.493754000 |
| O             | 27.912892000 | 25.848913000 | 27.912887000 | O       | 23.334856000 | 13.440488000 | 15.387138000 |
| O             | 26.880944000 | 23.334850000 | 28.827576000 | O       | 24.934211000 | 9.894408000  | 13.440426000 |
| O             | 28.827591000 | 23.334868000 | 26.880917000 | O       | 26.880889000 | 9.894413000  | 15.387149000 |
| O             | 25.849012000 | 12.408579000 | 14.472325000 | O       | 27.912786000 | 12.408573000 | 12.408574000 |
| O             | 25.848911000 | 14.472433000 | 14.472432000 | O       | 26.880878000 | 9.894407000  | 11.493761000 |
| O             | 24.934197000 | 13.440504000 | 16.986469000 | O       | 28.827598000 | 9.894410000  | 13.440488000 |
| O             | 26.880944000 | 11.493774000 | 16.986500000 | O       | 30.426944000 | 11.493755000 | 13.440484000 |
| O             | 27.912892000 | 12.408463000 | 14.472437000 | O       | 30.426936000 | 15.387151000 | 13.440421000 |
| O             | 27.912782000 | 14.472319000 | 14.472318000 | O       | 30.426946000 | 13.440483000 | 11.493756000 |
| O             | 28.827591000 | 13.440433000 | 16.986482000 | O       | 30.426933000 | 13.440426000 | 15.387152000 |
| O             | 25.849015000 | 14.472322000 | 12.408582000 | O       | 24.934210000 | 13.440425000 | 9.894409000  |
| O             | 24.934203000 | 16.986468000 | 13.440501000 | O       | 26.880879000 | 11.493760000 | 9.894408000  |
| O             | 27.912889000 | 14.472431000 | 12.408464000 | O       | 26.880889000 | 15.387147000 | 9.894411000  |

## ARTICLE

## Journal Name

|    |              |              |              |    |              |              |              |
|----|--------------|--------------|--------------|----|--------------|--------------|--------------|
| O  | 28.827596000 | 13.440487000 | 9.894406000  | C  | 18.317452000 | 20.384593000 | 13.104439000 |
| C  | 23.753697000 | 27.066116000 | 30.007949000 | H  | 16.322082000 | 21.176773000 | 12.956594000 |
| C  | 23.753135000 | 30.008630000 | 27.063604000 | H  | 18.007515000 | 19.491341000 | 12.843694000 |
| C  | 26.696398000 | 30.008246000 | 30.008106000 | C  | 22.988008000 | 26.559942000 | 21.360638000 |
| C  | 30.007968000 | 30.008237000 | 26.695581000 | C  | 22.003898000 | 26.544889000 | 20.384593000 |
| C  | 30.008286000 | 26.697416000 | 30.008420000 | H  | 23.999268000 | 26.397044000 | 21.176773000 |
| C  | 23.753697000 | 10.313401000 | 13.255234000 | H  | 22.313835000 | 26.284144000 | 19.491341000 |
| C  | 23.753135000 | 13.257746000 | 10.312720000 | C  | 22.671082000 | 17.650268000 | 13.440450000 |
| C  | 26.696398000 | 10.313244000 | 10.313104000 | C  | 20.687003000 | 19.634347000 | 13.440450000 |
| C  | 30.008286000 | 10.312930000 | 13.623934000 | O  | 13.440450000 | 24.934185000 | 9.894590000  |
| C  | 30.007968000 | 13.625768000 | 10.313113000 | C  | 13.440450000 | 23.727502000 | 10.287052000 |
| H  | 27.351814000 | 30.759513000 | 23.002127000 | O  | 13.440450000 | 24.934185000 | 16.986310000 |
| H  | 30.758179000 | 27.358190000 | 23.003211000 | C  | 13.440450000 | 23.727502000 | 16.593848000 |
| H  | 23.008991000 | 23.009158000 | 26.377462000 | O  | 13.440450000 | 23.335040000 | 15.387165000 |
| H  | 27.355985000 | 23.003402000 | 30.758391000 | O  | 13.440450000 | 23.335040000 | 11.493735000 |
| H  | 30.757581000 | 23.004153000 | 27.359935000 | C  | 18.960712000 | 26.559942000 | 17.333342000 |
| H  | 23.008991000 | 13.943888000 | 17.312192000 | C  | 19.936757000 | 26.544889000 | 18.317452000 |
| H  | 27.355985000 | 9.562959000  | 17.317948000 | H  | 19.144577000 | 26.397044000 | 16.322082000 |
| H  | 30.757582000 | 12.961415000 | 17.317197000 | H  | 20.830009000 | 26.284144000 | 18.007515000 |
| H  | 27.351814000 | 17.319223000 | 9.561837000  | C  | 21.360638000 | 17.333342000 | 13.119492000 |
| H  | 30.758179000 | 17.318139000 | 12.963160000 | C  | 20.384593000 | 18.317452000 | 13.104439000 |
| H  | 23.003255000 | 27.356162000 | 30.758555000 | H  | 21.176773000 | 16.322082000 | 12.956594000 |
| H  | 23.001913000 | 30.759916000 | 27.349810000 | H  | 19.491341000 | 18.007515000 | 12.843694000 |
| H  | 26.407446000 | 30.758917000 | 30.758911000 | C  | 22.988008000 | 18.960712000 | 13.761408000 |
| H  | 30.758582000 | 30.758568000 | 26.405278000 | C  | 22.003898000 | 19.936757000 | 13.776461000 |
| H  | 30.759373000 | 26.409850000 | 30.759355000 | H  | 23.999268000 | 19.144577000 | 13.924306000 |
| H  | 23.003255000 | 9.562795000  | 12.965188000 | H  | 22.313835000 | 20.830009000 | 14.037206000 |
| H  | 23.001913000 | 12.971540000 | 9.561434000  | Zr | 10.956924000 | 26.880900000 | 13.440450000 |
| H  | 26.407446000 | 9.562439000  | 9.562434000  | O  | 9.894590000  | 26.880900000 | 11.493735000 |
| H  | 30.759373000 | 9.561995000  | 13.911500000 | O  | 12.408223000 | 27.913127000 | 14.472677000 |
| H  | 30.758582000 | 13.916071000 | 9.562782000  | C  | 10.287052000 | 26.880900000 | 10.287052000 |
| H  | 25.215026000 | 11.776433000 | 15.102845000 | Zr | 15.923976000 | 26.880900000 | 13.440450000 |
| H  | 28.544134000 | 11.776251000 | 11.775822000 | O  | 16.986310000 | 26.880900000 | 11.493735000 |
| H  | 28.555271000 | 15.099035000 | 15.098322000 | C  | 16.593848000 | 26.880900000 | 10.287052000 |
| H  | 25.215244000 | 15.103495000 | 11.776660000 | O  | 16.986310000 | 26.880900000 | 15.387165000 |
| H  | 25.215244000 | 28.544690000 | 25.217855000 | O  | 14.472677000 | 27.913127000 | 12.408223000 |
| H  | 28.555271000 | 25.223028000 | 25.222315000 | C  | 16.593848000 | 26.880900000 | 16.593848000 |
| H  | 28.544134000 | 28.545528000 | 28.545099000 | C  | 17.650268000 | 26.880900000 | 17.650268000 |
| H  | 25.215026000 | 25.218505000 | 28.544917000 | C  | 19.634347000 | 26.880900000 | 19.634347000 |
| O  | 14.472677000 | 25.848673000 | 14.472677000 | O  | 9.894590000  | 26.880900000 | 15.387165000 |
| O  | 12.408223000 | 25.848673000 | 12.408223000 | C  | 10.287052000 | 26.880900000 | 16.593848000 |
| O  | 14.472677000 | 25.848673000 | 12.408223000 | Zr | 13.440450000 | 26.880900000 | 15.923976000 |
| O  | 12.408223000 | 25.848673000 | 14.472677000 | O  | 11.493735000 | 26.880900000 | 16.986310000 |
| Zr | 13.440450000 | 24.397374000 | 13.440450000 | O  | 14.472677000 | 27.913127000 | 14.472677000 |
| O  | 11.493735000 | 23.335040000 | 13.440450000 | Zr | 13.440450000 | 26.880900000 | 10.956924000 |
| C  | 10.287052000 | 23.727502000 | 13.440450000 | O  | 11.493735000 | 26.880900000 | 9.894590000  |
| O  | 15.387165000 | 23.335040000 | 13.440450000 | O  | 15.387165000 | 26.880900000 | 9.894590000  |
| C  | 16.593848000 | 23.727502000 | 13.440450000 | O  | 12.408223000 | 27.913127000 | 12.408223000 |
| C  | 17.650268000 | 22.671082000 | 13.440450000 | O  | 15.387165000 | 26.880900000 | 16.986310000 |
| C  | 19.634347000 | 20.687003000 | 13.440450000 | Zr | 13.440450000 | 29.364426000 | 13.440450000 |
| C  | 18.960712000 | 22.988008000 | 13.761408000 | O  | 11.493735000 | 30.426760000 | 13.440450000 |
| C  | 19.936757000 | 22.003898000 | 13.776461000 | C  | 10.287052000 | 30.034298000 | 13.440450000 |
| H  | 19.144577000 | 23.999268000 | 13.924306000 | O  | 15.387165000 | 30.426760000 | 13.440450000 |
| H  | 20.830009000 | 22.313835000 | 14.037206000 | C  | 16.593848000 | 30.034298000 | 13.440450000 |
| O  | 9.894590000  | 24.934185000 | 13.440450000 | O  | 16.986310000 | 28.827615000 | 13.440450000 |
| O  | 16.986310000 | 24.934185000 | 13.440450000 | O  | 9.894590000  | 28.827615000 | 13.440450000 |
| C  | 17.333342000 | 21.360638000 | 13.119492000 | C  | 22.671082000 | 26.880900000 | 22.671082000 |

|    |              |              |              |               |              |              |              |
|----|--------------|--------------|--------------|---------------|--------------|--------------|--------------|
| C  | 20.687003000 | 26.880900000 | 20.687003000 | C             | 27.214267000 | 20.138269000 | 13.739391000 |
| C  | 21.360638000 | 27.201858000 | 22.988008000 | H             | 26.305813000 | 19.885874000 | 14.298799000 |
| C  | 20.384593000 | 27.216911000 | 22.003898000 | H             | 30.421012000 | 21.034192000 | 14.609897000 |
| H  | 21.176773000 | 27.364756000 | 23.999268000 | H             | 27.670076000 | 21.654510000 | 10.474973000 |
| H  | 19.491341000 | 27.477656000 | 22.313835000 | H             | 24.666866000 | 22.133995000 | 10.737335000 |
| O  | 13.440450000 | 28.827615000 | 16.986310000 | H             | 27.362818000 | 19.370003000 | 12.965405000 |
| C  | 13.440450000 | 30.034298000 | 16.593848000 | H             | 29.982907000 | 20.065324000 | 13.196108000 |
| O  | 13.440450000 | 28.827615000 | 9.894590000  | H             | 26.316074000 | 24.365128000 | 10.885940000 |
| C  | 13.440450000 | 30.034298000 | 10.287052000 | H             | 27.955565000 | 24.120251000 | 10.331704000 |
| O  | 13.440450000 | 30.426760000 | 15.387165000 | H             | 28.632454000 | 19.229917000 | 15.066673000 |
| O  | 13.440450000 | 30.426760000 | 11.493735000 | H             | 28.156322000 | 20.888577000 | 15.506799000 |
| C  | 17.333342000 | 27.201858000 | 18.960712000 | H             | 28.586727000 | 24.277713000 | 12.547443000 |
| C  | 18.317452000 | 27.216911000 | 19.936757000 | H             | 26.946255000 | 24.128937000 | 13.108400000 |
| H  | 16.322082000 | 27.364756000 | 19.144577000 | H             | 25.385289000 | 22.766610000 | 12.927353000 |
| H  | 18.007515000 | 27.477656000 | 20.830009000 | H             | 24.946943000 | 21.092197000 | 13.071798000 |
| H  | 13.440450000 | 30.790903000 | 9.530447000  | C             | 30.191269000 | 24.465077000 | 15.113067000 |
| H  | 17.350453000 | 26.880900000 | 9.530447000  | O             | 30.677671000 | 25.090509000 | 16.042447000 |
| H  | 17.350453000 | 30.790903000 | 13.440450000 | O             | 30.659979000 | 24.057432000 | 14.017448000 |
| H  | 13.440450000 | 30.790903000 | 17.350453000 | <b>g. TS2</b> |              |              |              |
| H  | 9.530447000  | 30.790903000 | 13.440450000 | N             | 26.417585000 | 21.825219000 | 20.419236000 |
| H  | 9.530447000  | 26.880900000 | 17.350453000 | N             | 26.685816000 | 19.916740000 | 18.475528000 |
| H  | 13.440450000 | 22.970897000 | 9.530447000  | C             | 26.692346000 | 20.551901000 | 20.811660000 |
| H  | 9.530447000  | 22.970897000 | 13.440450000 | C             | 26.464522000 | 22.817455000 | 21.330221000 |
| H  | 13.440450000 | 22.970897000 | 17.350453000 | C             | 26.677169000 | 18.996230000 | 17.491703000 |
| H  | 15.026933000 | 25.294417000 | 11.853967000 | C             | 26.675969000 | 19.500975000 | 19.768008000 |
| H  | 11.853967000 | 28.467383000 | 11.853967000 | C             | 26.981239000 | 20.277596000 | 22.156775000 |
| H  | 9.530447000  | 26.880900000 | 9.530447000  | C             | 26.729162000 | 22.624197000 | 22.695332000 |
| H  | 15.026933000 | 28.467383000 | 15.026933000 | C             | 26.707526000 | 17.613621000 | 17.699731000 |
| H  | 11.853967000 | 25.294417000 | 15.026933000 | C             | 26.634258000 | 18.128031000 | 20.063980000 |
| H  | 26.625770000 | 23.866896000 | 20.913915000 | C             | 26.978232000 | 21.299197000 | 23.093088000 |
| H  | 26.788590000 | 19.393991000 | 16.460624000 | C             | 26.665596000 | 17.192634000 | 19.042752000 |
| H  | 26.780003000 | 19.241548000 | 22.492450000 | C             | 26.809925000 | 23.730886000 | 23.728973000 |
| H  | 26.341370000 | 17.838820000 | 21.063584000 | C             | 26.809925000 | 16.592377000 | 16.590464000 |
| H  | 26.810704000 | 21.067038000 | 24.160564000 | O             | 26.880885000 | 24.934153000 | 23.334955000 |
| H  | 26.477508000 | 16.155250000 | 19.257200000 | O             | 26.880903000 | 23.334945000 | 24.934136000 |
| Cu | 27.037445000 | 21.897844000 | 17.903507000 | O             | 26.880903000 | 15.387214000 | 16.986405000 |
| I  | 24.997799000 | 22.137545000 | 16.301149000 | O             | 26.880885000 | 16.986395000 | 15.387197000 |
| C  | 28.356637000 | 23.363251000 | 17.437082000 | Zr            | 26.878142000 | 26.881612000 | 24.237883000 |
| C  | 28.884305000 | 22.550899000 | 18.224203000 | Zr            | 26.878209000 | 24.239690000 | 26.880717000 |
| H  | 29.616771000 | 22.120879000 | 18.879328000 | Zr            | 26.878209000 | 13.440633000 | 16.081660000 |
| C  | 28.168886000 | 24.431531000 | 16.434587000 | Zr            | 26.878142000 | 16.083467000 | 13.439738000 |
| H  | 28.625588000 | 25.344641000 | 16.840116000 | O             | 24.934203000 | 26.880849000 | 23.334882000 |
| H  | 27.103278000 | 24.593035000 | 16.243194000 | O             | 25.848911000 | 25.848918000 | 25.848917000 |
| O  | 28.782217000 | 24.086280000 | 15.216161000 | O             | 25.849015000 | 27.912768000 | 25.849028000 |
| H  | 29.863850000 | 22.872216000 | 13.443930000 | O             | 27.912782000 | 25.849032000 | 25.849031000 |
| C  | 26.800031000 | 22.320871000 | 10.393347000 | O             | 27.912889000 | 27.912886000 | 25.848919000 |
| C  | 27.174849000 | 23.688095000 | 10.964606000 | O             | 26.880945000 | 28.827581000 | 23.334856000 |
| C  | 27.679675000 | 23.680520000 | 12.429574000 | O             | 28.827591000 | 26.880922000 | 23.334870000 |
| C  | 25.599286000 | 21.661070000 | 11.068785000 | O             | 24.934197000 | 23.334881000 | 26.880846000 |
| C  | 27.982915000 | 22.316533000 | 12.964760000 | O             | 25.849012000 | 25.849025000 | 27.912771000 |
| C  | 25.657762000 | 21.761986000 | 12.588943000 | O             | 27.912892000 | 25.848913000 | 27.912887000 |
| N  | 26.984169000 | 21.439680000 | 13.112449000 | O             | 26.880944000 | 23.334850000 | 28.827576000 |
| H  | 26.605900000 | 22.417092000 | 9.320016000  | O             | 28.827591000 | 23.334868000 | 26.880917000 |
| H  | 25.538851000 | 20.608416000 | 10.764823000 | O             | 25.849012000 | 12.408579000 | 14.472325000 |
| C  | 29.600452000 | 20.790936000 | 13.927943000 | O             | 25.848911000 | 14.472433000 | 14.472432000 |
| N  | 29.235588000 | 22.022871000 | 13.247895000 | O             | 24.934197000 | 13.440504000 | 16.986469000 |
| C  | 28.408414000 | 20.222830000 | 14.667954000 | O             | 26.880944000 | 11.493774000 | 16.986500000 |

## ARTICLE

## Journal Name

|    |              |              |              |    |              |              |              |
|----|--------------|--------------|--------------|----|--------------|--------------|--------------|
| O  | 27.912892000 | 12.408463000 | 14.472437000 | O  | 30.426936000 | 15.387151000 | 13.440421000 |
| O  | 27.912782000 | 14.472319000 | 14.472318000 | O  | 30.426946000 | 13.440483000 | 11.493756000 |
| O  | 28.827591000 | 13.440433000 | 16.986482000 | O  | 30.426933000 | 13.440426000 | 15.387152000 |
| O  | 25.849015000 | 14.472322000 | 12.408582000 | O  | 24.934210000 | 13.440425000 | 9.894409000  |
| O  | 24.934203000 | 16.986468000 | 13.440501000 | O  | 26.880879000 | 11.493760000 | 9.894408000  |
| O  | 27.912889000 | 14.472431000 | 12.408464000 | O  | 26.880889000 | 15.387147000 | 9.894411000  |
| O  | 26.880945000 | 16.986494000 | 11.493769000 | O  | 28.827596000 | 13.440487000 | 9.894406000  |
| O  | 28.827591000 | 16.986480000 | 13.440428000 | C  | 23.753697000 | 27.066116000 | 30.007949000 |
| C  | 23.755332000 | 26.686089000 | 23.755213000 | C  | 23.753135000 | 30.008630000 | 27.063604000 |
| Zr | 24.236612000 | 26.881475000 | 26.880552000 | C  | 26.696398000 | 30.008246000 | 30.008106000 |
| Zr | 26.880671000 | 29.524609000 | 26.880680000 | C  | 30.007968000 | 30.008237000 | 26.695581000 |
| Zr | 29.524440000 | 26.882357000 | 26.881381000 | C  | 30.008286000 | 26.697416000 | 30.008420000 |
| C  | 27.064326000 | 30.008530000 | 23.753165000 | C  | 23.753697000 | 10.313401000 | 13.255234000 |
| C  | 30.008123000 | 27.066993000 | 23.753823000 | C  | 23.753135000 | 13.257746000 | 10.312720000 |
| C  | 23.755714000 | 23.756676000 | 26.684338000 | C  | 26.696398000 | 10.313244000 | 10.313104000 |
| Zr | 26.880615000 | 26.881402000 | 29.524137000 | C  | 30.008286000 | 10.312930000 | 13.623934000 |
| C  | 27.065914000 | 23.754135000 | 30.008060000 | C  | 30.007968000 | 13.625768000 | 10.313113000 |
| C  | 30.007964000 | 23.754748000 | 27.067567000 | H  | 27.351814000 | 30.759513000 | 23.002127000 |
| Zr | 24.236612000 | 13.440798000 | 13.439875000 | H  | 30.758179000 | 27.358190000 | 23.003211000 |
| Zr | 26.880615000 | 10.797213000 | 13.439948000 | H  | 23.008991000 | 23.009158000 | 26.377462000 |
| C  | 23.755714000 | 13.637012000 | 16.564674000 | H  | 27.355985000 | 23.003402000 | 30.758391000 |
| C  | 27.065914000 | 10.313290000 | 16.567215000 | H  | 30.757581000 | 23.004153000 | 27.359935000 |
| Zr | 29.524440000 | 13.439969000 | 13.438993000 | H  | 23.008991000 | 13.943888000 | 17.312192000 |
| C  | 30.007964000 | 13.253783000 | 16.566602000 | H  | 27.355985000 | 9.562959000  | 17.317948000 |
| Zr | 26.880671000 | 13.440670000 | 10.796741000 | H  | 30.757582000 | 12.961415000 | 17.317197000 |
| C  | 23.755332000 | 16.566137000 | 13.635261000 | H  | 27.351814000 | 17.319223000 | 9.561837000  |
| C  | 27.064326000 | 16.568185000 | 10.312820000 | H  | 30.758179000 | 17.318139000 | 12.963160000 |
| C  | 30.008123000 | 16.567527000 | 13.254357000 | H  | 23.003255000 | 27.356162000 | 30.758555000 |
| O  | 23.334855000 | 26.880866000 | 24.934215000 | H  | 23.001913000 | 30.759916000 | 27.349810000 |
| O  | 23.334856000 | 24.934212000 | 26.880862000 | H  | 26.407446000 | 30.758917000 | 30.758911000 |
| O  | 25.848909000 | 27.912895000 | 27.912897000 | H  | 30.758582000 | 30.758568000 | 26.405278000 |
| O  | 23.334862000 | 26.880939000 | 28.827594000 | H  | 30.759373000 | 26.409850000 | 30.759355000 |
| O  | 23.334864000 | 28.827596000 | 26.880937000 | H  | 23.003255000 | 9.562795000  | 12.965188000 |
| O  | 24.934210000 | 30.426941000 | 26.880925000 | H  | 23.001913000 | 12.971540000 | 9.561434000  |
| O  | 26.880889000 | 30.426939000 | 24.934203000 | H  | 26.407446000 | 9.562439000  | 9.562434000  |
| O  | 26.880879000 | 30.426942000 | 28.827590000 | H  | 30.759373000 | 9.561995000  | 13.911500000 |
| O  | 27.912786000 | 27.912776000 | 27.912777000 | H  | 30.758582000 | 13.916071000 | 9.562782000  |
| O  | 28.827596000 | 30.426944000 | 26.880863000 | H  | 25.215026000 | 11.776433000 | 15.102845000 |
| O  | 30.426933000 | 24.934198000 | 26.880924000 | H  | 28.544134000 | 11.776251000 | 11.775822000 |
| O  | 30.426936000 | 26.880929000 | 24.934199000 | H  | 28.555271000 | 15.099035000 | 15.098322000 |
| O  | 30.426944000 | 26.880866000 | 28.827595000 | H  | 25.215244000 | 15.103495000 | 11.776660000 |
| O  | 30.426946000 | 28.827594000 | 26.880867000 | H  | 25.215244000 | 28.544690000 | 25.217855000 |
| O  | 24.934211000 | 26.880924000 | 30.426942000 | H  | 28.555271000 | 25.223028000 | 25.222315000 |
| O  | 26.880889000 | 24.934201000 | 30.426937000 | H  | 28.544134000 | 28.545528000 | 28.545099000 |
| O  | 26.880878000 | 28.827589000 | 30.426943000 | H  | 25.215026000 | 25.218505000 | 28.544917000 |
| O  | 28.827598000 | 26.880862000 | 30.426940000 | O  | 14.472677000 | 25.848673000 | 14.472677000 |
| O  | 25.848909000 | 12.408453000 | 12.408455000 | O  | 12.408223000 | 25.848673000 | 12.408223000 |
| O  | 23.334862000 | 11.493756000 | 13.440411000 | O  | 14.472677000 | 25.848673000 | 12.408223000 |
| O  | 23.334855000 | 15.387135000 | 13.440484000 | O  | 12.408223000 | 25.848673000 | 14.472677000 |
| O  | 23.334864000 | 13.440413000 | 11.493754000 | Zr | 13.440450000 | 24.397374000 | 13.440450000 |
| O  | 23.334856000 | 13.440488000 | 15.387138000 | O  | 11.493735000 | 23.335040000 | 13.440450000 |
| O  | 24.934211000 | 9.894408000  | 13.440426000 | C  | 10.287052000 | 23.727502000 | 13.440450000 |
| O  | 26.880889000 | 9.894413000  | 15.387149000 | O  | 15.387165000 | 23.335040000 | 13.440450000 |
| O  | 27.912786000 | 12.408573000 | 12.408574000 | C  | 16.593848000 | 23.727502000 | 13.440450000 |
| O  | 26.880878000 | 9.894407000  | 11.493761000 | C  | 17.650268000 | 22.671082000 | 13.440450000 |
| O  | 28.827598000 | 9.894410000  | 13.440488000 | C  | 19.634347000 | 20.687003000 | 13.440450000 |
| O  | 30.426944000 | 11.493755000 | 13.440484000 | C  | 18.960712000 | 22.988008000 | 13.761408000 |

|    |              |              |              |    |              |              |              |
|----|--------------|--------------|--------------|----|--------------|--------------|--------------|
| C  | 19.936757000 | 22.003898000 | 13.776461000 | C  | 10.287052000 | 30.034298000 | 13.440450000 |
| H  | 19.144577000 | 23.999268000 | 13.924306000 | O  | 15.387165000 | 30.426760000 | 13.440450000 |
| H  | 20.830009000 | 22.313835000 | 14.037206000 | C  | 16.593848000 | 30.034298000 | 13.440450000 |
| O  | 9.894590000  | 24.934185000 | 13.440450000 | O  | 16.986310000 | 28.827615000 | 13.440450000 |
| O  | 16.986310000 | 24.934185000 | 13.440450000 | O  | 9.894590000  | 28.827615000 | 13.440450000 |
| C  | 17.333342000 | 21.360638000 | 13.119492000 | C  | 22.671082000 | 26.880900000 | 22.671082000 |
| C  | 18.317452000 | 20.384593000 | 13.104439000 | C  | 20.687003000 | 26.880900000 | 20.687003000 |
| H  | 16.322082000 | 21.176773000 | 12.956594000 | C  | 21.360638000 | 27.201858000 | 22.988008000 |
| H  | 18.007515000 | 19.491341000 | 12.843694000 | C  | 20.384593000 | 27.216911000 | 22.003898000 |
| C  | 22.988008000 | 26.559942000 | 21.360638000 | H  | 21.176773000 | 27.364756000 | 23.999268000 |
| C  | 22.003898000 | 26.544889000 | 20.384593000 | H  | 19.491341000 | 27.477656000 | 22.313835000 |
| H  | 23.999268000 | 26.397044000 | 21.176773000 | O  | 13.440450000 | 28.827615000 | 16.986310000 |
| H  | 22.313835000 | 26.284144000 | 19.491341000 | C  | 13.440450000 | 30.034298000 | 16.593848000 |
| C  | 22.671082000 | 17.650268000 | 13.440450000 | O  | 13.440450000 | 28.827615000 | 9.894590000  |
| C  | 20.687003000 | 19.634347000 | 13.440450000 | C  | 13.440450000 | 30.034298000 | 10.287052000 |
| O  | 13.440450000 | 24.934185000 | 9.894590000  | O  | 13.440450000 | 30.426760000 | 15.387165000 |
| C  | 13.440450000 | 23.727502000 | 10.287052000 | O  | 13.440450000 | 30.426760000 | 11.493735000 |
| O  | 13.440450000 | 24.934185000 | 16.986310000 | C  | 17.333342000 | 27.201858000 | 18.960712000 |
| C  | 13.440450000 | 23.727502000 | 16.593848000 | C  | 18.317452000 | 27.216911000 | 19.936757000 |
| O  | 13.440450000 | 23.335040000 | 15.387165000 | H  | 16.322082000 | 27.364756000 | 19.144577000 |
| O  | 13.440450000 | 23.335040000 | 11.493735000 | H  | 18.007515000 | 27.477656000 | 20.830009000 |
| C  | 18.960712000 | 26.559942000 | 17.333342000 | H  | 13.440450000 | 30.790903000 | 9.530447000  |
| C  | 19.936757000 | 26.544889000 | 18.317452000 | H  | 17.350453000 | 26.880900000 | 9.530447000  |
| H  | 19.144577000 | 26.397044000 | 16.322082000 | H  | 17.350453000 | 30.790903000 | 13.440450000 |
| H  | 20.830009000 | 26.284144000 | 18.007515000 | H  | 13.440450000 | 30.790903000 | 17.350453000 |
| C  | 21.360638000 | 17.333342000 | 13.119492000 | H  | 9.530447000  | 30.790903000 | 13.440450000 |
| C  | 20.384593000 | 18.317452000 | 13.104439000 | H  | 9.530447000  | 26.880900000 | 17.350453000 |
| H  | 21.176773000 | 16.322082000 | 12.956594000 | H  | 13.440450000 | 22.970897000 | 9.530447000  |
| H  | 19.491341000 | 18.007515000 | 12.843694000 | H  | 9.530447000  | 22.970897000 | 13.440450000 |
| C  | 22.988008000 | 18.960712000 | 13.761408000 | H  | 13.440450000 | 22.970897000 | 17.350453000 |
| C  | 22.003898000 | 19.936757000 | 13.776461000 | H  | 15.026933000 | 25.294417000 | 11.853967000 |
| H  | 23.999268000 | 19.144577000 | 13.924306000 | H  | 11.853967000 | 28.467383000 | 11.853967000 |
| H  | 22.313835000 | 20.830009000 | 14.037206000 | H  | 9.530447000  | 26.880900000 | 9.530447000  |
| Zr | 10.956924000 | 26.880900000 | 13.440450000 | H  | 15.026933000 | 28.467383000 | 15.026933000 |
| O  | 9.894590000  | 26.880900000 | 11.493735000 | H  | 11.853967000 | 25.294417000 | 15.026933000 |
| O  | 12.408223000 | 27.913127000 | 14.472677000 | H  | 26.268186000 | 23.816261000 | 20.945410000 |
| C  | 10.287052000 | 26.880900000 | 10.287052000 | H  | 26.642922000 | 19.391539000 | 16.479901000 |
| Zr | 15.923976000 | 26.880900000 | 13.440450000 | H  | 27.227126000 | 19.267051000 | 22.467964000 |
| O  | 16.986310000 | 26.880900000 | 11.493735000 | H  | 26.561684000 | 17.792954000 | 21.093951000 |
| C  | 16.593848000 | 26.880900000 | 10.287052000 | H  | 27.193969000 | 21.095968000 | 24.136916000 |
| O  | 16.986310000 | 26.880900000 | 15.387165000 | H  | 26.651663000 | 16.130282000 | 19.262364000 |
| O  | 14.472677000 | 27.913127000 | 12.408223000 | Cu | 26.094176000 | 21.955409000 | 18.272621000 |
| C  | 16.593848000 | 26.880900000 | 16.593848000 | I  | 23.759574000 | 21.227541000 | 17.146963000 |
| C  | 17.650268000 | 26.880900000 | 17.650268000 | C  | 26.295999000 | 24.237309000 | 16.755456000 |
| C  | 19.634347000 | 26.880900000 | 19.634347000 | C  | 27.066882000 | 23.466506000 | 17.408502000 |
| O  | 9.894590000  | 26.880900000 | 15.387165000 | H  | 28.149561000 | 23.432062000 | 17.375435000 |
| C  | 10.287052000 | 26.880900000 | 16.593848000 | C  | 24.993375000 | 24.750183000 | 16.354280000 |
| Zr | 13.440450000 | 26.880900000 | 15.923976000 | H  | 24.870436000 | 25.794039000 | 16.673098000 |
| O  | 11.493735000 | 26.880900000 | 16.986310000 | H  | 24.201093000 | 24.137341000 | 16.804427000 |
| O  | 14.472677000 | 27.913127000 | 14.472677000 | O  | 24.866896000 | 24.653692000 | 14.940722000 |
| Zr | 13.440450000 | 26.880900000 | 10.956924000 | H  | 25.198985000 | 22.829982000 | 14.543056000 |
| O  | 11.493735000 | 26.880900000 | 9.894590000  | C  | 25.695467000 | 23.211839000 | 10.419206000 |
| O  | 15.387165000 | 26.880900000 | 9.894590000  | C  | 24.353073000 | 23.504961000 | 11.082204000 |
| O  | 12.408223000 | 27.913127000 | 12.408223000 | C  | 24.020569000 | 22.631199000 | 12.320485000 |
| O  | 15.387165000 | 26.880900000 | 16.986310000 | C  | 25.796660000 | 21.836590000 | 9.763161000  |
| Zr | 13.440450000 | 29.364426000 | 13.440450000 | C  | 25.177123000 | 21.826737000 | 12.821621000 |
| O  | 11.493735000 | 30.426760000 | 13.440450000 | C  | 25.260157000 | 20.728949000 | 10.666700000 |

## ARTICLE

## Journal Name

|               |              |              |              |    |              |              |              |
|---------------|--------------|--------------|--------------|----|--------------|--------------|--------------|
| N             | 25.713202000 | 20.871836000 | 12.048249000 | O  | 26.880944000 | 23.334850000 | 28.827576000 |
| H             | 25.899258000 | 23.983823000 | 9.671171000  | O  | 28.827591000 | 23.334868000 | 26.880917000 |
| H             | 26.839499000 | 21.629677000 | 9.492847000  | O  | 25.849012000 | 12.408579000 | 14.472325000 |
| C             | 26.832005000 | 21.450864000 | 14.593606000 | O  | 25.848911000 | 14.472433000 | 14.472432000 |
| N             | 25.651755000 | 22.074535000 | 14.021112000 | O  | 24.934197000 | 13.440504000 | 16.986469000 |
| C             | 27.064443000 | 20.105329000 | 13.940039000 | O  | 26.880944000 | 11.493774000 | 16.986500000 |
| C             | 26.971542000 | 20.226929000 | 12.431979000 | O  | 27.912892000 | 12.408463000 | 14.472437000 |
| H             | 26.997765000 | 19.242200000 | 11.957181000 | O  | 27.912782000 | 14.472319000 | 14.472318000 |
| H             | 26.657693000 | 21.368490000 | 15.673593000 | O  | 28.827591000 | 13.440433000 | 16.986482000 |
| H             | 26.479851000 | 23.336645000 | 11.176638000 | O  | 25.849015000 | 14.472322000 | 12.408582000 |
| H             | 25.225542000 | 21.810629000 | 8.826887000  | O  | 24.934203000 | 16.986468000 | 13.440501000 |
| H             | 27.811224000 | 20.817391000 | 12.034480000 | O  | 27.912889000 | 14.472431000 | 12.408464000 |
| H             | 27.684056000 | 22.130346000 | 14.454666000 | O  | 26.880945000 | 16.986494000 | 11.493769000 |
| H             | 23.541147000 | 23.404308000 | 10.351201000 | O  | 28.827591000 | 16.986480000 | 13.440428000 |
| H             | 24.376231000 | 24.541799000 | 11.419547000 | C  | 23.755332000 | 26.686089000 | 23.755213000 |
| H             | 28.043095000 | 19.706110000 | 14.218185000 | Zr | 24.236612000 | 26.881475000 | 26.880552000 |
| H             | 26.317148000 | 19.386664000 | 14.293212000 | Zr | 26.880671000 | 29.524609000 | 26.880680000 |
| H             | 23.678140000 | 23.262818000 | 13.143482000 | Zr | 29.524440000 | 26.882357000 | 26.881381000 |
| H             | 23.205021000 | 21.937681000 | 12.089668000 | C  | 27.064326000 | 30.008530000 | 23.753165000 |
| H             | 24.165482000 | 20.730654000 | 10.665046000 | C  | 30.008123000 | 27.066993000 | 23.753823000 |
| H             | 25.568096000 | 19.733779000 | 10.331593000 | C  | 23.755714000 | 23.756676000 | 26.684338000 |
| C             | 26.115627000 | 25.014700000 | 14.300837000 | Zr | 26.880615000 | 26.881402000 | 29.524137000 |
| O             | 27.042460000 | 25.247418000 | 15.125445000 | C  | 27.065914000 | 23.754135000 | 30.008060000 |
| O             | 26.081212000 | 24.977818000 | 13.077839000 | C  | 30.007964000 | 23.754748000 | 27.067567000 |
| <b>h. IM2</b> |              |              |              | Zr | 24.236612000 | 13.440798000 | 13.439875000 |
| N             | 26.662625000 | 21.842198000 | 20.409511000 | Zr | 26.880615000 | 10.797213000 | 13.439948000 |
| N             | 26.539854000 | 19.925829000 | 18.479127000 | C  | 23.755714000 | 13.637012000 | 16.564674000 |
| C             | 26.660192000 | 20.549449000 | 20.823044000 | C  | 27.065914000 | 10.313290000 | 16.567215000 |
| C             | 26.652010000 | 22.829145000 | 21.325412000 | Zr | 29.524440000 | 13.439969000 | 13.438993000 |
| C             | 26.578214000 | 19.007578000 | 17.493029000 | C  | 30.007964000 | 13.253783000 | 16.566602000 |
| C             | 26.677570000 | 19.510630000 | 19.769374000 | Zr | 26.880671000 | 13.440670000 | 10.796741000 |
| C             | 26.643018000 | 20.255739000 | 22.197552000 | C  | 23.755332000 | 16.566137000 | 13.635261000 |
| C             | 26.700346000 | 22.621978000 | 22.708041000 | C  | 27.064326000 | 16.568185000 | 10.312820000 |
| C             | 26.723720000 | 17.625602000 | 17.695077000 | C  | 30.008123000 | 16.567527000 | 13.254357000 |
| C             | 26.840838000 | 18.145685000 | 20.055309000 | O  | 23.334855000 | 26.880866000 | 24.934215000 |
| C             | 26.680786000 | 21.278612000 | 23.130125000 | O  | 23.334856000 | 24.934212000 | 26.880862000 |
| C             | 26.849796000 | 17.211409000 | 19.033685000 | O  | 25.848909000 | 27.912895000 | 27.912897000 |
| C             | 26.809925000 | 23.730886000 | 23.728973000 | O  | 23.334862000 | 26.880939000 | 28.827594000 |
| C             | 26.809925000 | 16.592377000 | 16.590464000 | O  | 23.334864000 | 28.827596000 | 26.880937000 |
| O             | 26.880885000 | 24.934153000 | 23.334955000 | O  | 24.934210000 | 30.426941000 | 26.880925000 |
| O             | 26.880903000 | 23.334945000 | 24.934136000 | O  | 26.880889000 | 30.426939000 | 24.934203000 |
| O             | 26.880903000 | 15.387214000 | 16.986405000 | O  | 26.880879000 | 30.426942000 | 28.827590000 |
| O             | 26.880885000 | 16.986395000 | 15.387197000 | O  | 27.912786000 | 27.912776000 | 27.912777000 |
| Zr            | 26.878142000 | 26.881612000 | 24.237883000 | O  | 28.827596000 | 30.426944000 | 26.880863000 |
| Zr            | 26.878209000 | 24.239690000 | 26.880717000 | O  | 30.426933000 | 24.934198000 | 26.880924000 |
| Zr            | 26.878209000 | 13.440633000 | 16.081660000 | O  | 30.426936000 | 26.880929000 | 24.934199000 |
| Zr            | 26.878142000 | 16.083467000 | 13.439738000 | O  | 30.426944000 | 26.880866000 | 28.827595000 |
| O             | 24.934203000 | 26.880849000 | 23.334882000 | O  | 30.426946000 | 28.827594000 | 26.880867000 |
| O             | 25.848911000 | 25.848918000 | 25.848917000 | O  | 24.934211000 | 26.880924000 | 30.426942000 |
| O             | 25.849015000 | 27.912768000 | 25.849028000 | O  | 26.880889000 | 24.934201000 | 30.426937000 |
| O             | 27.912782000 | 25.849032000 | 25.849031000 | O  | 26.880878000 | 28.827589000 | 30.426943000 |
| O             | 27.912889000 | 27.912886000 | 25.848919000 | O  | 28.827598000 | 26.880862000 | 30.426940000 |
| O             | 26.880945000 | 28.827581000 | 23.334856000 | O  | 25.848909000 | 12.408453000 | 12.408455000 |
| O             | 28.827591000 | 26.880922000 | 23.334870000 | O  | 23.334862000 | 11.493756000 | 13.440411000 |
| O             | 24.934197000 | 23.334881000 | 26.880846000 | O  | 23.334855000 | 15.387135000 | 13.440484000 |
| O             | 25.849012000 | 25.849025000 | 27.912771000 | O  | 23.334864000 | 13.440413000 | 11.493754000 |
| O             | 27.912892000 | 25.848913000 | 27.912887000 | O  | 23.334856000 | 13.440488000 | 15.387138000 |



| Journal Name |              |              |              | ARTICLE |              |              |              |
|--------------|--------------|--------------|--------------|---------|--------------|--------------|--------------|
| O            | 24.934211000 | 9.894408000  | 13.440426000 | C       | 10.287052000 | 23.727502000 | 13.440450000 |
| O            | 26.880889000 | 9.894413000  | 15.387149000 | O       | 15.387165000 | 23.335040000 | 13.440450000 |
| O            | 27.912786000 | 12.408573000 | 12.408574000 | C       | 16.593848000 | 23.727502000 | 13.440450000 |
| O            | 26.880878000 | 9.894407000  | 11.493761000 | C       | 17.650268000 | 22.671082000 | 13.440450000 |
| O            | 28.827598000 | 9.894410000  | 13.440488000 | C       | 19.634347000 | 20.687003000 | 13.440450000 |
| O            | 30.426944000 | 11.493755000 | 13.440484000 | C       | 18.960712000 | 22.988008000 | 13.761408000 |
| O            | 30.426936000 | 15.387151000 | 13.440421000 | C       | 19.936757000 | 22.003898000 | 13.776461000 |
| O            | 30.426946000 | 13.440483000 | 11.493756000 | H       | 19.144577000 | 23.999268000 | 13.924306000 |
| O            | 30.426933000 | 13.440426000 | 15.387152000 | H       | 20.830009000 | 22.313835000 | 14.037206000 |
| O            | 24.934210000 | 13.440425000 | 9.894409000  | O       | 9.894590000  | 24.934185000 | 13.440450000 |
| O            | 26.880879000 | 11.493760000 | 9.894408000  | O       | 16.986310000 | 24.934185000 | 13.440450000 |
| O            | 26.880889000 | 15.387147000 | 9.894411000  | C       | 17.333342000 | 21.360638000 | 13.119492000 |
| O            | 28.827596000 | 13.440487000 | 9.894406000  | C       | 18.317452000 | 20.384593000 | 13.104439000 |
| C            | 23.753697000 | 27.066116000 | 30.007949000 | H       | 16.322082000 | 21.176773000 | 12.956594000 |
| C            | 23.753135000 | 30.008630000 | 27.063604000 | H       | 18.007515000 | 19.491341000 | 12.843694000 |
| C            | 26.696398000 | 30.008246000 | 30.008106000 | C       | 22.988008000 | 26.559942000 | 21.360638000 |
| C            | 30.007968000 | 30.008237000 | 26.695581000 | C       | 22.003898000 | 26.544889000 | 20.384593000 |
| C            | 30.008286000 | 26.697416000 | 30.008420000 | H       | 23.999268000 | 26.397044000 | 21.176773000 |
| C            | 23.753697000 | 10.313401000 | 13.255234000 | H       | 22.313835000 | 26.284144000 | 19.491341000 |
| C            | 23.753135000 | 13.257746000 | 10.312720000 | C       | 22.671082000 | 17.650268000 | 13.440450000 |
| C            | 26.696398000 | 10.313244000 | 10.313104000 | C       | 20.687003000 | 19.634347000 | 13.440450000 |
| C            | 30.008286000 | 10.312930000 | 13.623934000 | O       | 13.440450000 | 24.934185000 | 9.894590000  |
| C            | 30.007968000 | 13.625768000 | 10.313113000 | C       | 13.440450000 | 23.727502000 | 10.287052000 |
| H            | 27.351814000 | 30.759513000 | 23.002127000 | O       | 13.440450000 | 24.934185000 | 16.986310000 |
| H            | 30.758179000 | 27.358190000 | 23.003211000 | C       | 13.440450000 | 23.727502000 | 16.593848000 |
| H            | 23.008991000 | 23.009158000 | 26.377462000 | O       | 13.440450000 | 23.335040000 | 15.387165000 |
| H            | 27.355985000 | 23.003402000 | 30.758391000 | O       | 13.440450000 | 23.335040000 | 11.493735000 |
| H            | 30.757581000 | 23.004153000 | 27.359935000 | C       | 18.960712000 | 26.559942000 | 17.333342000 |
| H            | 23.008991000 | 13.943888000 | 17.312192000 | C       | 19.936757000 | 26.544889000 | 18.317452000 |
| H            | 27.355985000 | 9.562959000  | 17.317948000 | H       | 19.144577000 | 26.397044000 | 16.322082000 |
| H            | 30.757582000 | 12.961415000 | 17.317197000 | H       | 20.830009000 | 26.284144000 | 18.007515000 |
| H            | 27.351814000 | 17.319223000 | 9.561837000  | C       | 21.360638000 | 17.333342000 | 13.119492000 |
| H            | 30.758179000 | 17.318139000 | 12.963160000 | C       | 20.384593000 | 18.317452000 | 13.104439000 |
| H            | 23.003255000 | 27.356162000 | 30.758555000 | H       | 21.176773000 | 16.322082000 | 12.956594000 |
| H            | 23.001913000 | 30.759916000 | 27.349810000 | H       | 19.491341000 | 18.007515000 | 12.843694000 |
| H            | 26.407446000 | 30.758917000 | 30.758911000 | C       | 22.988008000 | 18.960712000 | 13.761408000 |
| H            | 30.758582000 | 30.758568000 | 26.405278000 | C       | 22.003898000 | 19.936757000 | 13.776461000 |
| H            | 30.759373000 | 26.409850000 | 30.759355000 | H       | 23.999268000 | 19.144577000 | 13.924306000 |
| H            | 23.003255000 | 9.562795000  | 12.965188000 | H       | 22.313835000 | 20.830009000 | 14.037206000 |
| H            | 23.001913000 | 12.971540000 | 9.561434000  | Zr      | 10.956924000 | 26.880900000 | 13.440450000 |
| H            | 26.407446000 | 9.562439000  | 9.562434000  | O       | 9.894590000  | 26.880900000 | 11.493735000 |
| H            | 30.759373000 | 9.561995000  | 13.911500000 | O       | 12.408223000 | 27.913127000 | 14.472677000 |
| H            | 30.758582000 | 13.916071000 | 9.562782000  | C       | 10.287052000 | 26.880900000 | 10.287052000 |
| H            | 25.215026000 | 11.776433000 | 15.102845000 | Zr      | 15.923976000 | 26.880900000 | 13.440450000 |
| H            | 28.544134000 | 11.776251000 | 11.775822000 | O       | 16.986310000 | 26.880900000 | 11.493735000 |
| H            | 28.555271000 | 15.099035000 | 15.098322000 | C       | 16.593848000 | 26.880900000 | 10.287052000 |
| H            | 25.215244000 | 15.103495000 | 11.776660000 | O       | 16.986310000 | 26.880900000 | 15.387165000 |
| H            | 25.215244000 | 28.544690000 | 25.217855000 | O       | 14.472677000 | 27.913127000 | 12.408223000 |
| H            | 28.555271000 | 25.223028000 | 25.222315000 | C       | 16.593848000 | 26.880900000 | 16.593848000 |
| H            | 28.544134000 | 28.545528000 | 28.545099000 | C       | 17.650268000 | 26.880900000 | 17.650268000 |
| H            | 25.215026000 | 25.218505000 | 28.544917000 | C       | 19.634347000 | 26.880900000 | 19.634347000 |
| O            | 14.472677000 | 25.848673000 | 14.472677000 | O       | 9.894590000  | 26.880900000 | 15.387165000 |
| O            | 12.408223000 | 25.848673000 | 12.408223000 | C       | 10.287052000 | 26.880900000 | 16.593848000 |
| O            | 14.472677000 | 25.848673000 | 12.408223000 | Zr      | 13.440450000 | 26.880900000 | 15.923976000 |
| O            | 12.408223000 | 25.848673000 | 14.472677000 | O       | 11.493735000 | 26.880900000 | 16.986310000 |
| Zr           | 13.440450000 | 24.397374000 | 13.440450000 | O       | 14.472677000 | 27.913127000 | 14.472677000 |
| O            | 11.493735000 | 23.335040000 | 13.440450000 | Zr      | 13.440450000 | 26.880900000 | 10.956924000 |

## ARTICLE

## Journal Name

|    |              |              |              |               |              |              |              |
|----|--------------|--------------|--------------|---------------|--------------|--------------|--------------|
| O  | 11.493735000 | 26.880900000 | 9.894590000  | C             | 24.979470000 | 28.483567000 | 15.447690000 |
| O  | 15.387165000 | 26.880900000 | 9.894590000  | C             | 25.459683000 | 28.082727000 | 16.840704000 |
| O  | 12.408223000 | 27.913127000 | 12.408223000 | C             | 25.128213000 | 26.626746000 | 17.256887000 |
| O  | 15.387165000 | 26.880900000 | 16.986310000 | C             | 23.460390000 | 28.535431000 | 15.295582000 |
| Zr | 13.440450000 | 29.364426000 | 13.440450000 | C             | 24.605768000 | 25.764233000 | 16.155155000 |
| O  | 11.493735000 | 30.426760000 | 13.440450000 | C             | 22.774288000 | 27.327056000 | 15.925261000 |
| C  | 10.287052000 | 30.034298000 | 13.440450000 | N             | 23.437415000 | 26.068287000 | 15.584805000 |
| O  | 15.387165000 | 30.426760000 | 13.440450000 | H             | 25.403212000 | 29.457406000 | 15.186057000 |
| C  | 16.593848000 | 30.034298000 | 13.440450000 | H             | 23.195604000 | 28.610424000 | 14.234186000 |
| O  | 16.986310000 | 28.827615000 | 13.440450000 | C             | 24.845135000 | 23.703860000 | 14.839676000 |
| O  | 9.894590000  | 28.827615000 | 13.440450000 | N             | 25.327794000 | 24.740810000 | 15.742670000 |
| C  | 22.671082000 | 26.880900000 | 22.671082000 | C             | 23.344901000 | 23.813162000 | 14.664640000 |
| C  | 20.687003000 | 26.880900000 | 20.687003000 | C             | 22.929888000 | 25.259677000 | 14.478680000 |
| C  | 21.360638000 | 27.201858000 | 22.988008000 | H             | 21.840351000 | 25.357170000 | 14.474205000 |
| C  | 20.384593000 | 27.216911000 | 22.003898000 | H             | 25.115522000 | 22.744057000 | 15.295386000 |
| H  | 21.176773000 | 27.364756000 | 23.999268000 | H             | 25.396517000 | 27.781521000 | 14.712391000 |
| H  | 19.491341000 | 27.477656000 | 22.313835000 | H             | 23.058035000 | 29.433954000 | 15.778243000 |
| O  | 13.440450000 | 28.827615000 | 16.986310000 | H             | 23.301018000 | 25.667067000 | 13.525939000 |
| C  | 13.440450000 | 30.034298000 | 16.593848000 | H             | 25.378367000 | 23.788719000 | 13.884892000 |
| O  | 13.440450000 | 28.827615000 | 9.894590000  | H             | 25.040576000 | 28.766850000 | 17.587407000 |
| C  | 13.440450000 | 30.034298000 | 10.287052000 | H             | 26.544557000 | 28.214578000 | 16.885575000 |
| O  | 13.440450000 | 30.426760000 | 15.387165000 | H             | 23.031016000 | 23.226953000 | 13.799275000 |
| O  | 13.440450000 | 30.426760000 | 11.493735000 | H             | 22.853410000 | 23.409889000 | 15.557232000 |
| C  | 17.333342000 | 27.201858000 | 18.960712000 | H             | 26.010856000 | 26.137028000 | 17.667515000 |
| C  | 18.317452000 | 27.216911000 | 19.936757000 | H             | 24.388621000 | 26.587845000 | 18.064008000 |
| H  | 16.322082000 | 27.364756000 | 19.144577000 | H             | 22.763544000 | 27.421410000 | 17.015317000 |
| H  | 18.007515000 | 27.477656000 | 20.830009000 | H             | 21.731586000 | 27.240251000 | 15.610033000 |
| H  | 13.440450000 | 30.790903000 | 9.530447000  | C             | 28.767952000 | 26.484069000 | 17.109771000 |
| H  | 17.350453000 | 26.880900000 | 9.530447000  | O             | 28.741595000 | 25.262428000 | 16.535831000 |
| H  | 17.350453000 | 30.790903000 | 13.440450000 | O             | 29.106360000 | 27.500115000 | 16.565490000 |
| H  | 13.440450000 | 30.790903000 | 17.350453000 | <b>i. TS3</b> |              |              |              |
| H  | 9.530447000  | 30.790903000 | 13.440450000 | N             | 26.970328000 | 21.843053000 | 20.419471000 |
| H  | 9.530447000  | 26.880900000 | 17.350453000 | N             | 26.667235000 | 19.941622000 | 18.454273000 |
| H  | 13.440450000 | 22.970897000 | 9.530447000  | C             | 26.662399000 | 20.576552000 | 20.800635000 |
| H  | 9.530447000  | 22.970897000 | 13.440450000 | C             | 26.972518000 | 22.826936000 | 21.345653000 |
| H  | 13.440450000 | 22.970897000 | 17.350453000 | C             | 26.720078000 | 19.013219000 | 17.481992000 |
| H  | 15.026933000 | 25.294417000 | 11.853967000 | C             | 26.682035000 | 19.531578000 | 19.751290000 |
| H  | 11.853967000 | 28.467383000 | 11.853967000 | C             | 26.340925000 | 20.305112000 | 22.141974000 |
| H  | 9.530447000  | 26.880900000 | 9.530447000  | C             | 26.712010000 | 22.627882000 | 22.702674000 |
| H  | 15.026933000 | 28.467383000 | 15.026933000 | C             | 26.732342000 | 17.625874000 | 17.695415000 |
| H  | 11.853967000 | 25.294417000 | 15.026933000 | C             | 26.729524000 | 18.160789000 | 20.055433000 |
| H  | 26.602859000 | 23.840851000 | 20.927908000 | C             | 26.382525000 | 21.316160000 | 23.088697000 |
| H  | 26.486238000 | 19.401934000 | 16.482726000 | C             | 26.736115000 | 17.217021000 | 19.040457000 |
| H  | 26.596206000 | 19.226697000 | 22.539461000 | C             | 26.809925000 | 23.730886000 | 23.728973000 |
| H  | 26.974956000 | 17.813460000 | 21.079809000 | C             | 26.809925000 | 16.592377000 | 16.590464000 |
| H  | 26.692856000 | 21.060537000 | 24.192813000 | O             | 26.880885000 | 24.934153000 | 23.334955000 |
| H  | 26.975676000 | 16.155480000 | 19.248589000 | O             | 26.880903000 | 23.334945000 | 24.934136000 |
| Cu | 26.554366000 | 22.120403000 | 18.321509000 | O             | 26.880903000 | 15.387214000 | 16.986405000 |
| I  | 23.951480000 | 23.206995000 | 18.631943000 | O             | 26.880885000 | 16.986395000 | 15.387197000 |
| C  | 28.087108000 | 24.338705000 | 17.414018000 | Zr            | 26.878142000 | 26.881612000 | 24.237883000 |
| C  | 27.619220000 | 23.138183000 | 17.067031000 | Zr            | 26.878209000 | 24.239690000 | 26.880717000 |
| H  | 27.847999000 | 22.861498000 | 16.029558000 | Zr            | 26.878209000 | 13.440633000 | 16.081660000 |
| C  | 28.018962000 | 25.057880000 | 18.723171000 | Zr            | 26.878142000 | 16.083467000 | 13.439738000 |
| H  | 28.756343000 | 24.709235000 | 19.458981000 | O             | 24.934203000 | 26.880849000 | 23.334882000 |
| H  | 27.020836000 | 25.005404000 | 19.181054000 | O             | 25.848911000 | 25.848918000 | 25.848917000 |
| O  | 28.318909000 | 26.425733000 | 18.390838000 | O             | 25.849015000 | 27.912768000 | 25.849028000 |
| H  | 26.108734000 | 24.456893000 | 16.349187000 | O             | 27.912782000 | 25.849032000 | 25.849031000 |

|    |              |              |              |   |              |              |              |
|----|--------------|--------------|--------------|---|--------------|--------------|--------------|
| O  | 27.912889000 | 27.912886000 | 25.848919000 | O | 28.827598000 | 26.880862000 | 30.426940000 |
| O  | 26.880945000 | 28.827581000 | 23.334856000 | O | 25.848909000 | 12.408453000 | 12.408455000 |
| O  | 28.827591000 | 26.880922000 | 23.334870000 | O | 23.334862000 | 11.493756000 | 13.440411000 |
| O  | 24.934197000 | 23.334881000 | 26.880846000 | O | 23.334855000 | 15.387135000 | 13.440484000 |
| O  | 25.849012000 | 25.849025000 | 27.912771000 | O | 23.334864000 | 13.440413000 | 11.493754000 |
| O  | 27.912892000 | 25.848913000 | 27.912887000 | O | 23.334856000 | 13.440488000 | 15.387138000 |
| O  | 26.880944000 | 23.334850000 | 28.827576000 | O | 24.934211000 | 9.894408000  | 13.440426000 |
| O  | 28.827591000 | 23.334868000 | 26.880917000 | O | 26.880889000 | 9.894413000  | 15.387149000 |
| O  | 25.849012000 | 12.408579000 | 14.472325000 | O | 27.912786000 | 12.408573000 | 12.408574000 |
| O  | 25.848911000 | 14.472433000 | 14.472432000 | O | 26.880878000 | 9.894407000  | 11.493761000 |
| O  | 24.934197000 | 13.440504000 | 16.986469000 | O | 28.827598000 | 9.894410000  | 13.440488000 |
| O  | 26.880944000 | 11.493774000 | 16.986500000 | O | 30.426944000 | 11.493755000 | 13.440484000 |
| O  | 27.912892000 | 12.408463000 | 14.472437000 | O | 30.426936000 | 15.387151000 | 13.440421000 |
| O  | 27.912782000 | 14.472319000 | 14.472318000 | O | 30.426946000 | 13.440483000 | 11.493756000 |
| O  | 28.827591000 | 13.440433000 | 16.986482000 | O | 30.426933000 | 13.440426000 | 15.387152000 |
| O  | 25.849015000 | 14.472322000 | 12.408582000 | O | 24.934210000 | 13.440425000 | 9.894409000  |
| O  | 24.934203000 | 16.986468000 | 13.440501000 | O | 26.880879000 | 11.493760000 | 9.894408000  |
| O  | 27.912889000 | 14.472431000 | 12.408464000 | O | 26.880889000 | 15.387147000 | 9.894411000  |
| O  | 26.880945000 | 16.986494000 | 11.493769000 | O | 28.827596000 | 13.440487000 | 9.894406000  |
| O  | 28.827591000 | 16.986480000 | 13.440428000 | C | 23.753697000 | 27.066116000 | 30.007949000 |
| C  | 23.755332000 | 26.686089000 | 23.755213000 | C | 23.753135000 | 30.008630000 | 27.063604000 |
| Zr | 24.236612000 | 26.881475000 | 26.880552000 | C | 26.696398000 | 30.008246000 | 30.008106000 |
| Zr | 26.880671000 | 29.524609000 | 26.880680000 | C | 30.007968000 | 30.008237000 | 26.695581000 |
| Zr | 29.524440000 | 26.882357000 | 26.881381000 | C | 30.008286000 | 26.697416000 | 30.008420000 |
| C  | 27.064326000 | 30.008530000 | 23.753165000 | C | 23.753697000 | 10.313401000 | 13.255234000 |
| C  | 30.008123000 | 27.066993000 | 23.753823000 | C | 23.753135000 | 13.257746000 | 10.312720000 |
| C  | 23.755714000 | 23.756676000 | 26.684338000 | C | 26.696398000 | 10.313244000 | 10.313104000 |
| Zr | 26.880615000 | 26.881402000 | 29.524137000 | C | 30.008286000 | 10.312930000 | 13.623934000 |
| C  | 27.065914000 | 23.754135000 | 30.008060000 | C | 30.007968000 | 13.625768000 | 10.313113000 |
| C  | 30.007964000 | 23.754748000 | 27.067567000 | H | 27.351814000 | 30.759513000 | 23.002127000 |
| Zr | 24.236612000 | 13.440798000 | 13.439875000 | H | 30.758179000 | 27.358190000 | 23.003211000 |
| Zr | 26.880615000 | 10.797213000 | 13.439948000 | H | 23.008991000 | 23.009158000 | 26.377462000 |
| C  | 23.755714000 | 13.637012000 | 16.564674000 | H | 27.355985000 | 23.003402000 | 30.758391000 |
| C  | 27.065914000 | 10.313290000 | 16.567215000 | H | 30.757581000 | 23.004153000 | 27.359935000 |
| Zr | 29.524440000 | 13.439969000 | 13.438993000 | H | 23.008991000 | 13.943888000 | 17.312192000 |
| C  | 30.007964000 | 13.253783000 | 16.566602000 | H | 27.355985000 | 9.562959000  | 17.317948000 |
| Zr | 26.880671000 | 13.440670000 | 10.796741000 | H | 30.757582000 | 12.961415000 | 17.317197000 |
| C  | 23.755332000 | 16.566137000 | 13.635261000 | H | 27.351814000 | 17.319223000 | 9.561837000  |
| C  | 27.064326000 | 16.568185000 | 10.312820000 | H | 30.758179000 | 17.318139000 | 12.963160000 |
| C  | 30.008123000 | 16.567527000 | 13.254357000 | H | 23.003255000 | 27.356162000 | 30.758555000 |
| O  | 23.334855000 | 26.880866000 | 24.934215000 | H | 23.001913000 | 30.759916000 | 27.349810000 |
| O  | 23.334856000 | 24.934212000 | 26.880862000 | H | 26.407446000 | 30.758917000 | 30.758911000 |
| O  | 25.848909000 | 27.912895000 | 27.912897000 | H | 30.758582000 | 30.758568000 | 26.405278000 |
| O  | 23.334862000 | 26.880939000 | 28.827594000 | H | 30.759373000 | 26.409850000 | 30.759355000 |
| O  | 23.334864000 | 28.827596000 | 26.880937000 | H | 23.003255000 | 9.562795000  | 12.965188000 |
| O  | 24.934210000 | 30.426941000 | 26.880925000 | H | 23.001913000 | 12.971540000 | 9.561434000  |
| O  | 26.880889000 | 30.426939000 | 24.934203000 | H | 26.407446000 | 9.562439000  | 9.562434000  |
| O  | 26.880879000 | 30.426942000 | 28.827590000 | H | 30.759373000 | 9.561995000  | 13.911500000 |
| O  | 27.912786000 | 27.912776000 | 27.912777000 | H | 30.758582000 | 13.916071000 | 9.562782000  |
| O  | 28.827596000 | 30.426944000 | 26.880863000 | H | 25.215026000 | 11.776433000 | 15.102845000 |
| O  | 30.426933000 | 24.934198000 | 26.880924000 | H | 28.544134000 | 11.776251000 | 11.775822000 |
| O  | 30.426936000 | 26.880929000 | 24.934199000 | H | 28.555271000 | 15.099035000 | 15.098322000 |
| O  | 30.426944000 | 26.880866000 | 28.827595000 | H | 25.215244000 | 15.103495000 | 11.776660000 |
| O  | 30.426946000 | 28.827594000 | 26.880867000 | H | 25.215244000 | 28.544690000 | 25.217855000 |
| O  | 24.934211000 | 26.880924000 | 30.426942000 | H | 28.555271000 | 25.223028000 | 25.222315000 |
| O  | 26.880889000 | 24.934201000 | 30.426937000 | H | 28.544134000 | 28.545528000 | 28.545099000 |
| O  | 26.880878000 | 28.827589000 | 30.426943000 | H | 25.215026000 | 25.218505000 | 28.544917000 |

## ARTICLE

## Journal Name

|    |              |              |              |    |              |              |              |
|----|--------------|--------------|--------------|----|--------------|--------------|--------------|
| O  | 14.472677000 | 25.848673000 | 14.472677000 | O  | 9.894590000  | 26.880900000 | 15.387165000 |
| O  | 12.408223000 | 25.848673000 | 12.408223000 | C  | 10.287052000 | 26.880900000 | 16.593848000 |
| O  | 14.472677000 | 25.848673000 | 12.408223000 | Zr | 13.440450000 | 26.880900000 | 15.923976000 |
| O  | 12.408223000 | 25.848673000 | 14.472677000 | O  | 11.493735000 | 26.880900000 | 16.986310000 |
| Zr | 13.440450000 | 24.397374000 | 13.440450000 | O  | 14.472677000 | 27.913127000 | 14.472677000 |
| O  | 11.493735000 | 23.335040000 | 13.440450000 | Zr | 13.440450000 | 26.880900000 | 10.956924000 |
| C  | 10.287052000 | 23.727502000 | 13.440450000 | O  | 11.493735000 | 26.880900000 | 9.894590000  |
| O  | 15.387165000 | 23.335040000 | 13.440450000 | O  | 15.387165000 | 26.880900000 | 9.894590000  |
| C  | 16.593848000 | 23.727502000 | 13.440450000 | O  | 12.408223000 | 27.913127000 | 12.408223000 |
| C  | 17.650268000 | 22.671082000 | 13.440450000 | O  | 15.387165000 | 26.880900000 | 16.986310000 |
| C  | 19.634347000 | 20.687003000 | 13.440450000 | Zr | 13.440450000 | 29.364426000 | 13.440450000 |
| C  | 18.960712000 | 22.988008000 | 13.761408000 | O  | 11.493735000 | 30.426760000 | 13.440450000 |
| C  | 19.936757000 | 22.003898000 | 13.776461000 | C  | 10.287052000 | 30.034298000 | 13.440450000 |
| H  | 19.144577000 | 23.999268000 | 13.924306000 | O  | 15.387165000 | 30.426760000 | 13.440450000 |
| H  | 20.830009000 | 22.313835000 | 14.037206000 | C  | 16.593848000 | 30.034298000 | 13.440450000 |
| O  | 9.894590000  | 24.934185000 | 13.440450000 | O  | 16.986310000 | 28.827615000 | 13.440450000 |
| O  | 16.986310000 | 24.934185000 | 13.440450000 | O  | 9.894590000  | 28.827615000 | 13.440450000 |
| C  | 17.333342000 | 21.360638000 | 13.119492000 | C  | 22.671082000 | 26.880900000 | 22.671082000 |
| C  | 18.317452000 | 20.384593000 | 13.104439000 | C  | 20.687003000 | 26.880900000 | 20.687003000 |
| H  | 16.322082000 | 21.176773000 | 12.956594000 | C  | 21.360638000 | 27.201858000 | 22.988008000 |
| H  | 18.007515000 | 19.491341000 | 12.843694000 | C  | 20.384593000 | 27.216911000 | 22.003898000 |
| C  | 22.988008000 | 26.559942000 | 21.360638000 | H  | 21.176773000 | 27.364756000 | 23.999268000 |
| C  | 22.003898000 | 26.544889000 | 20.384593000 | H  | 19.491341000 | 27.477656000 | 22.313835000 |
| H  | 23.999268000 | 26.397044000 | 21.176773000 | O  | 13.440450000 | 28.827615000 | 16.986310000 |
| H  | 22.313835000 | 26.284144000 | 19.491341000 | C  | 13.440450000 | 30.034298000 | 16.593848000 |
| C  | 22.671082000 | 17.650268000 | 13.440450000 | O  | 13.440450000 | 28.827615000 | 9.894590000  |
| C  | 20.687003000 | 19.634347000 | 13.440450000 | C  | 13.440450000 | 30.034298000 | 10.287052000 |
| O  | 13.440450000 | 24.934185000 | 9.894590000  | O  | 13.440450000 | 30.426760000 | 15.387165000 |
| C  | 13.440450000 | 23.727502000 | 10.287052000 | O  | 13.440450000 | 30.426760000 | 11.493735000 |
| O  | 13.440450000 | 24.934185000 | 16.986310000 | C  | 17.333342000 | 27.201858000 | 18.960712000 |
| C  | 13.440450000 | 23.727502000 | 16.593848000 | C  | 18.317452000 | 27.216911000 | 19.936757000 |
| O  | 13.440450000 | 23.335040000 | 15.387165000 | H  | 16.322082000 | 27.364756000 | 19.144577000 |
| O  | 13.440450000 | 23.335040000 | 11.493735000 | H  | 18.007515000 | 27.477656000 | 20.830009000 |
| C  | 18.960712000 | 26.559942000 | 17.333342000 | H  | 13.440450000 | 30.790903000 | 9.530447000  |
| C  | 19.936757000 | 26.544889000 | 18.317452000 | H  | 17.350453000 | 26.880900000 | 9.530447000  |
| H  | 19.144577000 | 26.397044000 | 16.322082000 | H  | 17.350453000 | 30.790903000 | 13.440450000 |
| H  | 20.830009000 | 26.284144000 | 18.007515000 | H  | 13.440450000 | 30.790903000 | 17.350453000 |
| C  | 21.360638000 | 17.333342000 | 13.119492000 | H  | 9.530447000  | 30.790903000 | 13.440450000 |
| C  | 20.384593000 | 18.317452000 | 13.104439000 | H  | 9.530447000  | 26.880900000 | 17.350453000 |
| H  | 21.176773000 | 16.322082000 | 12.956594000 | H  | 13.440450000 | 22.970897000 | 9.530447000  |
| H  | 19.491341000 | 18.007515000 | 12.843694000 | H  | 9.530447000  | 22.970897000 | 13.440450000 |
| C  | 22.988008000 | 18.960712000 | 13.761408000 | H  | 13.440450000 | 22.970897000 | 17.350453000 |
| C  | 22.003898000 | 19.936757000 | 13.776461000 | H  | 15.026933000 | 25.294417000 | 11.853967000 |
| H  | 23.999268000 | 19.144577000 | 13.924306000 | H  | 11.853967000 | 28.467383000 | 11.853967000 |
| H  | 22.313835000 | 20.830009000 | 14.037206000 | H  | 9.530447000  | 26.880900000 | 9.530447000  |
| Zr | 10.956924000 | 26.880900000 | 13.440450000 | H  | 15.026933000 | 28.467383000 | 15.026933000 |
| O  | 9.894590000  | 26.880900000 | 11.493735000 | H  | 11.853967000 | 25.294417000 | 15.026933000 |
| O  | 12.408223000 | 27.913127000 | 14.472677000 | H  | 27.196851000 | 23.823774000 | 20.978195000 |
| C  | 10.287052000 | 26.880900000 | 10.287052000 | H  | 26.755225000 | 19.393869000 | 16.462693000 |
| Zr | 15.923976000 | 26.880900000 | 13.440450000 | H  | 26.040540000 | 19.304835000 | 22.437926000 |
| O  | 16.986310000 | 26.880900000 | 11.493735000 | H  | 26.784431000 | 17.834276000 | 21.089280000 |
| C  | 16.593848000 | 26.880900000 | 10.287052000 | H  | 26.152879000 | 21.112757000 | 24.129992000 |
| O  | 16.986310000 | 26.880900000 | 15.387165000 | H  | 26.772503000 | 16.156580000 | 19.268328000 |
| O  | 14.472677000 | 27.913127000 | 12.408223000 | Cu | 26.837893000 | 22.239079000 | 18.401343000 |
| C  | 16.593848000 | 26.880900000 | 16.593848000 | I  | 24.817433000 | 24.130128000 | 19.072183000 |
| C  | 17.650268000 | 26.880900000 | 17.650268000 | C  | 28.568791000 | 23.904714000 | 16.989562000 |
| C  | 19.634347000 | 26.880900000 | 19.634347000 | C  | 27.830176000 | 22.803679000 | 16.750191000 |

| Journal Name     |              |              |              | ARTICLE |              |              |              |
|------------------|--------------|--------------|--------------|---------|--------------|--------------|--------------|
| H                | 28.379824000 | 22.061509000 | 16.159628000 | Zr      | 26.878209000 | 13.440633000 | 16.081660000 |
| C                | 28.242937000 | 25.159156000 | 17.749467000 | Zr      | 26.878142000 | 16.083467000 | 13.439738000 |
| H                | 28.123849000 | 24.993095000 | 18.826655000 | O       | 24.934203000 | 26.880849000 | 23.334882000 |
| H                | 27.335839000 | 25.664099000 | 17.401445000 | O       | 25.848911000 | 25.848918000 | 25.848917000 |
| O                | 29.378605000 | 26.006157000 | 17.532921000 | O       | 25.849015000 | 27.912768000 | 25.849028000 |
| H                | 26.553033000 | 23.008699000 | 16.124254000 | O       | 27.912782000 | 25.849032000 | 25.849031000 |
| C                | 23.105265000 | 25.446982000 | 13.772805000 | O       | 27.912889000 | 27.912886000 | 25.848919000 |
| C                | 24.520529000 | 25.853044000 | 14.172945000 | O       | 26.880945000 | 28.827581000 | 23.334856000 |
| C                | 24.949988000 | 25.285673000 | 15.533895000 | O       | 28.827591000 | 26.880922000 | 23.334870000 |
| C                | 22.079711000 | 25.584595000 | 14.892140000 | O       | 24.934197000 | 23.334881000 | 26.880846000 |
| C                | 24.551053000 | 23.852707000 | 15.688518000 | O       | 25.849012000 | 25.849025000 | 27.912771000 |
| C                | 22.296326000 | 24.652463000 | 16.100830000 | O       | 27.912892000 | 25.848913000 | 27.912887000 |
| N                | 23.243180000 | 23.556076000 | 15.878495000 | O       | 26.880944000 | 23.334850000 | 28.827576000 |
| H                | 22.782353000 | 26.045620000 | 12.914835000 | O       | 28.827591000 | 23.334868000 | 26.880917000 |
| H                | 21.086442000 | 25.400568000 | 14.472292000 | O       | 25.849012000 | 12.408579000 | 14.472325000 |
| C                | 24.996413000 | 21.554560000 | 15.484740000 | O       | 25.848911000 | 14.472433000 | 14.472432000 |
| N                | 25.462203000 | 22.923995000 | 15.508347000 | O       | 24.934197000 | 13.440504000 | 16.986469000 |
| C                | 23.994463000 | 21.287672000 | 16.596349000 | O       | 26.880944000 | 11.493774000 | 16.986500000 |
| C                | 22.865108000 | 22.302410000 | 16.555665000 | O       | 27.912892000 | 12.408463000 | 14.472437000 |
| H                | 22.581197000 | 22.572695000 | 17.582164000 | O       | 27.912782000 | 14.472319000 | 14.472318000 |
| H                | 25.873160000 | 20.906338000 | 15.576339000 | O       | 28.827591000 | 13.440433000 | 16.986482000 |
| H                | 23.108747000 | 24.405672000 | 13.426810000 | O       | 25.849015000 | 14.472322000 | 12.408582000 |
| H                | 22.062535000 | 26.620524000 | 15.252107000 | O       | 24.934203000 | 16.986468000 | 13.440501000 |
| H                | 21.967510000 | 21.914324000 | 16.064600000 | O       | 27.912889000 | 14.472431000 | 12.408464000 |
| H                | 24.562134000 | 21.369391000 | 14.495242000 | O       | 26.880945000 | 16.986494000 | 11.493769000 |
| H                | 24.601749000 | 26.944946000 | 14.219543000 | O       | 28.827591000 | 16.986480000 | 13.440428000 |
| H                | 25.224275000 | 25.520544000 | 13.402064000 | C       | 23.755332000 | 26.686089000 | 23.755213000 |
| H                | 23.596418000 | 20.269690000 | 16.535076000 | Zr      | 24.236612000 | 26.881475000 | 26.880552000 |
| H                | 24.522132000 | 21.374506000 | 17.553862000 | Zr      | 26.880671000 | 29.524609000 | 26.880680000 |
| H                | 26.036885000 | 25.340044000 | 15.637951000 | Zr      | 29.524440000 | 26.882357000 | 26.881381000 |
| H                | 24.519902000 | 25.870921000 | 16.353517000 | C       | 27.064326000 | 30.008530000 | 23.753165000 |
| H                | 22.630576000 | 25.202773000 | 16.991515000 | C       | 30.008123000 | 27.066993000 | 23.753823000 |
| H                | 21.350101000 | 24.178659000 | 16.374918000 | C       | 23.755714000 | 23.756676000 | 26.684338000 |
| C                | 30.323492000 | 25.332921000 | 16.847645000 | Zr      | 26.880615000 | 26.881402000 | 29.524137000 |
| O                | 29.867380000 | 24.077233000 | 16.530541000 | C       | 27.065914000 | 23.754135000 | 30.008060000 |
| O                | 31.399964000 | 25.753531000 | 16.546675000 | C       | 30.007964000 | 23.754748000 | 27.067567000 |
| <b>j. PC/DBU</b> |              |              |              | Zr      | 24.236612000 | 13.440798000 | 13.439875000 |
| N                | 26.614526000 | 21.852629000 | 20.408920000 | Zr      | 26.880615000 | 10.797213000 | 13.439948000 |
| N                | 26.468302000 | 19.903019000 | 18.478376000 | C       | 23.755714000 | 13.637012000 | 16.564674000 |
| C                | 26.652148000 | 20.557815000 | 20.811656000 | C       | 27.065914000 | 10.313290000 | 16.567215000 |
| C                | 26.622686000 | 22.838466000 | 21.324899000 | Zr      | 29.524440000 | 13.439969000 | 13.438993000 |
| C                | 26.505453000 | 18.996019000 | 17.491960000 | C       | 30.007964000 | 13.253783000 | 16.566602000 |
| C                | 26.663834000 | 19.504830000 | 19.755158000 | Zr      | 26.880671000 | 13.440670000 | 10.796741000 |
| C                | 26.699563000 | 20.260402000 | 22.180272000 | C       | 23.755332000 | 16.566137000 | 13.635261000 |
| C                | 26.705586000 | 22.622100000 | 22.704834000 | C       | 27.064326000 | 16.568185000 | 10.312820000 |
| C                | 26.720123000 | 17.622698000 | 17.695417000 | C       | 30.008123000 | 16.567527000 | 13.254357000 |
| C                | 26.893419000 | 18.154525000 | 20.049138000 | O       | 23.334855000 | 26.880866000 | 24.934215000 |
| C                | 26.738970000 | 21.282578000 | 23.117500000 | O       | 23.334856000 | 24.934212000 | 26.880862000 |
| C                | 26.911916000 | 17.220231000 | 19.023945000 | O       | 25.848909000 | 27.912895000 | 27.912897000 |
| C                | 26.809925000 | 23.730886000 | 23.728973000 | O       | 23.334862000 | 26.880939000 | 28.827594000 |
| C                | 26.809925000 | 16.592377000 | 16.590464000 | O       | 23.334864000 | 28.827596000 | 26.880937000 |
| O                | 26.880885000 | 24.934153000 | 23.334955000 | O       | 24.934210000 | 30.426941000 | 26.880925000 |
| O                | 26.880903000 | 23.334945000 | 24.934136000 | O       | 26.880889000 | 30.426939000 | 24.934203000 |
| O                | 26.880903000 | 15.387214000 | 16.986405000 | O       | 26.880879000 | 30.426942000 | 28.827590000 |
| O                | 26.880885000 | 16.986395000 | 15.387197000 | O       | 27.912786000 | 27.912776000 | 27.912777000 |
| Zr               | 26.878142000 | 26.881612000 | 24.237883000 | O       | 28.827596000 | 30.426944000 | 26.880863000 |
| Zr               | 26.878209000 | 24.239690000 | 26.880717000 | O       | 30.426933000 | 24.934198000 | 26.880924000 |

## ARTICLE

## Journal Name

|   |              |              |              |    |              |              |              |
|---|--------------|--------------|--------------|----|--------------|--------------|--------------|
| O | 30.426936000 | 26.880929000 | 24.934199000 | H  | 28.555271000 | 15.099035000 | 15.098322000 |
| O | 30.426944000 | 26.880866000 | 28.827595000 | H  | 25.215244000 | 15.103495000 | 11.776660000 |
| O | 30.426946000 | 28.827594000 | 26.880867000 | H  | 25.215244000 | 28.544690000 | 25.217855000 |
| O | 24.934211000 | 26.880924000 | 30.426942000 | H  | 28.555271000 | 25.223028000 | 25.222315000 |
| O | 26.880889000 | 24.934201000 | 30.426937000 | H  | 28.544134000 | 28.545528000 | 28.545099000 |
| O | 26.880878000 | 28.827589000 | 30.426943000 | H  | 25.215026000 | 25.218505000 | 28.544917000 |
| O | 28.827598000 | 26.880862000 | 30.426940000 | O  | 14.472677000 | 25.848673000 | 14.472677000 |
| O | 25.848909000 | 12.408453000 | 12.408455000 | O  | 12.408223000 | 25.848673000 | 12.408223000 |
| O | 23.334862000 | 11.493756000 | 13.440411000 | O  | 14.472677000 | 25.848673000 | 12.408223000 |
| O | 23.334855000 | 15.387135000 | 13.440484000 | O  | 12.408223000 | 25.848673000 | 14.472677000 |
| O | 23.334864000 | 13.440413000 | 11.493754000 | Zr | 13.440450000 | 24.397374000 | 13.440450000 |
| O | 23.334856000 | 13.440488000 | 15.387138000 | O  | 11.493735000 | 23.335040000 | 13.440450000 |
| O | 24.934211000 | 9.894408000  | 13.440426000 | C  | 10.287052000 | 23.727502000 | 13.440450000 |
| O | 26.880889000 | 9.894413000  | 15.387149000 | O  | 15.387165000 | 23.335040000 | 13.440450000 |
| O | 27.912786000 | 12.408573000 | 12.408574000 | C  | 16.593848000 | 23.727502000 | 13.440450000 |
| O | 26.880878000 | 9.894407000  | 11.493761000 | C  | 17.650268000 | 22.671082000 | 13.440450000 |
| O | 28.827598000 | 9.894410000  | 13.440488000 | C  | 19.634347000 | 20.687003000 | 13.440450000 |
| O | 30.426944000 | 11.493755000 | 13.440484000 | C  | 18.960712000 | 22.988008000 | 13.761408000 |
| O | 30.426936000 | 15.387151000 | 13.440421000 | C  | 19.936757000 | 22.003898000 | 13.776461000 |
| O | 30.426946000 | 13.440483000 | 11.493756000 | H  | 19.144577000 | 23.999268000 | 13.924306000 |
| O | 30.426933000 | 13.440426000 | 15.387152000 | H  | 20.830009000 | 22.313835000 | 14.037206000 |
| O | 24.934210000 | 13.440425000 | 9.894409000  | O  | 9.894590000  | 24.934185000 | 13.440450000 |
| O | 26.880879000 | 11.493760000 | 9.894408000  | O  | 16.986310000 | 24.934185000 | 13.440450000 |
| O | 26.880889000 | 15.387147000 | 9.894411000  | C  | 17.333342000 | 21.360638000 | 13.119492000 |
| O | 28.827596000 | 13.440487000 | 9.894406000  | C  | 18.317452000 | 20.384593000 | 13.104439000 |
| C | 23.753697000 | 27.066116000 | 30.007949000 | H  | 16.322082000 | 21.176773000 | 12.956594000 |
| C | 23.753135000 | 30.008630000 | 27.063604000 | H  | 18.007515000 | 19.491341000 | 12.843694000 |
| C | 26.696398000 | 30.008246000 | 30.008106000 | C  | 22.988008000 | 26.559942000 | 21.360638000 |
| C | 30.007968000 | 30.008237000 | 26.695581000 | C  | 22.003898000 | 26.544889000 | 20.384593000 |
| C | 30.008286000 | 26.697416000 | 30.008420000 | H  | 23.999268000 | 26.397044000 | 21.176773000 |
| C | 23.753697000 | 10.313401000 | 13.255234000 | H  | 22.313835000 | 26.284144000 | 19.491341000 |
| C | 23.753135000 | 13.257746000 | 10.312720000 | C  | 22.671082000 | 17.650268000 | 13.440450000 |
| C | 26.696398000 | 10.313244000 | 10.313104000 | C  | 20.687003000 | 19.634347000 | 13.440450000 |
| C | 30.008286000 | 10.312930000 | 13.623934000 | O  | 13.440450000 | 24.934185000 | 9.894590000  |
| C | 30.007968000 | 13.625768000 | 10.313113000 | C  | 13.440450000 | 23.727502000 | 10.287052000 |
| H | 27.351814000 | 30.759513000 | 23.002127000 | O  | 13.440450000 | 24.934185000 | 16.986310000 |
| H | 30.758179000 | 27.358190000 | 23.003211000 | C  | 13.440450000 | 23.727502000 | 16.593848000 |
| H | 23.008991000 | 23.009158000 | 26.377462000 | O  | 13.440450000 | 23.335040000 | 15.387165000 |
| H | 27.355985000 | 23.003402000 | 30.758391000 | O  | 13.440450000 | 23.335040000 | 11.493735000 |
| H | 30.757581000 | 23.004153000 | 27.359935000 | C  | 18.960712000 | 26.559942000 | 17.333342000 |
| H | 23.008991000 | 13.943888000 | 17.312192000 | C  | 19.936757000 | 26.544889000 | 18.317452000 |
| H | 27.355985000 | 9.562959000  | 17.317948000 | H  | 19.144577000 | 26.397044000 | 16.322082000 |
| H | 30.757582000 | 12.961415000 | 17.317197000 | H  | 20.830009000 | 26.284144000 | 18.007515000 |
| H | 27.351814000 | 17.319223000 | 9.561837000  | C  | 21.360638000 | 17.333342000 | 13.119492000 |
| H | 30.758179000 | 17.318139000 | 12.963160000 | C  | 20.384593000 | 18.317452000 | 13.104439000 |
| H | 23.003255000 | 27.356162000 | 30.758555000 | H  | 21.176773000 | 16.322082000 | 12.956594000 |
| H | 23.001913000 | 30.759916000 | 27.349810000 | H  | 19.491341000 | 18.007515000 | 12.843694000 |
| H | 26.407446000 | 30.758917000 | 30.758911000 | C  | 22.988008000 | 18.960712000 | 13.761408000 |
| H | 30.758582000 | 30.758568000 | 26.405278000 | C  | 22.003898000 | 19.936757000 | 13.776461000 |
| H | 30.759373000 | 26.409850000 | 30.759355000 | H  | 23.999268000 | 19.144577000 | 13.924306000 |
| H | 23.003255000 | 9.562795000  | 12.965188000 | H  | 22.313835000 | 20.830009000 | 14.037206000 |
| H | 23.001913000 | 12.971540000 | 9.561434000  | Zr | 10.956924000 | 26.880900000 | 13.440450000 |
| H | 26.407446000 | 9.562439000  | 9.562434000  | O  | 9.894590000  | 26.880900000 | 11.493735000 |
| H | 30.759373000 | 9.561995000  | 13.911500000 | O  | 12.408223000 | 27.913127000 | 14.472677000 |
| H | 30.758582000 | 13.916071000 | 9.562782000  | C  | 10.287052000 | 26.880900000 | 10.287052000 |
| H | 25.215026000 | 11.776433000 | 15.102845000 | Zr | 15.923976000 | 26.880900000 | 13.440450000 |
| H | 28.544134000 | 11.776251000 | 11.775822000 | O  | 16.986310000 | 26.880900000 | 11.493735000 |

| Journal Name |              |              |              | ARTICLE      |              |              |              |
|--------------|--------------|--------------|--------------|--------------|--------------|--------------|--------------|
| C            | 16.593848000 | 26.880900000 | 10.287052000 | H            | 26.800133000 | 21.059499000 | 24.177555000 |
| O            | 16.986310000 | 26.880900000 | 15.387165000 | H            | 27.095927000 | 16.171706000 | 19.233862000 |
| O            | 14.472677000 | 27.913127000 | 12.408223000 | Cu           | 26.708097000 | 22.183752000 | 18.354436000 |
| C            | 16.593848000 | 26.880900000 | 16.593848000 | I            | 24.611516000 | 23.426157000 | 17.541170000 |
| C            | 17.650268000 | 26.880900000 | 17.650268000 | C            | 28.854494000 | 22.112366000 | 18.272510000 |
| C            | 19.634347000 | 26.880900000 | 19.634347000 | C            | 28.285666000 | 22.341464000 | 17.046311000 |
| O            | 9.894590000  | 26.880900000 | 15.387165000 | H            | 28.183760000 | 21.530941000 | 16.331816000 |
| C            | 10.287052000 | 26.880900000 | 16.593848000 | C            | 29.447085000 | 23.059961000 | 19.270988000 |
| Zr           | 13.440450000 | 26.880900000 | 15.923976000 | H            | 28.761886000 | 23.833900000 | 19.619926000 |
| O            | 11.493735000 | 26.880900000 | 16.986310000 | H            | 30.351444000 | 23.558083000 | 18.901157000 |
| O            | 14.472677000 | 27.913127000 | 14.472677000 | O            | 29.804003000 | 22.189163000 | 20.360877000 |
| Zr           | 13.440450000 | 26.880900000 | 10.956924000 | H            | 28.223013000 | 23.362721000 | 16.690948000 |
| O            | 11.493735000 | 26.880900000 | 9.894590000  | C            | 26.619197000 | 28.647691000 | 19.601653000 |
| O            | 15.387165000 | 26.880900000 | 9.894590000  | C            | 26.948408000 | 27.425197000 | 20.451127000 |
| O            | 12.408223000 | 27.913127000 | 12.408223000 | C            | 26.983411000 | 26.083002000 | 19.694535000 |
| O            | 15.387165000 | 26.880900000 | 16.986310000 | C            | 25.293868000 | 28.582483000 | 18.852193000 |
| Zr           | 13.440450000 | 29.364426000 | 13.440450000 | C            | 27.310654000 | 26.176499000 | 18.228750000 |
| O            | 11.493735000 | 30.426760000 | 13.440450000 | C            | 25.125238000 | 27.290127000 | 18.046413000 |
| C            | 10.287052000 | 30.034298000 | 13.440450000 | N            | 26.366206000 | 26.805897000 | 17.454744000 |
| O            | 15.387165000 | 30.426760000 | 13.440450000 | H            | 26.632279000 | 29.538088000 | 20.241526000 |
| C            | 16.593848000 | 30.034298000 | 13.440450000 | H            | 25.222990000 | 29.451602000 | 18.186187000 |
| O            | 16.986310000 | 28.827615000 | 13.440450000 | C            | 28.729413000 | 25.852832000 | 16.404122000 |
| O            | 9.894590000  | 28.827615000 | 13.440450000 | N            | 28.445407000 | 25.693182000 | 17.821370000 |
| C            | 22.671082000 | 26.880900000 | 22.671082000 | C            | 27.478606000 | 25.778280000 | 15.542421000 |
| C            | 20.687003000 | 26.880900000 | 20.687003000 | C            | 26.490598000 | 26.828791000 | 16.003820000 |
| C            | 21.360638000 | 27.201858000 | 22.988008000 | H            | 25.499998000 | 26.633148000 | 15.574914000 |
| C            | 20.384593000 | 27.216911000 | 22.003898000 | H            | 29.454036000 | 25.082530000 | 16.103988000 |
| H            | 21.176773000 | 27.364756000 | 23.999268000 | H            | 27.424846000 | 28.791790000 | 18.869396000 |
| H            | 19.491341000 | 27.477656000 | 22.313835000 | H            | 24.453298000 | 28.663769000 | 19.553587000 |
| O            | 13.440450000 | 28.827615000 | 16.986310000 | H            | 26.797597000 | 27.832012000 | 15.664740000 |
| C            | 13.440450000 | 30.034298000 | 16.593848000 | H            | 29.239418000 | 26.815791000 | 16.235752000 |
| O            | 13.440450000 | 28.827615000 | 9.894590000  | H            | 26.232512000 | 27.348368000 | 21.275827000 |
| C            | 13.440450000 | 30.034298000 | 10.287052000 | H            | 27.924027000 | 27.591166000 | 20.917486000 |
| O            | 13.440450000 | 30.426760000 | 15.387165000 | H            | 27.704843000 | 25.914989000 | 14.480155000 |
| O            | 13.440450000 | 30.426760000 | 11.493735000 | H            | 27.010441000 | 24.791467000 | 15.659295000 |
| C            | 17.333342000 | 27.201858000 | 18.960712000 | H            | 27.749328000 | 25.447710000 | 20.147011000 |
| C            | 18.317452000 | 27.216911000 | 19.936757000 | H            | 26.026483000 | 25.554614000 | 19.800301000 |
| H            | 16.322082000 | 27.364756000 | 19.144577000 | H            | 24.692338000 | 26.496302000 | 18.665832000 |
| H            | 18.007515000 | 27.477656000 | 20.830009000 | H            | 24.411171000 | 27.436862000 | 17.230773000 |
| H            | 13.440450000 | 30.790903000 | 9.530447000  | C            | 29.720113000 | 20.906447000 | 19.964790000 |
| H            | 17.350453000 | 26.880900000 | 9.530447000  | O            | 29.260845000 | 20.840181000 | 18.672104000 |
| H            | 17.350453000 | 30.790903000 | 13.440450000 | O            | 29.986719000 | 19.946488000 | 20.627284000 |
| H            | 13.440450000 | 30.790903000 | 17.350453000 | <b>k. PC</b> |              |              |              |
| H            | 9.530447000  | 30.790903000 | 13.440450000 | N            | 26.613142000 | 21.857671000 | 20.407249000 |
| H            | 9.530447000  | 26.880900000 | 17.350453000 | N            | 26.474174000 | 19.913566000 | 18.469442000 |
| H            | 13.440450000 | 22.970897000 | 9.530447000  | C            | 26.654684000 | 20.566816000 | 20.815987000 |
| H            | 9.530447000  | 22.970897000 | 13.440450000 | C            | 26.602841000 | 22.844481000 | 21.317912000 |
| H            | 13.440450000 | 22.970897000 | 17.350453000 | C            | 26.517505000 | 18.993013000 | 17.482000000 |
| H            | 15.026933000 | 25.294417000 | 11.853967000 | C            | 26.685370000 | 19.521285000 | 19.757378000 |
| H            | 11.853967000 | 28.467383000 | 11.853967000 | C            | 26.666895000 | 20.263148000 | 22.183319000 |
| H            | 9.530447000  | 26.880900000 | 9.530447000  | C            | 26.688282000 | 22.628205000 | 22.701489000 |
| H            | 15.026933000 | 28.467383000 | 15.026933000 | C            | 26.728781000 | 17.624911000 | 17.695211000 |
| H            | 11.853967000 | 25.294417000 | 15.026933000 | C            | 26.916722000 | 18.170222000 | 20.043086000 |
| H            | 26.568024000 | 23.848657000 | 20.927715000 | C            | 26.704731000 | 21.289719000 | 23.116611000 |
| H            | 26.348671000 | 19.383283000 | 16.486141000 | C            | 26.922123000 | 17.227149000 | 19.026353000 |
| H            | 26.715692000 | 19.229978000 | 22.517614000 | C            | 26.809924000 | 23.730866000 | 23.728960000 |
| H            | 27.088407000 | 17.831847000 | 21.066161000 | C            | 26.809923000 | 16.592386000 | 16.590491000 |

## ARTICLE

## Journal Name

|    |              |              |              |   |              |              |              |
|----|--------------|--------------|--------------|---|--------------|--------------|--------------|
| O  | 26.880885000 | 24.934150000 | 23.334947000 | O | 24.934210000 | 30.426941000 | 26.880925000 |
| O  | 26.880902000 | 23.334950000 | 24.934138000 | O | 26.880889000 | 30.426939000 | 24.934203000 |
| O  | 26.880901000 | 15.387210000 | 16.986393000 | O | 26.880879000 | 30.426942000 | 28.827590000 |
| O  | 26.880886000 | 16.986407000 | 15.387201000 | O | 27.912786000 | 27.912776000 | 27.912777000 |
| Zr | 26.878143000 | 26.881612000 | 24.237883000 | O | 28.827596000 | 30.426944000 | 26.880863000 |
| Zr | 26.878211000 | 24.239690000 | 26.880717000 | O | 30.426933000 | 24.934198000 | 26.880924000 |
| Zr | 26.878210000 | 13.440633000 | 16.081660000 | O | 30.426936000 | 26.880929000 | 24.934199000 |
| Zr | 26.878143000 | 16.083467000 | 13.439738000 | O | 30.426944000 | 26.880866000 | 28.827595000 |
| O  | 24.934203000 | 26.880849000 | 23.334882000 | O | 30.426946000 | 28.827594000 | 26.880867000 |
| O  | 25.848911000 | 25.848918000 | 25.848917000 | O | 24.934211000 | 26.880924000 | 30.426942000 |
| O  | 25.849015000 | 27.912768000 | 25.849028000 | O | 26.880889000 | 24.934201000 | 30.426937000 |
| O  | 27.912782000 | 25.849032000 | 25.849031000 | O | 26.880878000 | 28.827589000 | 30.426943000 |
| O  | 27.912889000 | 27.912886000 | 25.848919000 | O | 28.827598000 | 26.880862000 | 30.426940000 |
| O  | 26.880945000 | 28.827581000 | 23.334856000 | O | 25.848909000 | 12.408453000 | 12.408455000 |
| O  | 28.827591000 | 26.880922000 | 23.334870000 | O | 23.334862000 | 11.493756000 | 13.440411000 |
| O  | 24.934197000 | 23.334881000 | 26.880846000 | O | 23.334855000 | 15.387135000 | 13.440484000 |
| O  | 25.849012000 | 25.849025000 | 27.912771000 | O | 23.334864000 | 13.440413000 | 11.493754000 |
| O  | 27.912892000 | 25.848913000 | 27.912887000 | O | 23.334856000 | 13.440488000 | 15.387138000 |
| O  | 26.880944000 | 23.334850000 | 28.827576000 | O | 24.934211000 | 9.894408000  | 13.440426000 |
| O  | 28.827591000 | 23.334868000 | 26.880917000 | O | 26.880889000 | 9.894413000  | 15.387149000 |
| O  | 25.849012000 | 12.408579000 | 14.472325000 | O | 27.912786000 | 12.408573000 | 12.408574000 |
| O  | 25.848911000 | 14.472433000 | 14.472432000 | O | 26.880878000 | 9.894407000  | 11.493761000 |
| O  | 24.934197000 | 13.440504000 | 16.986469000 | O | 28.827598000 | 9.894410000  | 13.440488000 |
| O  | 26.880944000 | 11.493774000 | 16.986500000 | O | 30.426944000 | 11.493755000 | 13.440484000 |
| O  | 27.912892000 | 12.408463000 | 14.472437000 | O | 30.426936000 | 15.387151000 | 13.440421000 |
| O  | 27.912782000 | 14.472319000 | 14.472318000 | O | 30.426946000 | 13.440483000 | 11.493756000 |
| O  | 28.827591000 | 13.440433000 | 16.986482000 | O | 30.426933000 | 13.440426000 | 15.387152000 |
| O  | 25.849015000 | 14.472322000 | 12.408582000 | O | 24.934210000 | 13.440425000 | 9.894409000  |
| O  | 24.934203000 | 16.986468000 | 13.440501000 | O | 26.880879000 | 11.493760000 | 9.894408000  |
| O  | 27.912889000 | 14.472431000 | 12.408464000 | O | 26.880889000 | 15.387147000 | 9.894411000  |
| O  | 26.880945000 | 16.986494000 | 11.493769000 | O | 28.827596000 | 13.440487000 | 9.894406000  |
| O  | 28.827591000 | 16.986480000 | 13.440428000 | C | 23.753697000 | 27.066116000 | 30.007949000 |
| C  | 23.755332000 | 26.686089000 | 23.755213000 | C | 23.753135000 | 30.008630000 | 27.063604000 |
| Zr | 24.236612000 | 26.881475000 | 26.880552000 | C | 26.696398000 | 30.008246000 | 30.008106000 |
| Zr | 26.880671000 | 29.524609000 | 26.880680000 | C | 30.007968000 | 30.008237000 | 26.695581000 |
| Zr | 29.524440000 | 26.882357000 | 26.881381000 | C | 30.008286000 | 26.697416000 | 30.008420000 |
| C  | 27.064326000 | 30.008530000 | 23.753165000 | C | 23.753697000 | 10.313401000 | 13.255234000 |
| C  | 30.008123000 | 27.066993000 | 23.753823000 | C | 23.753135000 | 13.257746000 | 10.312720000 |
| C  | 23.755714000 | 23.756676000 | 26.684338000 | C | 26.696398000 | 10.313244000 | 10.313104000 |
| Zr | 26.880615000 | 26.881402000 | 29.524137000 | C | 30.008286000 | 10.312930000 | 13.623934000 |
| C  | 27.065914000 | 23.754135000 | 30.008060000 | C | 30.007968000 | 13.625768000 | 10.313113000 |
| C  | 30.007964000 | 23.754748000 | 27.067567000 | H | 27.351814000 | 30.759513000 | 23.002127000 |
| Zr | 24.236612000 | 13.440798000 | 13.439875000 | H | 30.758179000 | 27.358190000 | 23.003211000 |
| Zr | 26.880615000 | 10.797213000 | 13.439948000 | H | 23.008991000 | 23.009158000 | 26.377462000 |
| C  | 23.755714000 | 13.637012000 | 16.564674000 | H | 27.355985000 | 23.003402000 | 30.758391000 |
| C  | 27.065914000 | 10.313290000 | 16.567215000 | H | 30.757581000 | 23.004153000 | 27.359935000 |
| Zr | 29.524440000 | 13.439969000 | 13.438993000 | H | 23.008991000 | 13.943888000 | 17.312192000 |
| C  | 30.007964000 | 13.253783000 | 16.566602000 | H | 27.355985000 | 9.562959000  | 17.317948000 |
| Zr | 26.880671000 | 13.440670000 | 10.796741000 | H | 30.757582000 | 12.961415000 | 17.317197000 |
| C  | 23.755332000 | 16.566137000 | 13.635261000 | H | 27.351814000 | 17.319223000 | 9.561837000  |
| C  | 27.064326000 | 16.568185000 | 10.312820000 | H | 30.758179000 | 17.318139000 | 12.963160000 |
| C  | 30.008123000 | 16.567527000 | 13.254357000 | H | 23.003255000 | 27.356162000 | 30.758555000 |
| O  | 23.334855000 | 26.880866000 | 24.934215000 | H | 23.001913000 | 30.759916000 | 27.349810000 |
| O  | 23.334856000 | 24.934212000 | 26.880862000 | H | 26.407446000 | 30.758917000 | 30.758911000 |
| O  | 25.848909000 | 27.912895000 | 27.912897000 | H | 30.758582000 | 30.758568000 | 26.405278000 |
| O  | 23.334862000 | 26.880939000 | 28.827594000 | H | 30.759373000 | 26.409850000 | 30.759355000 |
| O  | 23.334864000 | 28.827596000 | 26.880937000 | H | 23.003255000 | 9.562795000  | 12.965188000 |



| Journal Name |              |              |              | ARTICLE |              |              |              |
|--------------|--------------|--------------|--------------|---------|--------------|--------------|--------------|
| H            | 23.001913000 | 12.971540000 | 9.561434000  | Zr      | 10.956924000 | 26.880900000 | 13.440450000 |
| H            | 26.407446000 | 9.562439000  | 9.562434000  | O       | 9.894590000  | 26.880900000 | 11.493735000 |
| H            | 30.759373000 | 9.561995000  | 13.911500000 | O       | 12.408223000 | 27.913127000 | 14.472677000 |
| H            | 30.758582000 | 13.916071000 | 9.562782000  | C       | 10.287052000 | 26.880900000 | 10.287052000 |
| H            | 25.215026000 | 11.776433000 | 15.102845000 | Zr      | 15.923976000 | 26.880900000 | 13.440450000 |
| H            | 28.544134000 | 11.776251000 | 11.775822000 | O       | 16.986310000 | 26.880900000 | 11.493735000 |
| H            | 28.555271000 | 15.099035000 | 15.098322000 | C       | 16.593848000 | 26.880900000 | 10.287052000 |
| H            | 25.215244000 | 15.103495000 | 11.776660000 | O       | 16.986310000 | 26.880900000 | 15.387165000 |
| H            | 25.215244000 | 28.544690000 | 25.217855000 | O       | 14.472677000 | 27.913127000 | 12.408223000 |
| H            | 28.555271000 | 25.223028000 | 25.222315000 | C       | 16.593848000 | 26.880900000 | 16.593848000 |
| H            | 28.544134000 | 28.545528000 | 28.545099000 | C       | 17.650268000 | 26.880900000 | 17.650268000 |
| H            | 25.215026000 | 25.218505000 | 28.544917000 | C       | 19.634347000 | 26.880900000 | 19.634347000 |
| O            | 14.472677000 | 25.848673000 | 14.472677000 | O       | 9.894590000  | 26.880900000 | 15.387165000 |
| O            | 12.408223000 | 25.848673000 | 12.408223000 | C       | 10.287052000 | 26.880900000 | 16.593848000 |
| O            | 14.472677000 | 25.848673000 | 12.408223000 | Zr      | 13.440450000 | 26.880900000 | 15.923976000 |
| O            | 12.408223000 | 25.848673000 | 14.472677000 | O       | 11.493735000 | 26.880900000 | 16.986310000 |
| Zr           | 13.440450000 | 24.397374000 | 13.440450000 | O       | 14.472677000 | 27.913127000 | 14.472677000 |
| O            | 11.493735000 | 23.335040000 | 13.440450000 | Zr      | 13.440450000 | 26.880900000 | 10.956924000 |
| C            | 10.287052000 | 23.727502000 | 13.440450000 | O       | 11.493735000 | 26.880900000 | 9.894590000  |
| O            | 15.387165000 | 23.335040000 | 13.440450000 | O       | 15.387165000 | 26.880900000 | 9.894590000  |
| C            | 16.593848000 | 23.727502000 | 13.440450000 | O       | 12.408223000 | 27.913127000 | 12.408223000 |
| C            | 17.650268000 | 22.671082000 | 13.440450000 | O       | 15.387165000 | 26.880900000 | 16.986310000 |
| C            | 19.634347000 | 20.687003000 | 13.440450000 | Zr      | 13.440450000 | 29.364426000 | 13.440450000 |
| C            | 18.960712000 | 22.988008000 | 13.761408000 | O       | 11.493735000 | 30.426760000 | 13.440450000 |
| C            | 19.936757000 | 22.003898000 | 13.776461000 | C       | 10.287052000 | 30.034298000 | 13.440450000 |
| H            | 19.144577000 | 23.999268000 | 13.924306000 | O       | 15.387165000 | 30.426760000 | 13.440450000 |
| H            | 20.830009000 | 22.313835000 | 14.037206000 | C       | 16.593848000 | 30.034298000 | 13.440450000 |
| O            | 9.894590000  | 24.934185000 | 13.440450000 | O       | 16.986310000 | 28.827615000 | 13.440450000 |
| O            | 16.986310000 | 24.934185000 | 13.440450000 | O       | 9.894590000  | 28.827615000 | 13.440450000 |
| C            | 17.333342000 | 21.360638000 | 13.119492000 | C       | 22.671082000 | 26.880900000 | 22.671082000 |
| C            | 18.317452000 | 20.384593000 | 13.104439000 | C       | 20.687003000 | 26.880900000 | 20.687003000 |
| H            | 16.322082000 | 21.176773000 | 12.956594000 | C       | 21.360638000 | 27.201858000 | 22.988008000 |
| H            | 18.007515000 | 19.491341000 | 12.843694000 | C       | 20.384593000 | 27.216911000 | 22.003898000 |
| C            | 22.988008000 | 26.559942000 | 21.360638000 | H       | 21.176773000 | 27.364756000 | 23.999268000 |
| C            | 22.003898000 | 26.544889000 | 20.384593000 | H       | 19.491341000 | 27.477656000 | 22.313835000 |
| H            | 23.999268000 | 26.397044000 | 21.176773000 | O       | 13.440450000 | 28.827615000 | 16.986310000 |
| H            | 22.313835000 | 26.284144000 | 19.491341000 | C       | 13.440450000 | 30.034298000 | 16.593848000 |
| C            | 22.671082000 | 17.650268000 | 13.440450000 | O       | 13.440450000 | 28.827615000 | 9.894590000  |
| C            | 20.687003000 | 19.634347000 | 13.440450000 | C       | 13.440450000 | 30.034298000 | 10.287052000 |
| O            | 13.440450000 | 24.934185000 | 9.894590000  | O       | 13.440450000 | 30.426760000 | 15.387165000 |
| C            | 13.440450000 | 23.727502000 | 10.287052000 | O       | 13.440450000 | 30.426760000 | 11.493735000 |
| O            | 13.440450000 | 24.934185000 | 16.986310000 | C       | 17.333342000 | 27.201858000 | 18.960712000 |
| C            | 13.440450000 | 23.727502000 | 16.593848000 | C       | 18.317452000 | 27.216911000 | 19.936757000 |
| O            | 13.440450000 | 23.335040000 | 15.387165000 | H       | 16.322082000 | 27.364756000 | 19.144577000 |
| O            | 13.440450000 | 23.335040000 | 11.493735000 | H       | 18.007515000 | 27.477656000 | 20.830009000 |
| C            | 18.960712000 | 26.559942000 | 17.333342000 | H       | 13.440450000 | 30.790903000 | 9.530447000  |
| C            | 19.936757000 | 26.544889000 | 18.317452000 | H       | 17.350453000 | 26.880900000 | 9.530447000  |
| H            | 19.144577000 | 26.397044000 | 16.322082000 | H       | 17.350453000 | 30.790903000 | 13.440450000 |
| H            | 20.830009000 | 26.284144000 | 18.007515000 | H       | 13.440450000 | 30.790903000 | 17.350453000 |
| C            | 21.360638000 | 17.333342000 | 13.119492000 | H       | 9.530447000  | 30.790903000 | 13.440450000 |
| C            | 20.384593000 | 18.317452000 | 13.104439000 | H       | 9.530447000  | 26.880900000 | 17.350453000 |
| H            | 21.176773000 | 16.322082000 | 12.956594000 | H       | 13.440450000 | 22.970897000 | 9.530447000  |
| H            | 19.491341000 | 18.007515000 | 12.843694000 | H       | 9.530447000  | 22.970897000 | 13.440450000 |
| C            | 22.988008000 | 18.960712000 | 13.761408000 | H       | 13.440450000 | 22.970897000 | 17.350453000 |
| C            | 22.003898000 | 19.936757000 | 13.776461000 | H       | 15.026933000 | 25.294417000 | 11.853967000 |
| H            | 23.999268000 | 19.144577000 | 13.924306000 | H       | 11.853967000 | 28.467383000 | 11.853967000 |
| H            | 22.313835000 | 20.830009000 | 14.037206000 | H       | 9.530447000  | 26.880900000 | 9.530447000  |

## ARTICLE

## Journal Name

|    |              |              |              |
|----|--------------|--------------|--------------|
| H  | 15.026933000 | 28.467383000 | 15.026933000 |
| H  | 11.853967000 | 25.294417000 | 15.026933000 |
| H  | 26.541878000 | 23.856315000 | 20.918264000 |
| H  | 26.362486000 | 19.372789000 | 16.474842000 |
| H  | 26.655512000 | 19.233597000 | 22.525141000 |
| H  | 27.112026000 | 17.855084000 | 21.062260000 |
| H  | 26.752752000 | 21.071228000 | 24.178282000 |
| H  | 27.096286000 | 16.178167000 | 19.241833000 |
| Cu | 26.230616000 | 21.902625000 | 18.217618000 |
| I  | 25.244169000 | 24.052080000 | 17.444700000 |
| C  | 29.012851000 | 22.461054000 | 18.330723000 |
| C  | 28.652592000 | 22.089051000 | 17.101846000 |
| H  | 28.765768000 | 21.063705000 | 16.771859000 |
| C  | 28.960484000 | 23.801280000 | 18.992142000 |
| H  | 27.943112000 | 24.220275000 | 19.000033000 |
| H  | 29.642325000 | 24.535772000 | 18.553166000 |
| O  | 29.383858000 | 23.525130000 | 20.334363000 |
| H  | 28.296312000 | 22.831940000 | 16.399444000 |
| C  | 29.633563000 | 22.210224000 | 20.476317000 |
| O  | 29.476122000 | 21.565657000 | 19.272504000 |
| O  | 29.942436000 | 21.660948000 | 21.491635000 |
